# Supplementary material for: Natural withanolides, an update
Source: Royal Society of Chemistry journal article supplement (doi:10.1039/d1np00055a), 2021-11-24
Supplement: d1np00055a2.xlsx [file d1np00055a2.xlsx]

## Sheet: Natural withanolides
Note: For structures that have their absolute configurations confirmed by single crystal X-ray analysis, the compounds were written in red. And cases of erroneous
No.	Names	Molecular Formula	Accurate Mass	Molecular Weight	SMILES	InChI	InChIKey	Origin Species	Discovery Year	Isolation Reference DOI, if available	Reference Number in Review	Original Name
1	withanolide D	C28H38O6	470.267	470.606	O=C1[C@@]2(C)[C@@]([C@H]3C[C@]4([H])[C@]2([H])CC[C@@]5(C)[C@@]4([H])CC[C@]5([H])[C@@]([C@]6([H])OC(C(C)=C(C)C6)=O)(C)O)(O3)[C@@H](O)C=C1	InChI=1S/C28H38O6/c1-14-12-22(33-24(31)15(14)2)27(5,32)19-7-6-17-16-13-23-28(34-23)21(30)9-8-20(29)26(28,4)18(16)10-11-25(17,19)3/h8-9,16-19,21-23,30,32H,6-7,10-13H2,1-5H3/t16-,17-,18-,19-,21-,22+,23+,25-,26-,27+,28+/m0/s1	SASUFNRGCZMRFD-JCUIILOWSA-N	Withania sonznifer	1968, 2014	10.1002/ijch.196800085 and 10.1007/s10870-014-0499-1	33,34
2	Withaneomexolide A	C30H40O9	544.267	544.641	O=C1[C@@]2(C)[C@@]([C@H]3C[C@]4([H])[C@]2([H])CC[C@@]5(C)[C@@]4([H])[C@@H](OC(C)=O)[C@@H](O)[C@]5([H])[C@@]([C@]6([H])OC(C(C)=C(C)C6)=O)(C)O)(O3)[C@@H](O)C=C1	InChI=1S/C30H40O9/c1-13-11-20(38-26(35)14(13)2)29(6,36)25-23(34)24(37-15(3)31)22-16-12-21-30(39-21)19(33)8-7-18(32)28(30,5)17(16)9-10-27(22,25)4/h7-8,16-17,19-25,33-34,36H,9-12H2,1-6H3/t16-,17+,19+,20-,21-,22-,23-,24?,25+,27+,28+,29+,30-/m1/s1	WXZUZMBTUPABGA-GJTVJSOTSA-N	Physalis neomexicana	2015	10.1021/acs.jnatprod.5b00698	27	Withaneomexolide A
3	Aurelianolide A	C30H40O8	528.272	528.642	O=C1[C@@]2(C)[C@@]([C@H]3C[C@]4([H])[C@]2([H])CC[C@@]5(C)[C@]4(C[C@@H](OC(C)=O)[C@]5(O)[C@@H]([C@]6([H])OC(C(C)=C(C)C6)=O)C)[H])(O3)[C@@H](O)C=C1	O=C1[C@@]2(C)[C@@]([C@H]3C[C@]4([H])[C@]2([H])CC[C@@]5(C)[C@]4(C[C@@H](OC(C)=O)[C@]5(O)[C@@H]([C@]6([H])OC(C(C)=C(C)C6)=O)C)[H])(O3)[C@@H](O)C=C1	LIICUVJIVOHKOY-QTMYQCJRSA-N	Aureliana fasciculata var. fasciculata	2010	10.1002/hlca.201000126	35
4	(20R,22R)-5β,6β-epoxy-4β,12β,20-trihydroxy-1-oxowith-2-en-24-enolide	C28H38O7	486.262	486.605	O=C1[C@@]2(C)[C@@]([C@H]3C[C@]4([H])[C@]2([H])C[C@@H](O)[C@@]5(C)[C@]4(CC[C@]5([H])[C@@]([C@]6([H])OC(C(C)=C(C)C6)=O)(C)O)[H])(O3)[C@@H](O)C=C1	InChI=1S/C28H38O7/c1-13-10-22(34-24(32)14(13)2)27(5,33)18-7-6-16-15-11-23-28(35-23)20(30)9-8-19(29)26(28,4)17(15)12-21(31)25(16,18)3/h8-9,15-18,20-23,30-31,33H,6-7,10-12H2,1-5H3/t15-,16-,17-,18-,20-,21+,22+,23+,25-,26-,27+,28+/m0/s1	LTPXBNTXQRCEIS-WOIRTEEWSA-N	Acnistus arborescens	2010	10.1021/np100201p	36
5	rel-(20R,22R)-5β,6β-Epoxy-4β,16α,20-trihydroxy-1-oxowitha-2,24-dienolide	C28H38O7	486.262	486.605	O=C1[C@@]2(C)[C@@]([C@H]3C[C@]4([H])[C@]2([H])CC[C@@]5(C)[C@]4(C[C@@H](O)C5[C@@]([C@]6([H])OC(C(C)=C(C)C6)=O)(C)O)[H])(O3)[C@@H](O)C=C1	InChI=1S/C28H38O7/c1-13-10-21(34-24(32)14(13)2)27(5,33)23-18(29)12-17-15-11-22-28(35-22)20(31)7-6-19(30)26(28,4)16(15)8-9-25(17,23)3/h6-7,15-18,20-23,29,31,33H,8-12H2,1-5H3/t15-,16+,17+,18-,20+,21-,22-,23?,25+,26+,27+,28-/m1/s1	XJRRJFCREIXUEL-VHSMDPQVSA-N	Acnistus arborescens	2016	10.1016/j.phytochem.2016.07.003	37
6	Withalongolide O	C28H38O6	470.267	470.606	O=C1[C@@]2(C)[C@@]([C@H]3[C@H](O)[C@]4([H])[C@]2([H])CC[C@@]5(C)[C@]4(CC[C@]5([H])[C@@H]([C@]6([H])OC(C(C)=C(C)C6)=O)C)[H])(O3)[C@@H](O)C=C1	InChI=1S/C28H38O6/c1-13-12-19(33-25(32)14(13)2)15(3)16-6-7-17-22-18(10-11-26(16,17)4)27(5)20(29)8-9-21(30)28(27)24(34-28)23(22)31/h8-9,15-19,21-24,30-31H,6-7,10-12H2,1-5H3/t15-,16+,17-,18-,19+,21-,22-,23+,24+,26+,27-,28+/m0/s1	LEYCAKKWCBJKOV-ZBFLBZGNSA-N	Physalis longifolia	2012	10.1248/cpb.c12-00305	39
7	Withalongolide A	C28H38O7	486.262	486.605	O=C1[C@@]2(CO)[C@@]([C@H]3C[C@]4([H])[C@]2([H])CC[C@@]5(C)[C@]4(CC[C@]5([H])[C@@H]([C@]6([H])OC(C(CO)=C(C)C6)=O)C)[H])(O3)[C@@H](O)C=C1	InChI=1S/C28H38O7/c1-14-10-21(34-25(33)17(14)12-29)15(2)18-4-5-19-16-11-24-28(35-24)23(32)7-6-22(31)27(28,13-30)20(16)8-9-26(18,19)3/h6-7,15-16,18-21,23-24,29-30,32H,4-5,8-13H2,1-3H3/t15-,16-,18+,19-,20-,21+,23-,24+,26+,27-,28+/m0/s1	FJMXKFSOKLFYRC-CKNDUULBSA-N	Physalis longifolia	2011	10.1021/np200635r	38
8	Withalongolide B	C28H38O6	470.267	470.606	O=C1[C@@]2(CO)[C@@]([C@H]3C[C@]4([H])[C@]2([H])CC[C@@]5(C)[C@]4(CC[C@]5([H])[C@@H]([C@]6([H])OC(C(C)=C(C)C6)=O)C)[H])(O3)[C@@H](O)C=C1	InChI=1S/C28H38O6/c1-14-11-21(33-25(32)15(14)2)16(3)18-5-6-19-17-12-24-28(34-24)23(31)8-7-22(30)27(28,13-29)20(17)9-10-26(18,19)4/h7-8,16-21,23-24,29,31H,5-6,9-13H2,1-4H3/t16-,17-,18+,19-,20-,21+,23-,24+,26+,27-,28+/m0/s1	OZBFGYQTKGOIKC-NSYRIIBJSA-N	Physalis longifolia	2011	10.1021/np200635r	38
9	Withalongolide C	C28H38O7	486.262	486.605	O=C1[C@@]2(C)[C@@]([C@H]3C[C@]4([H])[C@]2([H])[C@@H](O)C[C@@]5(C)[C@]4(CC[C@]5([H])[C@@H]([C@]6([H])OC(C(CO)=C(C)C6)=O)C)[H])(O3)[C@@H](O)C=C1	InChI=1S/C28H38O7/c1-13-9-20(34-25(33)16(13)12-29)14(2)17-5-6-18-15-10-23-28(35-23)22(32)8-7-21(31)27(28,4)24(15)19(30)11-26(17,18)3/h7-8,14-15,17-20,22-24,29-30,32H,5-6,9-12H2,1-4H3/t14-,15-,17+,18-,19-,20+,22-,23+,24+,26+,27+,28+/m0/s1	UPRPPTFVJBNIPP-VAPFTTHESA-N	Physalis longifolia	2011	10.1021/np200635r	38
10	28-Hydroxytubocapsanolide A	C28H36O7	484.246	484.589	O=C1[C@@]2(C)[C@@]([C@H]3C[C@]4([H])[C@]2([H])CC[C@@]5(C)[C@@]4([H])C[C@@H](O6)[C@]56[C@@H]([C@]7([H])OC(C(C)=C(CO)C7)=O)C)(O3)[C@@H](O)C=C1	InChI=1S/C28H36O7/c1-13-15(12-29)9-19(33-24(13)32)14(2)27-23(34-27)11-18-16-10-22-28(35-22)21(31)6-5-20(30)26(28,4)17(16)7-8-25(18,27)3/h5-6,14,16-19,21-23,29,31H,7-12H2,1-4H3/t14-,16-,17+,18+,19-,21+,22-,23-,25+,26+,27-,28-/m1/s1	SRMPKKVVFQJHDI-ZBQNNOQGSA-N	Tubocapsicum anomalum	2018	10.1016/j.bioorg.2018.08.034	40
11	27-O-acetyl-withaferin A	C30H40O7	512.277	512.643	O=C1[C@@]2(C)[C@@]([C@H]3C[C@]4([H])[C@]2([H])CC[C@@]5(C)[C@]4(CC[C@]5([H])[C@@H]([C@]6([H])OC(C(COC(C)=O)=C(C)C6)=O)C)[H])(O3)[C@@H](O)C=C1	InChI=1S/C30H40O7/c1-15-12-23(36-27(34)19(15)14-35-17(3)31)16(2)20-6-7-21-18-13-26-30(37-26)25(33)9-8-24(32)29(30,5)22(18)10-11-28(20,21)4/h8-9,16,18,20-23,25-26,33H,6-7,10-14H2,1-5H3/t16-,18-,20+,21-,22-,23+,25-,26+,28+,29-,30+/m0/s1	ARTYOOFBEGPUAU-NSXHFEBNSA-N	Withania aristata	2012	10.1016/j.ejmech.2012.05.032	42
12	5β,6β-Epoxy-4β-hydroxy-27-(1-formyloxy-1-methylethoxy)-1-oxo-witha-2,24-dienolide	C32H44O8	556.304	556.696	O=C1[C@@]2(C)[C@@]([C@H]3C[C@]4([H])[C@]2([H])CC[C@@]5(C)[C@]4(CC[C@]5([H])[C@@H]([C@]6([H])OC(C(COC(C)(C)OC([H])=O)=C(C)C6)=O)C)[H])(O3)[C@@H](O)C=C1	InChI=1S/C32H44O8/c1-17-13-24(39-28(36)20(17)15-37-29(3,4)38-16-33)18(2)21-7-8-22-19-14-27-32(40-27)26(35)10-9-25(34)31(32,6)23(19)11-12-30(21,22)5/h9-10,16,18-19,21-24,26-27,35H,7-8,11-15H2,1-6H3/t18-,19-,21+,22-,23-,24+,26-,27+,30+,31-,32+/m0/s1	VJBIVFCLNSFNTO-KDKZKVEXSA-N	Withania aristata	2012	10.1016/j.ejmech.2012.05.032	42
13	Withalongolide B 4-acetae	C30H40O7	512.277	512.643	O=C1[C@@]2(CO)[C@@]([C@H]3C[C@]4([H])[C@]2([H])CC[C@@]5(C)[C@]4(CC[C@]5([H])[C@@H]([C@]6([H])OC(C(C)=C(C)C6)=O)C)[H])(O3)[C@@H](OC(C)=O)C=C1	InChI=1S/C30H40O7/c1-15-12-23(36-27(34)16(15)2)17(3)20-6-7-21-19-13-26-30(37-26)25(35-18(4)32)9-8-24(33)29(30,14-31)22(19)10-11-28(20,21)5/h8-9,17,19-23,25-26,31H,6-7,10-14H2,1-5H3/t17-,19-,20+,21-,22-,23+,25?,26+,28+,29-,30+/m0/s1	DIOMJMXKGFLTDL-NKIVIZAGSA-N	Acetylation of Withalongolide B	2011	10.1021/np200635r	38
14	Withalongolide B 4,19-diacetae	C32H42O8	554.288	554.68	O=C1[C@@]2(COC(C)=O)[C@@]([C@H]3C[C@]4([H])[C@]2([H])CC[C@@]5(C)[C@]4(CC[C@]5([H])[C@@H]([C@]6([H])OC(C(C)=C(C)C6)=O)C)[H])(O3)[C@@H](OC(C)=O)C=C1	InChI=1S/C32H42O8/c1-16-13-25(39-29(36)17(16)2)18(3)22-7-8-23-21-14-28-32(40-28)27(38-20(5)34)10-9-26(35)31(32,15-37-19(4)33)24(21)11-12-30(22,23)6/h9-10,18,21-25,27-28H,7-8,11-15H2,1-6H3/t18-,21-,22+,23-,24-,25+,27?,28+,30+,31-,32+/m0/s1	QBVJUNNNZGDOHF-XPJWJLPXSA-N	Acetylation of Withalongolide B	2011	10.1021/np200635r	38
15	Withalongolide A 4,19,27-triacetae	C34H44O10	612.293	612.716	O=C1[C@@]2(COC(C)=O)[C@@]([C@H]3C[C@]4([H])[C@]2([H])CC[C@@]5(C)[C@]4(CC[C@]5([H])[C@@H]([C@]6([H])OC(C(COC(C)=O)=C(C)C6)=O)C)[H])(O3)[C@@H](OC(C)=O)C=C1	InChI=1S/C34H44O10/c1-17-13-27(43-31(39)23(17)15-40-19(3)35)18(2)24-7-8-25-22-14-30-34(44-30)29(42-21(5)37)10-9-28(38)33(34,16-41-20(4)36)26(22)11-12-32(24,25)6/h9-10,18,22,24-27,29-30H,7-8,11-16H2,1-6H3/t18-,22-,24+,25-,26-,27+,29?,30+,32+,33-,34+/m0/s1	KSMCZEDDTUJWBE-MACKPOGHSA-N	Acetylation of Withalongolide A	2011	10.1021/np200635r	38
16	Withalongolide A 4,27-diacetae	C32H42O9	570.283	570.679	O=C1[C@@]2(CO)[C@@]([C@H]3C[C@]4([H])[C@]2([H])CC[C@@]5(C)[C@]4(CC[C@]5([H])[C@@H]([C@]6([H])OC(C(COC(C)=O)=C(C)C6)=O)C)[H])(O3)[C@@H](OC(C)=O)C=C1	InChI=1S/C32H42O9/c1-16-12-25(40-29(37)21(16)14-38-18(3)34)17(2)22-6-7-23-20-13-28-32(41-28)27(39-19(4)35)9-8-26(36)31(32,15-33)24(20)10-11-30(22,23)5/h8-9,17,20,22-25,27-28,33H,6-7,10-15H2,1-5H3/t17-,20-,22+,23-,24-,25+,27?,28+,30+,31-,32+/m0/s1	FDBKWVVSYLVJAN-YXAKPLDSSA-N	Acetylation of Withalongolide A	2011	10.1021/np200635r	38
17	Withalongolide H	C40H58O15	778.378	778.889	O=C1[C@@]2(C)[C@@]([C@H]3C[C@]4([H])[C@]2([H])CC[C@@]5(C)[C@]4(CC[C@]5([H])[C@@H]([C@]6([H])OC(C(CO[C@@H]([C@@H]7O)O[C@H](CO[C@@H]([C@@H]8O)O[C@@H](C)[C@H](O)[C@H]8O)[C@@H](O)[C@@H]7O)=C(C)C6)=O)C)[H])(O3)[C@@H](O)C=C1	InChI=1S/C40H58O15/c1-16-12-24(17(2)21-6-7-22-19-13-28-40(55-28)27(42)9-8-26(41)39(40,5)23(19)10-11-38(21,22)4)53-35(49)20(16)14-50-37-34(48)32(46)30(44)25(54-37)15-51-36-33(47)31(45)29(43)18(3)52-36/h8-9,17-19,21-25,27-34,36-37,42-48H,6-7,10-15H2,1-5H3/t17-,18-,19-,21+,22-,23-,24+,25+,27-,28+,29-,30+,31+,32-,33+,34+,36+,37+,38+,39-,40+/m0/s1	UGNCCZNOFDHTJS-RZHKDLJGSA-N	Physalis longifolia	2011	10.1021/np200635r	38
18	Physagulide T	C30H40O9	544.267	544.641	O=C1[C@@]2(C)[C@@]([C@H]3C[C@]4([H])[C@]2([H])CC[C@@]5(C)[C@]4(O)[C@@H](OC(C)=O)C[C@]5([H])[C@@H]([C@]6([H])OC(C(C)=C(CO)C6)=O)C)(O3)[C@@H](O)C=C1	InChI=1S/C30H40O9/c1-14-17(13-31)10-21(38-26(14)35)15(2)19-11-24(37-16(3)32)29(36)20-12-25-30(39-25)23(34)7-6-22(33)28(30,5)18(20)8-9-27(19,29)4/h6-7,15,18-21,23-25,31,34,36H,8-13H2,1-5H3/t15-,18-,19+,20+,21+,23-,24?,25+,27+,28-,29+,30+/m0/s1	JANNFAOBOZPSMQ-OCSFCCIBSA-N	Physalis angulata var. villosa	2018	10.1016/j.jpba.2017.12.047	43
19	Physagulide V	C30H40O9	544.267	544.641	O=C1[C@@]2(C)[C@@]([C@H]3C[C@]4([H])[C@]2([H])CC[C@@]5(C)[C@]4(O)[C@@H](OC(C)=O)[C@H](O)[C@]5([H])[C@@H]([C@]6([H])OC(C(C)=C(C)C6)=O)C)(O3)[C@@H](O)C=C1	InChI=1S/C30H40O9/c1-13-11-19(38-26(35)14(13)2)15(3)23-24(34)25(37-16(4)31)29(36)18-12-22-30(39-22)21(33)8-7-20(32)28(30,6)17(18)9-10-27(23,29)5/h7-8,15,17-19,21-25,33-34,36H,9-12H2,1-6H3/t15-,17+,18-,19-,21+,22-,23+,24-,25?,27-,28+,29-,30-/m1/s1	RCJHQSAJBIRCFQ-BFZWRNSHSA-N	Physalis angulata var. villosa	2018	10.1016/j.jpba.2017.12.047	43
20	24,25-epoxywithanolide D	C28H38O7	486.262	486.605	O=C1[C@@]2(C)[C@@]([C@H]3C[C@]4([H])[C@]2([H])CC[C@@]5(C)[C@]4(CC[C@]5([H])[C@@]([C@]6([H])OC([C@@](C)(O7)[C@]7(C)C6)=O)(C)O)[H])(O3)[C@@H](O)C=C1	InChI=1S/C28H38O7/c1-23-11-10-16-14(12-20-28(34-20)19(30)9-8-18(29)25(16,28)3)15(23)6-7-17(23)26(4,32)21-13-24(2)27(5,35-24)22(31)33-21/h8-9,14-17,19-21,30,32H,6-7,10-13H2,1-5H3/t14-,15-,16-,17-,19-,20+,21+,23-,24-,25-,26+,27+,28+/m0/s1	XSDOAUFXJBFVLE-UVEJPJCTSA-N	Physalis angulate	1986, 2015	10.1007/BF00599261 and 10.1016/j.steroids.2015.08.015	45, 46
21	4-O-acetyl-24,25-epoxywithanolide D	C30H40O8	528.272	528.642	O=C1[C@@]2(C)[C@@]([C@H]3C[C@]4([H])[C@]2([H])CC[C@@]5(C)[C@]4(CC[C@]5([H])[C@@]([C@]6([H])OC([C@@](C)(O7)[C@]7(C)C6)=O)(C)O)[H])(O3)[C@@H](OC(C)=O)C=C1	InChI=1S/C30H40O8/c1-15(31)35-21-10-9-20(32)27(4)18-11-12-25(2)17(16(18)13-22-30(21,27)37-22)7-8-19(25)28(5,34)23-14-26(3)29(6,38-26)24(33)36-23/h9-10,16-19,21-23,34H,7-8,11-14H2,1-6H3/t16-,17-,18-,19-,21?,22+,23+,25-,26-,27-,28+,29+,30+/m0/s1	NIGLVFSONHQZMB-ZOZYJSBYSA-N	Acetylation of 24,25-epoxywithanolide D	2015	10.1016/j.steroids.2015.08.015	46
22	Virginol A	C30H42O8	530.288	530.658	O=C1[C@@]2(C)[C@@]([C@H]3C[C@]4([H])[C@]2([H])CC[C@@]5(C)[C@@]4([H])C[C@@H](OC(C)=O)[C@]5([H])[C@H](C)[C@]6([H])O[C@@H](O)[C@@](C)(O7)[C@]7(C)C6)(O3)[C@@H](O)C=C1	InChI=1S/C30H42O8/c1-14(20-13-27(4)29(6,38-27)25(34)36-20)24-19(35-15(2)31)12-18-16-11-23-30(37-23)22(33)8-7-21(32)28(30,5)17(16)9-10-26(18,24)3/h7-8,14,16-20,22-25,33-34H,9-13H2,1-6H3/t14-,16-,17+,18+,19?,20-,22+,23-,24+,25-,26+,27+,28+,29-,30-/m1/s1	JISUUFLMYPAIBP-IVYYNVDMSA-N	Physalis virginiana	2010	10.1016/j.steroids.2010.01.014	26
23	Virginol B	C28H40O6	472.283	472.622	O=C1[C@@]2(C)[C@@]([C@H]3C[C@]4([H])[C@]2([H])CC[C@@]5(C)[C@@]4([H])CC[C@]5([H])[C@H](C)[C@]6([H])O[C@@H](O)[C@@](C)(O7)[C@]7(C)C6)(O3)[C@@H](O)C=C1	InChI=1S/C28H40O6/c1-14(19-13-25(3)27(5,34-25)23(31)32-19)16-6-7-17-15-12-22-28(33-22)21(30)9-8-20(29)26(28,4)18(15)10-11-24(16,17)2/h8-9,14-19,21-23,30-31H,6-7,10-13H2,1-5H3/t14-,15-,16+,17-,18-,19+,21-,22+,23+,24+,25-,26-,27+,28+/m0/s1	HFYMKTKGEFWIMM-RPHDMLFQSA-N	Physalis virginiana	2010	10.1016/j.steroids.2010.01.014	26
24	Alkekenginin A	C30H42O8	530.288	530.658	O=C1[C@@]2(C)[C@@]([C@H]3C[C@]4([H])[C@]2([H])CC[C@@]5(C)[C@@]4(C[C@@H](OC(C)=O)[C@]5([H])[C@@H]([C@]6([H])O[C@@H](O)[C@@](C)(O7)[C@]7(C)C6)C)[H])(O3)[C@@H](O)C=C1	InChI=1S/C30H42O8/c1-14(20-13-27(4)29(6,38-27)25(34)36-20)24-19(35-15(2)31)12-18-16-11-23-30(37-23)22(33)8-7-21(32)28(30,5)17(16)9-10-26(18,24)3/h7-8,14,16-20,22-25,33-34H,9-13H2,1-6H3/t14-,16-,17+,18-,19?,20-,22+,23-,24+,25-,26+,27+,28+,29-,30-/m1/s1	JISUUFLMYPAIBP-PPHNAVITSA-N	Physalis alkekengi L. var. franchetii (Mast.) Makino	2014	10.1016/j.phytol.2014.08.004	47
25	Physapubescin B	C30H42O8	530.288	530.658	O=C1[C@@]2(C)[C@@]([C@H]3C[C@]4([H])[C@]2([H])CC[C@@]5(C)[C@]4([C@H](OC(C)=O)C[C@]5([H])[C@@H]([C@]6([H])O[C@@H](O)[C@@](C)(O7)[C@]7(C)C6)C)[H])(O3)[C@@H](O)C=C1	InChI=1S/C30H42O8/c1-14(20-13-27(4)29(6,38-27)25(34)36-20)18-12-19(35-15(2)31)24-16-11-23-30(37-23)22(33)8-7-21(32)28(30,5)17(16)9-10-26(18,24)3/h7-8,14,16-20,22-25,33-34H,9-13H2,1-6H3/t14-,16+,17-,18+,19?,20+,22-,23+,24+,25+,26+,27-,28-,29+,30+/m0/s1	QYJHRILRWPBICK-NQLZVEOISA-N	Physalis pubescens	2013	10.1016/j.steroids.2013.05.008	52
26	Physapubescin I	C32H44O10	588.293	588.694	O=C1[C@@]2(C)[C@@]([C@H]3C[C@]4([H])[C@]2([H])CC[C@@]5(C)[C@]4([C@@H](OC(C)=O)[C@@H](OC(C)=O)[C@]5([H])[C@@H]([C@]6([H])O[C@@H](O)[C@@](C)(O7)[C@]7(C)C6)C)[H])(O3)[C@@H](O)C=C1	InChI=1S/C32H44O10/c1-14(19-13-29(5)31(7,42-29)27(37)40-19)23-25(38-15(2)33)26(39-16(3)34)24-17-12-22-32(41-22)21(36)9-8-20(35)30(32,6)18(17)10-11-28(23,24)4/h8-9,14,17-19,21-27,36-37H,10-13H2,1-7H3/t14-,17-,18+,19-,21+,22-,23+,24-,25?,26?,27-,28-,29+,30+,31-,32-/m1/s1	UECKXLVPKPXLSG-MIPZPNMOSA-N	Physalis pubescens	2016	10.1016/j.steroids.2016.09.002	25
27	(20S,22R,24S,25S,26R)-15α-acetoxy-5,6β:22,26:24,25-triepoxy-26-methoxy-4β-hydroxyergost-2-en-1-one	C31H44O8	544.304	544.685	O=C1[C@@]2(C)[C@@]([C@H]3C[C@]4([H])[C@]2([H])CC[C@@]5(C)[C@]4([C@@H](OC(C)=O)C[C@]5([H])[C@@H]([C@]6([H])O[C@@H](OC)[C@@](C)(O7)[C@]7(C)C6)C)[H])(O3)[C@@H](O)C=C1	InChI=1S/C31H44O8/c1-15(21-14-28(4)30(6,39-28)26(35-7)37-21)19-13-20(36-16(2)32)25-17-12-24-31(38-24)23(34)9-8-22(33)29(31,5)18(17)10-11-27(19,25)3/h8-9,15,17-21,23-26,34H,10-14H2,1-7H3/t15-,17+,18-,19+,20?,21+,23-,24+,25+,26?,27+,28-,29-,30+,31+/m0/s1	OHRZJLUNKPSUKX-LANVLXNBSA-N	Physalis pubescens	2016	10.1039/c6ra07031k	49
28	Physapubescin K and Peruvianolide C	C31H44O8	544.304	544.685	O=C1[C@@]2(C)[C@@]([C@H]3C[C@]4([H])[C@]2([H])CC[C@@]5(C)[C@@]4([H])[C@@H](OC(C)=O)C[C@]5([H])[C@@H]([C@]6([H])O[C@H](OC)[C@@](C)(O7)[C@]7(C)C6)C)(O3)[C@@H](O)C=C1	InChI=1S/C31H44O8/c1-15(21-14-28(4)30(6,39-28)26(35-7)37-21)19-13-20(36-16(2)32)25-17-12-24-31(38-24)23(34)9-8-22(33)29(31,5)18(17)10-11-27(19,25)3/h8-9,15,17-21,23-26,34H,10-14H2,1-7H3/t15-,17+,18-,19+,20?,21+,23-,24+,25+,26?,27+,28-,29-,30+,31+/m0/s1	OHRZJLUNKPSUKX-LANVLXNBSA-N	Physalis pubescens and Physalis peruviana	2017 and 2019	10.18632/oncotarget.23058 and 10.1016/j.bioorg.2019.03.051	158 and 28
29	Philadelphicalactone C	C28H40O8	504.272	504.62	O=C1[C@@]2(C)[C@@]([C@H]3C[C@]4([H])[C@]2([H])CC[C@@]5(C)[C@]4(C[C@H](O)[C@]5([H])[C@@]([C@]6([H])OC([C@H](C)[C@](C)(O)C6)=O)(C)O)[H])(O3)[C@@H](O)C=C1	InChI=1S/C28H40O8/c1-13-23(32)35-21(12-25(13,3)33)27(5,34)22-17(29)11-16-14-10-20-28(36-20)19(31)7-6-18(30)26(28,4)15(14)8-9-24(16,22)2/h6-7,13-17,19-22,29,31,33-34H,8-12H2,1-5H3/t13-,14+,15-,16-,17-,19-,20+,21+,22-,24-,25+,26-,27-,28+/m0/s1	AUYMUBSSDGARRM-ZAXLKICJSA-N	Physalis philadelphica Lam.	2011	10.1016/j.steroids.2011.03.018	48
30	16-Deoxyphiladelphicalactone C	C28H40O7	488.277	488.621	O=C1[C@@]2(C)[C@@]([C@H]3C[C@]4([H])[C@]2([H])CC[C@@]5(C)[C@@]4([H])CC[C@]5([H])[C@@]([C@]6([H])OC([C@H](C)[C@](C)(O)C6)=O)(C)O)(O3)[C@@H](O)C=C1	InChI=1S/C28H40O7/c1-14-23(31)34-22(13-25(14,3)32)27(5,33)18-7-6-16-15-12-21-28(35-21)20(30)9-8-19(29)26(28,4)17(15)10-11-24(16,18)2/h8-9,14-18,20-22,30,32-33H,6-7,10-13H2,1-5H3/t14-,15-,16-,17-,18-,20-,21+,22+,24-,25+,26-,27+,28+/m0/s1	YVAXCGKWKBGKLK-FBJANDBVSA-N	Physalis philadelphica	2018	10.1016/j.phytochem.2018.04.018	44
31	(20S,22R,24S,25S,26R/S)-15α-Acetoxy-5,6β:22,26:diepoxy-24-methoxy-4β,25,26-trihydroxyergost-2-en-1-one	C31H46O9	562.314	562.7	O=C1[C@@]2(C)[C@@]([C@H]3C[C@]4([H])[C@]2([H])CC[C@@]5(C)[C@]4([C@@H](OC(C)=O)C[C@]5([H])[C@@H]([C@]6([H])OC(O)[C@@](C)(OC)[C@@](O)(C)C6)C)[H])(O3)[C@@H](O)C=C1	InChI=1S/C31H46O9/c1-15(21-14-28(4,36)30(6,37-7)26(35)39-21)19-13-20(38-16(2)32)25-17-12-24-31(40-24)23(34)9-8-22(33)29(31,5)18(17)10-11-27(19,25)3/h8-9,15,17-21,23-26,34-36H,10-14H2,1-7H3/t15-,17+,18-,19+,20?,21+,23-,24+,25+,26?,27+,28+,29-,30?,31+/m0/s1	OBKFGJJEZVUXPM-JYYWOBKJSA-N	Physalis pubescens L.	2016	10.1039/c6ra07031k	49
32	Capsisteroid F	C28H42O8	506.288	506.636	O=C1[C@@]2(C)[C@@]([C@H]3C[C@]4([H])[C@]2([H])CC[C@@]5(C)[C@]4(CC[C@]5(O)[C@@H]([C@]6([H])OC(O)[C@@](C)(O)[C@@](O)(C)C6)C)[H])(O3)[C@@H](O)C=C1	InChI=1S/C28H42O8/c1-14(18-13-24(3,32)26(5,33)22(31)35-18)27(34)11-9-16-15-12-21-28(36-21)20(30)7-6-19(29)25(28,4)17(15)8-10-23(16,27)2/h6-7,14-18,20-22,30-34H,8-13H2,1-5H3/t14-,15+,16+,17+,18-,20+,21-,22?,23+,24-,25+,26-,27+,28-/m1/s1	LBQFWILJEBGBMG-TUBMQUBHSA-N	Solanum capsicoides	2015	10.1039/c5ra12014d	50
33	Physapubescin K1	C32H46O11	606.304	606.709	O=C1[C@@]2(C)[C@@]([C@H]3C[C@]4([H])[C@]2([H])CC[C@@]5(C)[C@@]4([H])[C@@H](OC(C)=O)[C@@H](OC(C)=O)[C@]5([H])[C@@H]([C@]6([H])OC(O)[C@@](C)(O)[C@@](O)(C)C6)C)(O3)[C@@H](O)C=C1	InChI=1S/C32H46O11/c1-14(19-13-29(5,38)31(7,39)27(37)42-19)23-25(40-15(2)33)26(41-16(3)34)24-17-12-22-32(43-22)21(36)9-8-20(35)30(32,6)18(17)10-11-28(23,24)4/h8-9,14,17-19,21-27,36-39H,10-13H2,1-7H3/t14-,17-,18+,19-,21+,22-,23+,24-,25?,26?,27?,28-,29-,30+,31-,32-/m1/s1	ILKMLUUCUSOIID-WTRHNKJASA-N	Physalis pubescens L.	2020	10.1016/j.fitote.2020.104692	51
34	Physapubescin G	C30H42O8	530.288	530.658	O=C1[C@@]2(C)[C@@]([C@H]3C[C@]4([H])[C@]2([H])CC[C@@]5(C)[C@@]4([H])[C@@H](OC(C)=O)C[C@@H]5[C@@H]([C@](CC(C(C)=O)C)([H])OC([H])=O)C)(O3)[C@@H](O)C=C1	InChI=1S/C30H42O8/c1-15(17(3)32)11-22(36-14-31)16(2)21-13-23(37-18(4)33)27-19-12-26-30(38-26)25(35)8-7-24(34)29(30,6)20(19)9-10-28(21,27)5/h7-8,14-16,19-23,25-27,35H,9-13H2,1-6H3/t15?,16-,19+,20-,21+,22+,23-,25-,26+,27+,28+,29-,30+/m0/s1	XIBQYHPSZANBJH-APRLCGMQSA-N	Physalis pubescens	2016	10.1016/j.steroids.2016.09.002	25
35	Physapubescin H	C30H42O7	514.293	514.659	O=C1[C@@]2(C)[C@@]([C@H]3C[C@]4([H])[C@]2([H])CC[C@@]5(C)[C@]4([C@@H](OC(C)=O)C[C@]5([H])[C@@H]([C@]6([H])O[C@@H](O)[C@@](C)(O7)[C@]7(C)C6)C)[H])(O3)CC=C1	InChI=1S/C30H42O7/c1-15(21-14-27(4)29(6,37-27)25(33)35-21)19-13-20(34-16(2)31)24-17-12-23-30(36-23)10-7-8-22(32)28(30,5)18(17)9-11-26(19,24)3/h7-8,15,17-21,23-25,33H,9-14H2,1-6H3/t15-,17+,18-,19+,20?,21+,23+,24+,25+,26+,27-,28-,29+,30+/m0/s1	CGZNGGKQSNSZKM-ATKJRTKBSA-N	Physalis pubescens	2016	10.1016/j.steroids.2016.09.002	25
36	Virginol C	C30H42O7	514.293	514.659	O=C1[C@@]2(C)[C@@]([C@H]3C[C@]4([H])[C@]2([H])CC[C@@]5(C)[C@@]4([H])C[C@@H](OC(C)=O)[C@]5([H])[C@H](C)[C@]6([H])O[C@@H](O)[C@@](C)(O7)[C@]7(C)C6)(O3)CC=C1	InChI=1S/C30H42O7/c1-15(21-14-27(4)29(6,37-27)25(33)35-21)24-20(34-16(2)31)13-19-17-12-23-30(36-23)10-7-8-22(32)28(30,5)18(17)9-11-26(19,24)3/h7-8,15,17-21,23-25,33H,9-14H2,1-6H3/t15-,17-,18+,19+,20?,21-,23-,24+,25-,26+,27+,28+,29-,30-/m1/s1	MYXQLZRXBHWFOU-MJJCLYFBSA-N	Physalis virginiana	2010	10.1016/j.steroids.2010.01.014	26
37	Withaneomexolide B	C30H42O8	530.288	530.658	O=C1[C@@]2(C)[C@@]([C@H]3C[C@]4([H])[C@]2([H])CC[C@@]5(C)[C@@]4([C@@H](OC(C)=O)C[C@]5([H])[C@@]([C@]6([H])OC([C@H](C)[C@@H](C)C6)=O)(C)O)O)(O3)CC=C1	InChI=1S/C30H42O8/c1-15-12-22(37-25(33)16(15)2)28(6,34)20-14-24(36-17(3)31)30(35)19-13-23-29(38-23)10-7-8-21(32)27(29,5)18(19)9-11-26(20,30)4/h7-8,15-16,18-20,22-24,34-35H,9-14H2,1-6H3/t15-,16+,18-,19+,20-,22+,23+,24?,26+,27-,28+,29+,30+/m0/s1	TZUFAJFRNMHLPB-JGRGFOCHSA-N	Physalis neomexicana	2015	10.1021/acs.jnatprod.5b00698	27	withaneomexolide B
38	Peruvianolide D	C28H40O6	472.283	472.622	O=C1[C@@]2(C)[C@@]([C@H]3C[C@]4([H])[C@]2([H])CC[C@@]5(C)[C@@]4([H])CC[C@]5([H])[C@@H]([C@]6([H])OC([C@@](C)(O)[C@@](C)(O)C6)=O)C)(O3)CC=C1	InChI=1S/C28H40O6/c1-15(20-14-25(3,31)27(5,32)23(30)33-20)17-8-9-18-16-13-22-28(34-22)11-6-7-21(29)26(28,4)19(16)10-12-24(17,18)2/h6-7,15-20,22,31-32H,8-14H2,1-5H3/t15-,16-,17+,18-,19-,20+,22+,24+,25-,26-,27+,28+/m0/s1	WYLGHHULPDULFM-BJAQEVBISA-N	Physalis peruviana	2019	10.1016/j.bioorg.2019.03.051	28
39	Physanicandrolide A	C30H40O8	528.272	528.642	O=C1[C@@]2(C)[C@@]([C@H]3C[C@]4([H])[C@]2([H])CC[C@@]5(C)[C@]4(O)[C@@H](OC(C)=O)C[C@]5([H])[C@@]([C@]6([H])OC(C(C)=C(C)C6)=O)(C)O)(O3)CC=C1	InChI=1S/C30H40O8/c1-15-12-22(37-25(33)16(15)2)28(6,34)20-14-24(36-17(3)31)30(35)19-13-23-29(38-23)10-7-8-21(32)27(29,5)18(19)9-11-26(20,30)4/h7-8,18-20,22-24,34-35H,9-14H2,1-6H3/t18-,19+,20-,22+,23+,24?,26+,27-,28+,29+,30+/m0/s1	PTYVUYUGERGSMS-WYVTYVLXSA-N	Physalis nicandroides	2019	10.1021/acs.jnatprod.9b00233	29
40	(17S,20R,22R)-5β,6β-epoxy-18,20-dihydroxy-1-oxowitha-2,24-dienolide	C28H38O6	470.267	470.606	O=C1[C@@]2(C)[C@@]([C@H]3C[C@]4([H])[C@]2([H])CC[C@@]5(CO)[C@@]4([H])CC[C@@H]5[C@](C)([C@]6([H])OC(C(C)=C(C)C6)=O)O)(O3)CC=C1	InChI=1S/C28H38O6/c1-15-12-22(33-24(31)16(15)2)26(4,32)20-8-7-19-17-13-23-28(34-23)10-5-6-21(30)25(28,3)18(17)9-11-27(19,20)14-29/h5-6,17-20,22-23,29,32H,7-14H2,1-4H3/t17-,18+,19+,20-,22-,23-,25+,26-,27-,28-/m1/s1	FHRQDLFXMSCOPX-CXOKHPRWSA-N	Physalis alkekengi L. var franchetii	2020	10.1016/j.bioorg.2020.103614	30
41	16α-Hydroxyjaborosalactone A	C28H38O6	470.267	470.606	O=C1[C@@]2(C)[C@@]([C@H]3CC4C2CC[C@@]5(C)C4C[C@@H](O)[C@]5([H])[C@H](C)C6OC(C(CO)=C(C)C6)=O)(O3)CC=C1	InChI=1S/C28H38O6/c1-14-10-21(33-25(32)17(14)13-29)15(2)24-20(30)12-19-16-11-23-28(34-23)8-5-6-22(31)27(28,4)18(16)7-9-26(19,24)3/h5-6,15-16,18-21,23-24,29-30H,7-13H2,1-4H3/t15-,16?,18?,19?,20-,21?,23-,24+,26+,27+,28-/m1/s1	RIXXJKJUESZIHF-VYEPZVCISA-N	Nicandra john-tyleriana	2015	10.1021/np500824f	31
42	16-Oxojaborosalactone A	C28H36O6	468.251	468.59	O=C1[C@@]2(C)[C@@]([C@H]3CC4C2CC[C@@]5(C)C4CC([C@]5([H])[C@H](C)C6OC(C(CO)=C(C)C6)=O)=O)(O3)CC=C1	InChI=1S/C28H36O6/c1-14-10-21(33-25(32)17(14)13-29)15(2)24-20(30)12-19-16-11-23-28(34-23)8-5-6-22(31)27(28,4)18(16)7-9-26(19,24)3/h5-6,15-16,18-19,21,23-24,29H,7-13H2,1-4H3/t15-,16?,18?,19?,21?,23-,24+,26+,27+,28-/m1/s1	SCCJPBJHQJVSNO-YTRVUELPSA-N	Nicandra john-tyleriana	2015	10.1021/np500824f	31
43	17-Deoxy-23β-hydroxywithanolide E	C28H38O7	486.262	486.605	O=C1[C@@]2(C)[C@@]([C@H]3C[C@]4([H])[C@]2([H])CC[C@@]5(C)[C@@]4(O)CC[C@]5([H])[C@@]([C@]6([H])OC(C(C)=C(C)[C@@H]6O)=O)(C)O)(O3)CC=C1	InChI=1S/C28H38O7/c1-14-15(2)23(31)34-22(21(14)30)26(5,32)18-9-12-27(33)17-13-20-28(35-20)10-6-7-19(29)25(28,4)16(17)8-11-24(18,27)3/h6-7,16-18,20-22,30,32-33H,8-13H2,1-5H3/t16-,17+,18-,20+,21-,22+,24+,25-,26+,27+,28+/m0/s1	XWNAKVHUFVDYOQ-VTFULNBYSA-N	Physalis peruviana	2017	10.1021/acs.jnatprod.6b01129	32
44	Physapubescin D	C30H44O8	532.304	532.674	O=C1[C@@]2(C)[C@@]([C@H]3C[C@]4([H])[C@]2([H])CC[C@@]5(C)[C@]4([C@@H](OC(C)=O)C[C@]5([H])[C@@H]([C@]6([H])O[C@@H](O)[C@@](C)(O7)[C@]7(C)C6)C)[H])(O3)[C@@H](O)CC1	InChI=1S/C30H44O8/c1-14(20-13-27(4)29(6,38-27)25(34)36-20)18-12-19(35-15(2)31)24-16-11-23-30(37-23)22(33)8-7-21(32)28(30,5)17(16)9-10-26(18,24)3/h14,16-20,22-25,33-34H,7-13H2,1-6H3/t14-,16+,17-,18+,19?,20+,22-,23+,24+,25+,26+,27-,28-,29+,30+/m0/s1	AELISPAUHAXTSG-NQLZVEOISA-N	Physalis pubescens L.	2013	10.1016/j.steroids.2013.05.008	52
45	(17S,20R,22R)-5β,6β-epoxy-18,20-dihydroxy-1-oxowitha-24-enolide	C28H40O6	472.283	472.622	O=C1[C@@]2(C)[C@@]([C@H]3C[C@]4([H])[C@]2([H])CC[C@@]5(CO)[C@@]4([H])CC[C@]5([H])[C@](C)([C@]6([H])OC(C(C)=C(C)C6)=O)O)(O3)CCC1	InChI=1S/C28H40O6/c1-15-12-22(33-24(31)16(15)2)26(4,32)20-8-7-19-17-13-23-28(34-23)10-5-6-21(30)25(28,3)18(17)9-11-27(19,20)14-29/h17-20,22-23,29,32H,5-14H2,1-4H3/t17-,18+,19+,20-,22-,23-,25+,26-,27-,28-/m1/s1	IJXWOCWABIJNNW-CXOKHPRWSA-N	Physalis angulata L.	2019	10.3390/molecules24081608	54
46	Physanicandrolide B	C31H44O9	560.298	560.684	O=C1[C@@]2(C)[C@@]([C@H]3C[C@]4([H])[C@]2([H])CC[C@@]5(C)[C@]4(O)[C@@H](OC(C)=O)C[C@]5([H])[C@@]([C@]6([H])OC(C(C)=C(C)C6)=O)(C)O)(O3)C[C@H](OC)C1	InChI=1S/C31H44O9/c1-15-10-23(39-26(34)16(15)2)29(6,35)21-13-25(38-17(3)32)31(36)20-12-24-30(40-24)14-18(37-7)11-22(33)28(30,5)19(20)8-9-27(21,31)4/h18-21,23-25,35-36H,8-14H2,1-7H3/t18?,19-,20+,21-,23+,24+,25?,27+,28-,29+,30+,31+/m0/s1	ISWSQYANNTVKDP-SBIDIYMASA-N	Physalis nicandroides var. attenuata	2019	10.1021/acs.jnatprod.9b00233	29
47	3-Methoxy-2,3-dihydrophysagulide J	C31H44O8	544.304	544.685	O=C1[C@@]2(C)[C@@]([C@H]3C[C@]4([H])[C@]2([H])CC[C@@]5(C)[C@]4(O)[C@@H](OC(C)=O)C[C@]5([H])[C@@H]([C@]6([H])OC(C(C)=C(C)C6)=O)C)(O3)C[C@H](OC)C1	InChI=1S/C31H44O8/c1-15-10-23(38-27(34)16(15)2)17(3)21-12-26(37-18(4)32)31(35)22-13-25-30(39-25)14-19(36-7)11-24(33)29(30,6)20(22)8-9-28(21,31)5/h17,19-23,25-26,35H,8-14H2,1-7H3/t17-,19?,20-,21+,22+,23+,25+,26?,28+,29-,30+,31+/m0/s1	SPNOKQUIAPQRCS-UVXOQWIDSA-N	Physalis minima	2020	10.1016/j.fitote.2020.104728	55
48	Withalongolide D	C29H42O8	518.288	518.647	O=C1[C@@]2(CO)[C@@]([C@H]3C[C@]4([H])[C@]2([H])CC[C@@]5(C)[C@]4(CC[C@]5([H])[C@@H]([C@]6([H])OC(C(CO)=C(C)C6)=O)C)[H])(O3)[C@@H](O)[C@@H](OC)C1	InChI=1S/C29H42O8/c1-14-9-21(36-26(34)17(14)12-30)15(2)18-5-6-19-16-10-24-29(37-24)25(33)22(35-4)11-23(32)28(29,13-31)20(16)7-8-27(18,19)3/h15-16,18-22,24-25,30-31,33H,5-13H2,1-4H3/t15-,16-,18+,19-,20-,21+,22?,24+,25-,27+,28-,29-/m0/s1	XGLFAAWROSMYJO-JNGZIRSDSA-N	Physalis longifolia	2011	10.1021/np200635r	38
49	Withalongolide E	C29H42O8	518.288	518.647	O=C1[C@@]2(C)[C@@]([C@H]3C[C@]4([H])[C@]2([H])[C@@H](O)C[C@@]5(C)[C@]4(CC[C@]5([H])[C@@H]([C@]6([H])OC(C(CO)=C(C)C6)=O)C)[H])(O3)[C@@H](O)[C@@H](OC)C1	InChI=1S/C29H42O8/c1-13-8-20(36-26(34)16(13)12-30)14(2)17-6-7-18-15-9-23-29(37-23)25(33)21(35-5)10-22(32)28(29,4)24(15)19(31)11-27(17,18)3/h14-15,17-21,23-25,30-31,33H,6-12H2,1-5H3/t14-,15-,17+,18-,19-,20+,21?,23+,24+,25-,27+,28+,29-/m0/s1	JQCUJCHQCVDHTF-JUDUKCIVSA-N	Physalis longifolia	2011	10.1021/np200635r	38
50	Withalongolide P	C28H40O8	504.272	504.62	O=C1[C@@]2(CO)[C@@]([C@H]3C[C@]4([H])[C@]2([H])CC[C@@]5(C)[C@]4(CC[C@]5([H])[C@@H]([C@]6([H])OC(C(CO)=C(C)C6)=O)C)[H])(O3)[C@@H](O)[C@@H](O)C1	InChI=1S/C28H40O8/c1-13-8-21(35-25(34)16(13)11-29)14(2)17-4-5-18-15-9-23-28(36-23)24(33)20(31)10-22(32)27(28,12-30)19(15)6-7-26(17,18)3/h14-15,17-21,23-24,29-31,33H,4-12H2,1-3H3/t14-,15-,17+,18-,19-,20-,21+,23+,24-,26+,27-,28-/m0/s1	BQIHMUXBKLJGPU-IVFYTCICSA-N	Physalis longifolia	2012	10.1002/chin.201312192	39
51	27-O-acetyl-viscosalactone B	C30H42O8	530.288	530.658	O=C1[C@@]2(C)[C@@]([C@H]3C[C@]4([H])[C@]2([H])CC[C@@]5(C)[C@]4(CC[C@]5([H])[C@@H]([C@]6([H])OC(C(COC(C)=O)=C(C)C6)=O)C)[H])(O3)[C@@H](O)[C@@H](O)C1	InChI=1S/C30H42O8/c1-14-10-23(37-27(35)18(14)13-36-16(3)31)15(2)19-6-7-20-17-11-25-30(38-25)26(34)22(32)12-24(33)29(30,5)21(17)8-9-28(19,20)4/h15,17,19-23,25-26,32,34H,6-13H2,1-5H3/t15-,17-,19+,20-,21-,22-,23+,25+,26-,28+,29-,30-/m0/s1	HCNOKOYJNBADCL-HQQKMCBUSA-N	Withania aristata	2012	10.1016/j.ejmech.2012.05.032	42
52	Physaminilide D	C28H40O8	504.272	504.62	O=C1[C@@]2(C)[C@@]([C@H]3C[C@]4([H])[C@]2([H])CC[C@@]5(C)[C@@]4(O)[C@@H](O)C[C@]5([H])[C@@H]([C@]6([H])OC(C(C)=C(C)C6)=O)C)(O3)[C@@H](O)[C@@H](O)C1	InChI=1S/C28H40O8/c1-12-8-19(35-24(33)13(12)2)14(3)16-9-21(31)27(34)17-10-22-28(36-22)23(32)18(29)11-20(30)26(28,5)15(17)6-7-25(16,27)4/h14-19,21-23,29,31-32,34H,6-11H2,1-5H3/t14-,15-,16+,17+,18-,19+,21-,22+,23-,25+,26-,27-,28-/m0/s1	SBLXGIXFVHRWPG-KVUZLKRKSA-N	Physalis minima	2020	10.1039/d0ra04106h	56
53	Physaminilide E	C30H42O9	546.283	546.657	O=C1[C@@]2(C)[C@@]([C@H]3C[C@]4([H])[C@]2([H])CC[C@@]5(C)[C@@]4(O)[C@@H](OC(C)=O)C[C@]5([H])[C@@H]([C@]6([H])OC(C(C)=C(C)C6)=O)C)(O3)[C@@H](O)[C@@H](O)C1	InChI=1S/C30H42O9/c1-13-9-21(38-26(35)14(13)2)15(3)18-10-23(37-16(4)31)29(36)19-11-24-30(39-24)25(34)20(32)12-22(33)28(30,6)17(19)7-8-27(18,29)5/h15,17-21,23-25,32,34,36H,7-12H2,1-6H3/t15-,17-,18+,19+,20-,21+,23?,24+,25-,27+,28-,29-,30-/m0/s1	DLGJWPFVIGOBQN-ZLGQTPMBSA-N	Physalis minima	2020	10.1039/d0ra04106h	56
54	Withalongolide G	C28H40O11S	584.229	584.677	O=C1[C@@]2(CO)[C@@]([C@H]3C[C@]4([H])[C@]2([H])CC[C@@]5(C)[C@]4(CC[C@]5([H])[C@@H]([C@]6([H])OC(C(CO)=C(C)C6)=O)C)[H])(O3)[C@@H](O)[C@@H](OS(=O)(O)=O)C1	InChI=1S/C28H40O11S/c1-13-8-20(37-25(33)16(13)11-29)14(2)17-4-5-18-15-9-23-28(38-23)24(32)21(39-40(34,35)36)10-22(31)27(28,12-30)19(15)6-7-26(17,18)3/h14-15,17-21,23-24,29-30,32H,4-12H2,1-3H3,(H,34,35,36)/t14-,15-,17+,18-,19-,20+,21-,23+,24-,26+,27-,28-/m0/s1	COBSTJNYJHEYIM-WQWZRYHASA-N	Physalis longifolia	2011	10.1021/np200635r	38
55	2,3-Dihydro-3β-O-sulfate withacnistin	C30H42O11S	610.245	610.715	O=C1[C@@]2(C)[C@@]([C@H]3C[C@]4([H])[C@]2([H])CC[C@@]5(COC(C)=O)[C@@]4([H])CC[C@]5([H])[C@@H]([C@]6([H])OC(C(C)=C(C)C6)=O)C)(O3)[C@@H](O)[C@@H](OS(=O)(O)=O)C1	InChI=1S/C30H42O11S/c1-14-10-22(39-27(34)15(14)2)16(3)19-6-7-21-18-11-25-30(40-25)26(33)23(41-42(35,36)37)12-24(32)28(30,5)20(18)8-9-29(19,21)13-38-17(4)31/h16,18-23,25-26,33H,6-13H2,1-5H3,(H,35,36,37)/t16-,18+,19+,20-,21-,22+,23?,25+,26-,28-,29-,30-/m0/s1	TYGULOJKEVSVDB-SCLOXEHJSA-N	Acnistus arborescens	2019	10.1016/j.phytol.2018.12.001	57
56	(20R,22R)-16β-Acetoxy-3β,4β;5β,6β-diepoxy-12β,20-dihydroxy-1-oxowith-24-enolide	C30H40O9	544.267	544.641	O=C1[C@@]2(C)[C@@]([C@H]3C[C@]4([H])[C@]2([H])C[C@@H](O)[C@@]5(C)[C@]4(C[C@H](OC(C)=O)[C@]5([H])[C@@]([C@]6([H])OC(C(C)=C(C)C6)=O)(C)O)[H])(O3)[C@@H]7[C@@H](O7)C1	InChI=1S/C30H40O9/c1-12-7-22(38-26(34)13(12)2)29(6,35)24-18(36-14(3)31)9-16-15-8-23-30(39-23)25-19(37-25)11-21(33)28(30,5)17(15)10-20(32)27(16,24)4/h15-20,22-25,32,35H,7-11H2,1-6H3/t15-,16-,17-,18?,19-,20+,22+,23+,24-,25-,27+,28-,29-,30-/m0/s1	LBOJKFRDTKZSKQ-QSKMEKSDSA-N	Acnistus arborescens	2010	10.1021/np100201p	36
57	Tubocaapsanolide MAP	C29H40O7	500.277	500.632	O=C1[C@@]2(C)[C@@]([C@H]3C[C@]4([H])[C@]2([H])CC[C@@]5(C)[C@]4(C[C@@H](O6)[C@]56[C@@H]([C@]7([H])OC(C(C)=C(C)C7)=O)C)[H])(O3)[C@@H](O)[C@H](OC)C1	InChI=1S/C29H40O7/c1-13-9-19(34-25(32)14(13)2)15(3)28-23(35-28)11-18-16-10-22-29(36-22)24(31)20(33-6)12-21(30)27(29,5)17(16)7-8-26(18,28)4/h15-20,22-24,31H,7-12H2,1-6H3/t15-,16-,17+,18+,19-,20?,22-,23-,24+,26+,27+,28-,29+/m1/s1	YFSJUKZIQJQSIU-DOOPOXGISA-N	Tubocapsicum anomalum	2020	10.1016/j.steroids.2020.108734	58
58	2,3-Dihydrotubocapsanolide A	C28H38O6	470.267	470.606	O=C1[C@@]2(C)[C@@]([C@H]3C[C@]4([H])[C@]2([H])CC[C@@]5(C)[C@@]4([H])C[C@@H](O6)[C@]56[C@@H]([C@]7([H])OC(C(C)=C(C)C7)=O)C)(O3)[C@@H](O)CC1	InChI=1S/C28H38O6/c1-13-10-19(32-24(31)14(13)2)15(3)27-23(33-27)12-18-16-11-22-28(34-22)21(30)7-6-20(29)26(28,5)17(16)8-9-25(18,27)4/h15-19,21-23,30H,6-12H2,1-5H3/t15-,16-,17+,18+,19-,21+,22-,23-,25+,26+,27-,28-/m1/s1	WLUVJXMNBBVJAZ-KAUDDYPASA-N	Tubocapsicum anomalum	2018	10.1016/j.bioorg.2018.08.034	40
59	3β-Ethoxy-2,3-dihydrotubocapsanolide A	C30H42O7	514.293	514.659	O=C1[C@@]2(C)[C@@]([C@H]3C[C@]4([H])[C@]2([H])CC[C@@]5(C)[C@@]4([H])C[C@@H](O6)[C@]56[C@@H]([C@]7([H])OC(C(C)=C(C)C7)=O)C)(O3)[C@@H](O)[C@@H](OCC)C1	InChI=1S/C30H42O7/c1-7-34-21-13-22(31)28(6)18-8-9-27(5)19(17(18)11-23-30(28,37-23)25(21)32)12-24-29(27,36-24)16(4)20-10-14(2)15(3)26(33)35-20/h16-21,23-25,32H,7-13H2,1-6H3/t16-,17-,18+,19+,20-,21?,23-,24-,25+,27+,28+,29-,30+/m1/s1	SNHMOXMIAVJDJE-MWRITKCPSA-N	Tubocapsicum anomalum	2018	10.1016/j.bioorg.2018.08.034	40
60	15α-acetoxy-5,6β:22,26:24,25-triepoxy-26α-hydroxy-3β-methoxy 4β-hydroxyergost-1-one	C31H46O9	562.314	562.7	O=C1[C@@]2(C)[C@@]([C@H]3C[C@]4([H])[C@]2([H])CC[C@@]5(C)[C@@]4([H])[C@@H](OC(C)=O)C[C@]5([H])[C@@H]([C@]6([H])O[C@@H](O)[C@@](C)(O7)[C@]7(C)C6)C)(O3)[C@@H](O)[C@@H](OC)C1	InChI=1S/C31H46O9/c1-14(21-13-28(4)30(6,40-28)26(35)38-21)18-11-19(37-15(2)32)24-16-10-23-31(39-23)25(34)20(36-7)12-22(33)29(31,5)17(16)8-9-27(18,24)3/h14,16-21,23-26,34-35H,8-13H2,1-7H3/t14-,16+,17-,18+,19?,20?,21+,23+,24+,25-,26+,27+,28-,29-,30+,31-/m0/s1	ASUAZCDLFWBREQ-LFBVCRNGSA-N	Biotransformations of physapubescin	2017	10.1007/s11418-016-1068-z	59
61	Peruvianolide E	C31H46O9	562.314	562.7	O=C1[C@@]2(C)[C@@]([C@H]3C[C@]4([H])[C@]2([H])CC[C@@]5(C)[C@@]4([H])[C@@H](OC(C)=O)C[C@]5([H])[C@@H]([C@]6([H])O[C@@H](O)[C@]7(C)[C@@](C)(O7)C6)C)(O3)[C@@H](O)[C@@H](OC)C1	InChI=1S/C31H46O9/c1-14(21-13-28(4)30(6,40-28)26(35)38-21)18-11-19(37-15(2)32)24-16-10-23-31(39-23)25(34)20(36-7)12-22(33)29(31,5)17(16)8-9-27(18,24)3/h14,16-21,23-26,34-35H,8-13H2,1-7H3/t14-,16+,17-,18+,19?,20?,21+,23+,24+,25-,26+,27+,28-,29-,30+,31-/m0/s1	ASUAZCDLFWBREQ-LFBVCRNGSA-N	Physalis peruviana	2019	10.1016/j.bioorg.2019.03.051	28
62	Physapubescin L	C33H48O11	620.32	620.736	O=C1[C@@]2(C)[C@@]([C@H]3C[C@]4([H])[C@]2([H])CC[C@@]5(C)[C@@]4([H])[C@@H](OC(C)=O)[C@@H](OC(C)=O)[C@]5([H])[C@@H]([C@]6([H])O[C@@H](O)[C@@](C)(O7)[C@]7(C)C6)C)(O3)[C@@H](O)[C@@H](OC)C1	InChI=1S/C33H48O11/c1-14(20-13-30(5)32(7,44-30)28(38)42-20)23-25(40-15(2)34)26(41-16(3)35)24-17-11-22-33(43-22)27(37)19(39-8)12-21(36)31(33,6)18(17)9-10-29(23,24)4/h14,17-20,22-28,37-38H,9-13H2,1-8H3/t14-,17-,18+,19?,20-,22-,23+,24-,25?,26?,27+,28-,29-,30+,31+,32-,33+/m1/s1	ILLQPWAMTHRMBD-TUXFWAJQSA-N	Physalis pubescens L.	2020	10.1016/j.fitote.2020.104692	51
63	Physapubescin M	C34H50O11	634.335	634.763	O=C1[C@@]2(C)[C@@]([C@H]3C[C@]4([H])[C@]2([H])CC[C@@]5(C)[C@@]4([H])[C@@H](OC(C)=O)[C@@H](OC(C)=O)[C@]5([H])[C@@H]([C@]6([H])O[C@@H](OC)[C@@](C)(O7)[C@]7(C)C6)C)(O3)[C@@H](O)[C@@H](OC)C1	InChI=1S/C34H50O11/c1-15(21-14-31(5)33(7,45-31)29(40-9)43-21)24-26(41-16(2)35)27(42-17(3)36)25-18-12-23-34(44-23)28(38)20(39-8)13-22(37)32(34,6)19(18)10-11-30(24,25)4/h15,18-21,23-29,38H,10-14H2,1-9H3/t15-,18-,19+,20?,21-,23-,24+,25-,26?,27?,28+,29?,30-,31+,32+,33-,34+/m1/s1	GQZFWSPPZBDVFR-XIVBFRKOSA-N	Physalis pubescens L.	2020	10.1016/j.fitote.2020.104692	51
64	15α-Acetoxy-5,6β:22,26-diepoxy-4β,24β,25α,26(α, β)-tetrahydroxyergost-3β-methoxy-1-one	C31H48O10	580.325	580.715	O=C1[C@@]2(C)[C@@]([C@H]3C[C@]4([H])[C@]2([H])CC[C@@]5(C)[C@@]4([H])[C@@H](OC(C)=O)C[C@]5([H])[C@@H]([C@]6([H])OC(O)[C@@](C)(O)[C@@](O)(C)C6)C)(O3)[C@@H](O)[C@@H](OC)C1	InChI=1S/C31H48O10/c1-14(21-13-28(4,36)30(6,37)26(35)40-21)18-11-19(39-15(2)32)24-16-10-23-31(41-23)25(34)20(38-7)12-22(33)29(31,5)17(16)8-9-27(18,24)3/h14,16-21,23-26,34-37H,8-13H2,1-7H3/t14-,16+,17-,18+,19?,20?,21+,23+,24+,25-,26?,27+,28+,29-,30+,31-/m0/s1	CPZNJEDBDSVGSD-VTAVSXTGSA-N	Biotransformations of physapubescin	2017	10.1007/s11418-016-1068-z	59
65	(20S,22R,24R,25S,26R/S)-15α-Acetoxy-5,6β:22,26-diepoxy-3β,4β,24,25,26-pentahydroxyergost-1-one	C30H46O10	566.309	566.688	O=C1[C@@]2(C)[C@@]([C@H]3C[C@]4([H])[C@]2([H])CC[C@@]5(C)[C@]4([C@@H](OC(C)=O)C[C@]5([H])[C@@H]([C@]6([H])OC(O)[C@@](C)(O)[C@@](O)(C)C6)C)[H])(O3)[C@@H](O)[C@@H](O)C1	InChI=1S/C30H46O10/c1-13(20-12-27(4,36)29(6,37)25(35)39-20)17-10-19(38-14(2)31)23-15-9-22-30(40-22)24(34)18(32)11-21(33)28(30,5)16(15)7-8-26(17,23)3/h13,15-20,22-25,32,34-37H,7-12H2,1-6H3/t13-,15+,16-,17+,18-,19?,20+,22+,23+,24-,25?,26+,27+,28-,29+,30-/m0/s1	DBMDKBARRNIHCU-AFHJDVOASA-N	Physalis pubescens L.	2016	10.1039/c6ra07031k	49
66	3α-(Uracil-1-yl)-2,3-dihydrowithaferin A	C32H42N2O8	582.294	582.694	O=C1[C@@]2(C)[C@@]([C@H]3C[C@]4([H])[C@]2([H])CC[C@@]5(C)[C@]4(CC[C@]5([H])[C@@H]([C@]6([H])OC(C(CO)=C(C)C6)=O)C)[H])(O3)[C@@H](O)[C@H](N7C(NC(C=C7)=O)=O)C1	InChI=1S/C32H42N2O8/c1-15-11-23(41-28(39)18(15)14-35)16(2)19-5-6-20-17-12-25-32(42-25)27(38)22(34-10-8-26(37)33-29(34)40)13-24(36)31(32,4)21(17)7-9-30(19,20)3/h8,10,16-17,19-23,25,27,35,38H,5-7,9,11-14H2,1-4H3,(H,33,37,40)/t16-,17-,19+,20-,21-,22+,23+,25+,27-,30+,31-,32-/m0/s1	NQVNBCSTEGPDTK-OPMYPFGQSA-N	Withania somnifera	2011	10.1016/j.phytochem.2010.12.020	60
67	3β-(Uracil-1-yl)-2,3-dihydrowithaferin A	C32H42N2O8	582.294	582.694	O=C1[C@@]2(C)[C@@]([C@H]3C[C@]4([H])[C@]2([H])CC[C@@]5(C)[C@]4(CC[C@]5([H])[C@@H]([C@]6([H])OC(C(CO)=C(C)C6)=O)C)[H])(O3)[C@@H](O)[C@@H](N7C(NC(C=C7)=O)=O)C1	InChI=1S/C32H42N2O8/c1-15-11-23(41-28(39)18(15)14-35)16(2)19-5-6-20-17-12-25-32(42-25)27(38)22(34-10-8-26(37)33-29(34)40)13-24(36)31(32,4)21(17)7-9-30(19,20)3/h8,10,16-17,19-23,25,27,35,38H,5-7,9,11-14H2,1-4H3,(H,33,37,40)/t16-,17-,19+,20-,21-,22-,23+,25+,27-,30+,31-,32-/m0/s1	NQVNBCSTEGPDTK-IBOJRDGTSA-N	Withania somnifera	2011	10.1016/j.phytochem.2010.12.020	60
68	3β-(Adenin-9-yl)-2,3-dihydrowithaferin A	C33H43N5O6	605.321	605.736	O=C1[C@@]2(C)[C@@]([C@H]3C[C@]4([H])[C@]2([H])CC[C@@]5(C)[C@]4(CC[C@]5([H])[C@@H]([C@]6([H])OC(C(CO)=C(C)C6)=O)C)[H])(O3)[C@@H](O)[C@@H](N7C=NC8=C(N)N=CN=C87)C1	InChI=1S/C33H43N5O6/c1-15-9-23(43-30(42)18(15)12-39)16(2)19-5-6-20-17-10-25-33(44-25)27(41)22(38-14-37-26-28(34)35-13-36-29(26)38)11-24(40)32(33,4)21(17)7-8-31(19,20)3/h13-14,16-17,19-23,25,27,39,41H,5-12H2,1-4H3,(H2,34,35,36)/t16-,17-,19+,20-,21-,22-,23+,25+,27-,31+,32-,33-/m0/s1	XMNZCJNFFQHXDQ-DNNHTGRASA-N	Withania somnifera	2011	10.1016/j.phytochem.2010.12.020	60
69	Isowithalongolide A	C28H38O7	486.262	486.605	O=C1[C@@]2(CO3)[C@@]([C@H]4C[C@]5([H])[C@]2([H])CC[C@@]6(C)[C@@]5([H])CC[C@]6([H])[C@H](C)[C@]7([H])OC(C(CO)=C(C)C7)=O)(O4)[C@@H](O)C3C1	InChI=1S/C28H38O7/c1-13-8-20(34-25(32)16(13)11-29)14(2)17-4-5-18-15-9-23-28(35-23)24(31)21-10-22(30)27(28,12-33-21)19(15)6-7-26(17,18)3/h14-15,17-21,23-24,29,31H,4-12H2,1-3H3/t14-,15-,17+,18-,19-,20+,21?,23+,24-,26+,27-,28-/m0/s1	GNFOVRLMTASZKG-LSVBTUCASA-N	Artifacts produced	2013	10.1021/np400296s	61
70	Isowithalongolide B	C28H38O6	470.267	470.606	O=C1[C@@]2(CO3)[C@@]([C@H]4C[C@]5([H])[C@]2([H])CC[C@@]6(C)[C@@]5([H])CC[C@]6([H])[C@H](C)[C@]7([H])OC(C(C)=C(C)C7)=O)(O4)[C@@H](O)C3C1	InChI=1S/C28H38O6/c1-13-9-20(33-25(31)14(13)2)15(3)17-5-6-18-16-10-23-28(34-23)24(30)21-11-22(29)27(28,12-32-21)19(16)7-8-26(17,18)4/h15-21,23-24,30H,5-12H2,1-4H3/t15-,16-,17+,18-,19-,20+,21?,23+,24-,26+,27-,28-/m0/s1	HBEFQQYUGOQHLZ-LDFAENLKSA-N	Artifacts produced	2013	10.1021/np400296s	61
71	2,3-Dihydro-3β-methoxywithalongolide B	C29H42O8	518.288	518.647	O=C1[C@@]2(CO)[C@@]([C@H]3C[C@]4([H])[C@]2([H])CC[C@@]5(C)[C@@]4([H])CC[C@]5([H])[C@@](C)(O)[C@]6([H])OC(C(C)=C(C)C6)=O)(O3)[C@@H](O)[C@@H](OC)C1	InChI=1S/C29H42O8/c1-14-10-22(36-25(33)15(14)2)27(4,34)20-7-6-17-16-11-23-29(37-23)24(32)19(35-5)12-21(31)28(29,13-30)18(16)8-9-26(17,20)3/h16-20,22-24,30,32,34H,6-13H2,1-5H3/t16-,17-,18-,19?,20-,22+,23+,24-,26-,27+,28-,29-/m0/s1	UPIZSVQZKWFTDL-IVZIZDDCSA-N	Artifacts produced	2013	10.1021/np400296s	61
72	14α,15α-Epoxywithaferin A	C28H36O7	484.246	484.589	C[C@@]12[C@@]([C@H]3C[C@]4([H])[C@]2([H])CC[C@@]5(C)[C@]4(O6)[C@H]6C[C@]5([H])[C@@H]([C@]7([H])OC(C(CO)=C(C)C7)=O)C)(O3)[C@@H](O)C=CC1=O	InChI=1S/C28H36O7/c1-13-9-19(33-24(32)15(13)12-29)14(2)17-10-22-27(34-22)18-11-23-28(35-23)21(31)6-5-20(30)26(28,4)16(18)7-8-25(17,27)3/h5-6,14,16-19,21-23,29,31H,7-12H2,1-4H3/t14-,16-,17+,18+,19+,21-,22+,23+,25+,26-,27+,28+/m0/s1	YNRHYTWQHBSYNY-PGOUVEPJSA-N	Withania somnifera	2010, 2016	10.1016/j.phytochem.2010.08.019 and 10.1021/acs.jnatprod.5b00648	41, 62	5β,6β,14α,15α-Diepoxy-4β,27-dihydroxy-1-oxowitha-2,24-dienolide
73	Withaoxylactone	C28H38O8	502.257	502.604	C[C@@]12[C@@]([C@H]3C[C@]4([H])[C@]2([H])CC[C@@]5(C)[C@]4(O6)[C@H]6C[C@]5([H])[C@@H]([C@]7([H])OC(C(CO)=C(C)C7)=O)C)(O3)[C@@H](O)[C@@H](O)CC1=O	InChI=1S/C28H38O8/c1-12-7-19(34-24(33)14(12)11-29)13(2)16-8-21-27(35-21)17-9-22-28(36-22)23(32)18(30)10-20(31)26(28,4)15(17)5-6-25(16,27)3/h13,15-19,21-23,29-30,32H,5-11H2,1-4H3/t13-,15-,16+,17+,18-,19+,21+,22+,23-,25+,26-,27+,28-/m0/s1	DVMRXXYECRHVNS-HOFBZHCHSA-N	Withania somnifera	2016, 1996	10.1021/acs.jnatprod.5b00648 and 10.3987/com-94-6935	62, 63	withaoxylactone
74	15α-Acetoxyphysachenolide C	C32H42O11	602.273	602.677	O=C1[C@@]2(C)[C@@]([C@H]3C[C@]4([H])[C@]2([H])CC[C@@]5(COC(C)=O)[C@@]4(O)[C@@H](OC(C)=O)C[C@@]5(O)[C@]([C@]6([H])OC(C(C)=C(C)C6)=O)(O)C)(O3)CC=C1	InChI=1S/C32H42O11/c1-16-12-23(42-26(36)17(16)2)28(6,37)31(38)14-25(41-19(4)34)32(39)21-13-24-30(43-24)10-7-8-22(35)27(30,5)20(21)9-11-29(31,32)15-40-18(3)33/h7-8,20-21,23-25,37-39H,9-15H2,1-6H3/t20-,21+,23+,24+,25?,27-,28-,29-,30+,31+,32-/m0/s1	ZUTVFNRARULPEX-IPKKHYQUSA-N	Physalis crassifolia	2016	10.1021/acs.jnatprod.5b00911	76
75	Withaperuvin L	C28H38O8	502.257	502.604	O=C1[C@@]2(C)[C@@]([C@H]3[C@H](O)C4C2CC[C@@]5(C)[C@@]4(O)CC[C@@]5(O)[C@@](C)(O)[C@@H]6OC(C(C)=C(C)C6)=O)(O3)CC=C1	InChI=1S/C28H38O8/c1-14-13-18(35-22(31)15(14)2)25(5,32)28(34)12-11-26(33)19-16(8-10-23(26,28)3)24(4)17(29)7-6-9-27(24)21(36-27)20(19)30/h6-7,16,18-21,30,32-34H,8-13H2,1-5H3/t16?,18-,19?,20-,21-,23+,24+,25+,26-,27-,28+/m1/s1	IJWKMXZGBMUBFR-QNFQKLFKSA-N	Physalis peruviana	2012	10.1016/j.steroids.2011.09.011	64
76	Withaperuvin L 7-acetae	C30H40O9	544.267	544.641	O=C1[C@@]2(C)[C@@]([C@H]3[C@H](OC(C)=O)C4C2CC[C@@]5(C)[C@@]4(O)CC[C@@]5(O)[C@@](C)(O)[C@@H]6OC(C(C)=C(C)C6)=O)(O3)CC=C1	InChI=1S/C30H40O9/c1-15-14-20(38-24(33)16(15)2)27(6,34)30(36)13-12-28(35)21-18(9-11-25(28,30)4)26(5)19(32)8-7-10-29(26)23(39-29)22(21)37-17(3)31/h7-8,18,20-23,34-36H,9-14H2,1-6H3/t18?,20-,21?,22?,23-,25+,26+,27+,28-,29-,30+/m1/s1	FVSOXBFNFKQFFE-LAHAPODUSA-N	Acetylation of Withaperuvin L	2012	10.1016/j.steroids.2011.09.011	64
77	23β-Hydroxywithanolide E	C28H38O8	502.257	502.604	O=C1[C@@]2(C)[C@@]([C@H]3C[C@]4([H])[C@]2([H])CC[C@@]5(C)[C@@]4(O)CC[C@@]5(O)[C@@]([C@]6([H])OC(C(C)=C(C)[C@@H]6O)=O)(C)O)(O3)CC=C1	InChI=1S/C28H38O8/c1-14-15(2)22(31)35-21(20(14)30)25(5,32)28(34)12-11-26(33)17-13-19-27(36-19)9-6-7-18(29)24(27,4)16(17)8-10-23(26,28)3/h6-7,16-17,19-21,30,32-34H,8-13H2,1-5H3/t16-,17+,19+,20-,21+,23-,24-,25-,26+,27+,28-/m0/s1	ITWIKFICVAIMTA-BKBFHZDGSA-N	Physalis peruviana	2017	10.1021/acs.jnatprod.6b01129	32
78	Physagulide S	C30H40O10	560.262	560.64	O=C1[C@@]2(C)[C@@]([C@H]3C[C@]4([H])[C@]2([H])CC[C@@]5(C)[C@]4(O)[C@@H](OC(C)=O)C[C@@]5(O)[C@@H]([C@]6([H])OC(C(C)=C(C)[C@H]6O)=O)C)(O3)[C@@H](O)C=C1	InChI=1S/C30H40O10/c1-13-14(2)25(35)39-24(23(13)34)15(3)28(36)12-22(38-16(4)31)29(37)18-11-21-30(40-21)20(33)8-7-19(32)27(30,6)17(18)9-10-26(28,29)5/h7-8,15,17-18,20-24,33-34,36-37H,9-12H2,1-6H3/t15-,17+,18-,20+,21-,22?,23-,24+,26-,27+,28-,29-,30-/m1/s1	RJQXTJUOHJCRJD-IEBKWCHOSA-N	Physalis angulata var. villosa	2018	10.1016/j.jpba.2017.12.047	43
79	Physagulide P	C30H40O9	544.267	544.641	O=C1[C@@]2(C)[C@@]([C@H]3CC4C2CC[C@@]5(C)[C@]4(O)[C@@H](OC(C)=O)C[C@@]5(O)[C@H](C)[C@@H]6OC(C(C)=C(C)C6)=O)(O3)[C@@H](O)C=C1	InChI=1S/C30H40O9/c1-14-11-20(38-25(34)15(14)2)16(3)28(35)13-24(37-17(4)31)29(36)19-12-23-30(39-23)22(33)8-7-21(32)27(30,6)18(19)9-10-26(28,29)5/h7-8,16,18-20,22-24,33,35-36H,9-13H2,1-6H3/t16-,18?,19?,20-,22+,23-,24?,26-,27+,28-,29-,30-/m1/s1	DKPDEMYHWMITRT-WFPXYRNASA-N	Physalis angulata	2018	10.1080/14786419.2017.1338281	65
80	Physaliolide J	C28H38O8	502.257	502.604	C[C@@]12[C@@]([C@H]3C[C@]4([H])[C@]2([H])CC[C@@]5(C)[C@]4(O)[C@@H](O)C[C@@]5(O)[C@@H]([C@]6([H])OC(C(C)=C(C)C6)=O)C)(O3)[C@@H](O)C=CC1=O	InChI=1S/C28H38O8/c1-13-10-18(35-23(32)14(13)2)15(3)26(33)12-21(31)27(34)17-11-22-28(36-22)20(30)7-6-19(29)25(28,5)16(17)8-9-24(26,27)4/h6-7,15-18,20-22,30-31,33-34H,8-12H2,1-5H3/t15-,16+,17-,18-,20+,21+,22-,24-,25+,26-,27-,28-/m1/s1	UJVKDPXJRSIQLD-PDKCCHAZSA-N	Physalis minima	2020	10.1016/j.fitote.2019.104413	69
81	24,25-Dihydrowithanolide E	C28H40O7	488.277	488.621	O=C1[C@@]2(C)[C@@]([C@H]3C[C@]4([H])[C@]2([H])CC[C@@]5(C)[C@@]4(O)CC[C@@]5(O)[C@@]([C@]6([H])OC([C@H](C)[C@@H](C)C6)=O)(C)O)(O3)CC=C1	InChI=1S/C28H40O7/c1-15-13-20(34-22(30)16(15)2)25(5,31)28(33)12-11-26(32)18-14-21-27(35-21)9-6-7-19(29)24(27,4)17(18)8-10-23(26,28)3/h6-7,15-18,20-21,31-33H,8-14H2,1-5H3/t15-,16+,17-,18+,20+,21+,23-,24-,25-,26+,27+,28-/m0/s1	RZIFJKFUVNLGTP-ZBCVZSEUSA-N	Physalis peruviana	2017	10.1021/acs.jnatprod.6b01129	32
82	17-Epi-philadelphicalactone A	C28H40O7	488.277	488.621	O=C1[C@@]2(C)[C@@]([C@H]3C[C@]4([H])[C@]2([H])CC[C@@]5(C)[C@@]4([H])CC[C@@]5(O)[C@@]([C@]6([H])OC([C@H](C)[C@@H](C)C6)=O)(C)O)(O3)[C@@H](O)C=C1	InChI=1S/C28H40O7/c1-14-12-21(34-23(31)15(14)2)26(5,32)27(33)11-9-17-16-13-22-28(35-22)20(30)7-6-19(29)25(28,4)18(16)8-10-24(17,27)3/h6-7,14-18,20-22,30,32-33H,8-13H2,1-5H3/t14-,15+,16-,17-,18-,20-,21+,22+,24-,25-,26-,27-,28+/m0/s1	ODFGLJQOCBLUPX-GZXNCUENSA-N	Physalis philadelphica	2018	10.1016/j.phytochem.2018.04.018	44
83	Physagulide R	C30H38O10	558.246	558.624	O=C1[C@@]2(C)[C@@]([C@H]3C[C@]4([H])[C@]2([H])CC[C@@]5(C)[C@]4(O)[C@@H](OC(C)=O)[C@H]6[C@@]5(O6)[C@@H]([C@]7([H])OC(C(C)=C(CO)C7)=O)C)(O3)[C@@H](O)C=C1	InChI=1S/C30H38O10/c1-13-16(12-31)10-19(38-25(13)35)14(2)29-24(40-29)23(37-15(3)32)28(36)18-11-22-30(39-22)21(34)7-6-20(33)27(30,5)17(18)8-9-26(28,29)4/h6-7,14,17-19,21-24,31,34,36H,8-12H2,1-5H3/t14-,17+,18-,19-,21+,22-,23?,24+,26+,27+,28-,29+,30-/m1/s1	RXKGLXRHGVGEHZ-BXKLPWCWSA-N	Physalis angulata var. villosa	2018	10.1016/j.jpba.2017.12.047	43
84	Physangulatin I	C31H42O9	558.283	558.668	O=C1[C@@]2(C)[C@@]([C@H]3C[C@]4([H])[C@]2([H])CC[C@@]5(C)[C@]4(O)[C@@H](OC(C)=O)[C@H](O6)[C@@]56[C@@H]([C@]7([H])OC(C(C)=C(C)C7)=O)C)(O3)C[C@H](OC)C1	InChI=1S/C31H42O9/c1-14-10-21(38-26(34)15(14)2)16(3)31-25(40-31)24(37-17(4)32)30(35)20-12-23-29(39-23)13-18(36-7)11-22(33)28(29,6)19(20)8-9-27(30,31)5/h16,18-21,23-25,35H,8-13H2,1-7H3/t16-,18?,19+,20-,21-,23-,24?,25+,27+,28+,29-,30-,31+/m1/s1	QEOZKNYHRLRPDA-RFJVSBDHSA-N	Physalis angulata L.	2016	10.1021/acs.jnatprod.6b00094	66
85	Physaminilide F	C30H40O10	560.262	560.64	O=C1[C@@]2(C)[C@@]([C@H]3C[C@]4([H])[C@]2([H])CC[C@@]5(C)[C@@]4(O)[C@@H](OC(C)=O)[C@H](O6)[C@@]56[C@@H]([C@]7([H])OC(C(C)=C(C)C7)=O)C)(O3)[C@@H](O)[C@@H](O)C1	InChI=1S/C30H40O10/c1-12-9-19(38-25(35)13(12)2)14(3)29-24(40-29)23(37-15(4)31)28(36)17-10-21-30(39-21)22(34)18(32)11-20(33)27(30,6)16(17)7-8-26(28,29)5/h14,16-19,21-24,32,34,36H,7-11H2,1-6H3/t14-,16+,17-,18+,19-,21-,22+,23?,24+,26+,27+,28+,29+,30+/m1/s1	XMWJYOMTAVLSMS-DYFZRAGFSA-N	Physalis minima	2020	10.1039/d0ra04106h	56
86	Withaperuvin K	C29H42O10	550.278	550.645	O=C1[C@@]2(C)[C@@]([C@H]3CC4C2CC[C@@]5(C)[C@@]4(O)CC[C@@]5(O)[C@@](C)(O)[C@@H]6OC(C(C)=C(CO)C6)=O)(O3)[C@@H](O)[C@@H](OC)C1	InChI=1S/C29H42O10/c1-14-15(13-30)10-20(38-23(14)33)26(4,34)28(36)9-8-27(35)17-11-21-29(39-21)22(32)18(37-5)12-19(31)25(29,3)16(17)6-7-24(27,28)2/h16-18,20-22,30,32,34-36H,6-13H2,1-5H3/t16?,17?,18?,20-,21-,22+,24+,25+,26+,27-,28+,29+/m1/s1	WTZAMQVJDAEWKD-JXFRDCFHSA-N	Physalis peruviana	2012	10.1016/j.steroids.2011.09.011	64
87	3-Methoxy-2,3-dihydrophysagulide P	C31H44O10	576.293	576.683	O=C1[C@@]2(C)[C@@]([C@H]3C[C@]4([H])[C@]2([H])CC[C@@]5(C)[C@]4(O)[C@@H](OC(C)=O)C[C@@]5(O)[C@@H]([C@]6([H])OC(C(C)=C(C)C6)=O)C)(O3)[C@@H](O)[C@H](OC)C1	InChI=1S/C31H44O10/c1-14-10-20(40-26(35)15(14)2)16(3)29(36)13-24(39-17(4)32)30(37)19-11-23-31(41-23)25(34)21(38-7)12-22(33)28(31,6)18(19)8-9-27(29,30)5/h16,18-21,23-25,34,36-37H,8-13H2,1-7H3/t16-,18+,19-,20-,21?,23-,24?,25+,27-,28+,29-,30-,31+/m1/s1	BPDNWVPTADRYNL-IZPWMLBKSA-N	Physalis minima	2020	10.1016/j.fitote.2020.104728	55
88	Physaliolide H	C30H42O10	562.278	562.656	C[C@@]12[C@@]([C@H]3C[C@]4([H])[C@]2([H])CC[C@@]5(C)[C@]4(O)[C@@H](OC(C)=O)C[C@@]5(O)[C@@H]([C@]6([H])OC(C(C)=C(C)C6)=O)C)(O3)[C@@H](O)[C@@H](O)CC1=O	InChI=1S/C30H42O10/c1-13-9-20(39-25(35)14(13)2)15(3)28(36)12-23(38-16(4)31)29(37)18-10-22-30(40-22)24(34)19(32)11-21(33)27(30,6)17(18)7-8-26(28,29)5/h15,17-20,22-24,32,34,36-37H,7-12H2,1-6H3/t15-,17+,18-,19+,20-,22-,23?,24+,26-,27+,28-,29-,30+/m1/s1	NCDFMKDVRDMHRU-LJSNIXDGSA-N	Physalis minima	2020	10.1016/j.fitote.2019.104413	69
89	Physaliolide M	C30H42O11	578.273	578.655	C[C@@]12[C@@]([C@H]3C[C@]4([H])[C@]2([H])CC[C@@]5(C)[C@]4(O)[C@@H](OC(C)=O)C[C@@]5(O)[C@]([C@]6([H])OC(C(C)=C(C)C6)=O)(O)C)(O3)[C@@H](O)[C@@H](O)CC1=O	InChI=1S/C30H42O11/c1-13-9-20(40-24(35)14(13)2)27(6,36)28(37)12-22(39-15(3)31)29(38)17-10-21-30(41-21)23(34)18(32)11-19(33)26(30,5)16(17)7-8-25(28,29)4/h16-18,20-23,32,34,36-38H,7-12H2,1-6H3/t16-,17+,18-,20+,21+,22?,23-,25+,26-,27-,28-,29+,30-/m0/s1	NNCSKOFCISZXJJ-IUUIGAHZSA-N	Physalis minima	2020	10.1021/acsomega.0c00467	111
90	Physagulide U	C28H36O7	484.246	484.589	O=C1[C@@]2(C)[C@@]([C@H]3C[C@]4([H])[C@]2([H])CC[C@@]5(C)[C@]4(O)[C@@H](O)C=C5[C@@H]([C@]6([H])OC(C(C)=C(C)C6)=O)C)(O3)[C@@H](O)C=C1	InChI=1S/C28H36O7/c1-13-10-19(34-24(32)14(13)2)15(3)17-11-22(31)27(33)18-12-23-28(35-23)21(30)7-6-20(29)26(28,5)16(18)8-9-25(17,27)4/h6-7,11,15-16,18-19,21-23,30-31,33H,8-10,12H2,1-5H3/t15-,16-,18+,19+,21-,22-,23+,25+,26-,27+,28+/m0/s1	HHOKRFARMNBNSQ-QPWNZKFMSA-N	Physalis angulata var. villosa.	2018	10.1016/j.jpba.2017.12.047	43
91	Physagulide C	C30H38O9	542.252	542.625	O=C1[C@@]2(C)[C@@]([C@H]3C[C@]4([H])[C@]2([H])CC[C@@]5(C)[C@]4([C@@H](OC(C)=O)C=C5[C@@H]([C@]6([H])OC(C(C)=C(CO)C6)=O)C)O)(O3)[C@@H](O)C=C1	InChI=1S/C30H38O9/c1-14-17(13-31)10-21(38-26(14)35)15(2)19-11-24(37-16(3)32)29(36)20-12-25-30(39-25)23(34)7-6-22(33)28(30,5)18(20)8-9-27(19,29)4/h6-7,11,15,18,20-21,23-25,31,34,36H,8-10,12-13H2,1-5H3/t15-,18-,20+,21+,23-,24?,25+,27+,28-,29-,30+/m0/s1	NMWZMOSSULAGPI-USNPDJEGSA-N	Physalis angulata var. villosa.	2016	10.1039/c6ra08574a	67
92	Physagulide D	C30H38O9	542.252	542.625	O=C1[C@@]2(C)[C@@]([C@H]3C[C@]4([H])[C@]2([H])CC[C@@]5(C)[C@]4([C@@H](OC(C)=O)C=C5[C@@H]([C@]6([H])OC(C(C)=C(C)[C@@H]6O)=O)C)O)(O3)[C@@H](O)C=C1	InChI=1S/C30H38O9/c1-13-14(2)26(35)38-25(24(13)34)15(3)18-11-22(37-16(4)31)29(36)19-12-23-30(39-23)21(33)8-7-20(32)28(30,6)17(19)9-10-27(18,29)5/h7-8,11,15,17,19,21-25,33-34,36H,9-10,12H2,1-6H3/t15-,17-,19+,21-,22?,23+,24-,25-,27+,28-,29-,30+/m0/s1	DQTINFWFZGBEFW-UIMPCAERSA-N	Physalis angulata var. villosa.	2016	10.1039/c6ra08574a	67
93	4-Deoxyphyperunolide A	C28H36O6	468.251	468.59	O=C1[C@@]2(C)[C@@]([C@H]3C[C@]4([H])[C@]2([H])CC[C@@]5(C)[C@@]4(O)CC=C5[C@@]([C@]6([H])OC(C(C)=C(C)C6)=O)(C)O)(O3)CC=C1	InChI=1S/C28H36O6/c1-15-13-21(33-23(30)16(15)2)26(5,31)19-9-12-27(32)18-14-22-28(34-22)10-6-7-20(29)25(28,4)17(18)8-11-24(19,27)3/h6-7,9,17-18,21-22,31-32H,8,10-14H2,1-5H3/t17-,18+,21+,22+,24+,25-,26+,27+,28+/m0/s1	RROCKISJMKXBMJ-QJFLRJBQSA-N	Physalis peruviana	2017	10.1021/acs.jnatprod.6b01129	32
94	Physaminilide B	C30H38O8	526.257	526.626	O=C1[C@@]2(C)[C@@]([C@H]3C[C@]4([H])[C@]2([H])CC[C@@]5(C)[C@@]4(O)[C@@H](OC(C)=O)C=C5[C@@H]([C@]6([H])OC(C(C)=C(C)[C@@H]6O)=O)C)(O3)CC=C1	InChI=1S/C30H38O8/c1-14-15(2)26(34)37-25(24(14)33)16(3)19-12-23(36-17(4)31)30(35)20-13-22-29(38-22)10-7-8-21(32)28(29,6)18(20)9-11-27(19,30)5/h7-8,12,16,18,20,22-25,33,35H,9-11,13H2,1-6H3/t16-,18-,20+,22+,23?,24-,25-,27+,28-,29+,30-/m0/s1	YPSXXCGTXZHTIX-GRNXUEKMSA-N	Physalis minima	2020	10.1039/d0ra04106h	56
95	Physaliolide K	C28H36O7	484.246	484.589	C[C@@]12[C@@]([C@H]3C[C@]4([H])[C@]2([H])CC[C@@]5(C)[C@@]4(O)[C@@H](O)C=C5[C@@H]([C@]6([H])OC(C(C)=C(C)C6)=O)C)(O3)[C@@H](O)C=CC1=O	InChI=1S/C28H36O7/c1-13-10-19(34-24(32)14(13)2)15(3)17-11-22(31)27(33)18-12-23-28(35-23)21(30)7-6-20(29)26(28,5)16(18)8-9-25(17,27)4/h6-7,11,15-16,18-19,21-23,30-31,33H,8-10,12H2,1-5H3/t15-,16-,18+,19+,21-,22-,23+,25+,26-,27-,28+/m0/s1	HHOKRFARMNBNSQ-ZJMAPGACSA-N	Physalis minima	2020	10.1016/j.fitote.2019.104413	69
96	Physaminimin F	C30H40O9	544.267	544.641	O=C1[C@@]2(C)[C@@]([C@H]3C[C@]4([H])[C@]2([H])CC[C@@]5(C)[C@@]4(O)[C@@H](OC(C)=O)C=C5[C@H](C)[C@]6([H])OC(C(C)=C(C)C6)=O)(O3)[C@@H](O)[C@@H](O)C1	InChI=1S/C30H40O9/c1-13-9-21(38-26(35)14(13)2)15(3)18-10-23(37-16(4)31)29(36)19-11-24-30(39-24)25(34)20(32)12-22(33)28(30,6)17(19)7-8-27(18,29)5/h10,15,17,19-21,23-25,32,34,36H,7-9,11-12H2,1-6H3/t15-,17-,19+,20-,21+,23?,24+,25-,27+,28-,29-,30-/m0/s1	GKNJURYOLUWFCL-IYTMSMDMSA-N	Physalis minima	2014	10.1016/j.steroids.2014.01.004	129
97	Physaliolide L	C31H42O9	558.283	558.668	C[C@@]12[C@@]([C@H]3C[C@]4([H])[C@]2([H])CC[C@@]5(C)[C@@]4([H])[C@@H](OC(C)=O)C=C5[C@@H]([C@]6([H])OC(C(C)=C(CO)C6)=O)C)(O3)[C@@H](O)[C@@H](OC)CC1=O	InChI=1S/C31H42O9/c1-14-17(13-32)9-21(39-28(14)36)15(2)20-11-22(38-16(3)33)26-18-10-25-31(40-25)27(35)23(37-6)12-24(34)30(31,5)19(18)7-8-29(20,26)4/h11,15,18-19,21-23,25-27,32,35H,7-10,12-13H2,1-6H3/t15-,18+,19-,21+,22?,23?,25+,26+,27-,29+,30-,31-/m0/s1	OUBSZKVQVGFWOZ-FHMVLSMUSA-N	Physalis minima	2020	10.1021/acsomega.0c00467	111
98	Physaliolide G	C30H40O10	560.262	560.64	C[C@@]12[C@@]([C@H]3C[C@]4([H])[C@]2([H])CC[C@@]5(C)[C@@]4(O)[C@@H](OC(C)=O)C=C5[C@@H]([C@]6([H])OC(C(C)=C(C)[C@@H]6O)=O)C)(O3)[C@@H](O)[C@@H](O)CC1=O	InChI=1S/C30H40O10/c1-12-13(2)26(36)39-24(23(12)34)14(3)17-9-21(38-15(4)31)29(37)18-10-22-30(40-22)25(35)19(32)11-20(33)28(30,6)16(18)7-8-27(17,29)5/h9,14,16,18-19,21-25,32,34-35,37H,7-8,10-11H2,1-6H3/t14-,16-,18+,19-,21?,22+,23-,24-,25-,27+,28-,29-,30-/m0/s1	IYJXWASLAHTABL-GNYWAKROSA-N	Physalis minima	2020	10.1016/j.fitote.2019.104413	69
99	3-Methoxy-2,3-dihydrophysagulide D	C31H42O10	574.278	574.667	O=C1[C@@]2(C)[C@@]([C@H]3C[C@]4([H])[C@]2([H])CC[C@@]5(C)[C@@]4(O)[C@@H](OC(C)=O)C=C5[C@@H]([C@]6([H])OC(C(C)=C(C)[C@@H]6O)=O)C)(O3)[C@@H](O)[C@H](OC)C1	InChI=1S/C31H42O10/c1-13-14(2)27(36)40-25(24(13)34)15(3)18-10-22(39-16(4)32)30(37)19-11-23-31(41-23)26(35)20(38-7)12-21(33)29(31,6)17(19)8-9-28(18,30)5/h10,15,17,19-20,22-26,34-35,37H,8-9,11-12H2,1-7H3/t15-,17-,19+,20?,22?,23+,24-,25-,26-,28+,29-,30-,31-/m0/s1	RIILUSJCSKFLIR-YTGVQAAYSA-N	Physalis minima	2020	10.1039/d0ra04106h	56
100	Physaliolide I	C29H40O8	516.272	516.631	C[C@@]12[C@@]([C@H]3C[C@]4([H])[C@]2([H])CC[C@@]5(C)[C@@]4(O)[C@@H](O)C=C5[C@@H]([C@]6([H])OC(C(C)=C(C)C6)=O)C)(O3)[C@@H](O)[C@@H](OC)CC1=O	InChI=1S/C29H40O8/c1-13-9-19(36-25(33)14(13)2)15(3)17-10-22(31)28(34)18-11-23-29(37-23)24(32)20(35-6)12-21(30)27(29,5)16(18)7-8-26(17,28)4/h10,15-16,18-20,22-24,31-32,34H,7-9,11-12H2,1-6H3/t15-,16-,18+,19+,20?,22-,23+,24-,26+,27-,28-,29-/m0/s1	PSNQVFMHYGMLNR-OPGZSHDTSA-N	Physalis minima	2020	10.1016/j.fitote.2019.104413	69
101	Physaminilide C	C28H38O8	502.257	502.604	O=C1[C@@]2(C)[C@@]([C@H]3C[C@]4([H])[C@]2([H])CC[C@@]5(C)[C@@]4(O)[C@@H](O)C=C5[C@@H]([C@]6([H])OC(C(C)=C(C)C6)=O)C)(O3)[C@@H](O)[C@@H](O)C1	InChI=1S/C28H38O8/c1-12-8-19(35-24(33)13(12)2)14(3)16-9-21(31)27(34)17-10-22-28(36-22)23(32)18(29)11-20(30)26(28,5)15(17)6-7-25(16,27)4/h9,14-15,17-19,21-23,29,31-32,34H,6-8,10-11H2,1-5H3/t14-,15-,17+,18-,19+,21-,22+,23-,25+,26-,27-,28-/m0/s1	UISFCIJZOYBVHU-KLLMUJGUSA-N	Physalis minima	2020	10.1039/d0ra04106h	56
102	3-Methoxy-2,3-dihydrowithangulatin A	C31H42O9	558.283	558.668	O=C1[C@@]2(C)[C@@]([C@H]3C[C@]4([H])[C@]2([H])CC[C@@]5(C)[C@@]4(O)[C@@H](OC(C)=O)C=C5[C@@H]([C@]6([H])OC(C(C)=C(C)C6)=O)C)(O3)[C@@H](O)[C@H](OC)C1	InChI=1S/C31H42O9/c1-14-10-21(39-27(35)15(14)2)16(3)19-11-24(38-17(4)32)30(36)20-12-25-31(40-25)26(34)22(37-7)13-23(33)29(31,6)18(20)8-9-28(19,30)5/h11,16,18,20-22,24-26,34,36H,8-10,12-13H2,1-7H3/t16-,18-,20+,21+,22?,24?,25+,26-,28+,29-,30-,31-/m0/s1	WFAHURDTUNMOCL-ADFKDTEYSA-N	Physalis minima	2020	10.1039/d0ra04106h	56
103	Physaminilide A	C30H38O9	542.252	542.625	O=C1[C@@]2(C)[C@@]([C@H]3C[C@]4([H])[C@]2([H])CC[C@@]5(C)[C@@]4(O)[C@@H](OC(C)=O)C=C5[C@@H]([C@]6([H])OC(C([C@](C)(O)C6)=C)=O)C)(O3)[C@@H](O)C=C1	InChI=1S/C30H38O9/c1-14(20-13-27(5,35)15(2)25(34)38-20)18-11-23(37-16(3)31)29(36)19-12-24-30(39-24)22(33)8-7-21(32)28(30,6)17(19)9-10-26(18,29)4/h7-8,11,14,17,19-20,22-24,33,35-36H,2,9-10,12-13H2,1,3-6H3/t14-,17-,19+,20+,22-,23?,24+,26+,27+,28-,29-,30+/m0/s1	XLQZAJIDHIYGDR-YFDJLYQUSA-N	Physalis minima	2020	10.1039/d0ra04106h	56
104	Physaperuvin I	C28H38O7	486.262	486.605	O=C1[C@@]2(C)[C@@]([C@H]3C[C@]4([H])[C@]2([H])CC[C@@]5(C)[C@]4(CC=C5[C@@]([C@]6([H])OC(C(C)=C(C)C6)=O)(C)O)O)(O3)[C@@H](O)CC1	InChI=1S/C28H38O7/c1-14-12-21(34-23(31)15(14)2)26(5,32)18-9-11-27(33)17-13-22-28(35-22)20(30)7-6-19(29)25(28,4)16(17)8-10-24(18,27)3/h9,16-17,20-22,30,32-33H,6-8,10-13H2,1-5H3/t16-,17+,20-,21+,22+,24+,25-,26+,27+,28+/m0/s1	OWNKFQLAEYXSSE-LTCWBFOISA-N	Physalis peruviana	2016	10.1016/j.bmcl.2016.04.077	68
105	5β,6β-epoxy-4β,16β,27-trihydroxy-1-oxo-witha-2,17(20),24-trienolide	C28H36O7	484.246	484.589	O=C1[C@@]2(C)[C@@]([C@H]3C[C@]4([H])[C@]2([H])CC[C@@]5(C)[C@]4(C[C@H](O)/C5=C([C@]6([H])OC(C(CO)=C(C)C6)=O)/C)[H])(O3)[C@@H](O)C=C1	InChI=1S/C28H36O7/c1-13-9-20(34-25(33)16(13)12-29)14(2)24-19(30)11-18-15-10-23-28(35-23)22(32)6-5-21(31)27(28,4)17(15)7-8-26(18,24)3/h5-6,15,17-20,22-23,29-30,32H,7-12H2,1-4H3/b24-14+/t15-,17+,18+,19+,20-,22+,23-,26+,27+,28-/m1/s1	JTZPNCJAOIXLBY-MJLZLXPLSA-N	Withania aristate	2012	10.1016/j.ejmech.2012.05.032	42
106	5,6-deoxywithaferin A	C28H38O5	454.272	454.607	O=C(C=C[C@@H]1O)[C@@]2(C)C1=CC[C@]3([H])[C@]2([H])CC[C@@]4(C)[C@]3(CC[C@]4([H])[C@@H]([C@]5([H])OC(C(CO)=C(C)C5)=O)C)[H]	InChI=1S/C28H38O5/c1-15-13-24(33-26(32)18(15)14-29)16(2)19-7-8-20-17-5-6-22-23(30)9-10-25(31)28(22,4)21(17)11-12-27(19,20)3/h6,9-10,16-17,19-21,23-24,29-30H,5,7-8,11-14H2,1-4H3/t16-,17-,19+,20-,21-,23-,24+,27+,28+/m0/s1	SHDXNRZAYHPFMX-OBQFDWBNSA-N	Acnistus breviflorus and Withania somnifera	2014	10.1007/s10870-014-0499-1	34
107	Aurelianolide B	C30H40O7	512.277	512.643	O=C(C=C[C@@H]1O)[C@@]2(C)C1=CC[C@]3([H])[C@]2([H])CC[C@@]4(C)[C@]3(C[C@@H](OC(C)=O)[C@]4(O)[C@@H]([C@]5([H])OC(C(C)=C(C)C5)=O)C)[H]	InChI=1S/C30H40O7/c1-15-13-24(37-27(34)16(15)2)17(3)30(35)26(36-18(4)31)14-22-19-7-8-21-23(32)9-10-25(33)29(21,6)20(19)11-12-28(22,30)5/h8-10,17,19-20,22-24,26,32,35H,7,11-14H2,1-6H3/t17-,19-,20+,22+,23+,24-,26?,28+,29-,30-/m1/s1	DLDCHBLNDGUSRN-VKKSEDPSSA-N	Aureliana fasciculata var. fasciculata	2010	10.1002/hlca.201000126	35
108	Obtusifonolide	C30H40O6	496.283	496.644	CC(C1)=C(CO)C(O[C@@]1([H])[C@@H](C)[C@@]2([H])[C@H](OC(C)=O)C[C@@]3([H])[C@]4([H])CC=C([C@@]5(C)[C@@]4([H])CC[C@@]32C)CC=CC5=O)=O	InChI=1S/C30H40O6/c1-16-13-24(36-28(34)21(16)15-31)17(2)27-25(35-18(3)32)14-23-20-10-9-19-7-6-8-26(33)30(19,5)22(20)11-12-29(23,27)4/h6,8-9,17,20,22-25,27,31H,7,10-15H2,1-5H3/t17-,20-,22+,23+,24-,25-,27+,29+,30+/m1/s1	WYMLQZMLIVADQG-OGJIUFCNSA-N	Withania obtusifolia	2014	10.1016/j.phytol.2014.05.002	70
109	Physacoztolide G	C36H50O14	706.32	706.782	O=C(C=CC1)[C@@]2(C)C1=CC[C@]3([H])[C@]2([H])CC[C@@]4(COC(C)=O)[C@]3(CC[C@@]4([C@@](C5OC(C(C)=C(CO[C@@H]([C@@H]6O)O[C@H](CO)[C@@H](O)[C@@H]6O)C5)=O)(C)O)O)O	InChI=1S/C36H50O14/c1-18-20(16-47-31-29(42)28(41)27(40)24(15-37)49-31)14-26(50-30(18)43)33(4,44)36(46)13-12-35(45)23-9-8-21-6-5-7-25(39)32(21,3)22(23)10-11-34(35,36)17-48-19(2)38/h5,7-8,22-24,26-29,31,37,40-42,44-46H,6,9-17H2,1-4H3/t22-,23+,24+,26?,27+,28-,29+,31+,32-,33-,34+,35+,36-/m0/s1	MAXZATRQBAZMMX-KGMKNMNKSA-N	Physalis coztomatl	2015	10.1016/j.phytochem.2014.10.012	71
110	Physacoztolide H	C34H48O12	648.315	648.746	O=C(C=CC1)[C@@]2(C)C1=CC[C@]3([H])[C@]2([H])CC[C@@]4(C)[C@]3(CC[C@@]4([C@@](C5OC(C(CO[C@@H]([C@@H]6O)O[C@H](CO)[C@@H](O)[C@@H]6O)=C(C)C5)=O)(C)O)O)O	InChI=1S/C34H48O12/c1-17-14-24(46-28(40)19(17)16-44-29-27(39)26(38)25(37)22(15-35)45-29)32(4,41)34(43)13-12-33(42)21-9-8-18-6-5-7-23(36)31(18,3)20(21)10-11-30(33,34)2/h5,7-8,20-22,24-27,29,35,37-39,41-43H,6,9-16H2,1-4H3/t20-,21+,22+,24?,25+,26-,27+,29+,30-,31-,32-,33+,34+/m0/s1	FULBLSHOVPURLV-NDSAGDTASA-N	Physalis coztomatl	2015	10.1016/j.phytochem.2014.10.012	71
111	Withacoagulin D	C28H38O7	486.262	486.605	O=C(C=CC1)[C@@]2(C)C1=CC[C@]3([H])[C@]2([H])CC[C@@]4(C)[C@@]3(O)CC[C@@]4([C@@]([C@]5([H])OC(C(CO)=C(C)C5)=O)(C)O)O	InChI=1S/C28H38O7/c1-16-14-22(35-23(31)18(16)15-29)26(4,32)28(34)13-12-27(33)20-9-8-17-6-5-7-21(30)25(17,3)19(20)10-11-24(27,28)2/h5,7-8,19-20,22,29,32-34H,6,9-15H2,1-4H3/t19-,20+,22+,24-,25-,26-,27+,28+/m0/s1	NOFNARPLYQSKHE-WEJNEFSASA-N	Withania coagulans	2015, 2010	10.1016/j.phytochem.2014.10.012 and 10.1002/hlca.200900265	71, 72	coagulansin A
112	Withacoagulin G	C28H38O6	470.267	470.606	O=C(C=CC1)[C@@]2(C)C1=CC[C@]3([H])[C@]2([H])CC[C@@]4(C)[C@@]3([H])CC[C@@]4([C@@]([C@]5([H])OC(C(CO)=C(C)C5)=O)(C)O)O	InChI=1S/C28H38O6/c1-16-14-23(34-24(31)19(16)15-29)27(4,32)28(33)13-11-20-18-9-8-17-6-5-7-22(30)26(17,3)21(18)10-12-25(20,28)2/h5,7-8,18,20-21,23,29,32-33H,6,9-15H2,1-4H3/t18-,20-,21-,23+,25-,26-,27-,28+/m0/s1	CHNXPBONLRCQFD-VOQRJTHWSA-N	Withania coagulans	2013	10.1021/np300534x	73
113	Withacoagulin H	C28H36O6	468.251	468.59	O=C(C=CC1)[C@@]2(C)C1=CC[C@]3([H])[C@]2([H])CC[C@@]4(C)C3=CC[C@@]4([C@@]([C@]5([H])OC(C(CO)=C(C)C5)=O)(C)O)O	InChI=1S/C28H36O6/c1-16-14-23(34-24(31)19(16)15-29)27(4,32)28(33)13-11-20-18-9-8-17-6-5-7-22(30)26(17,3)21(18)10-12-25(20,28)2/h5,7-8,11,18,21,23,29,32-33H,6,9-10,12-15H2,1-4H3/t18-,21-,23+,25-,26-,27-,28+/m0/s1	UNWUYUBEZUQEBC-DREDRYRMSA-N	Withania coagulans	2013	10.1021/np300534x	73
114	rel-(20R,22R)-16α-Acetoxy-20-hydroxy-1-oxowitha-2,5,24-trienolide	C30H40O6	496.283	496.644	O=C(C=CC1)[C@@]2(C)C1=CC[C@]3([H])[C@]2([H])CC[C@@]4(C)[C@@]3([H])C[C@@H](OC(C)=O)[C@]4([H])[C@@]([C@]5([H])OC(C(C)=C(C)C5)=O)(C)O	InChI=1S/C30H40O6/c1-16-14-25(36-27(33)17(16)2)30(6,34)26-23(35-18(3)31)15-22-20-11-10-19-8-7-9-24(32)29(19,5)21(20)12-13-28(22,26)4/h7,9-10,20-23,25-26,34H,8,11-15H2,1-6H3/t20-,21+,22+,23?,25-,26+,28+,29+,30+/m1/s1	NHPHIDJOWYDUEO-XAQHIJCMSA-N	Acnistus arborescens	2016	10.1016/j.phytochem.2016.07.003	37
115	(22R)-4α,17α,27-Trihydroxy-1-oxo-witha-2,5,24-trienolide	C28H38O6	470.267	470.606	O=C(C=C[C@H]1O)[C@@]2(C)C1=CC[C@]3([H])[C@]2([H])CC[C@@]4(C)[C@@]3([H])CC[C@@]4([C@@H]([C@]5([H])OC(C(CO)=C(C)C5)=O)C)O	InChI=1S/C28H38O6/c1-15-13-23(34-25(32)18(15)14-29)16(2)28(33)12-10-19-17-5-6-21-22(30)7-8-24(31)27(21,4)20(17)9-11-26(19,28)3/h6-8,16-17,19-20,22-23,29-30,33H,5,9-14H2,1-4H3/t16-,17+,19+,20+,22-,23-,26+,27-,28+/m1/s1	USOMAXFKOLHZHW-JTEBDBDFSA-N	Withania aristate	2010	10.1016/j.steroids.2010.06.001	74
116	Exodeconolide F	C28H38O5	454.272	454.607	O=C(C=CC1)[C@@]2(C)C1=CC[C@]3([H])[C@]2([H])CC[C@@]4(C)C3(O)C(O)C[C@]4([H])[C@@H]([C@]5([H])OC(C(C)=C(C)C5)=O)C	InChI=1S/C28H38O5/c1-15-13-22(33-25(31)16(15)2)17(3)21-14-24(30)28(32)20-10-9-18-7-6-8-23(29)27(18,5)19(20)11-12-26(21,28)4/h6,8-9,17,19-22,24,30,32H,7,10-14H2,1-5H3/t17-,19-,20+,21+,22+,24?,26+,27-,28?/m0/s1	JPXKTHKROZWEPM-BBCCOHTBSA-N	Exodeconus pusillus	2020	10.1016/j.steroids.2020.108700	75
117	23β-Hydroxyphysacoztolide E	C30H40O8	528.272	528.642	O=C(C=CC1)[C@@]2(C)C1=CC[C@]3([H])[C@]2([H])CC[C@@]4(COC(C)=O)[C@]3(CC[C@]4([H])[C@@]([C@]5([H])OC(C(C)=C(C)[C@@H]5O)=O)(C)O)O	InChI=1S/C30H40O8/c1-16-17(2)26(34)38-25(24(16)33)28(5,35)22-12-14-30(36)21-10-9-19-7-6-8-23(32)27(19,4)20(21)11-13-29(22,30)15-37-18(3)31/h6,8-9,20-22,24-25,33,35-36H,7,10-15H2,1-5H3/t20-,21+,22+,24-,25+,27-,28+,29-,30+/m0/s1	TZLHCPGFUZRJBB-QGHVMNCZSA-N	Physalis crassifolia	2016	10.1021/acs.jnatprod.5b00911	76
118	Withacoagulide C	C28H38O6	470.267	470.606	O=C(C=CC1)[C@@]2(C)C1=CC[C@]3([H])[C@]2([H])CC[C@@]4(C)[C@@]3(CC[C@]4(O)[C@@]([C@]5([H])OC(C(C)=C(C)C5)=O)(C)O)O	InChI=1S/C28H38O6/c1-16-15-22(34-23(30)17(16)2)26(5,31)28(33)14-13-27(32)20-10-9-18-7-6-8-21(29)25(18,4)19(20)11-12-24(27,28)3/h6,8-9,19-20,22,31-33H,7,10-15H2,1-5H3/t19-,20+,22+,24-,25-,26-,27-,28+/m0/s1	GQHHHBATDOXAEP-IMANIDBLSA-N	Withania coagulans	2012	10.1248/cpb.c12-00264	96
119	Dinoxin B	C34H48O11	632.32	632.747	O=C(C=CC1)[C@@]2(C)C1=CC[C@]3([H])[C@]2([H])C[C@@H](O)[C@@]4(C)[C@]3(CC[C@]4([H])[C@@H]([C@]5([H])OC(C(CO[C@@H]([C@@H]6O)O[C@H](CO)[C@@H](O)[C@@H]6O)=C(C)C5)=O)CO)[H]	InChI=1S/C34H48O11/c1-16-11-24(44-31(42)20(16)15-43-32-30(41)29(40)28(39)25(14-36)45-32)19(13-35)22-10-9-21-18-8-7-17-5-4-6-26(37)33(17,2)23(18)12-27(38)34(21,22)3/h4,6-7,18-19,21-25,27-30,32,35-36,38-41H,5,8-15H2,1-3H3/t18-,19-,21-,22+,23-,24+,25+,27+,28+,29-,30+,32+,33-,34-/m0/s1	LZMUHRZRHBVVTP-MHEOYVQJSA-N	Datura inoxia	2011	10.1021/np1004714	77
120	24,25-Dihydro-23β,28-dihydroxywithanolide G	C28H40O7	488.277	488.621	O=C(C=CC1)[C@@]2(C)C1=CC[C@]3([H])[C@]2([H])CC[C@@]4(C)[C@@]3(O)CC[C@]4([H])[C@@]([C@]5([H])OC([C@H](C)[C@@H](CO)[C@@H]5O)=O)(C)O	InChI=1S/C28H40O7/c1-15-17(14-29)22(31)23(35-24(15)32)27(4,33)20-11-13-28(34)19-9-8-16-6-5-7-21(30)26(16,3)18(19)10-12-25(20,28)2/h5,7-8,15,17-20,22-23,29,31,33-34H,6,9-14H2,1-4H3/t15-,17-,18+,19-,20+,22+,23-,25-,26+,27-,28-/m1/s1	SSEUSATUQYSFDI-ANQYCLCFSA-N	Physalis peruviana	2017	10.1021/acs.jnatprod.6b01129	32
121	Cilistol G	C28H42O6	474.298	474.638	O=C(C=CC1)[C@@]2(C)C1=CC[C@]3([H])[C@]2([H])CC[C@@]4(C)[C@]3(CC[C@]4(O)[C@@H]([C@]5([H])OC(O)[C@@](C)(O)[C@@](O)(C)C5)C)[H]	InChI=1S/C28H42O6/c1-16(21-15-25(3,31)27(5,32)23(30)34-21)28(33)14-12-19-18-10-9-17-7-6-8-22(29)26(17,4)20(18)11-13-24(19,28)2/h6,8-9,16,18-21,23,30-33H,7,10-15H2,1-5H3/t16-,18+,19+,20+,21-,23?,24+,25-,26+,27-,28+/m1/s1	DLJKJPONFBSXHR-FGNMPWMKSA-N	Solanum capsicoides and Solanum cilistum	2015	10.1039/c5ra12014d	50
122	Capsisteroid A	C30H44O7	516.309	516.675	O=C(C=CC1)[C@@]2(C)C1=CC[C@]3([H])[C@]2([H])CC[C@@]4(C)[C@]3(CC[C@]4(O)[C@@H]([C@]5([H])OC(O)[C@@](C)(O)[C@](C)(OC(C)=O)C5)C)[H]	InChI=1S/C30H44O7/c1-17(23-16-27(4,37-18(2)31)29(6,34)25(33)36-23)30(35)15-13-21-20-11-10-19-8-7-9-24(32)28(19,5)22(20)12-14-26(21,30)3/h7,9-10,17,20-23,25,33-35H,8,11-16H2,1-6H3/t17-,20+,21+,22+,23-,25?,26+,27?,28+,29-,30+/m1/s1	PWFPEIVOGUNUML-PAKZIMNJSA-N	Solanum capsicoides	2015	10.1039/c5ra12014d	50
123	Daturamalakoside B and 12α-Hydroxydaturametelin B	C34H48O11	632.32	632.747	O=C(C=CC1)[C@@]2(C)C1=CC[C@]3([H])[C@]2([H])C[C@H](O)[C@@]4(C)[C@]3(CC[C@]4([H])[C@@H]([C@]5([H])OC(C(CO[C@@H]([C@@H]6O)O[C@H](CO)[C@@H](O)[C@@H]6O)=C(C)C5)=O)CO)[H]	InChI=1S/C34H48O11/c1-16-11-24(44-31(42)20(16)15-43-32-30(41)29(40)28(39)25(14-36)45-32)19(13-35)22-10-9-21-18-8-7-17-5-4-6-26(37)33(17,2)23(18)12-27(38)34(21,22)3/h4,6-7,18-19,21-25,27-30,32,35-36,38-41H,5,8-15H2,1-3H3/t18-,19-,21-,22+,23-,24+,25+,27-,28+,29-,30+,32+,33-,34-/m0/s1	LZMUHRZRHBVVTP-PTGSEZCUSA-N	Datura metel L.	2011	10.1016/j.phytochem.2011.07.009	134
124	Dmetelin D	C28H38O5	454.272	454.607	O=C(C=CC1)[C@@]2(C)C1=C[C@H](O)[C@]3([H])[C@]2([H])CC[C@@]4(C)[C@]3(CC[C@]4([H])[C@@H]([C@]5([H])OC(C(CO)=C(C)C5)=O)C)[H]	InChI=1S/C28H38O5/c1-15-12-23(33-26(32)18(15)14-29)16(2)19-8-9-20-25-21(10-11-27(19,20)3)28(4)17(13-22(25)30)6-5-7-24(28)31/h5,7,13,16,19-23,25,29-30H,6,8-12,14H2,1-4H3/t16-,19+,20-,21-,22-,23+,25-,27+,28-/m0/s1	UKCDPEQADUKCDH-XALNOGQISA-N	Datura metel L.	2014	10.3390/molecules19044548	80
125	Daturmetelide P	C35H50O9	614.346	614.776	[H][C@]12[C@@]([C@]([H])(CC[C@]3([H])[C@@H](C4OC(C(CO[C@@H]([C@@H]5O)O[C@H](CO)[C@@H](O)[C@@H]5O)=C(CC)C4)=O)C)[C@]3(C)CC2)([H])CC=C([C@]61C)CC=CC6=O	InChI=1S/C35H50O9/c1-5-19-15-26(43-32(41)22(19)17-42-33-31(40)30(39)29(38)27(16-36)44-33)18(2)23-11-12-24-21-10-9-20-7-6-8-28(37)35(20,4)25(21)13-14-34(23,24)3/h6,8-9,18,21,23-27,29-31,33,36,38-40H,5,7,10-17H2,1-4H3/t18-,21-,23+,24-,25-,26?,27+,29+,30-,31+,33+,34+,35-/m0/s1	IQJIEYRBVYRZAX-LRXSXSKSSA-N	Datura metel L.	2020	10.1016/j.bioorg.2019.103541	82
126	Dmetelin C	C40H58O15	778.378	778.889	O=C(C=CC1)[C@@]2(C)C1=C[C@@H](O)[C@]3([H])[C@]2([H])CC[C@@]4(C)[C@]3(CC[C@]4([H])[C@@H]([C@]5([H])OC(C(CO[C@@]([H])([C@@H]6O)O[C@H](CO[C@@H]([C@@H]7O)O[C@H](CO)[C@@H](O)[C@@H]7O)[C@@H](O)[C@@H]6O)=C(C)C5)=O)C)[H]	InChI=1S/C40H58O15/c1-17-12-25(18(2)21-8-9-22-29-23(10-11-39(21,22)3)40(4)19(13-24(29)42)6-5-7-28(40)43)53-36(50)20(17)15-51-37-35(49)33(47)31(45)27(55-37)16-52-38-34(48)32(46)30(44)26(14-41)54-38/h5,7,13,18,21-27,29-35,37-38,41-42,44-49H,6,8-12,14-16H2,1-4H3/t18-,21+,22-,23-,24+,25+,26+,27+,29-,30+,31+,32-,33-,34+,35+,37+,38+,39+,40-/m0/s1	BPJUVUJVWZYBTE-GSQZTXNFSA-N	Datura metel L.	2014	10.3390/molecules19044548	80
127	Withasilolide A	C28H38O5	454.272	454.607	O=C(C=CC1)[C@@]2(C)C1=C[C@@H](O)[C@]3([H])[C@]2([H])CC[C@@]4(C)[C@@]3([H])CC[C@]4([H])[C@@]([C@]5([H])OC(C(C)=C(C)C5)=O)(C)O	InChI=1S/C28H38O5/c1-15-13-23(33-25(31)16(15)2)28(5,32)21-10-9-18-24-19(11-12-26(18,21)3)27(4)17(14-20(24)29)7-6-8-22(27)30/h6,8,14,18-21,23-24,29,32H,7,9-13H2,1-5H3/t18-,19-,20+,21-,23+,24-,26-,27-,28+/m0/s1	XJTPWDBJTUZWFI-RKKOJPJSSA-N	Withania somnifera	2019	10.1021/acs.jnatprod.8b00665	99
128	Withasilolide B	C28H40O5	456.288	456.623	O=C(C=CC1)[C@@]2(C)C1=C[C@@H](O)[C@]3([H])[C@]2([H])CC[C@@]4(C)[C@@]3([H])CC[C@]4([H])[C@@]([C@]5([H])OC([C@H](C)[C@@H](C)C5)=O)(C)O	InChI=1S/C28H40O5/c1-15-13-23(33-25(31)16(15)2)28(5,32)21-10-9-18-24-19(11-12-26(18,21)3)27(4)17(14-20(24)29)7-6-8-22(27)30/h6,8,14-16,18-21,23-24,29,32H,7,9-13H2,1-5H3/t15-,16+,18-,19-,20+,21-,23+,24-,26-,27-,28+/m0/s1	YEPXUIIRIHRSJQ-SRCMXEEUSA-N	Withania somnifera	2019	10.1021/acs.jnatprod.8b00665	99
129	Exodeconolide D	C30H42O7	514.293	514.659	O=C(C=CC1)[C@@]2(C)C1=C[C@@H](O)[C@]3([H])[C@]2([H])CC[C@@]4(C)[C@@]3([H])C[C@@H](OC(C)=O)[C@]4([H])[C@@H]([C@]5([H])O[C@@H](O)[C@@](C)(O6)[C@]6(C)C5)C	InChI=1S/C30H42O7/c1-15(22-14-28(4)30(6,37-28)26(34)36-22)25-21(35-16(2)31)13-19-24-18(10-11-27(19,25)3)29(5)17(12-20(24)32)8-7-9-23(29)33/h7,9,12,15,18-22,24-26,32,34H,8,10-11,13-14H2,1-6H3/t15-,18+,19+,20-,21?,22-,24-,25+,26-,27+,28+,29+,30-/m1/s1	IBFURTOWZFRWTN-HBWOZQQXSA-N	Exodeconus pusillus	2020	10.1016/j.steroids.2020.108700	75
130	Exodeconolide E	C30H40O7	512.277	512.643	O=C(C=CC1)[C@@]2(C)C1=C[C@@H](O)[C@]3([H])[C@]2([H])CC[C@@]4(C)[C@@]3([H])C[C@@H](OC(C)=O)[C@]4([H])[C@@H]([C@]5([H])OC([C@@](C)(O6)[C@]6(C)C5)=O)C	InChI=1S/C30H40O7/c1-15(22-14-28(4)30(6,37-28)26(34)36-22)25-21(35-16(2)31)13-19-24-18(10-11-27(19,25)3)29(5)17(12-20(24)32)8-7-9-23(29)33/h7,9,12,15,18-22,24-25,32H,8,10-11,13-14H2,1-6H3/t15-,18+,19+,20-,21?,22-,24-,25+,27+,28+,29+,30-/m1/s1	XSCVNOMBPPHGJM-OGUHKGPZSA-N	Exodeconus pusillus	2020	10.1016/j.steroids.2020.108700	75
131	Daturmetelide F	C28H38O6	470.267	470.606	[H][C@]12[C@@]([C@]([H])([C@H](O)C[C@]3([H])[C@@H](C4OC(C(CO)=C(C)C4)=O)C)[C@]3(C)CC2)([H])[C@H](O)C=C([C@]51C)CC=CC5=O	InChI=1S/C28H38O6/c1-14-10-22(34-26(33)17(14)13-29)15(2)19-12-21(31)25-24-18(8-9-27(19,25)3)28(4)16(11-20(24)30)6-5-7-23(28)32/h5,7,11,15,18-22,24-25,29-31H,6,8-10,12-13H2,1-4H3/t15-,18-,19+,20+,21+,22?,24-,25-,27+,28-/m0/s1	MDUFOPOMZOSEKU-PVUHUKQGSA-N	Datura metel L.	2020	10.1016/j.bioorg.2019.103541	82
132	Daturmetelide G	C28H38O7	486.262	486.605	[H][C@]12[C@@]([C@]([H])([C@H](O)C[C@]3([H])[C@@H](C4OC(C(CO)=C(C)C4)=O)C)[C@]3(C)CC2)([H])[C@H](O)C=C([C@]51C)[C@@H](O)C=CC5=O	InChI=1S/C28H38O7/c1-13-9-22(35-26(34)15(13)12-29)14(2)17-10-21(32)25-24-16(7-8-27(17,25)3)28(4)18(11-20(24)31)19(30)5-6-23(28)33/h5-6,11,14,16-17,19-22,24-25,29-32H,7-10,12H2,1-4H3/t14-,16-,17+,19-,20+,21+,22?,24-,25-,27+,28+/m0/s1	WDOUGZCJVBVEDC-CWCADZACSA-N	Datura metel L.	2020	10.1016/j.bioorg.2019.103541	82
133	Daturmetelide E	C28H40O6	472.283	472.622	[H][C@]12[C@@]([C@]([H])(CC[C@]3([H])[C@@H](C4OC(C(CO)=C(C)C4)=O)C)[C@]3(C)[C@H](O)C2)([H])[C@H](O)C=C([C@]51C)CCCC5=O	InChI=1S/C28H40O6/c1-14-10-22(34-26(33)17(14)13-29)15(2)18-8-9-19-25-20(12-24(32)28(18,19)4)27(3)16(11-21(25)30)6-5-7-23(27)31/h11,15,18-22,24-25,29-30,32H,5-10,12-13H2,1-4H3/t15-,18+,19-,20-,21+,22?,24+,25-,27-,28+/m0/s1	CWNWAMVXYKXUNY-NJGQVEKYSA-N	Datura metel L.	2020	10.1016/j.bioorg.2019.103541	82
134	Daturmetelide I	C29H42O6	486.298	486.649	[H][C@]12[C@@]([C@]([H])(CC[C@]3([H])[C@@H](C4OC(C(CO)=C(C)C4)=O)C)[C@]3(C)CC2)([H])[C@H](O)C=C([C@]51C)C[C@@H](OC)CC5=O	InChI=1S/C29H42O6/c1-15-10-24(35-27(33)19(15)14-30)16(2)20-6-7-21-26-22(8-9-28(20,21)3)29(4)17(12-23(26)31)11-18(34-5)13-25(29)32/h12,16,18,20-24,26,30-31H,6-11,13-14H2,1-5H3/t16-,18?,20+,21-,22-,23+,24?,26-,28+,29-/m0/s1	HBDSTOFWOCKTFC-FYJDGGENSA-N	Datura metel L.	2020	10.1016/j.bioorg.2019.103541	82
135	Daturmetelide R	C35H50O10	630.34	630.775	[H][C@]12[C@@]([C@]([H])(CC[C@]3([H])[C@@H](C4OC(C(CO[C@@H]([C@@H]5O)O[C@H](CO)[C@@H](O)[C@@H]5O)=C(C)C4)=O)C)[C@]3(C)CC2)([H])[C@H](OC)C=C([C@]61C)CC=CC6=O	InChI=1S/C35H50O10/c1-17-13-24(44-32(41)20(17)16-43-33-31(40)30(39)29(38)26(15-36)45-33)18(2)21-9-10-22-28-23(11-12-34(21,22)3)35(4)19(14-25(28)42-5)7-6-8-27(35)37/h6,8,14,18,21-26,28-31,33,36,38-40H,7,9-13,15-16H2,1-5H3/t18-,21+,22-,23-,24?,25?,26+,28-,29+,30-,31+,33+,34+,35-/m0/s1	USVWVXKCBAAOJD-ZJTJMBPKSA-N	Datura metel L.	2020	10.1016/j.bioorg.2019.103541	82
136	(17S,20R,22R)-4β,7β,18,20-Tetrahydroxy-1-oxowitha-2,5,24-trienolide	C28H38O7	486.262	486.605	O=C(C=C[C@@H]1O)[C@@]2(C)C1=C[C@H](O)[C@]3([H])[C@]2([H])CC[C@@]4(CO)[C@@]3([H])CC[C@]4([H])[C@](C)([C@]5([H])OC(C(C)=C(C)C5)=O)O	InChI=1S/C28H38O7/c1-14-11-23(35-25(33)15(14)2)27(4,34)21-7-5-17-24-16(9-10-28(17,21)13-29)26(3)18(12-20(24)31)19(30)6-8-22(26)32/h6,8,12,16-17,19-21,23-24,29-31,34H,5,7,9-11,13H2,1-4H3/t16-,17-,19-,20-,21+,23+,24+,26+,27+,28+/m0/s1	YLCDAUGFQABQND-HAGVONBDSA-N	Eriolarynx iochromoides	2019	10.1021/acs.jnatprod.9b00117	81
137	5,6-De-epoxy-5-en-7-one-17-hydroxy withaferin A	C28H36O7	484.246	484.589	O=C(C=C[C@@H]1O)[C@@]2(C)C1=CC([C@]3([H])[C@]2([H])CC[C@@]4(C)[C@@]3([H])CC[C@@]4([C@@H](C5OC(C(CO)=C(C)C5)=O)C)O)=O	InChI=1S/C28H36O7/c1-14-11-22(35-25(33)16(14)13-29)15(2)28(34)10-8-17-24-18(7-9-26(17,28)3)27(4)19(12-21(24)31)20(30)5-6-23(27)32/h5-6,12,15,17-18,20,22,24,29-30,34H,7-11,13H2,1-4H3/t15-,17+,18+,20+,22?,24+,26+,27-,28+/m1/s1	ZFFWTGZKGIMSGZ-AMSYVFDRSA-N	Withania somnifera L. Dunal.	2014	10.1080/14786419.2013.871545	83
138	5,6-De-epoxy-5-en-7-one-17-hydroxy withaferin A diacetate	C32H40O9	568.267	568.663	O=C(C=C[C@@H]1O)[C@@]2(C)C1=CC([C@]3([H])[C@]2([H])CC[C@@]4(C)[C@@]3([H])CC[C@@]4([C@@H](C5OC(C(COC(C)=O)=C(C)C5)=O)C)OC(C)=O)=O	InChI=1S/C32H40O9/c1-16-13-26(40-29(38)20(16)15-39-18(3)33)17(2)32(41-19(4)34)12-10-21-28-22(9-11-30(21,32)5)31(6)23(14-25(28)36)24(35)7-8-27(31)37/h7-8,14,17,21-22,24,26,28,35H,9-13,15H2,1-6H3/t17-,21+,22+,24+,26?,28+,30+,31-,32?/m1/s1	GGOWYCPEDZAHAT-PDQLOPNQSA-N	Acetylation of 5,6-De-epoxy-5-en-7-one-17-hydroxy withaferin A	2014	10.1080/14786419.2013.871545	83
139	Capsisteroid G	C28H44O7	492.309	492.653	O=C(C[C@@H](O)C1)[C@@]2(C)C1=CC[C@]3([H])[C@]2([H])CC[C@@]4(C)[C@@]3([H])CC[C@]4(O)[C@@H]([C@]5([H])OC(O)[C@@](C)(O)[C@@](O)(C)C5)C	InChI=1S/C28H44O7/c1-15(21-14-25(3,32)27(5,33)23(31)35-21)28(34)11-9-19-18-7-6-16-12-17(29)13-22(30)26(16,4)20(18)8-10-24(19,28)2/h6,15,17-21,23,29,31-34H,7-14H2,1-5H3/t15-,17+,18+,19+,20+,21-,23?,24+,25-,26+,27-,28+/m1/s1	GEDRWNCCEOMXEU-ZUSJQMQASA-N	Solanum capsicoides	2019	10.1246/bcsj.20180225	79
140	Capsisteroid H	C28H44O7	492.309	492.653	O=C(C[C@H](O)C1)[C@@]2(C)C1=CC[C@]3([H])[C@]2([H])CC[C@@]4(C)[C@@]3([H])CC[C@]4(O)[C@@H]([C@]5([H])OC(O)[C@@](C)(O)[C@@](O)(C)C5)C	InChI=1S/C28H44O7/c1-15(21-14-25(3,32)27(5,33)23(31)35-21)28(34)11-9-19-18-7-6-16-12-17(29)13-22(30)26(16,4)20(18)8-10-24(19,28)2/h6,15,17-21,23,29,31-34H,7-14H2,1-5H3/t15-,17-,18+,19+,20+,21-,23?,24+,25-,26+,27-,28+/m1/s1	GEDRWNCCEOMXEU-QTAYSHAPSA-N	Solanum capsicoides	2019	10.1246/bcsj.20180225	79
141	Capsisteroid J	C28H46O6	478.329	478.67	O[C@@H](C[C@H](O)C1)[C@@]2(C)C1=CC[C@]3([H])[C@]2([H])CC[C@@]4(C)[C@@]3([H])CC[C@]4([H])[C@@H]([C@]5([H])OC(O)[C@@](C)(O)[C@@](O)(C)C5)C	InChI=1S/C28H46O6/c1-15(22-14-26(3,32)28(5,33)24(31)34-22)19-8-9-20-18-7-6-16-12-17(29)13-23(30)27(16,4)21(18)10-11-25(19,20)2/h6,15,17-24,29-33H,7-14H2,1-5H3/t15-,17+,18-,19+,20-,21-,22+,23-,24?,25+,26+,27-,28+/m0/s1	SAIGRYSDCINMIC-SMJHPVLSSA-N	Solanum capsicoides	2019	10.1246/bcsj.20180225	79
142	Capsisteroid B	C30H44O7	516.309	516.675	O=C(CC=C1)[C@@]2(C)C1=CC[C@]3([H])[C@]2([H])CC[C@@]4(C)[C@]3(CC[C@]4(O)[C@@H]([C@]5([H])OC(O)[C@](O)(C)[C@](C)(OC(C)=O)C5)C)[H]	InChI=1S/C30H44O7/c1-17(23-16-27(4,37-18(2)31)29(6,34)25(33)36-23)30(35)15-13-21-20-11-10-19-8-7-9-24(32)28(19,5)22(20)12-14-26(21,30)3/h7-8,10,17,20-23,25,33-35H,9,11-16H2,1-6H3/t17-,20+,21+,22+,23-,25?,26+,27?,28+,29-,30+/m1/s1	LOYPXAQCCMEWEN-PAKZIMNJSA-N	Solanum capsicoides	2015	10.1039/c5ra12014d	50
143	Capsisteroid C	C28H42O6	474.298	474.638	O=C(CC=C1)[C@@]2(C)C1=CC[C@]3([H])[C@]2([H])CC[C@@]4(C)[C@]3(CC[C@]4(O)[C@@H]([C@]5([H])OC(O)[C@](O)(C)[C@@](O)(C)C5)C)[H]	InChI=1S/C28H42O6/c1-16(21-15-25(3,31)27(5,32)23(30)34-21)28(33)14-12-19-18-10-9-17-7-6-8-22(29)26(17,4)20(18)11-13-24(19,28)2/h6-7,9,16,18-21,23,30-33H,8,10-15H2,1-5H3/t16-,18+,19+,20+,21-,23?,24+,25-,26+,27-,28+/m1/s1	HFILPRZCFAYICH-FGNMPWMKSA-N	Solanum capsicoides	2015	10.1039/c5ra12014d	50
144	Baimantuoluoline V	C28H38O4	438.277	438.608	O=C(CC=C1)[C@@]2(C)C1=CC[C@]3([H])[C@]2([H])CC[C@@]4(C)[C@@]3([H])CC[C@]4([H])[C@H](CO)[C@]5([H])OC(C(C)=C(C)C5)=O	InChI=1S/C28H38O4/c1-16-14-24(32-26(31)17(16)2)20(15-29)22-11-10-21-19-9-8-18-6-5-7-25(30)28(18,4)23(19)12-13-27(21,22)3/h5-6,8,19-24,29H,7,9-15H2,1-4H3/t19-,20-,21-,22+,23-,24+,27-,28-/m0/s1	CBVGICHOQQMFJQ-YGYCQHNTSA-N	Datura metel L.	2020	10.1016/j.fitote.2019.104468	89
145	Withacoagulin I	C28H38O7	486.262	486.605	O=C(CC=C1)[C@@]2(C)C1=CC[C@]3([H])[C@]2([H])CC[C@@]4(C)[C@]3(O)CC[C@@]4([C@@]([C@]5([H])OC(C(CO)=C(C)C5)=O)(C)O)O	InChI=1S/C28H38O7/c1-16-14-22(35-23(31)18(16)15-29)26(4,32)28(34)13-12-27(33)20-9-8-17-6-5-7-21(30)25(17,3)19(20)10-11-24(27,28)2/h5-6,8,19-20,22,29,32-34H,7,9-15H2,1-4H3/t19-,20+,22+,24-,25-,26-,27-,28+/m0/s1	BAIDVXUGHJDBOO-IMANIDBLSA-N	Withania coagulans	2013	10.1021/np300534x	73
146	Withacoagulide D	C28H38O6	470.267	470.606	O=C(CC=C1)[C@@]2(C)C1=CC[C@]3([H])[C@]2([H])CC[C@@]4(C)[C@@]3(CC[C@]4(O)[C@@]([C@]5([H])OC(C(C)=C(C)C5)=O)(C)O)O	InChI=1S/C28H38O6/c1-16-15-22(34-23(30)17(16)2)26(5,31)28(33)14-13-27(32)20-10-9-18-7-6-8-21(29)25(18,4)19(20)11-12-24(27,28)3/h6-7,9,19-20,22,31-33H,8,10-15H2,1-5H3/t19-,20+,22+,24-,25-,26-,27-,28+/m0/s1	HYSIDFWCYWFQMQ-IMANIDBLSA-N	Withania coagulans	2012	10.1248/cpb.c12-00264	96
147	(22R)-27-hydroxy-7α-methoxy-1-oxowitha-3,5,24-trienolide	C29H40O5	468.288	468.634	O=C(CC=C1)[C@@]2(C)C1=C[C@@H](OC)[C@]3([H])[C@]2([H])CC[C@@]4(C)[C@@]3([H])CC[C@]4([H])[C@@H]([C@]5([H])OC(C(CO)=C(C)C5)=O)C	InChI=1S/C29H40O5/c1-16-13-23(34-27(32)19(16)15-30)17(2)20-9-10-21-26-22(11-12-28(20,21)3)29(4)18(14-24(26)33-5)7-6-8-25(29)31/h6-7,14,17,20-24,26,30H,8-13,15H2,1-5H3/t17-,20+,21-,22-,23+,24?,26-,28+,29-/m0/s1	JOGIQJMBLQWDHC-PKEJMJHNSA-N	Datura stramonium L.	2013	10.1080/14786419.2013.800981	85
148	(22R)-27-hydroxy-7α-methoxy-1-oxowitha-3,5,24-trienolide 27-O-β-D-glucopyranoside	C35H50O10	630.34	630.775	O=C(CC=C1)[C@@]2(C)C1=C[C@@H](OC)[C@]3([H])[C@]2([H])CC[C@@]4(C)[C@@]3([H])CC[C@]4([H])[C@@H]([C@]5([H])OC(C(CO[C@@H]([C@@H]6O)O[C@H](CO)[C@@H](O)[C@@H]6O)=C(C)C5)=O)C	InChI=1S/C35H50O10/c1-17-13-24(44-32(41)20(17)16-43-33-31(40)30(39)29(38)26(15-36)45-33)18(2)21-9-10-22-28-23(11-12-34(21,22)3)35(4)19(14-25(28)42-5)7-6-8-27(35)37/h6-7,14,18,21-26,28-31,33,36,38-40H,8-13,15-16H2,1-5H3/t18-,21+,22-,23-,24+,25?,26+,28-,29+,30-,31+,33+,34+,35-/m0/s1	ZDAXEWQIILHBCD-XYDJQLGBSA-N	Datura stramonium L.	2013	10.1080/14786419.2013.800981	85
149	Daturafoliside I	C34H48O10	616.325	616.748	O=C(CC=C1)[C@@]2(C)C1=CC[C@]3([H])[C@]2([H])CC[C@@]4(C)[C@]3(CC[C@]4(O)[C@@H]([C@]5([H])OC(C(CO[C@@H]([C@@H]6O)O[C@H](CO)[C@@H](O)[C@@H]6O)=C(C)C5)=O)C)[H]	InChI=1S/C34H48O10/c1-17-14-24(43-30(40)21(17)16-42-31-29(39)28(38)27(37)25(15-35)44-31)18(2)34(41)13-11-22-20-9-8-19-6-5-7-26(36)33(19,4)23(20)10-12-32(22,34)3/h5-6,8,18,20,22-25,27-29,31,35,37-39,41H,7,9-16H2,1-4H3/t18-,20+,22+,23+,24-,25-,27-,28+,29-,31-,32+,33+,34+/m1/s1	OBZOQUYYUPEHJM-LMPBHGBFSA-N	Datura metel L.	2014	10.1016/j.steroids.2014.05.003	87
150	Daturmetelide Q	C34H48O9	600.33	600.749	[H][C@]12[C@@]([C@]([H])(CC[C@]3([H])[C@@H](C4OC(C(CO[C@@H]([C@@H]5O)O[C@H](CO)[C@@H](O)[C@@H]5O)=C(C)C4)=O)C)[C@]3(C)CC2)([H])CC=C([C@]61C)C=CCC6=O	InChI=1S/C34H48O9/c1-17-14-25(42-31(40)21(17)16-41-32-30(39)29(38)28(37)26(15-35)43-32)18(2)22-10-11-23-20-9-8-19-6-5-7-27(36)34(19,4)24(20)12-13-33(22,23)3/h5-6,8,18,20,22-26,28-30,32,35,37-39H,7,9-16H2,1-4H3/t18-,20-,22+,23-,24-,25?,26+,28+,29-,30+,32+,33+,34-/m0/s1	BJRHXJYBUPRYBR-ZOMDGWCMSA-N	Datura metel L.	2020	10.1016/j.bioorg.2019.103541	82
151	Peruvianolide A	C28H44O5	460.319	460.655	O[C@@H](C[C@H](O)C1)[C@@]2(C)C1=CC[C@]3([H])[C@]2([H])CC[C@@]4(C)[C@@]3([H])CC[C@]4([H])[C@@H]([C@]5([H])O[C@@H](O)[C@@](C)(O6)[C@]6(C)C5)C	InChI=1S/C28H44O5/c1-15(22-14-26(3)28(5,33-26)24(31)32-22)19-8-9-20-18-7-6-16-12-17(29)13-23(30)27(16,4)21(18)10-11-25(19,20)2/h6,15,17-24,29-31H,7-14H2,1-5H3/t15-,17+,18-,19+,20-,21-,22+,23-,24+,25+,26-,27-,28+/m0/s1	QCHLGMFKCVCHJR-HYTBMKETSA-N	Physalis peruviana	2014	10.1016/j.steroids.2014.05.003	28
152	Dmetelin A	C28H40O5	456.288	456.623	O=C(CCC1)[C@@]2(C)C1=C[C@@H](O)[C@]3([H])[C@]2([H])CC[C@@]4(C)[C@]3(CC[C@]4([H])[C@@H]([C@]5([H])OC(C(CO)=C(C)C5)=O)C)[H]	InChI=1S/C28H40O5/c1-15-12-23(33-26(32)18(15)14-29)16(2)19-8-9-20-25-21(10-11-27(19,20)3)28(4)17(13-22(25)30)6-5-7-24(28)31/h13,16,19-23,25,29-30H,5-12,14H2,1-4H3/t16-,19+,20-,21-,22+,23+,25-,27+,28-/m0/s1	OOSRDXJGKCCCNG-NQNHUYFBSA-N	Datura metel L.	2014	10.3390/molecules19044548	80
153	Baimantuoluoline K	C28H42O6	474.298	474.638	O[C@@H](C[C@H](O)C1)[C@@]2(C)C1=C[C@@H](O)[C@]3([H])[C@]2([H])CC[C@@]4(C)[C@]3(CC[C@]4([H])[C@@H]([C@]5([H])OC(C(CO)=C(C)C5)=O)C)[H]	InChI=1S/C28H42O6/c1-14-9-23(34-26(33)18(14)13-29)15(2)19-5-6-20-25-21(7-8-27(19,20)3)28(4)16(11-22(25)31)10-17(30)12-24(28)32/h11,15,17,19-25,29-32H,5-10,12-13H2,1-4H3/t15-,17+,19+,20-,21-,22+,23+,24-,25-,27+,28-/m0/s1	NTVSNJOJVVAQCN-CJYPWOJVSA-N	Datura metel L.	2014	10.1016/j.phytol.2014.02.008	118
154	Daturmetelide L	C28H42O6	474.298	474.638	O[C@@H](C[C@H](O)C1)[C@@]2(C)C1=C[C@@H](O)[C@]3([H])[C@]2([H])CC[C@@]4(C)[C@@]3([H])CC[C@]4([H])[C@H](C)[C@]5([H])OC(C(C)=C(CO)C5)=O	InChI=1S/C28H42O6/c1-14-16(13-29)9-23(34-26(14)33)15(2)19-5-6-20-25-21(7-8-27(19,20)3)28(4)17(11-22(25)31)10-18(30)12-24(28)32/h11,15,18-25,29-32H,5-10,12-13H2,1-4H3/t15-,18+,19+,20-,21-,22+,23+,24-,25-,27+,28-/m0/s1	REBYUTOEAMLXMO-LVDHJTTRSA-N	Datura metel L.	2020	10.1016/j.bioorg.2019.103541	82
155	Daturmetelide M	C29H44O5	472.319	472.666	O[C@@H](C[C@H](O)C1)[C@@]2(C)C1=C[C@@H](OC)[C@]3([H])[C@]2([H])CC[C@@]4(C)[C@@]3([H])CC[C@]4([H])[C@H](C)[C@]5([H])OC(C(C)=C(C)C5)=O	InChI=1S/C29H44O5/c1-15-11-23(34-27(32)16(15)2)17(3)20-7-8-21-26-22(9-10-28(20,21)4)29(5)18(13-24(26)33-6)12-19(30)14-25(29)31/h13,17,19-26,30-31H,7-12,14H2,1-6H3/t17-,19+,20+,21-,22-,23+,24?,25-,26-,28+,29-/m0/s1	DUMYGECHKZKGRD-SPDGNPCZSA-N	Datura metel L.	2020	10.1016/j.bioorg.2019.103541	82
156	Baimantuoluoline W	C28H42O5	458.303	458.639	O[C@@H](C[C@H](O)C1)[C@@]2(C)C1=CC[C@]3([H])[C@]2([H])CC[C@@]4(C)[C@@]3([H])CC[C@]4([H])[C@H](CO)[C@]5([H])OC(C(C)=C(C)C5)=O	InChI=1S/C28H42O5/c1-15-11-24(33-26(32)16(15)2)20(14-29)22-8-7-21-19-6-5-17-12-18(30)13-25(31)28(17,4)23(19)9-10-27(21,22)3/h5,18-25,29-31H,6-14H2,1-4H3/t18-,19+,20+,21+,22-,23+,24-,25+,27+,28+/m1/s1	NDVBFUCQZANIAO-LIQPNTCCSA-N	Datura metel L.	2020	10.1016/j.fitote.2019.104468	89
157	Baimantuoluoline X	C30H46O6	502.329	502.692	O[C@@H](C[C@H](O)C1)[C@@]2(C)C1=CC[C@]3([H])[C@]2([H])CC[C@@]4(C)[C@@]3([H])CC[C@]4([H])[C@H](CO)[C@]5([H])OC(C(COCC)=C(C)C5)=O	InChI=1S/C30H46O6/c1-5-35-16-22-17(2)12-26(36-28(22)34)21(15-31)24-9-8-23-20-7-6-18-13-19(32)14-27(33)30(18,4)25(20)10-11-29(23,24)3/h6,19-21,23-27,31-33H,5,7-16H2,1-4H3/t19-,20+,21+,23+,24-,25+,26-,27+,29+,30+/m1/s1	GEFZERFUEDSZIB-ZUJRTWFPSA-N	Datura metel L.	2020	10.1016/j.fitote.2019.104468	89
158	Daturafoliside O	C30H44O6	500.314	500.676	O=C(C[C@H](OCC)C1)[C@@]2(C)C1=C[C@@H](O)[C@]3([H])[C@]2([H])CC[C@@]4(C)[C@@]3([H])CC[C@]4([H])[C@@H]([C@]5([H])OC(C(CO)=C(C)C5)=O)C	InChI=1S/C30H44O6/c1-6-35-19-12-18-13-24(32)27-22-8-7-21(17(3)25-11-16(2)20(15-31)28(34)36-25)29(22,4)10-9-23(27)30(18,5)26(33)14-19/h13,17,19,21-25,27,31-32H,6-12,14-15H2,1-5H3/t17-,19?,21+,22-,23-,24+,25+,27-,29+,30-/m0/s1	LUYOVNMGHLGQPJ-OBAOSMAESA-N	Datura metel L.	2018	10.1016/j.phytochem.2018.08.005	88
159	Baimantuoluoside J	C36H56O11	664.382	664.833	O[C@@H](C[C@H](O[C@@H]([C@@H]1O)O[C@H](CO)[C@@H](O)[C@@H]1O)C2)[C@@]3(C)C2=CC[C@]4([H])[C@]3([H])CC[C@@]5(C)[C@@]4([H])CC[C@]5([H])[C@H](CO)[C@]6([H])OC(C(COCC)=C(C)C6)=O	InChI=1S/C36H56O11/c1-5-44-17-23-18(2)12-27(46-33(23)43)22(15-37)25-9-8-24-21-7-6-19-13-20(45-34-32(42)31(41)30(40)28(16-38)47-34)14-29(39)36(19,4)26(21)10-11-35(24,25)3/h6,20-22,24-32,34,37-42H,5,7-17H2,1-4H3/t20-,21+,22+,24+,25-,26+,27-,28-,29+,30-,31+,32-,34-,35+,36+/m1/s1	QSCQNSMZFWFVIV-YYSZCOGYSA-N	Datura metel L.	2020	10.1016/j.fitote.2019.104468	89
160	Daturmetelide N	C34H52O10	620.356	620.78	O[C@@H](C[C@H](O[C@@H]([C@@H]1O)O[C@H](CO)[C@@H](O)[C@@H]1O)C2)[C@@]3(C)C2=C[C@@H](O)[C@]4([H])[C@]3([H])CC[C@@]5(C)[C@]4(CC[C@]5([H])[C@@H]([C@]6([H])OC(C(C)=C(C)C6)=O)C)[H]	InChI=1S/C34H52O10/c1-15-10-24(43-31(41)16(15)2)17(3)20-6-7-21-27-22(8-9-33(20,21)4)34(5)18(12-23(27)36)11-19(13-26(34)37)42-32-30(40)29(39)28(38)25(14-35)44-32/h12,17,19-30,32,35-40H,6-11,13-14H2,1-5H3/t17-,19+,20+,21-,22-,23+,24+,25+,26-,27-,28+,29-,30+,32+,33+,34-/m0/s1	QAUFREXELFNJAQ-FXSOCQIRSA-N	Datura metel L.	2020	10.1016/j.bioorg.2019.103541	82
161	Daturafoliside A	C34H52O11	636.351	636.779	O[C@@H](C[C@H](O[C@@H]([C@@H]1O)O[C@H](CO)[C@@H](O)[C@@H]1O)C2)[C@@]3(C)C2=C[C@@H](O)[C@]4([H])[C@]3([H])CC[C@@]5(C)[C@]4(CC[C@]5([H])[C@@H]([C@]6([H])OC(C(C)=C(CO)C6)=O)C)[H]	InChI=1S/C34H52O11/c1-15-17(13-35)9-24(44-31(15)42)16(2)20-5-6-21-27-22(7-8-33(20,21)3)34(4)18(11-23(27)37)10-19(12-26(34)38)43-32-30(41)29(40)28(39)25(14-36)45-32/h11,16,19-30,32,35-41H,5-10,12-14H2,1-4H3/t16-,19+,20+,21-,22-,23+,24+,25+,26-,27-,28+,29-,30+,32+,33+,34-/m0/s1	OWXPXPRZSAZNHT-AUKUPYCNSA-N	Datura metel L.	2014	10.1016/j.steroids.2014.05.003	87
162	Daturafoliside B	C35H54O11	650.367	650.806	O[C@@H](C[C@H](O[C@@H]([C@@H]1O)O[C@H](CO)[C@@H](O)[C@@H]1O)C2)[C@@]3(C)C2=C[C@@H](OC)[C@]4([H])[C@]3([H])CC[C@@]5(C)[C@]4(CC[C@]5([H])[C@@H]([C@]6([H])OC(C(C)=C(CO)C6)=O)C)[H]	InChI=1S/C35H54O11/c1-16-18(14-36)10-24(45-32(16)42)17(2)21-6-7-22-28-23(8-9-34(21,22)3)35(4)19(12-25(28)43-5)11-20(13-27(35)38)44-33-31(41)30(40)29(39)26(15-37)46-33/h12,17,20-31,33,36-41H,6-11,13-15H2,1-5H3/t17-,20+,21+,22-,23-,24+,25?,26+,27-,28-,29+,30-,31+,33+,34+,35-/m0/s1	QGAQAXBOVALDHJ-RIPIDSLDSA-N	Datura metel L.	2014	10.1016/j.steroids.2014.05.003	87
163	Daturafoliside C	C34H52O11	636.351	636.779	O[C@@H](C[C@H](O[C@@H]([C@@H]1O)O[C@H](CO)[C@@H](O)[C@@H]1O)C2)[C@@]3(C)C2=C[C@H](O)[C@]4([H])[C@]3([H])CC[C@@]5(C)[C@]4(CC[C@]5([H])[C@@H]([C@]6([H])OC(C(CO)=C(C)C6)=O)C)[H]	InChI=1S/C34H52O11/c1-15-9-24(44-31(42)19(15)13-35)16(2)20-5-6-21-27-22(7-8-33(20,21)3)34(4)17(11-23(27)37)10-18(12-26(34)38)43-32-30(41)29(40)28(39)25(14-36)45-32/h11,16,18,20-30,32,35-41H,5-10,12-14H2,1-4H3/t16-,18+,20+,21-,22-,23-,24+,25+,26-,27-,28+,29-,30+,32+,33+,34-/m0/s1	ONUZSIYVENIZOQ-WSJIXESKSA-N	Datura metel L.	2014	10.1016/j.steroids.2014.05.003	87
164	Daturafoliside E	C38H60O11	692.414	692.887	O[C@@H](C[C@H](O[C@@H]([C@@H]1O)O[C@H](CO)[C@@H](O)[C@@H]1O)C2)[C@@]3(C)C2=C[C@@H](OCCCC)[C@]4([H])[C@]3([H])CC[C@@]5(C)[C@]4(CC[C@]5([H])[C@@H]([C@]6([H])OC(C(CO)=C(C)C6)=O)C)[H]	InChI=1S/C38H60O11/c1-6-7-12-46-28-15-21-14-22(47-36-34(44)33(43)32(42)29(18-40)49-36)16-30(41)38(21,5)26-10-11-37(4)24(8-9-25(37)31(26)28)20(3)27-13-19(2)23(17-39)35(45)48-27/h15,20,22,24-34,36,39-44H,6-14,16-18H2,1-5H3/t20-,22+,24+,25-,26-,27+,28?,29+,30-,31-,32+,33-,34+,36+,37+,38-/m0/s1	LXNJAXZBTPWASL-PFLYZYRJSA-N	Datura metel L.	2014	10.1016/j.steroids.2014.05.003	87
165	Daturafoliside T	C34H52O11	636.351	636.779	O[C@@H](C[C@H](O[C@@H]([C@@H]1O)O[C@H](CO)[C@@H](O)[C@@H]1O)C2)[C@@]3(C)C2=C[C@@H](O)[C@]4([H])[C@]3([H])C[C@H](O)[C@@]5(C)[C@@]4([H])CC[C@]5([H])[C@@H]([C@]6([H])OC(C(C)=C(C)C6)=O)C	InChI=1S/C34H52O11/c1-14-8-23(44-31(42)15(14)2)16(3)19-6-7-20-27-21(12-26(38)34(19,20)5)33(4)17(10-22(27)36)9-18(11-25(33)37)43-32-30(41)29(40)28(39)24(13-35)45-32/h10,16,18-30,32,35-41H,6-9,11-13H2,1-5H3/t16-,18+,19+,20-,21-,22+,23+,24+,25-,26-,27-,28+,29-,30+,32+,33-,34+/m0/s1	ZCXSGVNBXVDSOE-PWQZIKJSSA-N	Datura metel L.	2018	10.1016/j.phytochem.2018.08.005	88
166	Daturafoliside F	C34H50O11	634.335	634.763	O=C(C[C@@H](O)C1)[C@@]2(C)C1=C[C@@H](O)[C@]3([H])[C@]2([H])CC[C@@]4(C)[C@]3(CC[C@]4([H])[C@@H]([C@]5([H])OC(C(CO[C@@H]([C@@H]6O)O[C@H](CO)[C@@H](O)[C@@H]6O)=C(C)C5)=O)C)[H]	InChI=1S/C34H50O11/c1-15-9-24(44-31(42)19(15)14-43-32-30(41)29(40)28(39)25(13-35)45-32)16(2)20-5-6-21-27-22(7-8-33(20,21)3)34(4)17(11-23(27)37)10-18(36)12-26(34)38/h11,16,18,20-25,27-30,32,35-37,39-41H,5-10,12-14H2,1-4H3/t16-,18-,20+,21-,22-,23+,24+,25+,27-,28+,29-,30+,32+,33+,34-/m0/s1	NJONCYQRNYIREF-XUCYFOSDSA-N	Datura metel L.	2014	10.1016/j.steroids.2014.05.003	87
167	Daturafoliside G	C35H52O11	648.351	648.79	O=C(C[C@H](OC)C1)[C@@]2(C)C1=C[C@@H](O)[C@]3([H])[C@]2([H])CC[C@@]4(C)[C@]3(CC[C@]4([H])[C@@H]([C@]5([H])OC(C(CO[C@@H]([C@@H]6O)O[C@H](CO)[C@@H](O)[C@@H]6O)=C(C)C5)=O)C)[H]	InChI=1S/C35H52O11/c1-16-10-25(45-32(42)20(16)15-44-33-31(41)30(40)29(39)26(14-36)46-33)17(2)21-6-7-22-28-23(8-9-34(21,22)3)35(4)18(12-24(28)37)11-19(43-5)13-27(35)38/h12,17,19,21-26,28-31,33,36-37,39-41H,6-11,13-15H2,1-5H3/t17-,19?,21+,22-,23-,24+,25+,26+,28-,29+,30-,31+,33+,34+,35-/m0/s1	BKDRJZPZHBFDLI-VGVNDYBNSA-N	Datura metel L.	2014	10.1016/j.steroids.2014.05.003	87
168	Daturafoliside H	C38H58O11	690.398	690.871	O=C(C[C@H](OCCCC)C1)[C@@]2(C)C1=C[C@@H](O)[C@]3([H])[C@]2([H])CC[C@@]4(C)[C@]3(CC[C@]4([H])[C@@H]([C@]5([H])OC(C(CO[C@@H]([C@@H]6O)O[C@H](CO)[C@@H](O)[C@@H]6O)=C(C)C5)=O)C)[H]	InChI=1S/C38H58O11/c1-6-7-12-46-22-14-21-15-27(40)31-25-9-8-24(37(25,4)11-10-26(31)38(21,5)30(41)16-22)20(3)28-13-19(2)23(35(45)48-28)18-47-36-34(44)33(43)32(42)29(17-39)49-36/h15,20,22,24-29,31-34,36,39-40,42-44H,6-14,16-18H2,1-5H3/t20-,22?,24+,25-,26-,27+,28+,29+,31-,32+,33-,34+,36+,37+,38-/m0/s1	YPTHDRKFFNREFA-DEBIQOESSA-N	Datura metel L.	2014	10.1016/j.steroids.2014.05.003	87
169	Daturafoliside N	C34H50O11	634.335	634.763	O=C(C[C@H](O)C1)[C@@]2(C)C1=C[C@@H](O)[C@]3([H])[C@]2([H])CC[C@@]4(C)[C@@]3([H])CC[C@]4([H])[C@@H]([C@]5([H])OC(C(CO[C@@H]([C@@H]6O)O[C@H](CO)[C@@H](O)[C@@H]6O)=C(C)C5)=O)C	InChI=1S/C34H50O11/c1-15-9-24(44-31(42)19(15)14-43-32-30(41)29(40)28(39)25(13-35)45-32)16(2)20-5-6-21-27-22(7-8-33(20,21)3)34(4)17(11-23(27)37)10-18(36)12-26(34)38/h11,16,18,20-25,27-30,32,35-37,39-41H,5-10,12-14H2,1-4H3/t16-,18+,20+,21-,22-,23+,24+,25+,27-,28+,29-,30+,32+,33+,34-/m0/s1	NJONCYQRNYIREF-JLOPTXEASA-N	Datura metel L.	2018	10.1016/j.phytochem.2018.08.005	88
170	Daturafoliside P	C34H50O11	634.335	634.763	O=C(C[C@H](O)C1)[C@@]2(C)C1=C[C@H](O)[C@]3([H])[C@]2([H])CC[C@@]4(C)[C@@]3([H])CC[C@]4([H])[C@@H]([C@]5([H])OC(C(CO[C@@H]([C@@H]6O)O[C@H](CO)[C@@H](O)[C@@H]6O)=C(C)C5)=O)C	InChI=1S/C34H50O11/c1-15-9-24(44-31(42)19(15)14-43-32-30(41)29(40)28(39)25(13-35)45-32)16(2)20-5-6-21-27-22(7-8-33(20,21)3)34(4)17(11-23(27)37)10-18(36)12-26(34)38/h11,16,18,20-25,27-30,32,35-37,39-41H,5-10,12-14H2,1-4H3/t16-,18+,20+,21-,22-,23-,24+,25+,27-,28+,29-,30+,32+,33+,34-/m0/s1	NJONCYQRNYIREF-SCHVYIGZSA-N	Datura metel L.	2018	10.1016/j.phytochem.2018.08.005	88
171	Daturafoliside Q	C34H50O10	618.34	618.764	O=C(C[C@@H](O)C1)[C@@]2(C)C1=CC[C@]3([H])[C@]2([H])CC[C@@]4(C)[C@@]3([H])CC[C@]4([H])[C@@H]([C@]5([H])OC(C(CO[C@@H]([C@@H]6O)O[C@H](CO)[C@@H](O)[C@@H]6O)=C(C)C5)=O)C	InChI=1S/C34H50O10/c1-16-11-25(43-31(41)21(16)15-42-32-30(40)29(39)28(38)26(14-35)44-32)17(2)22-7-8-23-20-6-5-18-12-19(36)13-27(37)34(18,4)24(20)9-10-33(22,23)3/h5,17,19-20,22-26,28-30,32,35-36,38-40H,6-15H2,1-4H3/t17-,19-,20-,22+,23-,24-,25+,26+,28+,29-,30+,32+,33+,34-/m0/s1	QIYBGOVAUNFLKE-LUKFAPDQSA-N	Datura metel L.	2018	10.1016/j.phytochem.2018.08.005	88
172	Daturafoliside U	C40H62O15	782.409	782.921	[H][C@]12[C@@]([C@@](CC[C@]3([H])[C@@H]([C@]4([H])OC(C(CO[C@@H]([C@@H]5O)O[C@H](CO)[C@@H](O)[C@@H]5O)=C(C)C4)=O)C)([H])[C@]3(C)CC2)([H])[C@H](O)C=C6C[C@@H](O[C@@H]([C@@H]7O)O[C@H](CO)[C@@H](O)[C@@H]7O)CC[C@@]61C	InChI=1S/C40H62O15/c1-17-11-26(53-36(50)21(17)16-51-37-34(48)32(46)30(44)27(14-41)54-37)18(2)22-5-6-23-29-24(8-10-40(22,23)4)39(3)9-7-20(12-19(39)13-25(29)43)52-38-35(49)33(47)31(45)28(15-42)55-38/h13,18,20,22-35,37-38,41-49H,5-12,14-16H2,1-4H3/t18-,20-,22+,23-,24-,25+,26+,27+,28+,29-,30+,31+,32-,33-,34+,35+,37+,38+,39-,40+/m0/s1	TUIITFSFIKVKFF-AROPQGEQSA-N	Datura metel L.	2018	10.1016/j.phytochem.2018.08.005	88
173	Daturafoliside V	C40H62O16	798.404	798.92	O[C@@H](C[C@H](O[C@@H]([C@@H]1O)O[C@H](CO)[C@@H](O)[C@@H]1O)C2)[C@@]3(C)C2=C[C@@H](O)[C@]4([H])[C@]3([H])CC[C@@]5(C)[C@@]4([H])CC[C@]5([H])[C@@H]([C@]6([H])OC(C(CO[C@@H]([C@@H]7O)O[C@H](CO)[C@@H](O)[C@@H]7O)=C(C)C6)=O)C	InChI=1S/C40H62O16/c1-16-9-25(54-36(51)20(16)15-52-37-34(49)32(47)30(45)26(13-41)55-37)17(2)21-5-6-22-29-23(7-8-39(21,22)3)40(4)18(11-24(29)43)10-19(12-28(40)44)53-38-35(50)33(48)31(46)27(14-42)56-38/h11,17,19,21-35,37-38,41-50H,5-10,12-15H2,1-4H3/t17-,19+,21+,22-,23-,24+,25+,26+,27+,28-,29-,30+,31+,32-,33-,34+,35+,37+,38+,39+,40-/m0/s1	KKRDDRNAAOATTB-DYQMYVODSA-N	Datura metel L.	2017	10.1177/1934578X1701200705	90
174	Daturafoliside D	C40H62O16	798.404	798.92	O[C@@H](C[C@H](O[C@@H]([C@@H]1O)O[C@H](CO)[C@@H](O)[C@@H]1O)C2)[C@@]3(C)C2=C[C@H](O)[C@]4([H])[C@]3([H])CC[C@@]5(C)[C@]4(CC[C@]5([H])[C@@H]([C@]6([H])OC(C(CO[C@@H]([C@@H]7O)O[C@H](CO)[C@@H](O)[C@@H]7O)=C(C)C6)=O)C)[H]	InChI=1S/C40H62O16/c1-16-9-25(54-36(51)20(16)15-52-37-34(49)32(47)30(45)26(13-41)55-37)17(2)21-5-6-22-29-23(7-8-39(21,22)3)40(4)18(11-24(29)43)10-19(12-28(40)44)53-38-35(50)33(48)31(46)27(14-42)56-38/h11,17,19,21-35,37-38,41-50H,5-10,12-15H2,1-4H3/t17-,19+,21+,22-,23-,24-,25+,26+,27+,28-,29-,30+,31+,32-,33-,34+,35+,37+,38+,39+,40-/m0/s1	KKRDDRNAAOATTB-HHNVRJINSA-N	Datura metel L.	2014	10.1016/j.steroids.2014.05.003	87
175	Trichoside A	C34H48O12	648.315	648.746	O=C(C[C@H](O[C@@H]([C@@H]1O)O[C@H](CO)[C@@H](O)[C@@H]1O)C2)[C@@]3(C)C2=CC[C@]4([H])[C@]3([H])CC[C@@]5(C)[C@@]46C[C@@H](O6)[C@]5(O)[C@@]([C@]7([H])OC(C(C)=C(C)C7)=O)(C)O	InChI=1S/C34H48O12/c1-15-10-23(45-28(40)16(15)2)32(5,41)34(42)24-13-33(46-24)20-7-6-17-11-18(43-29-27(39)26(38)25(37)21(14-35)44-29)12-22(36)31(17,4)19(20)8-9-30(33,34)3/h6,18-21,23-27,29,35,37-39,41-42H,7-14H2,1-5H3/t18-,19+,20-,21-,23-,24-,25-,26+,27-,29-,30+,31+,32+,33-,34-/m1/s1	QVIMTCXVNFITOB-SVDMSWNSSA-N	Tricholepis eburnea	2015	10.1080/14786419.2015.1030340	91
176	Withalongolide I	C34H50O11	634.335	634.763	O=C(C[C@H](O[C@@H]([C@@H]1O)O[C@H](CO)[C@@H](O)[C@@H]1O)C2)[C@@]3(CO)C2=CC[C@]4([H])[C@]3([H])CC[C@@]5(C)C4CC[C@]5([H])[C@@H]([C@]6([H])OC(C(CO)=C(C)C6)=O)C	InChI=1S/C34H50O11/c1-16-10-25(44-31(42)21(16)13-35)17(2)22-6-7-23-20-5-4-18-11-19(43-32-30(41)29(40)28(39)26(14-36)45-32)12-27(38)34(18,15-37)24(20)8-9-33(22,23)3/h4,17,19-20,22-26,28-30,32,35-37,39-41H,5-15H2,1-3H3/t17-,19+,20-,22+,23?,24-,25+,26+,28+,29-,30+,32+,33+,34-/m0/s1	PRNFAKRMKREHJM-BZESMUPNSA-N	Physalis longifolia	2011	10.1021/np200635r	38
177	Withalongolide J	C34H52O11	636.351	636.779	O[C@@H](C[C@H](O)C1)[C@@]2(CO)C1=CC[C@]3([H])[C@]2([H])CC[C@@]4(C)C3CC[C@@]4([C@@H]([C@]5([H])OC(C(C)=C(CO[C@@H]([C@@H]6O)O[C@H](CO)[C@@H](O)[C@@H]6O)C5)=O)C)[H]	InChI=1S/C34H52O11/c1-16-18(14-43-32-30(41)29(40)28(39)26(13-35)45-32)10-25(44-31(16)42)17(2)22-6-7-23-21-5-4-19-11-20(37)12-27(38)34(19,15-36)24(21)8-9-33(22,23)3/h4,17,20-30,32,35-41H,5-15H2,1-3H3/t17-,20+,21-,22+,23?,24-,25+,26+,27-,28+,29-,30+,32+,33+,34-/m0/s1	JDYYLQIQTRWVFW-UILXURKRSA-N	Physalis longifolia	2011	10.1021/np200635r	38
178	Plantagiolide M	C28H44O6	476.314	476.654	O[C@@H](C[C@H](O)C1)[C@@]2(C)C1=C[C@@H](O)[C@]3([H])[C@]2([H])CC[C@@]4(C)[C@]3(CC[C@]4([H])[C@@H]([C@]5([H])OC([C@H](C)[C@@](O)(C)C5)=O)C)[H]	InChI=1S/C28H44O6/c1-14(22-13-27(4,33)15(2)25(32)34-22)18-6-7-19-24-20(8-9-26(18,19)3)28(5)16(11-21(24)30)10-17(29)12-23(28)31/h11,14-15,17-24,29-31,33H,6-10,12-13H2,1-5H3/t14-,15-,17+,18+,19-,20-,21+,22+,23-,24-,26+,27+,28-/m0/s1	GWWAMOYQQGUVQZ-GIBAQIMZSA-N	Tacca plantaginea	2015	10.1016/j.fitote.2015.06.015	92
179	Plantagiolide N	C34H54O11	638.367	638.795	O[C@@H](C[C@H](O)C1)[C@@]2(C)C1=C[C@@H](O[C@@H]([C@@H]3O)O[C@H](CO)[C@@H](O)[C@@H]3O)[C@]4([H])[C@]2([H])CC[C@@]5(C)[C@]4(CC[C@]5([H])[C@@H]([C@]6([H])OC([C@H](C)[C@@](O)(C)C6)=O)C)[H]	InChI=1S/C34H54O11/c1-15(23-13-33(4,42)16(2)30(41)43-23)19-6-7-20-26-21(8-9-32(19,20)3)34(5)17(10-18(36)12-25(34)37)11-22(26)44-31-29(40)28(39)27(38)24(14-35)45-31/h11,15-16,18-29,31,35-40,42H,6-10,12-14H2,1-5H3/t15-,16-,18+,19+,20-,21-,22+,23+,24+,25-,26-,27+,28-,29+,31+,32+,33+,34-/m0/s1	NNTYVRVZGUFVKV-DMZANWQESA-N	Tacca plantaginea	2015	10.1016/j.fitote.2015.06.015	92
180	Physapubescin E	C28H44O6	476.314	476.654	O[C@@H](C[C@H](O)C1)[C@@]2(C)C1=CC[C@]3([H])[C@]2([H])CC[C@@]4(C)[C@]3(CC[C@]4([H])[C@@H]([C@]5([H])OC([C@@](C)(O)[C@](O)(C)C5)=O)C)[H]	InChI=1S/C28H44O6/c1-15(22-14-26(3,32)28(5,33)24(31)34-22)19-8-9-20-18-7-6-16-12-17(29)13-23(30)27(16,4)21(18)10-11-25(19,20)2/h6,15,17-23,29-30,32-33H,7-14H2,1-5H3/t15-,17+,18-,19+,20-,21-,22+,23-,25+,26-,27-,28+/m0/s1	KHZWNIFOVRAADX-INIVLATKSA-N	Physalis pubescens L.	2016	10.1016/j.steroids.2016.09.002	25
181	Physapubescin F	C28H46O6	478.329	478.67	O[C@@H](C[C@H](O)C1)[C@@]2(C)C1=CC[C@]3([H])[C@]2([H])CC[C@@]4(C)[C@]3(CC[C@]4([H])[C@@H]([C@]5([H])OC(O)[C@@](C)(O)[C@@](O)(C)C5)C)[H]	InChI=1S/C28H46O6/c1-15(22-14-26(3,32)28(5,33)24(31)34-22)19-8-9-20-18-7-6-16-12-17(29)13-23(30)27(16,4)21(18)10-11-25(19,20)2/h6,15,17-24,29-33H,7-14H2,1-5H3/t15-,17+,18-,19+,20-,21-,22+,23-,24?,25+,26+,27-,28+/m0/s1	SAIGRYSDCINMIC-SMJHPVLSSA-N	Physalis pubescens L.	2016	10.1016/j.steroids.2016.09.002	25
182	(20S,22R,24R,25S,26R)-22,26-epoxy-24,26-dimethoxy-1α,3β,25-trihydroxyergost-5-ene	C30H50O6	506.361	506.724	O[C@@H](C[C@H](O)C1)[C@@]2(C)C1=CC[C@]3([H])[C@]2([H])CC[C@@]4(C)[C@]3(CC[C@]4([H])[C@@H]([C@]5([H])O[C@@H](OC)[C@@](C)(O)[C@](C)(OC)C5)C)[H]	InChI=1S/C30H50O6/c1-17(24-16-28(3,35-7)30(5,33)26(34-6)36-24)21-10-11-22-20-9-8-18-14-19(31)15-25(32)29(18,4)23(20)12-13-27(21,22)2/h8,17,19-26,31-33H,9-16H2,1-7H3/t17-,19+,20-,21+,22-,23-,24+,25-,26?,27+,28?,29-,30+/m0/s1	XOHVBCMBCWBJTC-SBKAYMRGSA-N	Physalis pubescens L.	2016	10.1016/j.steroids.2016.09.002	25
183	Physapubside A	C34H54O11	638.367	638.795	O[C@H]([C@@H](CO)O[C@@H](O[C@H](C1)C[C@H](O)[C@@]2(C)C1=CC[C@]3([H])[C@]2([H])CC[C@@]4(C)[C@]3(CC[C@]4([H])[C@@H]([C@]5([H])OC([C@@](C)(O)[C@](O)(C)C5)=O)C)[H])[C@@H]6O)[C@@H]6O	InChI=1S/C34H54O11/c1-16(23-14-32(3,41)34(5,42)30(40)45-23)20-8-9-21-19-7-6-17-12-18(43-29-28(39)27(38)26(37)24(15-35)44-29)13-25(36)33(17,4)22(19)10-11-31(20,21)2/h6,16,18-29,35-39,41-42H,7-15H2,1-5H3/t16-,18+,19-,20+,21-,22-,23+,24+,25-,26+,27-,28+,29+,31+,32-,33-,34+/m0/s1	OADYMVHEXPWGOZ-CKTIMABZSA-N	Physalis pubescens L.	2016	10.1016/j.steroids.2016.09.002	25
184	Physapubside B	C40H64O16	800.419	800.936	O[C@H]([C@@H](CO[C@@H]([C@@H]1O)O[C@H](CO)[C@@H](O)[C@@H]1O)O[C@@H](O[C@H](C2)C[C@H](O)[C@@]3(C)C2=CC[C@]4([H])[C@]3([H])CC[C@@]5(C)[C@]4(CC[C@]5([H])[C@@H]([C@]6([H])OC([C@@](C)(O)[C@](O)(C)C6)=O)C)[H])[C@@H]7O)[C@@H]7O	InChI=1S/C40H64O16/c1-17(24-14-38(3,50)40(5,51)36(49)56-24)21-8-9-22-20-7-6-18-12-19(13-27(42)39(18,4)23(20)10-11-37(21,22)2)53-35-33(48)31(46)29(44)26(55-35)16-52-34-32(47)30(45)28(43)25(15-41)54-34/h6,17,19-35,41-48,50-51H,7-16H2,1-5H3/t17-,19+,20-,21+,22-,23-,24+,25+,26+,27-,28+,29+,30-,31-,32+,33+,34+,35+,37+,38-,39-,40+/m0/s1	JIBDGMOJFJRXLF-MHYDUNGASA-N	Physalis pubescens L.	2016	10.1016/j.steroids.2016.09.002	25
185	Physapubside C	C40H66O16	802.435	802.952	O[C@H]([C@@H](CO[C@@H]([C@@H]1O)O[C@H](CO)[C@@H](O)[C@@H]1O)O[C@@H](O[C@H](C2)C[C@H](O)[C@@]3(C)C2=CC[C@]4([H])[C@]3([H])CC[C@@]5(C)[C@]4(CC[C@]5([H])[C@@H]([C@]6([H])OC(O)[C@@](C)(O)[C@@](O)(C)C6)C)[H])[C@@H]7O)[C@@H]7O	InChI=1S/C40H66O16/c1-17(24-14-38(3,50)40(5,51)36(49)56-24)21-8-9-22-20-7-6-18-12-19(13-27(42)39(18,4)23(20)10-11-37(21,22)2)53-35-33(48)31(46)29(44)26(55-35)16-52-34-32(47)30(45)28(43)25(15-41)54-34/h6,17,19-36,41-51H,7-16H2,1-5H3/t17-,19+,20-,21+,22-,23-,24+,25+,26+,27-,28+,29+,30-,31-,32+,33+,34+,35+,36?,37+,38+,39-,40+/m0/s1	GITNVGDVRLZYIL-GVGJYODMSA-N	Physalis pubescens L.	2016	10.1016/j.steroids.2016.09.002	25
186	(20S,22R,24R,25S,26R)-22,26-epoxy-24,26-dimethoxy-1α,3β,25-trihydroxyergost-5-ene 3-O-[β-D-glucopyranosyl(1-6)]-β-D-glucopyranoside	C42H70O16	830.466	831.006	O[C@H]([C@@H](CO[C@@H]([C@@H]1O)O[C@H](CO)[C@@H](O)[C@@H]1O)O[C@@H](O[C@H](C2)C[C@H](O)[C@@]3(C)C2=CC[C@]4([H])[C@]3([H])CC[C@@]5(C)[C@]4(CC[C@]5([H])[C@@H]([C@]6([H])O[C@@H](OC)[C@@](C)(O)[C@](C)(OC)C6)C)[H])[C@@H]7O)[C@@H]7O	InChI=1S/C42H70O16/c1-19(26-16-40(3,53-7)42(5,51)38(52-6)58-26)23-10-11-24-22-9-8-20-14-21(15-29(44)41(20,4)25(22)12-13-39(23,24)2)55-37-35(50)33(48)31(46)28(57-37)18-54-36-34(49)32(47)30(45)27(17-43)56-36/h8,19,21-38,43-51H,9-18H2,1-7H3/t19-,21+,22-,23+,24-,25-,26+,27+,28+,29-,30+,31+,32-,33-,34+,35+,36+,37+,38?,39+,40?,41-,42+/m0/s1	YYKGNYGQAQXABI-PMOQHQHSSA-N	Physalis pubescens L.	2016	10.1016/j.steroids.2016.09.002	25
187	27-Hydroxywithanolide K	C28H38O7	486.262	486.605	O=C(CC=C1)[C@@]2(C)C1=CC[C@]3([H])[C@]2([H])CC[C@@]4(C)[C@@]3(O)CC[C@]4(O)[C@@]([C@]5([H])OC(C(CO)=C(C)C5)=O)(C)O	InChI=1S/C28H38O7/c1-16-14-22(35-23(31)18(16)15-29)26(4,32)28(34)13-12-27(33)20-9-8-17-6-5-7-21(30)25(17,3)19(20)10-11-24(27,28)2/h5-6,8,19-20,22,29,32-34H,7,9-15H2,1-4H3/t19-,20+,22+,24-,25-,26-,27+,28+/m0/s1	BAIDVXUGHJDBOO-WEJNEFSASA-N	Withania coagulance	2016	10.1021/acs.jnatprod.5b00648	62	coagulin
188	27-Hydroxywithanolide I	C28H38O5	454.272	454.607	O=C(CC=C1)[C@@]2(C)C1=CC[C@]3([H])[C@]2([H])CC[C@@]4(C)[C@@]3(O)CC[C@]4([H])[C@@H]([C@]5([H])OC(C(CO)=C(C)C5)=O)C	InChI=1S/C28H38O5/c1-16-14-23(33-25(31)19(16)15-29)17(2)20-11-13-28(32)22-9-8-18-6-5-7-24(30)27(18,4)21(22)10-12-26(20,28)3/h5-6,8,17,20-23,29,32H,7,9-15H2,1-4H3/t17-,20+,21-,22+,23+,26+,27-,28+/m0/s1	NPWVUFJOAASMGS-ZAPSGPDISA-N	Withania coagulans (Stocks) Dunal	2016	10.1021/acs.jnatprod.5b00648	62	coagulin F
189	Withacoagulin F	C28H38O4	438.277	438.608	O=C(CC=C1)[C@@]2(C)C1=CC[C@]3([H])[C@]2([H])CC[C@@]4(C)[C@]3(O)CC[C@]4([H])[C@@H]([C@]5([H])OC(C(C)=C(C)C5)=O)C	InChI=1S/C28H38O4/c1-16-15-23(32-25(30)17(16)2)18(3)20-12-14-28(31)22-10-9-19-7-6-8-24(29)27(19,5)21(22)11-13-26(20,28)4/h6-7,9,18,20-23,31H,8,10-15H2,1-5H3/t18-,20+,21-,22+,23+,26+,27-,28-/m0/s1	PICSHTKPKZQIDB-MRJFOQAQSA-N	Withania coagulans (Stocks) Dunal	2016	10.1021/acs.jnatprod.5b00648	62	coagulin E
190	Withanolide H	C28H38O6	470.267	470.606	O=C(CC=C1)[C@@]2(C)C1=CC[C@]3([H])[C@]2([H])CC[C@@]4(C)[C@@]3(O)CC[C@]4([H])[C@@]([C@]5([H])OC(C(CO)=C(C)C5)=O)(C)O	InChI=1S/C28H38O6/c1-16-14-23(34-24(31)18(16)15-29)27(4,32)21-11-13-28(33)20-9-8-17-6-5-7-22(30)26(17,3)19(20)10-12-25(21,28)2/h5-6,8,19-21,23,29,32-33H,7,9-15H2,1-4H3/t19-,20+,21-,23+,25+,26-,27+,28+/m0/s1	DZDCMRGAFABKLR-HZRISEJCSA-N	Withania coagulans (Stocks) Dunal	2016	10.1021/acs.jnatprod.5b00648	62	coagulin B
191	Withacoagulin E	C28H38O5	454.272	454.607	O=C(CC=C1)[C@@]2(C)C1=CC[C@]3([H])[C@]2([H])CC[C@@]4(C)[C@]3(O)CC[C@]4([H])[C@@]([C@]5([H])OC(C(C)=C(C)C5)=O)(C)O	InChI=1S/C28H38O5/c1-16-15-23(33-24(30)17(16)2)27(5,31)21-12-14-28(32)20-10-9-18-7-6-8-22(29)26(18,4)19(20)11-13-25(21,28)3/h6-7,9,19-21,23,31-32H,8,10-15H2,1-5H3/t19-,20+,21-,23+,25+,26-,27+,28-/m0/s1	LEVWMALVAZUERI-XXMWMNJKSA-N	Withania coagulans (Stocks) Dunal	2016	10.1021/acs.jnatprod.5b00648	62	coagulin D
192	28-Hydroxywithacoagulin E	C28H38O6	470.267	470.606	O=C(CC=C1)[C@@]2(C)C1=CC[C@]3([H])[C@]2([H])CC[C@@]4(C)[C@]3(O)CC[C@]4([H])[C@@]([C@]5([H])OC(C(C)=C(CO)C5)=O)(C)O	InChI=1S/C28H38O6/c1-16-17(15-29)14-23(34-24(16)31)27(4,32)21-11-13-28(33)20-9-8-18-6-5-7-22(30)26(18,3)19(20)10-12-25(21,28)2/h5-6,8,19-21,23,29,32-33H,7,9-15H2,1-4H3/t19-,20+,21-,23+,25+,26-,27+,28-/m0/s1	CMYBEXMBTPRVQX-XXMWMNJKSA-N	Ajuga parviflora Benth.	2016	10.1021/acs.jnatprod.5b00648	62	28-hydroxycoagulin D
193	2,3-Dihydro-3β,27-dihydroxywithanolide I	C28H40O7	488.277	488.621	O=C(C[C@H](O)C1)[C@@]2(C)C1=CC[C@]3([H])[C@]2([H])CC[C@@]4(C)[C@@]3(O)CC[C@]4([H])[C@@]([C@]5([H])OC(C(CO)=C(C)C5)=O)(C)O	InChI=1S/C28H40O7/c1-15-11-23(35-24(32)18(15)14-29)27(4,33)21-8-10-28(34)20-6-5-16-12-17(30)13-22(31)26(16,3)19(20)7-9-25(21,28)2/h5,17,19-21,23,29-30,33-34H,6-14H2,1-4H3/t17-,19+,20-,21+,23-,25-,26+,27-,28-/m1/s1	RPUOZZLLWYFRDC-NYNCXJGOSA-N	Withania coagulans (Stocks) Dunal	2016	10.1021/acs.jnatprod.5b00648	62	coagulin J
194	2,3-Dihydro-3β-O-β-D-glucopyranosylwithanolide I	C34H50O11	634.335	634.763	O=C(C[C@H](O[C@@H]([C@@H]1O)O[C@H](CO)[C@@H](O)[C@@H]1O)C2)[C@@]3(C)C2=CC[C@]4([H])[C@]3([H])CC[C@@]5(C)[C@@]4(O)CC[C@]5([H])[C@@]([C@]6([H])OC(C(C)=C(C)C6)=O)(C)O	InChI=1S/C34H50O11/c1-16-12-25(45-29(40)17(16)2)33(5,41)23-9-11-34(42)21-7-6-18-13-19(43-30-28(39)27(38)26(37)22(15-35)44-30)14-24(36)32(18,4)20(21)8-10-31(23,34)3/h6,19-23,25-28,30,35,37-39,41-42H,7-15H2,1-5H3/t19-,20+,21-,22-,23+,25-,26-,27+,28-,30-,31-,32+,33-,34-/m1/s1	ZGFSMKCODQJWHY-DKZVLZAESA-N	Withania coagulans (Stocks) Dunal	2016	10.1021/acs.jnatprod.5b00648	62	coagulin K
195	14-Epicoagulin O	C34H50O11	634.335	634.763	C[C@]12C(C[C@@H](O[C@@H]([C@@H]3O)O[C@H](CO)[C@@H](O)[C@@H]3O)CC2=O)=CC[C@]4([H])[C@]1([H])CC[C@@]5(C)[C@]4(O)CC[C@]5([H])[C@@]([C@]6([H])OC(C(C)=C(C)C6)=O)(C)O	InChI=1S/C34H50O11/c1-16-12-25(45-29(40)17(16)2)33(5,41)23-9-11-34(42)21-7-6-18-13-19(43-30-28(39)27(38)26(37)22(15-35)44-30)14-24(36)32(18,4)20(21)8-10-31(23,34)3/h6,19-23,25-28,30,35,37-39,41-42H,7-15H2,1-5H3/t19-,20+,21-,22-,23+,25-,26-,27+,28-,30-,31-,32+,33-,34+/m1/s1	ZGFSMKCODQJWHY-OXZVIZELSA-N	Withania coagulans (Stocks) Dunal	2016	10.1021/acs.jnatprod.5b00648	62	coagulin O
196	14-Epicoagulansin B	C28H42O6	474.298	474.638	C[C@]12C(C[C@@H](O)CC2=O)=CC[C@]3([H])[C@]1([H])CC[C@@]4(C)[C@]3(O)CC[C@]4([H])[C@@]([C@]5([H])OC([C@@H]([C@@H](C)C5)C)=O)(C)O	InChI=1S/C28H42O6/c1-15-12-23(34-24(31)16(15)2)27(5,32)21-9-11-28(33)20-7-6-17-13-18(29)14-22(30)26(17,4)19(20)8-10-25(21,28)3/h6,15-16,18-21,23,29,32-33H,7-14H2,1-5H3/t15-,16+,18+,19-,20+,21-,23+,25+,26-,27+,28-/m0/s1	BXOOMEVXQLFLRI-IHMUVQFCSA-N	Withania coagulans (Stocks) Dunal	2016	10.1021/acs.jnatprod.5b00648	62,72	coagulansin B
197	Withacoagulin A	C28H36O5	452.256	452.591	C[C@]12C(C=CCC2=O)=CC[C@]3([H])[C@]1([H])CC[C@@]4(C)C3=CC[C@]4(O)[C@]([C@]5([H])OC(C(C)=C(C)C5)=O)(O)C	InChI=1S/C28H36O5/c1-16-15-23(33-24(30)17(16)2)27(5,31)28(32)14-12-20-19-10-9-18-7-6-8-22(29)26(18,4)21(19)11-13-25(20,28)3/h6-7,9,12,19,21,23,31-32H,8,10-11,13-15H2,1-5H3/t19-,21-,23+,25-,26-,27-,28+/m0/s1	IIFVFTBYLNRNON-UUKUVDNFSA-N	Withania coagulans (Stocks) Dunal	2016	10.1021/acs.jnatprod.5b00648	62	withacoagulin A
198	Withanolide P	C28H38O5	454.272	454.607	C[C@]12C(CC=CC2=O)=CC[C@]3([H])[C@]1([H])CC[C@@]4(C)[C@]3(O)CC[C@]4(O)[C@@H]([C@]5([H])OC(C(C)=C(C)C5)=O)C	InChI=1S/C28H38O5/c1-16-15-22(33-24(30)17(16)2)18(3)27(31)13-14-28(32)21-10-9-19-7-6-8-23(29)26(19,5)20(21)11-12-25(27,28)4/h6,8-9,18,20-22,31-32H,7,10-15H2,1-5H3/t18-,20+,21-,22-,25-,26+,27+,28+/m1/s1	KVGZFVWPWRXZRC-RMYITSQPSA-N	Withania somnifera (L.) Dunal	2016	10.1021/acs.jnatprod.5b00648	62	withanolide P
199	15α,18-Diacetoxy-28-hydroxy-17-epi-withanolide K	C32H42O11	602.273	602.677	O=C(CC=C1)[C@@]2(C)C1=CC[C@]3([H])[C@]2([H])CC[C@@]4(COC(C)=O)[C@@]3(O)[C@@H](OC(C)=O)C[C@@]4(O)[C@@]([C@]5([H])OC(C(C)=C(CO)C5)=O)(C)O	InChI=1S/C32H42O11/c1-17-20(15-33)13-25(43-27(17)37)29(5,38)31(39)14-26(42-19(3)35)32(40)23-10-9-21-7-6-8-24(36)28(21,4)22(23)11-12-30(31,32)16-41-18(2)34/h6-7,9,22-23,25-26,33,38-40H,8,10-16H2,1-5H3/t22-,23+,25+,26?,28-,29-,30-,31+,32-/m0/s1	JDXXZZNANWUAIK-NHQYQNJPSA-N	Physalis crassifolia	2016	10.1021/acs.jnatprod.5b00911	76
200	7β-Hydroxy-17-epi-withanolide K	C28H38O7	486.262	486.605	O=C(CC=C1)[C@@]2(C)C1=C[C@H](O)[C@]3([H])[C@]2([H])CC[C@@]4(C)[C@@]3(O)CC[C@@]4(O)[C@@]([C@]5([H])OC(C(C)=C(C)C5)=O)(C)O	InChI=1S/C28H38O7/c1-15-13-21(35-23(31)16(15)2)26(5,32)28(34)12-11-27(33)22-18(9-10-24(27,28)3)25(4)17(14-19(22)29)7-6-8-20(25)30/h6-7,14,18-19,21-22,29,32-34H,8-13H2,1-5H3/t18-,19-,21+,22-,24-,25-,26-,27+,28-/m0/s1	IXOQMAZQQAKZCH-NDBONZKESA-N	Physalis peruviana	2017	10.1021/acs.jnatprod.6b01129	32
201	7β-Hydroxywithanolide F	C28H38O7	486.262	486.605	O=C(C=CC1)[C@@]2(C)C1=C[C@H](O)[C@]3([H])[C@]2([H])CC[C@@]4(C)[C@@]3(O)CC[C@@]4(O)[C@@]([C@]5([H])OC(C(C)=C(C)C5)=O)(C)O	InChI=1S/C28H38O7/c1-15-13-21(35-23(31)16(15)2)26(5,32)28(34)12-11-27(33)22-18(9-10-24(27,28)3)25(4)17(14-19(22)29)7-6-8-20(25)30/h6,8,14,18-19,21-22,29,32-34H,7,9-13H2,1-5H3/t18-,19-,21+,22-,24-,25-,26-,27+,28-/m0/s1	ZPQINAJJLUVHTB-NDBONZKESA-N	Physalis peruviana	2017	10.1021/acs.jnatprod.6b01129	32
202	Orizabolide	C30H40O9	544.267	544.641	O=C(C=CC1)[C@@]2(C)C1=CC[C@]3([H])[C@]2([H])CC[C@@]4(COC(C)=O)[C@]3(CC[C@@]4(O)[C@@](C)(O)[C@]5([H])OC(C(C)=C(CO)C5)=O)O	InChI=1S/C30H40O9/c1-17-19(15-31)14-24(39-25(17)34)27(4,35)30(37)13-12-29(36)22-9-8-20-6-5-7-23(33)26(20,3)21(22)10-11-28(29,30)16-38-18(2)32/h5,7-8,21-22,24,31,35-37H,6,9-16H2,1-4H3/t21-,22+,24+,26-,27-,28+,29+,30+/m0/s1	HILMIUUGDWWNHO-GRVQADPTSA-N	Physalis orizabae	2012	10.29356/jmcs.v56i2.309	93
203	Withaperuvin J	C28H38O7	486.262	486.605	O=C(C=CC1)[C@@]2(C)C1=CCC3C2CC[C@@]4(C)[C@@]3(O)CC[C@@]4(O)[C@@](C)(O)[C@@H]5OC(C(C)=C(CO)C5)=O	InChI=1S/C28H38O7/c1-16-17(15-29)14-22(35-23(16)31)26(4,32)28(34)13-12-27(33)20-9-8-18-6-5-7-21(30)25(18,3)19(20)10-11-24(27,28)2/h5,7-8,19-20,22,29,32-34H,6,9-15H2,1-4H3/t19?,20?,22-,24+,25+,26+,27-,28+/m1/s1	LGYRZWXQCIGKHT-NRFDVKJRSA-N	Physalis peruviana	2012	10.1016/j.steroids.2011.09.011	64
204	Withaperuvin M	C28H36O7	484.246	484.589	O=C(C=CC1=O)[C@@]2(C)C1=CC[C@]3([H])[C@]2([H])CC[C@@]4(C)[C@@]3(O)CC[C@@]4(O)[C@@](C)(O)[C@@H]5OC(C(C)=C(C)C5)=O	InChI=1S/C28H36O7/c1-15-14-22(35-23(31)16(15)2)26(5,32)28(34)13-12-27(33)18-6-7-19-20(29)8-9-21(30)25(19,4)17(18)10-11-24(27,28)3/h7-9,17-18,22,32-34H,6,10-14H2,1-5H3/t17-,18+,22+,24-,25+,26-,27+,28-/m0/s1	DFTHFSABLKYBDV-FGLUZVFASA-N	Physalis peruviana	2012	10.1016/j.steroids.2011.09.011	64
205	Wadpressine	C40H60O16	796.388	796.904	O=C(C[C@H](O[C@@H]([C@@H]1O)O[C@H](CO)[C@@H](O[C@@H]([C@@H]2O)O[C@@H](C)[C@H](O)[C@H]2O)[C@@H]1O)C3)[C@@]4(C)C3=CC[C@]5([H])[C@]4([H])CC[C@@]6(C)[C@]5(CC[C@@]6(O)[C@@]([C@]7([H])OC(C(C)=C(C)C7)=O)(C)O)O	InChI=1S/C40H60O16/c1-17-13-26(55-33(48)18(17)2)38(6,49)40(51)12-11-39(50)23-8-7-20-14-21(15-25(42)37(20,5)22(23)9-10-36(39,40)4)53-35-31(47)29(45)32(24(16-41)54-35)56-34-30(46)28(44)27(43)19(3)52-34/h7,19,21-24,26-32,34-35,41,43-47,49-51H,8-16H2,1-6H3/t19-,21+,22-,23+,24+,26+,27-,28+,29+,30+,31+,32+,34-,35+,36-,37-,38-,39+,40-/m0/s1	UQRGKUPUKAZSRB-LROAWTKHSA-N	Withania adpressa	2018	10.1080/13880209.2018.1499781	94
206	15α-Acetoxyphysachenolide D	C32H42O10	586.278	586.678	O=C(C=CC1)[C@@]2(C)C1=CC[C@]3([H])[C@]2([H])CC[C@@]4(COC(C)=O)[C@@]3(O)[C@@H](OC(C)=O)C[C@]4([C@@]([C@]5([H])OC(C(C)=C(C)C5)=O)(C)O)O	InChI=1S/C32H42O10/c1-17-14-25(42-27(36)18(17)2)29(6,37)31(38)15-26(41-20(4)34)32(39)23-11-10-21-8-7-9-24(35)28(21,5)22(23)12-13-30(31,32)16-40-19(3)33/h7,9-10,22-23,25-26,37-39H,8,11-16H2,1-6H3/t22-,23+,25+,26?,28-,29-,30-,31+,32-/m0/s1	AYQSOQAXHARFPU-NHQYQNJPSA-N	Physalis coztomatl	2015	10.1016/j.phytochem.2014.10.012	71
207	28-O-β-D-Glucopyranosylphysachenolide D	C36H50O14	706.32	706.782	O=C(C=CC1)[C@@]2(C)C1=CC[C@]3([H])[C@]2([H])CC[C@@]4(COC(C)=O)[C@@]3(O)CC[C@]4([C@@]([C@]5([H])OC(C(C)=C(CO[C@@]([H])([C@](O)6[H])O[C@]([H])(CO)[C@@]([H])(O)[C@@]6(O)[H])C5)=O)(C)O)O	InChI=1S/C36H50O14/c1-18-20(16-47-31-29(42)28(41)27(40)24(15-37)49-31)14-26(50-30(18)43)33(4,44)36(46)13-12-35(45)23-9-8-21-6-5-7-25(39)32(21,3)22(23)10-11-34(35,36)17-48-19(2)38/h5,7-8,22-24,26-29,31,37,40-42,44-46H,6,9-17H2,1-4H3/t22-,23+,24+,26+,27+,28-,29+,31+,32-,33-,34+,35+,36+/m0/s1	MAXZATRQBAZMMX-LDNVXCRGSA-N	Physalis coztomatl	2015	10.1016/j.phytochem.2014.10.012	71
208	2,3-Dihydro-3β-O-sulfonylphysachenolide D	C30H42O12S	626.24	626.714	O=C(C[C@H](OS(O)(=O)=O)C1)[C@@]2(C)C1=CC[C@]3([H])[C@]2([H])CC[C@@]4(COC(C)=O)[C@@]3(O)CC[C@]4([C@@]([C@]5([H])OC(C(C)=C(C)C5)=O)(C)O)O	InChI=1S/C30H42O12S/c1-16-12-24(41-25(33)17(16)2)27(5,34)30(36)11-10-29(35)22-7-6-19-13-20(42-43(37,38)39)14-23(32)26(19,4)21(22)8-9-28(29,30)15-40-18(3)31/h6,20-22,24,34-36H,7-15H2,1-5H3,(H,37,38,39)/t20-,21+,22-,24-,26+,27+,28-,29-,30-/m1/s1	XREKQGGCWMMSMC-IJXJJIRRSA-N	Physalis coztomatl	2015	10.1016/j.phytochem.2014.10.012	71
209	15α-Acetoxy-2,3-dihydrophysachenolide D 3β-O-sulfate	C32H44O14S	684.245	684.75	O=C(C[C@H](OS(=O)(O)=O)C1)[C@@]2(C)C1=CC[C@]3([H])[C@]2([H])CC[C@@]4(COC(C)=O)[C@]3([C@@H](OC(C)=O)C[C@@]4(O)[C@@]([C@]5([H])OC(C(C)=C(C)C5)=O)(C)O)O	InChI=1S/C32H44O14S/c1-16-11-25(45-27(36)17(16)2)29(6,37)31(38)14-26(44-19(4)34)32(39)23-8-7-20-12-21(46-47(40,41)42)13-24(35)28(20,5)22(23)9-10-30(31,32)15-43-18(3)33/h7,21-23,25-26,37-39H,8-15H2,1-6H3,(H,40,41,42)/t21-,22+,23-,25-,26?,28+,29+,30+,31-,32+/m1/s1	YMXVSWADOPNEQY-FEAGDMKJSA-N	Physalis crassifolia	2016	10.1021/acs.jnatprod.5b00911	76
210	15α-Hydroxyphysachenolide D	C30H40O9	544.267	544.641	O=C(C=CC1)[C@@]2(C)C1=CC[C@]3([H])[C@]2([H])CC[C@@]4(COC(C)=O)[C@]3([C@@H](O)C[C@@]4(O)[C@@]([C@]5([H])OC(C(C)=C(C)C5)=O)(C)O)O	InChI=1S/C30H40O9/c1-16-13-24(39-25(34)17(16)2)27(5,35)29(36)14-23(33)30(37)21-10-9-19-7-6-8-22(32)26(19,4)20(21)11-12-28(29,30)15-38-18(3)31/h6,8-9,20-21,23-24,33,35-37H,7,10-15H2,1-5H3/t20-,21+,23-,24+,26-,27-,28-,29+,30-/m0/s1	HMNPDIAWXUYDNS-LPAPXIFLSA-N	Physalis crassifolia	2016	10.1021/acs.jnatprod.5b00911	76
211	27-Hydroxyphysachenolide D	C30H40O9	544.267	544.641	O=C(C=CC1)[C@@]2(C)C1=CC[C@]3([H])[C@]2([H])CC[C@@]4(COC(C)=O)[C@]3(CC[C@@]4(O)[C@@]([C@]5([H])OC(C(CO)=C(C)C5)=O)(C)O)O	InChI=1S/C30H40O9/c1-17-14-24(39-25(34)20(17)15-31)27(4,35)30(37)13-12-29(36)22-9-8-19-6-5-7-23(33)26(19,3)21(22)10-11-28(29,30)16-38-18(2)32/h5,7-8,21-22,24,31,35-37H,6,9-16H2,1-4H3/t21-,22+,24+,26-,27-,28+,29+,30+/m0/s1	MLNSIBIIWDOAGC-GRVQADPTSA-N	Physalis crassifolia	2016	10.1021/acs.jnatprod.5b00911	76
212	15α-Acetoxy-27-hydroxyphysachenolide D	C32H42O11	602.273	602.677	O=C(C=CC1)[C@@]2(C)C1=CC[C@]3([H])[C@]2([H])CC[C@@]4(COC(C)=O)[C@]3([C@@H](OC(C)=O)C[C@@]4(O)[C@@]([C@]5([H])OC(C(CO)=C(C)C5)=O)(C)O)O	InChI=1S/C32H42O11/c1-17-13-25(43-27(37)21(17)15-33)29(5,38)31(39)14-26(42-19(3)35)32(40)23-10-9-20-7-6-8-24(36)28(20,4)22(23)11-12-30(31,32)16-41-18(2)34/h6,8-9,22-23,25-26,33,38-40H,7,10-16H2,1-5H3/t22-,23+,25+,26?,28-,29-,30-,31+,32-/m0/s1	DHEXLLNJDVHHIZ-NHQYQNJPSA-N	Physalis crassifolia	2016	10.1021/acs.jnatprod.5b00911	76
213	15α-Acetoxy-27-O-β-glucopyranosylphysachenolide D	C38H52O16	764.326	764.818	O=C(C=CC1)[C@@]2(C)C1=CC[C@]3([H])[C@]2([H])CC[C@@]4(COC(C)=O)[C@]3([C@@H](OC(C)=O)C[C@@]4(O)[C@@]([C@]5([H])OC(C(CO[C@@H]([C@@H]6O)O[C@H](CO)[C@@H](O)[C@@H]6O)=C(C)C5)=O)(C)O)O	InChI=1S/C38H52O16/c1-18-13-27(54-32(46)22(18)16-50-33-31(45)30(44)29(43)25(15-39)53-33)35(5,47)37(48)14-28(52-20(3)41)38(49)24-10-9-21-7-6-8-26(42)34(21,4)23(24)11-12-36(37,38)17-51-19(2)40/h6,8-9,23-25,27-31,33,39,43-45,47-49H,7,10-17H2,1-5H3/t23-,24+,25+,27+,28?,29+,30-,31+,33+,34-,35-,36-,37+,38-/m0/s1	YDHYIMYYVRIJQZ-XVTRUPFHSA-N	Physalis crassifolia	2016	10.1021/acs.jnatprod.5b00911	76
214	15α-Acetoxy-28-O-β-glucopyranosylphysachenolide D	C38H52O16	764.326	764.818	O=C(C=CC1)[C@@]2(C)C1=CC[C@]3([H])[C@]2([H])CC[C@@]4(COC(C)=O)[C@]3([C@@H](OC(C)=O)C[C@@]4(O)[C@@]([C@]5([H])OC(C(C)=C(CO[C@@H]([C@@H]6O)O[C@H](CO)[C@@H](O)[C@@H]6O)C5)=O)(C)O)O	InChI=1S/C38H52O16/c1-18-21(16-50-33-31(45)30(44)29(43)25(15-39)53-33)13-27(54-32(18)46)35(5,47)37(48)14-28(52-20(3)41)38(49)24-10-9-22-7-6-8-26(42)34(22,4)23(24)11-12-36(37,38)17-51-19(2)40/h6,8-9,23-25,27-31,33,39,43-45,47-49H,7,10-17H2,1-5H3/t23-,24+,25+,27+,28?,29+,30-,31+,33+,34-,35-,36-,37+,38-/m0/s1	PZRSZFJJLBAFDE-XVTRUPFHSA-N	Physalis crassifolia	2016	10.1021/acs.jnatprod.5b00911	76
215	(20R,22R)-14α,17,20β,27-Trihydroxy-1-oxowitha-5,24-dienolide-27-(O-β-D-glucopyranoside)	C34H50O13	666.325	666.761	O=C(C[C@H](O[C@@H]([C@@H]1O)O[C@H](CO)[C@@H](O)[C@@H]1O)C2)[C@@]3(C)C2=CC[C@]4([H])[C@]3([H])CC[C@@]5(C)[C@@]4(O)CC[C@@]5(O)[C@@]([C@]6([H])OC(C(CO)=C(C)C6)=O)(C)O	InChI=1S/C34H50O13/c1-16-11-24(47-28(41)19(16)14-35)32(4,42)34(44)10-9-33(43)21-6-5-17-12-18(45-29-27(40)26(39)25(38)22(15-36)46-29)13-23(37)31(17,3)20(21)7-8-30(33,34)2/h5,18,20-22,24-27,29,35-36,38-40,42-44H,6-15H2,1-4H3/t18-,20+,21-,22-,24-,25-,26+,27-,29-,30+,31+,32+,33-,34+/m1/s1	GQJUXUPDEUGXEA-QYJSKYFCSA-N	Withania Coagulans Dunal.	2019	10.1016/j.molstruc.2018.09.078	95
216	17-Epiwithanolide K	C28H38O5	454.272	454.607	O=C(CC=C1)[C@@]2(C)C1=CC[C@]3([H])[C@]2([H])CC[C@@]4(C)[C@@]3(O)CC[C@@]4(O)[C@@H]([C@]5([H])OC(C(C)=C(C)C5)=O)C	InChI=1S/C28H38O5/c1-16-15-22(33-24(30)17(16)2)18(3)27(31)13-14-28(32)21-10-9-19-7-6-8-23(29)26(19,5)20(21)11-12-25(27,28)4/h6-7,9,18,20-22,31-32H,8,10-15H2,1-5H3/t18-,20+,21-,22-,25-,26+,27-,28-/m1/s1	CMVHZFHMRDJBIO-FBZUMMEJSA-N	Physalis peruviana L.	2016	10.1021/acs.jnatprod.5b00648	62	27-deoxycoagulin
217	Withanolide F	C28H38O6	470.267	470.606	O=C(C=CC1)[C@@]2(C)C1=CC[C@]3([H])[C@]2([H])CC[C@@]4(C)[C@@]3(O)CC[C@@]4(O)[C@@]([C@]5([H])OC(C(C)=C(C)C5)=O)(C)O	InChI=1S/C28H38O6/c1-16-15-22(34-23(30)17(16)2)26(5,31)28(33)14-13-27(32)20-10-9-18-7-6-8-21(29)25(18,4)19(20)11-12-24(27,28)3/h6,8-9,19-20,22,31-33H,7,10-15H2,1-5H3/t19-,20+,22+,24-,25-,26-,27+,28-/m0/s1	GQHHHBATDOXAEP-MEZCUPPISA-N	Withania coagulans (Stocks) Dunal	2016	10.1021/acs.jnatprod.5b00648	62	coagulin C
218	27-Hydroxywithanolide F	C28H38O7	486.262	486.605	O=C(C=CC1)[C@@]2(C)C1=CC[C@]3([H])[C@]2([H])CC[C@@]4(C)[C@@]3(O)CC[C@@]4(O)[C@@]([C@]5([H])OC(C(CO)=C(C)C5)=O)(C)O	InChI=1S/C28H38O7/c1-16-14-22(35-23(31)18(16)15-29)26(4,32)28(34)13-12-27(33)20-9-8-17-6-5-7-21(30)25(17,3)19(20)10-11-24(27,28)2/h5,7-8,19-20,22,29,32-34H,6,9-15H2,1-4H3/t19-,20+,22+,24-,25-,26-,27+,28-/m0/s1	NOFNARPLYQSKHE-MEZCUPPISA-N	Withania coagulans (Stocks) Dunal	2016	10.1021/acs.jnatprod.5b00648	62	coagulin G
219	2,3-Dihydro-3β-hydroxywithanolide F	C28H40O7	488.277	488.621	O=C(C[C@H](O)C1)[C@@]2(C)C1=CC[C@]3([H])[C@]2([H])CC[C@@]4(C)[C@@]3(O)CC[C@@]4(O)[C@@]([C@]5([H])OC(C(C)=C(C)C5)=O)(C)O	InChI=1S/C28H40O7/c1-15-12-22(35-23(31)16(15)2)26(5,32)28(34)11-10-27(33)20-7-6-17-13-18(29)14-21(30)25(17,4)19(20)8-9-24(27,28)3/h6,18-20,22,29,32-34H,7-14H2,1-5H3/t18-,19+,20-,22-,24+,25+,26+,27-,28+/m1/s1	BQRGHHNBIPOTTJ-AIYKJBCKSA-N	Withania coagulans (Stocks) Dunal	2016	10.1021/acs.jnatprod.5b00648	62	coagulin R
220	15α-Hydroxycoagulin L	C34H50O13	666.325	666.761	O=C(C[C@H](O[C@@H]([C@@H]1O)O[C@H](CO)[C@@H](O)[C@@H]1O)C2)[C@@]3(C)C2=CC[C@]4([H])[C@]3([H])CC[C@@]5(C)[C@@]4(O)[C@@H](O)C[C@@]5(O)[C@@]([C@]6([H])OC(C(C)=C(C)C6)=O)(C)O	InChI=1S/C34H50O13/c1-15-10-24(47-28(41)16(15)2)32(5,42)33(43)13-23(37)34(44)20-7-6-17-11-18(45-29-27(40)26(39)25(38)21(14-35)46-29)12-22(36)31(17,4)19(20)8-9-30(33,34)3/h6,18-21,23-27,29,35,37-40,42-44H,7-14H2,1-5H3/t18-,19+,20-,21-,23+,24-,25-,26+,27-,29-,30-,31+,32+,33+,34+/m1/s1	XCWWFQBJJKTNHH-HNTGIVAOSA-N	Withania coagulans (Stocks) Dunal	2016	10.1021/acs.jnatprod.5b00648	62	coagulin N
221	Coagulin L	C34H50O12	650.33	650.762	O=C(C[C@H](O[C@@H]([C@@H]1O)O[C@H](CO)[C@@H](O)[C@@H]1O)C2)[C@@]3(C)C2=CC[C@]4([H])[C@]3([H])CC[C@@]5(C)[C@@]4(O)CC[C@@]5(O)[C@@]([C@]6([H])OC(C(C)=C(C)C6)=O)(C)O	InChI=1S/C34H50O12/c1-16-12-24(46-28(40)17(16)2)32(5,41)34(43)11-10-33(42)21-7-6-18-13-19(44-29-27(39)26(38)25(37)22(15-35)45-29)14-23(36)31(18,4)20(21)8-9-30(33,34)3/h6,19-22,24-27,29,35,37-39,41-43H,7-15H2,1-5H3/t19-,20+,21-,22-,24-,25-,26+,27-,29-,30+,31+,32+,33-,34+/m1/s1	SYYXVJIFABSJBU-MJJWKRKWSA-N	Physalis peruviana L.	2016	10.1021/acs.jnatprod.5b00648	62	2,3-dihydro-3β-O-β-D-glucopyranosylcoagulin C
222	14α,15α,17β,20-Tetrahydroxy-1-oxowitha-2,5,24-trienolide	C28H38O7	486.262	486.605	C[C@]12C(CC=CC2=O)=CC[C@]3([H])[C@]1([H])CC[C@@]4(C)[C@@]3(O)[C@@H](O)C[C@@]4(O)[C@]([C@]5([H])OC(C(C)=C(C)C5)=O)(O)C	InChI=1S/C28H38O7/c1-15-13-22(35-23(31)16(15)2)26(5,32)27(33)14-21(30)28(34)19-10-9-17-7-6-8-20(29)25(17,4)18(19)11-12-24(27,28)3/h6,8-9,18-19,21-22,30,32-34H,7,10-14H2,1-5H3/t18-,19+,21-,22+,24+,25-,26-,27-,28-/m0/s1	XAEUKOBJPRGERY-VLXOZLMASA-N	Withania coagulans	2012	10.1021/acs.jnatprod.5b00648 and 10.1248/cpb.c12-00264	62,96	withacoagulide A
223	Withacoagulin C	C28H38O7	486.262	486.605	C[C@]12C(C=CCC2=O)=CC[C@]3([H])[C@]1([H])CC[C@@]4(C)[C@@]3(O)[C@@H](O)C[C@@]4(O)[C@]([C@]5([H])OC(C(C)=C(C)C5)=O)(O)C	InChI=1S/C28H38O7/c1-15-13-22(35-23(31)16(15)2)26(5,32)27(33)14-21(30)28(34)19-10-9-17-7-6-8-20(29)25(17,4)18(19)11-12-24(27,28)3/h6-7,9,18-19,21-22,30,32-34H,8,10-14H2,1-5H3/t18-,19+,21-,22+,24+,25-,26-,27-,28-/m0/s1	QKOOJURCARFMON-VLXOZLMASA-N	Withania coagulans	2009, 2012	10.1021/acs.jnatprod.5b00648, 10.1248/cpb.c12-00264, and 10.1002/cbdv.200800211	62,96,97	withacoagulide B
224	14α,15α-Epoxy-17β,20-dihydroxy-1-oxowitha-3,5,24-trienolide	C28H36O6	468.251	468.59	C[C@]12C(C=CCC2=O)=CC[C@]3([H])[C@]1([H])CC[C@@]4(C)[C@@]3(O5)[C@@H]5C[C@@]4(O)[C@]([C@]6([H])OC(C(C)=C(C)C6)=O)(O)C	InChI=1S/C28H36O6/c1-15-13-21(33-23(30)16(15)2)26(5,31)27(32)14-22-28(34-22)19-10-9-17-7-6-8-20(29)25(17,4)18(19)11-12-24(27,28)3/h6-7,9,18-19,21-22,31-32H,8,10-14H2,1-5H3/t18-,19+,21+,22-,24+,25-,26-,27-,28-/m0/s1	PGIDBGZTUHBNQF-ONPFVJRJSA-N	Withania coagulans (Stocks) Dunal	2016	10.1021/acs.jnatprod.5b00648	62	14β,15β-epoxy-17β,20-dihydroxy-1-oxowitha-3,5,24-trienolide
225	Physaminilide H	C30H38O7	510.262	510.627	O=C(C=C[C@@H]1O)[C@@]2(C)C1=CC[C@]3([H])[C@]2([H])CC[C@@]4(C)[C@]3(O)[C@@H](OC(C)=O)C=C4[C@@H]([C@]5([H])OC(C(C)=C(C)C5)=O)C	InChI=1S/C30H38O7/c1-15-13-24(37-27(34)16(15)2)17(3)22-14-26(36-18(4)31)30(35)20-7-8-21-23(32)9-10-25(33)29(21,6)19(20)11-12-28(22,30)5/h8-10,14,17,19-20,23-24,26,32,35H,7,11-13H2,1-6H3/t17-,19-,20+,23-,24+,26?,28+,29+,30+/m0/s1	INPZYNIWKBZTQB-SKQFQTIMSA-N	Physalis minima	2020	10.1016/j.fitote.2020.104728	55
226	(4S,20S,22R)-4,27-Dihydroxy-1-oxo-witha-2,5,16,24-tetraenolide	C28H36O5	452.256	452.591	O=C(C=C[C@@H]1O)[C@@]2(C)C1=CC[C@]3([H])[C@]2([H])CC[C@@]4(C)[C@@]3([H])CC=C4[C@@H]([C@]5([H])OC(C(CO)=C(C)C5)=O)C	InChI=1S/C28H36O5/c1-15-13-24(33-26(32)18(15)14-29)16(2)19-7-8-20-17-5-6-22-23(30)9-10-25(31)28(22,4)21(17)11-12-27(19,20)3/h6-7,9-10,16-17,20-21,23-24,29-30H,5,8,11-14H2,1-4H3/t16-,17-,20-,21-,23-,24+,27+,28+/m0/s1	HDLZLRVXLIHVJS-HBLUZFHOSA-N	Withania aristata	2010	10.1016/j.steroids.2010.06.001	74
227	(4S,20S,22R)-4-Hydroxy-1-oxo-witha-2,5,16,24-tetraenolide	C28H36O4	436.261	436.592	O=C(C=C[C@@H]1O)[C@@]2(C)C1=CC[C@]3([H])[C@]2([H])CC[C@@]4(C)[C@@]3([H])CC=C4[C@@H]([C@]5([H])OC(C(C)=C(C)C5)=O)C	InChI=1S/C28H36O4/c1-15-14-24(32-26(31)16(15)2)17(3)19-8-9-20-18-6-7-22-23(29)10-11-25(30)28(22,5)21(18)12-13-27(19,20)4/h7-8,10-11,17-18,20-21,23-24,29H,6,9,12-14H2,1-5H3/t17-,18-,20-,21-,23-,24+,27+,28+/m0/s1	JDUIGAYKAPJCHV-MRHWPVOXSA-N	Withania aristata	2010	10.1016/j.steroids.2010.06.001	74
228	(20S,22R)-27-Hydroxy-1,4-dioxo-witha-2,5,16,24-tetraenolide	C28H34O5	450.241	450.575	O=C(C=CC1=O)[C@@]2(C)C1=CC[C@]3([H])[C@]2([H])CC[C@@]4(C)[C@@]3([H])CC=C4[C@@H]([C@]5([H])OC(C(CO)=C(C)C5)=O)C	InChI=1S/C28H34O5/c1-15-13-24(33-26(32)18(15)14-29)16(2)19-7-8-20-17-5-6-22-23(30)9-10-25(31)28(22,4)21(17)11-12-27(19,20)3/h6-7,9-10,16-17,20-21,24,29H,5,8,11-14H2,1-4H3/t16-,17-,20-,21-,24+,27+,28+/m0/s1	HGLJIWIPJXPELB-FSICCMRMSA-N	Withania aristata	2010	10.1016/j.steroids.2010.06.001	74
229	(4S,22R)-4,16β,27-Trihydroxy-1-oxo-witha-2,5,17(20),24-tetraenolide	C28H36O6	468.251	468.59	O=C(C=C[C@@H]1O)[C@@]2(C)C1=CC[C@]3([H])[C@]2([H])CC[C@@]4(C)[C@@]3([H])C[C@H](O)/C4=C([C@]5([H])OC(C(CO)=C(C)C5)=O)/C	InChI=1S/C28H36O6/c1-14-11-23(34-26(33)17(14)13-29)15(2)25-22(31)12-20-16-5-6-19-21(30)7-8-24(32)28(19,4)18(16)9-10-27(20,25)3/h6-8,16,18,20-23,29-31H,5,9-13H2,1-4H3/b25-15+/t16-,18+,20+,21+,22+,23-,27+,28-/m1/s1	GPNLSEVBFOXDFF-GUBMYHPBSA-N	Withania aristata	2010	10.1016/j.steroids.2010.06.001	74
230	(22R)-16β,27-Dihydroxy-1-oxo-witha-2,5,17(20),24-tetraenolide	C28H36O5	452.256	452.591	O=C(C=CC1)[C@@]2(C)C1=CC[C@]3([H])[C@]2([H])CC[C@@]4(C)[C@@]3([H])C[C@H](O)/C4=C([C@]5([H])OC(C(CO)=C(C)C5)=O)/C	InChI=1S/C28H36O5/c1-15-12-23(33-26(32)19(15)14-29)16(2)25-22(30)13-21-18-9-8-17-6-5-7-24(31)28(17,4)20(18)10-11-27(21,25)3/h5,7-8,18,20-23,29-30H,6,9-14H2,1-4H3/b25-16+/t18-,20+,21+,22+,23-,27+,28+/m1/s1	XYLFHJKJMUUGTA-VURQOZOWSA-N	Withania aristata	2010	10.1016/j.steroids.2010.06.001	74
231	(22R)-16β,27-Dihydroxy-1,4-dioxo-witha-2,5,17(20),24-tetraenolide	C28H34O6	466.236	466.574	O=C(C=CC1=O)[C@@]2(C)C1=CC[C@]3([H])[C@]2([H])CC[C@@]4(C)[C@@]3([H])C[C@H](O)/C4=C([C@]5([H])OC(C(CO)=C(C)C5)=O)/C	InChI=1S/C28H34O6/c1-14-11-23(34-26(33)17(14)13-29)15(2)25-22(31)12-20-16-5-6-19-21(30)7-8-24(32)28(19,4)18(16)9-10-27(20,25)3/h6-8,16,18,20,22-23,29,31H,5,9-13H2,1-4H3/b25-15+/t16-,18+,20+,22+,23-,27+,28-/m1/s1	WLGSOSFRZPMRAJ-DMFCAOOSSA-N	Withania aristata	2010	10.1016/j.steroids.2010.06.001	74
232	Withanolide B	C28H38O5	454.272	454.607	O=C1[C@@]2(C)[C@]([C@@H](O3)[C@@H]3[C@]4([H])[C@]2([H])CC[C@@]5(C)[C@@]4([H])CC[C@]5([H])[C@H](C)[C@]6([H])OC(C(C)=C(C)C6)=O)(O)CC=C1	InChI=1S/C28H38O5/c1-14-13-20(32-25(30)15(14)2)16(3)17-8-9-18-22-19(10-12-26(17,18)4)27(5)21(29)7-6-11-28(27,31)24-23(22)33-24/h6-7,16-20,22-24,31H,8-13H2,1-5H3/t16-,17+,18-,19-,20+,22-,23-,24-,26+,27-,28-/m0/s1	ZTEVDTFJUUJBLP-MBMSZCMESA-N	Lycium chinense	1975, 2014	10.1002/ardp.19753080814 and 10.1007/s10870-014-0499-1	98, 34
233	14α-Hydroxywithanolide A	C28H38O7	486.262	486.605	O=C1[C@@]2(C)[C@]([C@@H](O3)[C@@H]3[C@]4([H])[C@]2([H])CC[C@@]5(C)[C@]4(CC[C@]5([H])[C@@]([C@]6([H])OC(C(C)=C(C)C6)=O)(C)O)O)(O)CC=C1	InChI=1S/C28H38O7/c1-14-13-19(34-23(30)15(14)2)26(5,31)17-9-12-27(32)20-16(8-11-24(17,27)3)25(4)18(29)7-6-10-28(25,33)22-21(20)35-22/h6-7,16-17,19-22,31-33H,8-13H2,1-5H3/t16-,17-,19+,20-,21-,22-,24+,25-,26+,27+,28-/m0/s1	BLTRHMXYDSWHKQ-RTRPFIRXSA-N	Physalis crassifolia	2016	10.1021/acs.jnatprod.5b00911	76
234	Withasilolide D	C28H38O7	486.262	486.605	O=C1[C@@]2(C)[C@]([C@@H](O3)[C@@H]3[C@]4([H])[C@]2([H])CC[C@@]5(C)[C@@]4([H])CC[C@]5([H])[C@@]([C@]6([H])OC(C(C)=C(C)[C@@H]6O)=O)(C)O)(O)CC=C1	InChI=1S/C28H38O7/c1-13-14(2)24(31)35-22(20(13)30)27(5,32)17-9-8-15-19-16(10-12-25(15,17)3)26(4)18(29)7-6-11-28(26,33)23-21(19)34-23/h6-7,15-17,19-23,30,32-33H,8-12H2,1-5H3/t15-,16-,17-,19-,20-,21-,22+,23-,25-,26-,27+,28-/m0/s1	SGXJKVRMEZABFC-JWGKNYEHSA-N	Withania somnifera	2019	10.1021/acs.jnatprod.8b00665	99
235	Baimantuoluoline O	C30H42O7	514.293	514.659	O=C1[C@@]2(C)[C@]([C@@H](O3)[C@@H]3[C@]4([H])[C@]2([H])C[C@@H](O)[C@@]5(C)[C@@]4([H])CC[C@]5([H])[C@H](C)[C@]6([H])OC(C(COCC)=C(C)C6)=O)(O)CC=C1	InChI=1S/C30H42O7/c1-6-35-14-17-15(2)12-21(36-27(17)33)16(3)18-9-10-19-24-20(13-23(32)28(18,19)4)29(5)22(31)8-7-11-30(29,34)26-25(24)37-26/h7-8,16,18-21,23-26,32,34H,6,9-14H2,1-5H3/t16-,18+,19-,20-,21+,23+,24-,25-,26-,28+,29-,30-/m0/s1	KUVLEOHQQUCMDC-JWYOUZOBSA-N	Datura metel L.	2020	10.1016/j.fitote.2019.104468	89
236	Plantagiolide I	C38H53ClO16	800.302	801.276	O[C@@H]1[C@@]2(C)[C@]([C@@H](O3)[C@@H]3[C@]4([H])[C@]2([H])C[C@H](OC(C)=O)[C@@]5(C)[C@]4(CC([C@]5([H])[C@@H]([C@]6([H])OC(C(CO[C@@H]([C@@H]7O)O[C@H](CO)[C@@H](O)[C@@H]7O)=C(C)C6)=O)C)=O)[H])(O)C[C@H](Cl)[C@@H]1OC(C)=O	InChI=1S/C38H53ClO16/c1-13-7-22(53-34(48)17(13)12-50-35-29(46)28(45)27(44)23(11-40)54-35)14(2)26-21(43)8-18-25-19(9-24(36(18,26)5)51-15(3)41)37(6)32(47)30(52-16(4)42)20(39)10-38(37,49)33-31(25)55-33/h14,18-20,22-33,35,40,44-47,49H,7-12H2,1-6H3/t14-,18+,19+,20+,22-,23-,24+,25+,26+,27-,28+,29-,30+,31+,32+,33+,35-,36-,37+,38+/m1/s1	TUZXTKLBUMCZBH-ZSSHUTGMSA-N	Tacca plantaginea	2012	10.1248/cpb.c12-00550	100
237	Plantagiolide J	C36H52O15	724.331	724.797	O[C@@H]1[C@@]2(C)[C@]([C@@H](O3)[C@@H]3[C@]4([H])[C@]2([H])C[C@H](OC(C)=O)[C@@]5(C)[C@]4(C[C@H](O)[C@]5([H])[C@@H]([C@]6([H])OC(C(CO[C@@H]([C@@H]7O)O[C@H](CO)[C@@H](O)[C@@H]7O)=C(C)C6)=O)C)[H])(O)C[C@H]8[C@@H]1O8	InChI=1S/C36H52O15/c1-12-6-19(49-32(44)15(12)11-46-33-27(42)26(41)25(40)21(10-37)50-33)13(2)24-18(39)7-16-23-17(8-22(34(16,24)4)47-14(3)38)35(5)30(43)28-20(48-28)9-36(35,45)31-29(23)51-31/h13,16-31,33,37,39-43,45H,6-11H2,1-5H3/t13-,16+,17+,18+,19-,20+,21-,22+,23+,24+,25-,26+,27-,28+,29+,30+,31+,33-,34-,35+,36+/m1/s1	FOWQTOAFOCRXOF-FIZSPZDOSA-N	Tacca plantaginea	2012	10.1248/cpb.c12-00550	100
238	Plantagiolide F	C30H42O10	562.278	562.656	O[C@@H]1[C@@]2(C)[C@]([C@@H](O3)[C@@H]3[C@]4([H])[C@]2([H])C[C@H](OC(C)=O)[C@@]5(C)[C@]4(C[C@H](O)[C@@]5([C@@H]([C@]6([H])OC(C(CO)=C(C)C6)=O)C)[H])[H])(O)C[C@H]7[C@@H]1O7	InChI=1S/C30H42O10/c1-11-6-18(39-27(35)14(11)10-31)12(2)22-17(33)7-15-21-16(8-20(28(15,22)4)37-13(3)32)29(5)25(34)23-19(38-23)9-30(29,36)26-24(21)40-26/h12,15-26,31,33-34,36H,6-10H2,1-5H3/t12-,15+,16+,17+,18-,19+,20?,21+,22+,23+,24+,25+,26+,28-,29+,30+/m1/s1	TXOVEIJTMFSOMI-YVQLOYHHSA-N	Tacca plantaginea	2011	10.1080/14786411003774304	101
239	Plantagiolide K	C30H44O10	564.293	564.672	C[C@@]12[C@]([C@@H](O3)[C@@H]3[C@]4([H])[C@]2([H])C[C@H](O)[C@@]5(C)[C@]4(C[C@H](O)[C@@]5([C@@H]([C@]6([H])OC([C@H](C)[C@](C)(O)C6)=O)C)[H])[H])(O)C[C@H]7[C@H](O7)[C@@H]1OC(C)=O	InChI=1S/C30H44O10/c1-11(17-9-27(4,35)12(2)26(34)39-17)21-16(32)7-14-20-15(8-19(33)28(14,21)5)29(6)24(37-13(3)31)22-18(38-22)10-30(29,36)25-23(20)40-25/h11-12,14-25,32-33,35-36H,7-10H2,1-6H3/t11-,12+,14+,15+,16+,17-,18+,19+,20+,21+,22+,23+,24?,25+,27-,28-,29+,30+/m1/s1	HFTBMBRINUJRMN-UGYIYQMZSA-N	Tacca plantaginea	2015	10.1016/j.fitote.2015.06.015	92
240	Plantagiolide L	C28H42O9	522.283	522.635	O[C@@H]1[C@@]2(C)[C@]([C@@H](O3)[C@@H]3[C@]4([H])[C@]2([H])C[C@H](O)[C@@]5(C)[C@]4(C[C@H](O)[C@@]5([C@@H]([C@]6([H])OC([C@H](C)[C@](C)(O)C6)=O)C)[H])[H])(O)C[C@H]7[C@@H]1O7	InChI=1S/C28H42O9/c1-10(15-8-25(3,33)11(2)24(32)36-15)19-14(29)6-12-18-13(7-17(30)26(12,19)4)27(5)22(31)20-16(35-20)9-28(27,34)23-21(18)37-23/h10-23,29-31,33-34H,6-9H2,1-5H3/t10-,11+,12+,13+,14+,15-,16+,17+,18+,19+,20+,21+,22+,23+,25-,26-,27+,28+/m1/s1	GAIOKXDOLKAISK-ZWZASRBFSA-N	Tacca plantaginea	2015	10.1016/j.fitote.2015.06.015	92
241	Dioscolide glucoside	C34H50O13	666.325	666.761	O=C1[C@@]2(C)[C@]([C@@H](O3)[C@@H]3C4C2CC[C@@]5(C)C4C[C@@H](O)C5[C@@H]([C@]6([H])OC([C@@](C)(O[C@@]([H])([C@](O)7[H])O[C@]([H])(CO)[C@@]([H])(O)[C@@]7(O)[H])[C@H](C)C6)=O)C)(O)C[C@H]8[C@@H]1O8	InChI=1S/C34H50O13/c1-12-8-17(45-30(41)33(12,5)47-29-24(39)23(38)22(37)19(11-35)44-29)13(2)21-16(36)9-15-20-14(6-7-31(15,21)3)32(4)27(40)25-18(43-25)10-34(32,42)28-26(20)46-28/h12-26,28-29,35-39,42H,6-11H2,1-5H3/t12-,13-,14?,15?,16-,17-,18+,19-,20?,21?,22-,23+,24-,25+,26+,28+,29+,31+,32+,33+,34+/m1/s1	DMBASURMWCYLDR-URWCYJGJSA-N	Dioscorea panthaica	2013	10.6023/cjoc201301083	102
242	Philadelphicalactone D	C28H40O7	488.277	488.621	O=C1[C@@]2(C)[C@]([C@@H](O3)[C@@H]3[C@]4([H])[C@]2([H])CC[C@@]5(C)[C@]4(CC[C@]5([H])[C@@]([C@]6([H])OC([C@H](C)[C@](C)(O)C6)=O)(C)O)[H])(O)CC=C1	InChI=1S/C28H40O7/c1-14-23(30)34-19(13-25(14,3)31)27(5,32)17-9-8-15-20-16(10-12-24(15,17)2)26(4)18(29)7-6-11-28(26,33)22-21(20)35-22/h6-7,14-17,19-22,31-33H,8-13H2,1-5H3/t14-,15-,16-,17-,19+,20-,21-,22-,24-,25+,26-,27+,28-/m0/s1	TZGRZUNWHGVRMU-RBAHIWJHSA-N	Physalis philadelphica Lam.	2011	10.1016/j.steroids.2011.03.018	48
243	Chantriolide D	C28H40O7	488.277	488.621	O=C1[C@@]2(C)[C@]([C@@H](O3)[C@@H]3[C@]4([H])[C@]2([H])C[C@H](O)[C@@]5(C)[C@]4(CC[C@]5([H])[C@@H]([C@]6([H])OC([C@H](C)[C@@](C)(O)C6)=O)C)[H])(O)CC=C1	InChI=1S/C28H40O7/c1-13(18-12-25(3,32)14(2)24(31)34-18)15-8-9-16-21-17(11-20(30)26(15,16)4)27(5)19(29)7-6-10-28(27,33)23-22(21)35-23/h6-7,13-18,20-23,30,32-33H,8-12H2,1-5H3/t13-,14-,15+,16-,17-,18+,20-,21-,22-,23-,25-,26+,27-,28-/m0/s1	SQUBUFVDIWDOOH-ZPLADHDCSA-N	Tacca chantrieri	2015	10.1055/s-0034-1396203	150
244	Dioscorolide A	C28H40O6	472.283	472.622	O=C1[C@@]2(C)[C@]([C@@H](O3)[C@@H]3[C@]4([H])[C@]2([H])CC[C@@]5(C)[C@]4(CC[C@]5([H])[C@@H]([C@]6([H])OC([C@H](C)[C@@](C)(O)C6)=O)C)[H])(O)CC=C1	InChI=1S/C28H40O6/c1-14(19-13-26(4,31)15(2)24(30)33-19)16-8-9-17-21-18(10-12-25(16,17)3)27(5)20(29)7-6-11-28(27,32)23-22(21)34-23/h6-7,14-19,21-23,31-32H,8-13H2,1-5H3/t14-,15-,16+,17-,18-,19+,21-,22-,23-,25+,26-,27-,28-/m0/s1	UUPUQTZXUATCKO-WWOYFYTGSA-N	Dioscorea japonica	2011	10.1021/jf2006535	103
245	Dioscorolide B	C30H44O7S	548.281	548.735	O=C1[C@@]2(C)[C@]([C@@H](O3)[C@@H]3[C@]4([H])[C@]2([H])CC[C@@]5(C)[C@]4(CC[C@]5([H])[C@@H]([C@]6([H])OC([C@H](C)[C@@](C)(O)C6)=O)C)[H])(O)C[C@@H](SC(C)=O)C1	InChI=1S/C30H44O7S/c1-14(21-13-28(5,34)15(2)26(33)36-21)18-7-8-19-23-20(9-10-27(18,19)4)29(6)22(32)11-17(38-16(3)31)12-30(29,35)25-24(23)37-25/h14-15,17-21,23-25,34-35H,7-13H2,1-6H3/t14-,15-,17-,18+,19-,20-,21+,23-,24-,25-,27+,28-,29-,30-/m0/s1	MXHNLVKWJYKLBK-TWLZKMBGSA-N	Dioscorea japonica	2011	10.1021/jf2006535	103
246	Mandragorolide B	C28H40O7	488.277	488.621	O=C1[C@@]2(C)[C@]([C@@H](O3)[C@@H]3[C@]4([H])[C@]2([H])CC[C@@]5(C)[C@]4(CC[C@]5([H])[C@@H]([C@]6([H])OC([C@](C)(O)[C@](C)(O)C6)=O)C)[H])(O)CC=C1	InChI=1S/C28H40O7/c1-14(18-13-25(3,31)27(5,32)23(30)34-18)15-8-9-16-20-17(10-12-24(15,16)2)26(4)19(29)7-6-11-28(26,33)22-21(20)35-22/h6-7,14-18,20-22,31-33H,8-13H2,1-5H3/t14-,15+,16-,17-,18+,20-,21-,22-,24+,25+,26-,27-,28-/m0/s1	LCSLLLZIEJBJQH-VTNPAEMJSA-N	Mandragora officinarum	2010	10.1016/j.fitote.2010.05.013	104
247	Withasilolide C	C28H40O6	472.283	472.622	O=C1[C@@]2(C)[C@]([C@@H](O3)[C@@H]3[C@]4([H])[C@]2([H])CC[C@@]5(C)[C@@]4([H])CC[C@]5(O)[C@@H]([C@]6([H])OC([C@H](C)[C@@H](C)C6)=O)C)(O)CC=C1	InChI=1S/C28H40O6/c1-14-13-19(33-24(30)15(14)2)16(3)27(31)12-9-17-21-18(8-11-25(17,27)4)26(5)20(29)7-6-10-28(26,32)23-22(21)34-23/h6-7,14-19,21-23,31-32H,8-13H2,1-5H3/t14-,15+,16+,17-,18-,19+,21-,22-,23-,25-,26-,27-,28-/m0/s1	UAGLAOGRDSLWSA-MVHXHFLPSA-N	Withania somnifera	2019	10.1021/acs.jnatprod.8b00665	99
248	16β-Hydroxyixocarpanolide	C28H40O7	488.277	488.621	O=C1[C@@]2(C)[C@]([C@@H](O3)[C@@H]3[C@]4([H])[C@]2([H])CC[C@@]5(C)[C@@]4([H])C[C@H](O)[C@]5([H])[C@@]([C@]6([H])OC([C@H](C)[C@@H](C)C6)=O)(C)O)(O)CC=C1	InChI=1S/C28H40O7/c1-13-11-19(34-24(31)14(13)2)27(5,32)22-17(29)12-16-20-15(8-10-25(16,22)3)26(4)18(30)7-6-9-28(26,33)23-21(20)35-23/h6-7,13-17,19-23,29,32-33H,8-12H2,1-5H3/t13-,14+,15-,16-,17-,19+,20+,21-,22-,23-,25-,26-,27-,28-/m0/s1	YBEXAUJVRXFPRO-UMVVJRRYSA-N	Physalis philadelphica	2018	10.1016/j.phytochem.2018.04.018	44
249	24,25-Dihydroexodeconolide C	C28H40O7	488.277	488.621	O=C1[C@@]2(C)[C@]([C@@H](O3)[C@@H]3[C@]4([H])[C@]2([H])CC[C@@]5(C)[C@@]4([H])C[C@@H](O)[C@]5(O)[C@@H]([C@]6([H])OC([C@H](C)[C@@H](C)C6)=O)C)(O)CC=C1	InChI=1S/C28H40O7/c1-13-11-18(34-24(31)14(13)2)15(3)28(33)20(30)12-17-21-16(8-10-25(17,28)4)26(5)19(29)7-6-9-27(26,32)23-22(21)35-23/h6-7,13-18,20-23,30,32-33H,8-12H2,1-5H3/t13-,14+,15+,16-,17-,18+,20+,21+,22-,23-,25-,26-,27-,28+/m0/s1	VDHZPEITBDUTRS-JQOPXPPUSA-N	Physalis philadelphica	2018	10.1016/j.phytochem.2018.04.018	44
250	Nicanlode G	C28H40O7	488.277	488.621	O=C1[C@@]2(C)[C@]([C@@H](O3)[C@@H]3[C@]4([H])[C@]2([H])C[C@@H](O)[C@@]5(C)[C@@]4([H])CC[C@]5([H])[C@@H]([C@]6([H])O[C@@H](O)[C@@](C)(O7)[C@]7(C)C6)C)(O)CC=C1	InChI=1S/C28H40O7/c1-13(17-12-24(2)27(5,35-24)23(31)33-17)14-8-9-15-20-16(11-19(30)25(14,15)3)26(4)18(29)7-6-10-28(26,32)22-21(20)34-22/h6-7,13-17,19-23,30-32H,8-12H2,1-5H3/t13-,14+,15-,16-,17+,19+,20-,21-,22-,23+,24-,25+,26-,27+,28-/m0/s1	FAHYSWUEEGTJQH-YTACYGNZSA-N	Nicandra physalodes	2017	10.1016/j.phytochem.2017.02.009	105
251	Nicanlode I	C29H42O7	502.293	502.648	O=C1[C@@]2(C)[C@]([C@@H](O3)[C@@H]3[C@]4([H])[C@]2([H])C[C@H](O)[C@@]5(C)[C@@]4([H])CC[C@]5([H])[C@@H]([C@]6([H])O[C@@H](OC)[C@@](C)(O7)[C@]7(C)C6)C)(O)CC=C1	InChI=1S/C29H42O7/c1-14(18-13-25(2)28(5,36-25)24(33-6)34-18)15-9-10-16-21-17(12-20(31)26(15,16)3)27(4)19(30)8-7-11-29(27,32)23-22(21)35-23/h7-8,14-18,20-24,31-32H,9-13H2,1-6H3/t14-,15+,16-,17-,18+,20-,21-,22-,23-,24?,25-,26+,27-,28+,29-/m0/s1	OGRCAXXUDZZJCR-BHPLVXMPSA-N	Nicandra physalodes	2017	10.1016/j.phytochem.2017.02.009	105
252	Nicanlode J	C29H40O7	500.277	500.632	O=C1[C@@]2(C)[C@]([C@@H](O3)[C@@H]3[C@]4([H])[C@]2([H])CC[C@@]5(C)[C@@]4([H])[C@H](OC)C=C5[C@@H]([C@]6([H])O[C@@H](O)[C@@](C)(O7)[C@]7(C)C6)C)(O)CC=C1	InChI=1S/C29H40O7/c1-14(18-13-26(3)28(5,36-26)24(31)34-18)16-12-17(33-6)21-20-15(9-11-25(16,21)2)27(4)19(30)8-7-10-29(27,32)23-22(20)35-23/h7-8,12,14-15,17-18,20-24,31-32H,9-11,13H2,1-6H3/t14-,15-,17?,18+,20+,21-,22-,23-,24+,25+,26-,27-,28+,29-/m0/s1	XJCAVDMPVGWPEJ-NOAHKTBOSA-N	Nicandra physalodes	2017	10.1016/j.phytochem.2017.02.009	105
253	Nicanlode K	C28H38O7	486.262	486.605	O=C1[C@@]2(C)[C@]([C@@H](O3)[C@@H]3[C@]4([H])[C@]2([H])C[C@@H](O)[C@@]5(C)[C@@]4([H])CC=C5[C@@H]([C@]6([H])O[C@@H](O)[C@@](C)(O7)[C@]7(C)C6)C)(O)CC=C1	InChI=1S/C28H38O7/c1-13(17-12-24(2)27(5,35-24)23(31)33-17)14-8-9-15-20-16(11-19(30)25(14,15)3)26(4)18(29)7-6-10-28(26,32)22-21(20)34-22/h6-8,13,15-17,19-23,30-32H,9-12H2,1-5H3/t13-,15-,16-,17+,19+,20-,21-,22-,23+,24-,25+,26-,27+,28-/m0/s1	IVYADPVLGPMSTO-CYIUWTOSSA-N	Nicandra physalodes	2017	10.1016/j.phytochem.2017.02.009	105
254	Nicanlode L	C28H38O7	486.262	486.605	O=C1[C@@]2(C)[C@]([C@@H](O3)[C@@H]3[C@]4([H])[C@]2([H])C[C@H](O)[C@@]5(C)[C@@]4([H])CC=C5[C@@H]([C@]6([H])O[C@@H](O)[C@@](C)(O7)[C@]7(C)C6)C)(O)CC=C1	InChI=1S/C28H38O7/c1-13(17-12-24(2)27(5,35-24)23(31)33-17)14-8-9-15-20-16(11-19(30)25(14,15)3)26(4)18(29)7-6-10-28(26,32)22-21(20)34-22/h6-8,13,15-17,19-23,30-32H,9-12H2,1-5H3/t13-,15-,16-,17+,19-,20-,21-,22-,23+,24-,25+,26-,27+,28-/m0/s1	IVYADPVLGPMSTO-OQGFQZNZSA-N	Nicandra physalodes	2017	10.1016/j.phytochem.2017.02.009	105
255	Nicanlode M	C28H38O7	486.262	486.605	O=C1[C@@]2(C)[C@]([C@@H](O3)[C@@H]3[C@]4([H])[C@]2([H])CC[C@@]5(CO)[C@@]4([H])CC=C5[C@@H]([C@]6([H])O[C@@H](O)[C@@](C)(O7)[C@]7(C)C6)C)(O)CC=C1	InChI=1S/C28H38O7/c1-14(18-12-24(2)26(4,35-24)23(31)33-18)15-7-8-17-20-16(9-11-27(15,17)13-29)25(3)19(30)6-5-10-28(25,32)22-21(20)34-22/h5-7,14,16-18,20-23,29,31-32H,8-13H2,1-4H3/t14-,16-,17-,18+,20+,21-,22-,23+,24-,25-,26+,27-,28-/m0/s1	INEJVKNVRQJZEV-QNLYTQSTSA-N	Nicandra physalodes	2017	10.1016/j.phytochem.2017.02.009	105
256	15-Oxo-nicaphysalin B	C28H36O7	484.246	484.589	O=C1[C@@]2(C)[C@]([C@@H](O3)[C@@H]3[C@]4([H])[C@]2([H])CC[C@@]5(C)[C@@]4([H])C(C=C5[C@@H]([C@]6([H])O[C@@H](O)[C@@](C)(O7)[C@]7(C)C6)C)=O)(O)CC=C1	InChI=1S/C28H36O7/c1-13(17-12-25(3)27(5,35-25)23(31)33-17)15-11-16(29)20-19-14(8-10-24(15,20)2)26(4)18(30)7-6-9-28(26,32)22-21(19)34-22/h6-7,11,13-14,17,19-23,31-32H,8-10,12H2,1-5H3/t13-,14-,17+,19+,20-,21-,22-,23+,24+,25-,26-,27+,28-/m0/s1	HWAZMGAGWGTRCR-JUQUKENASA-N	Nicandra physalodes	2018	10.21577/0103-5053.20170105	106
257	Nicanlode H	C29H42O7	502.293	502.648	O=C1[C@@]2(C)[C@]([C@@H](O3)[C@@H]3[C@]4([H])[C@]2([H])CC[C@@]5(C)[C@@]4([H])CC[C@@]5(O)[C@@H]([C@]6([H])O[C@@H](OC)[C@@](C)(O7)[C@]7(C)C6)C)(O)CC=C1	InChI=1S/C29H42O7/c1-15(18-14-25(3)27(5,36-25)23(33-6)34-18)28(31)13-10-16-20-17(9-12-24(16,28)2)26(4)19(30)8-7-11-29(26,32)22-21(20)35-22/h7-8,15-18,20-23,31-32H,9-14H2,1-6H3/t15-,16+,17+,18-,20+,21+,22+,23?,24+,25+,26+,27-,28-,29+/m1/s1	JIOSLPSZLPCTFT-NWTUVACRSA-N	Nicandra physalodes	2017	10.1016/j.phytochem.2017.02.009	105
258	(20S,22R,24R,25S,26R/S)-6α,7α:22,26-Diepoxy-5α,24,25,26-tetrahydroxy-5α-ergost-2,14,16-trien-1-one	C28H38O7	486.262	486.605	O=C1[C@@]2(C)[C@]([C@@H](O3)[C@@H]3[C@]4([H])[C@]2([H])CC[C@@]5(C)C4=CC=C5[C@@H]([C@]6([H])OC(O)[C@](O)(C)[C@](C)(O)C6)C)(O)CC=C1	InChI=1S/C28H38O7/c1-14(18-13-25(3,31)27(5,32)23(30)34-18)15-8-9-16-20-17(10-12-24(15,16)2)26(4)19(29)7-6-11-28(26,33)22-21(20)35-22/h6-9,14,17-18,20-23,30-33H,10-13H2,1-5H3/t14-,17-,18+,20-,21-,22-,23?,24+,25+,26-,27+,28-/m0/s1	RUNOPYJKGXQLEN-SEOOOBDJSA-N	Nicandra physaloides	2018	10.1016/j.jff.2017.10.043	107
259	(20S,22R,24R,25S,26R/S)-6α,7α:22,26-Diepoxy-5α,24,25,26-tetrahydroxy-5α-ergost-2,16-dien-1,15-dione	C28H38O8	502.257	502.604	O=C1[C@@]2(C)[C@]([C@@H](O3)[C@@H]3[C@]4([H])[C@]2([H])CC[C@@]5(C)C4C(C=C5[C@@H]([C@]6([H])OC(O)[C@](O)(C)[C@](C)(O)C6)C)=O)(O)CC=C1	InChI=1S/C28H38O8/c1-13(17-12-25(3,32)27(5,33)23(31)35-17)15-11-16(29)20-19-14(8-10-24(15,20)2)26(4)18(30)7-6-9-28(26,34)22-21(19)36-22/h6-7,11,13-14,17,19-23,31-34H,8-10,12H2,1-5H3/t13-,14-,17+,19+,20?,21-,22-,23?,24+,25+,26-,27+,28-/m0/s1	RWDDIAMZTAOFMJ-YOPZWHNZSA-N	Nicandra physaloides	2018	10.1016/j.jff.2017.10.043	107
260	(20S,22R,24R,25S,26R)-6α,7α;22,26-Diepoxy-5α,24,25,26-tetrahydroxy-5α-ergost-2-en-1,12-dione	C28H40O8	504.272	504.62	O=C1[C@@]2(C)[C@]([C@@H](O3)[C@@H]3[C@]([C@@]4([H])[C@@]5(C)C([C@@H]([C@]6([H])OC(O)[C@](O)(C)[C@](C)(O)C6)C)CC4)([H])[C@]2([H])CC5=O)(O)CC=C1	InChI=1S/C28H40O8/c1-13(17-12-24(2,32)27(5,33)23(31)35-17)14-8-9-15-20-16(11-19(30)25(14,15)3)26(4)18(29)7-6-10-28(26,34)22-21(20)36-22/h6-7,13-17,20-23,31-34H,8-12H2,1-5H3/t13-,14?,15-,16-,17+,20-,21-,22-,23?,24+,25+,26-,27+,28-/m0/s1	MIJLHXXDEBPBDI-ZMKDPZCRSA-N	Nicandra physaloides	2018	10.1016/j.jff.2017.10.043	107
261	24α,25β-Dihydroxy-nicandrenone-2	C28H42O8	506.288	506.636	O=C1[C@@]2(C)[C@]([C@@H](O3)[C@@H]3[C@]4([H])[C@]2([H])CC[C@@]5(C)[C@@]4([H])CC[C@]5(O)[C@@H]([C@]6([H])O[C@@H](O)[C@](C)(O)[C@@](C)(O)C6)C)(O)CC=C1	InChI=1S/C28H42O8/c1-14(17-13-24(3,31)26(5,32)22(30)35-17)27(33)12-9-15-19-16(8-11-23(15,27)2)25(4)18(29)7-6-10-28(25,34)21-20(19)36-21/h6-7,14-17,19-22,30-34H,8-13H2,1-5H3/t14-,15+,16+,17-,19+,20+,21+,22-,23+,24+,25+,26+,27+,28+/m1/s1	POGTVFZFVAVEMP-BHVDZJICSA-N	Nicandra physalodes	2018	10.21577/0103-5053.20170105	106
262	16,17-Dehydro-24-epi-dioscorolide A	C28H38O6	470.267	470.606	O=C1[C@@]2(C)[C@]([C@@H](O3)[C@@H]3[C@]4([H])[C@]2([H])CC[C@@]5(C)[C@@]4([H])CC=C5[C@@H]([C@]6([H])OC([C@H](C)[C@](C)(O)C6)=O)C)(O)CC=C1	InChI=1S/C28H38O6/c1-14(19-13-26(4,31)15(2)24(30)33-19)16-8-9-17-21-18(10-12-25(16,17)3)27(5)20(29)7-6-11-28(27,32)23-22(21)34-23/h6-8,14-15,17-19,21-23,31-32H,9-13H2,1-5H3/t14-,15-,17-,18-,19+,21-,22-,23-,25+,26+,27-,28-/m0/s1	FTVQIDYDISXEIM-HNEDVOCSSA-N	Physalis philadelphica	2018	10.1016/j.phytochem.2018.04.018	44
263	16-Oxo-17(20)-dehydrohyoscyamilactol	C28H36O7	484.246	484.589	O=C1[C@@]2(C)[C@]([C@@H](O3)[C@@H]3[C@]4([H])[C@]2([H])CC[C@@]5(C)[C@]4(CC(/C5=C([C@]6([H])O[C@@H](O)[C@@](C)(O7)[C@]7(C)C6)/C)=O)[H])(O)CC=C1	InChI=1S/C28H36O7/c1-13(17-12-25(3)27(5,35-25)23(31)33-17)20-16(29)11-15-19-14(8-10-24(15,20)2)26(4)18(30)7-6-9-28(26,32)22-21(19)34-22/h6-7,14-15,17,19,21-23,31-32H,8-12H2,1-5H3/b20-13+/t14-,15-,17+,19+,21-,22-,23+,24-,25-,26-,27+,28-/m0/s1	WQTWUCNTUVQWEO-PSVGPMSISA-N	Physalis crassifolia	2016	10.1021/acs.jnatprod.5b00911	76
264	Withasilolide E	C28H36O7	484.246	484.589	O=C1[C@@]2(C)[C@]([C@@H](O3)[C@@H]3[C@]4([H])[C@]2([H])CC[C@@]5(C)[C@@]4([H])C[C@@H](O)/C5=C(C)\[C@]6([H])OC(C(CO)=C(C)C6)=O)(O)CC=C1	InChI=1S/C28H36O7/c1-13-10-19(34-25(32)15(13)12-29)14(2)22-18(30)11-17-21-16(7-9-26(17,22)3)27(4)20(31)6-5-8-28(27,33)24-23(21)35-24/h5-6,16-19,21,23-24,29-30,33H,7-12H2,1-4H3/b22-14+/t16-,17-,18+,19+,21+,23-,24-,26-,27-,28-/m0/s1	NMZHECSJDCUBJL-TWUWFWNSSA-N	Withania somnifera	2019	10.1021/acs.jnatprod.8b00665	99
265	Withasilolide F	C30H38O8	526.257	526.626	O=C1[C@@]2(C)[C@]([C@@H](O3)[C@@H]3[C@]4([H])[C@]2([H])CC[C@@]5(C)[C@@]4([H])C[C@@H](OC(C)=O)/C5=C(C)\[C@]6([H])OC(C(CO)=C(C)C6)=O)(O)CC=C1	InChI=1S/C30H38O8/c1-14-11-20(37-27(34)17(14)13-31)15(2)24-21(36-16(3)32)12-19-23-18(8-10-28(19,24)4)29(5)22(33)7-6-9-30(29,35)26-25(23)38-26/h6-7,18-21,23,25-26,31,35H,8-13H2,1-5H3/b24-15+/t18-,19-,20+,21?,23+,25-,26-,28-,29-,30-/m0/s1	GAZAMYJJRPZMNN-IBQIKAHYSA-N	Withania somnifera	2019	10.1021/acs.jnatprod.8b00665	99
266	Withacoagulinyl tetraglucoside	C56H84O28	1204.51	1205.26	O=C1[C@@]2(C)[C@]([C@@H](O[C@@H]([C@@H]3O)O[C@H](CO[C@@H]([C@@H]4O)O[C@H](CO[C@@H]([C@@H]5O)O[C@H](CO[C@@H]([C@@H]6O)O[C@H](CO)[C@@H](O)[C@@H]6O)[C@@H](O)[C@@H]5O)[C@@H](O)[C@@H]4O)[C@@H](O)[C@@H]3O)C[C@]7([H])[C@]2([H])CC[C@@]8(C)[C@@]7([H])CC[C@]8([H])[C@@]([C@]9([H])OC(C(C)=C(C)C9)=O)(C)OC(C)=O)(OC(C)=O)CC=C1	InChI=1S/C56H84O28/c1-21-15-34(81-48(73)22(21)2)55(7,83-23(3)58)32-11-10-26-25-16-35(56(84-24(4)59)13-8-9-33(60)54(56,6)27(25)12-14-53(26,32)5)82-52-47(72)43(68)39(64)31(80-52)20-76-51-46(71)42(67)38(63)30(79-51)19-75-50-45(70)41(66)37(62)29(78-50)18-74-49-44(69)40(65)36(61)28(17-57)77-49/h8-9,25-32,34-47,49-52,57,61-72H,10-20H2,1-7H3/t25-,26-,27-,28+,29+,30+,31+,32-,34+,35-,36+,37+,38+,39+,40-,4…	YOOLQLNPFPFBGA-YZPSQGBDSA-N	Withania coagulans Dunal	2014	PMID: 25265822	108
267	(20S,22R,24S,25S,26R)-15α-Acetoxy-6α-chloro-22,26:24,25-diepoxy-4β,5β,26-trihydroxyergost-2-en-1-one	C30H43ClO9	582.26	583.115	O=C1[C@@]2(C)[C@@]([C@@H](Cl)C[C@]3([H])[C@]2([H])CC[C@@]4(C)[C@@]3([H])[C@@H](OC(C)=O)C[C@]4(O)[C@@H]([C@]5([H])O[C@@H](O)[C@@](C)(O6)[C@]6(C)C5)C)(O)[C@@H](O)C=C1	InChI=1S/C30H43ClO9/c1-14(18-12-26(4)28(6,40-26)24(35)39-18)29(36)13-19(38-15(2)32)23-16-11-20(31)30(37)22(34)8-7-21(33)27(30,5)17(16)9-10-25(23,29)3/h7-8,14,16-20,22-24,34-37H,9-13H2,1-6H3/t14-,16-,17+,18-,19?,20+,22+,23-,24-,25+,26+,27+,28-,29+,30+/m1/s1	UQBGUQBDHGPXAM-JLOYOYLJSA-N	Physalis pubescens L.	2016	10.1039/c6ra07031k	49
268	rel-(20R,22R)-16α-Acetoxy-6α-chloro-4β,5β,20β-trihydroxy-1-oxowitha-2,24-dienolide	C30H41ClO8	564.249	565.1	O=C1[C@@]2(C)[C@@]([C@@H](Cl)C[C@]3([H])[C@]2([H])CC[C@@]4(C)[C@@]3([H])C[C@@H](OC(C)=O)[C@]4([H])[C@@]([C@]5([H])OC(C(C)=C(C)C5)=O)(C)O)(O)[C@@H](O)C=C1	InChI=1S/C30H41ClO8/c1-14-11-24(39-26(35)15(14)2)29(6,36)25-20(38-16(3)32)13-19-17-12-21(31)30(37)23(34)8-7-22(33)28(30,5)18(17)9-10-27(19,25)4/h7-8,17-21,23-25,34,36-37H,9-13H2,1-6H3/t17-,18+,19+,20?,21+,23+,24-,25+,27+,28+,29+,30+/m1/s1	JLOIXXJTVKQFDX-RZNXLJGMSA-N	Acnistus arborescens	2016	10.1016/j.phytochem.2016.07.003	37
269	27-Acetoxy-4β,6α-dihydroxy-5β-chloro-1-oxowitha-2,24-dienolide	C30H41ClO7	548.254	549.101	O=C1[C@@]2(C)[C@@]([C@@H](O)C[C@]3([H])[C@]2([H])CC[C@@]4(C)[C@@]3([H])CC[C@]4([H])[C@@H]([C@]5([H])OC(C(COC(C)=O)=C(C)C5)=O)C)(Cl)[C@@H](O)C=C1	InChI=1S/C30H41ClO7/c1-15-12-23(38-27(36)19(15)14-37-17(3)32)16(2)20-6-7-21-18-13-26(35)30(31)25(34)9-8-24(33)29(30,5)22(18)10-11-28(20,21)4/h8-9,16,18,20-23,25-26,34-35H,6-7,10-14H2,1-5H3/t16-,18-,20+,21-,22-,23+,25-,26-,28+,29-,30+/m0/s1	QHMDCWZBRBSIBR-JCHDPGCGSA-N	Withania somnifera	2010	10.1016/j.phytochem.2010.08.019	41
270	6α-Chloro-5β,17α-dihydroxywithaferin A	C28H39ClO7	522.238	523.063	O=C1[C@@]2(C)[C@@]([C@@H](Cl)C[C@]3([H])[C@]2([H])CC[C@@]4(C)[C@@]3([H])CC[C@]4(O)[C@@H]([C@]5([H])OC(C(CO)=C(C)C5)=O)C)(O)[C@@H](O)C=C1	InChI=1S/C28H39ClO7/c1-14-11-20(36-24(33)17(14)13-30)15(2)27(34)10-8-18-16-12-21(29)28(35)23(32)6-5-22(31)26(28,4)19(16)7-9-25(18,27)3/h5-6,15-16,18-21,23,30,32,34-35H,7-13H2,1-4H3/t15-,16+,18+,19+,20-,21+,23+,25+,26+,27+,28+/m1/s1	PILJPDJXARWZKZ-DBZLVEAZSA-N	Withania somnifera	2011	10.1016/j.phytol.2011.04.016	109
271	6-O-Acetylphysanicandrolide C	C32H43ClO9	606.26	607.137	O=C1[C@@]2(C)[C@]([C@H](OC(C)=O)C[C@]3([H])[C@]2([H])CC[C@@]4(C)[C@]3(O)[C@@H](OC(C)=O)C[C@]4([H])[C@@]([C@]5([H])OC(C(C)=C(C)C5)=O)(C)O)(Cl)CC=C1	InChI=1S/C32H43ClO9/c1-16-13-24(42-27(37)17(16)2)30(7,38)22-15-26(41-19(4)35)32(39)21-14-25(40-18(3)34)31(33)11-8-9-23(36)29(31,6)20(21)10-12-28(22,32)5/h8-9,20-22,24-26,38-39H,10-15H2,1-7H3/t20-,21+,22-,24+,25?,26?,28+,29-,30+,31-,32+/m0/s1	PCPQWSVNJZLYIK-PVEPBWSKSA-N	Physalis nicandroides var. attenuata	2019	10.1021/acs.jnatprod.9b00233	29
272	Physanicandrolide C	C30H41ClO8	564.249	565.1	O=C1[C@@]2(C)[C@]([C@H](O)C[C@]3([H])[C@]2([H])CC[C@@]4(C)[C@]3(O)[C@@H](OC(C)=O)C[C@]4([H])[C@@]([C@]5([H])OC(C(C)=C(C)C5)=O)(C)O)(Cl)CC=C1	InChI=1S/C30H41ClO8/c1-15-12-23(39-25(35)16(15)2)28(6,36)20-14-24(38-17(3)32)30(37)19-13-22(34)29(31)10-7-8-21(33)27(29,5)18(19)9-11-26(20,30)4/h7-8,18-20,22-24,34,36-37H,9-14H2,1-6H3/t18-,19+,20-,22+,23+,24?,26+,27-,28+,29-,30+/m0/s1	LUAPYQAOQYNFJL-XIJNIYMOSA-N	Physalis nicandroides var. attenuata	2019	10.1021/acs.jnatprod.9b00233	29
273	Jaborosalactol 23	C28H41ClO7	524.254	525.079	C[C@@]12[C@]([C@H](O)C[C@]3([H])[C@]2([H])CC[C@@]4(C)[C@@]3(O)CC[C@]4(O)[C@@H]([C@]5([H])O[C@@H](O)[C@@](C)(O6)[C@]6(C)C5)C)(Cl)CC=CC1=O	InChI=1S/C28H41ClO7/c1-15(18-14-23(3)25(5,36-23)21(32)35-18)27(33)11-12-28(34)17-13-20(31)26(29)9-6-7-19(30)24(26,4)16(17)8-10-22(27,28)2/h6-7,15-18,20-21,31-34H,8-14H2,1-5H3/t15-,16+,17-,18-,20-,21-,22-,23+,24+,25-,26+,27+,28-/m1/s1	NGDNSEJCTJLCLZ-WMJZMTNOSA-N	Jaborosa bergii	2016	10.1021/acs.jnatprod.5b00648	62	jaborosalactol 23
274	Jaborosalactone 8	C28H40O7	488.277	488.621	C[C@@]12[C@]([C@H](O)C[C@]3([H])[C@]2([H])CC[C@@]4(C)[C@@]3(O)CC[C@]4(O)[C@@H]([C@]5([H])OC(C(C)=C(C)C5)=O)C)(O)CC=CC1=O	InChI=1S/C28H40O7/c1-15-13-20(35-23(31)16(15)2)17(3)26(32)11-12-27(33)19-14-22(30)28(34)9-6-7-21(29)25(28,5)18(19)8-10-24(26,27)4/h6-7,17-20,22,30,32-34H,8-14H2,1-5H3/t17-,18+,19-,20-,22-,24-,25+,26+,27-,28+/m1/s1	BRUVTAOWMQDMJB-CAEJVNCGSA-N	Jaborosa leucotricha	2015	10.1021/np500824f	62	jaborosalactone 8
275	16-Oxojaborosalactone E	C28H37ClO6	504.228	505.048	O=C1[C@@]2(C)[C@]([C@H](O)CC3C2CC[C@@]4(C)C3CC([C@]4([H])[C@@H](C5OC(C(CO)=C(C)C5)=O)C)=O)(Cl)CC=C1	InChI=1S/C28H37ClO6/c1-14-10-21(35-25(34)17(14)13-30)15(2)24-20(31)12-19-16-11-23(33)28(29)8-5-6-22(32)27(28,4)18(16)7-9-26(19,24)3/h5-6,15-16,18-19,21,23-24,30,33H,7-13H2,1-4H3/t15-,16?,18?,19?,21?,23-,24+,26+,27+,28+/m1/s1	NSPHUXHTGQTPPN-MNJPUILASA-N	Nicandra john-tyleriana	2015	10.1021/np500824f	31
276	16-Oxo-27-deoxyjaborosalactone D	C28H38O6	470.267	470.606	O=C1[C@@]2(C)[C@]([C@H](O)CC3C2CC[C@@]4(C)C3CC([C@]4([H])[C@@H](C5OC(C(C)=C(C)C5)=O)C)=O)(O)CC=C1	InChI=1S/C28H38O6/c1-14-11-21(34-25(32)15(14)2)16(3)24-20(29)13-19-17-12-23(31)28(33)9-6-7-22(30)27(28,5)18(17)8-10-26(19,24)4/h6-7,16-19,21,23-24,31,33H,8-13H2,1-5H3/t16-,17?,18?,19?,21?,23-,24+,26+,27+,28+/m1/s1	DAGAJEBELUBLSP-IKBXIUDWSA-N	Nicandra john-tyleriana	2015	10.1021/np500824f	31
277	16-Oxojaborosalactone D	C28H38O7	486.262	486.605	O=C1[C@@]2(C)[C@]([C@H](O)CC3C2CC[C@@]4(C)C3CC([C@]4([H])[C@@H](C5OC(C(CO)=C(C)C5)=O)C)=O)(O)CC=C1	InChI=1S/C28H38O7/c1-14-10-21(35-25(33)17(14)13-29)15(2)24-20(30)12-19-16-11-23(32)28(34)8-5-6-22(31)27(28,4)18(16)7-9-26(19,24)3/h5-6,15-16,18-19,21,23-24,29,32,34H,7-13H2,1-4H3/t15-,16?,18?,19?,21?,23-,24+,26+,27+,28+/m1/s1	HMNWYTHNGPJCQE-MNJPUILASA-N	Nicandra john-tyleriana	2015	10.1021/np500824f	31
278	Withaneomexolide D	C30H42O9	546.283	546.657	O=C1[C@@]2(C)[C@]([C@H](O)C[C@]3([H])[C@]2([H])CC[C@@]4(C)[C@]3(O)[C@@H](OC(C)=O)C[C@]4([H])[C@@](C)(O)[C@@]5([H])OC(C(C)=C(C)C5)=O)(O)CC=C1	InChI=1S/C30H42O9/c1-15-12-23(39-25(34)16(15)2)28(6,35)20-14-24(38-17(3)31)30(37)19-13-22(33)29(36)10-7-8-21(32)27(29,5)18(19)9-11-26(20,30)4/h7-8,18-20,22-24,33,35-37H,9-14H2,1-6H3/t18-,19+,20-,22+,23-,24?,26+,27-,28+,29-,30+/m0/s1	UIXNMQUWMPYKDX-PTPPYDARSA-N	Physalis neomexicana	2015	10.1021/acs.jnatprod.5b00698	27
279	Physangulatin M	C30H42O7	514.293	514.659	O=C1[C@@]2(C)[C@]([C@H](O)C[C@]3([H])[C@]2([H])CC[C@@]4(C)[C@@]3([H])[C@@H](OC(C)=O)C[C@]4([H])[C@@H]([C@]5([H])OC(C(C)=C(C)C5)=O)C)(O)CC=C1	InChI=1S/C30H42O7/c1-15-12-22(37-27(34)16(15)2)17(3)21-14-23(36-18(4)31)26-19-13-25(33)30(35)10-7-8-24(32)29(30,6)20(19)9-11-28(21,26)5/h7-8,17,19-23,25-26,33,35H,9-14H2,1-6H3/t17-,19+,20-,21+,22+,23?,25+,26+,28+,29-,30-/m0/s1	CHIZNGYJETWLOP-VVYJVVJJSA-N	Physalis angulata L.	2016	10.1021/acs.jnatprod.6b00094	66
280	Physangulatin N	C28H40O7	488.277	488.621	O=C1[C@@]2(C)[C@]([C@H](O)C[C@]3([H])[C@]2([H])CC[C@@]4(C)[C@@]3([H])[C@@H](O)C[C@]4([H])[C@@]([C@]5([H])OC(C(C)=C(C)C5)=O)(C)O)(O)CC=C1	InChI=1S/C28H40O7/c1-14-11-22(35-24(32)15(14)2)27(5,33)19-13-18(29)23-16-12-21(31)28(34)9-6-7-20(30)26(28,4)17(16)8-10-25(19,23)3/h6-7,16-19,21-23,29,31,33-34H,8-13H2,1-5H3/t16-,17+,18+,19+,21-,22-,23-,25-,26+,27-,28+/m1/s1	MCTYYTNYCHPLJY-HXRKORLCSA-N	Physalis angulata L.	2016	10.1021/acs.jnatprod.6b00094	66
281	Physagulide A	C30H42O9	546.283	546.657	O=C1[C@@]2(C)[C@]([C@H](O)C[C@]3([H])[C@]2([H])CC[C@@]4(C)[C@]3(O)[C@@H](OC(C)=O)C[C@]4([H])[C@@H]([C@]5([H])OC(C(C)=C(CO)C5)=O)C)(O)CC=C1	InChI=1S/C30H42O9/c1-15-18(14-31)11-22(39-26(15)35)16(2)20-13-25(38-17(3)32)30(37)21-12-24(34)29(36)9-6-7-23(33)28(29,5)19(21)8-10-27(20,30)4/h6-7,16,19-22,24-25,31,34,36-37H,8-14H2,1-5H3/t16-,19-,20+,21+,22+,24+,25?,27+,28-,29-,30+/m0/s1	KRZYTYSYXBLUIA-CORJHCHLSA-N	Physalis angulata var. villosa	2016	10.1039/c6ra08574a	67
282	Physagulide E	C30H42O9	546.283	546.657	O=C1[C@@]2(C)[C@]([C@H](O)C[C@]3([H])[C@]2([H])CC[C@@]4(C)[C@]3(O)[C@@H](OC(C)=O)C[C@]4(O)[C@@H]([C@]5([H])OC(C(C)=C(C)C5)=O)C)(O)CC=C1	InChI=1S/C30H42O9/c1-15-12-21(39-25(34)16(15)2)17(3)29(36)14-24(38-18(4)31)30(37)20-13-23(33)28(35)10-7-8-22(32)27(28,6)19(20)9-11-26(29,30)5/h7-8,17,19-21,23-24,33,35-37H,9-14H2,1-6H3/t17-,19+,20-,21-,23-,24?,26-,27+,28+,29+,30-/m1/s1	URZHQDOZWJFQSH-HXJCGOOZSA-N	Physalis angulata var. villosa	2016	10.1039/c6ra08574a	67
283	Baimantuoluoline P	C30H44O8	532.304	532.674	O=C1[C@@]2(C)[C@]([C@H](O)C[C@]3([H])[C@]2([H])C[C@@H](O)[C@@]4(C)[C@@]3([H])CC[C@]4([H])[C@H](CO)[C@]5([H])OC(C(COCC)=C(C)C5)=O)(O)CC=C1	InChI=1S/C30H44O8/c1-5-37-15-19-16(2)11-23(38-27(19)35)18(14-31)21-9-8-20-17-12-26(34)30(36)10-6-7-24(32)29(30,4)22(17)13-25(33)28(20,21)3/h6-7,17-18,20-23,25-26,31,33-34,36H,5,8-15H2,1-4H3/t17-,18-,20-,21+,22-,23+,25+,26+,28-,29-,30-/m0/s1	UMRWYLBZIQVRFZ-XBXJCFNRSA-N	Datura metel L.	2020	10.1016/j.fitote.2019.104468	89
284	Baimantuoluoline Q	C30H44O7	516.309	516.675	O=C1[C@@]2(C)[C@]([C@H](O)C[C@]3([H])[C@]2([H])CC[C@@]4(C)[C@@]3([H])CC[C@]4([H])[C@H](CO)[C@]5([H])OC(C(COCC)=C(C)C5)=O)(O)CC=C1	InChI=1S/C30H44O7/c1-5-36-16-20-17(2)13-24(37-27(20)34)19(15-31)22-9-8-21-18-14-26(33)30(35)11-6-7-25(32)29(30,4)23(18)10-12-28(21,22)3/h6-7,18-19,21-24,26,31,33,35H,5,8-16H2,1-4H3/t18-,19-,21-,22+,23-,24+,26+,28-,29-,30-/m0/s1	GQMYIBLZUGGOAI-IAIQJRAUSA-N	Datura metel L.	2020	10.1016/j.fitote.2019.104468	89
285	Baimantuoluoline L	C28H40O8	504.272	504.62	O=C1[C@@]2(C)[C@]([C@H](O)[C@@H](O)[C@]3([H])[C@]2([H])C[C@@H](O)[C@@]4(C)[C@@]3([H])CC[C@]4([H])[C@H](C)[C@]5([H])OC(C(CO)=C(C)C5)=O)(O)CC=C1	InChI=1S/C28H40O8/c1-13-10-19(36-25(34)15(13)12-29)14(2)16-7-8-17-22-18(11-21(31)26(16,17)3)27(4)20(30)6-5-9-28(27,35)24(33)23(22)32/h5-6,14,16-19,21-24,29,31-33,35H,7-12H2,1-4H3/t14-,16+,17-,18-,19+,21+,22-,23-,24+,26+,27-,28-/m0/s1	PMSPVEFGJLNWKU-SRRGGWOFSA-N	Datura metel L.	2020	10.1016/j.fitote.2019.104468	89
286	Baimantuoluoline M	C30H44O8	532.304	532.674	O=C1[C@@]2(C)[C@]([C@H](O)[C@@H](O)[C@]3([H])[C@]2([H])C[C@@H](O)[C@@]4(C)[C@@]3([H])CC[C@]4([H])[C@H](C)[C@]5([H])OC(C(COCC)=C(C)C5)=O)(O)CC=C1	InChI=1S/C30H44O8/c1-6-37-14-17-15(2)12-21(38-27(17)35)16(3)18-9-10-19-24-20(13-23(32)28(18,19)4)29(5)22(31)8-7-11-30(29,36)26(34)25(24)33/h7-8,16,18-21,23-26,32-34,36H,6,9-14H2,1-5H3/t16-,18+,19-,20-,21+,23+,24-,25-,26+,28+,29-,30-/m0/s1	UKBZFRDGRKMZLQ-HVROXFCLSA-N	Datura metel L.	2020	10.1016/j.fitote.2019.104468	89
287	Physagulide B	C30H42O9	546.283	546.657	O=C1[C@@]2(C)[C@]([C@H](O)C[C@]3([H])[C@]2([H])CC[C@@]4(C)[C@]3(O)[C@@H](OC(C)=O)C[C@]4([H])[C@@H]([C@]5([H])OC(C(C)=C(C)C5O)=O)C)(O)CC=C1	InChI=1S/C30H42O9/c1-14-15(2)26(35)39-25(24(14)34)16(3)19-13-23(38-17(4)31)30(37)20-12-22(33)29(36)10-7-8-21(32)28(29,6)18(20)9-11-27(19,30)5/h7-8,16,18-20,22-25,33-34,36-37H,9-13H2,1-6H3/t16-,18-,19+,20+,22+,23?,24?,25-,27+,28-,29-,30+/m0/s1	ZMPYDQCRBKKPKJ-GDZYCRNVSA-N	Physalis angulata var. villosa	2016	10.1039/c6ra08574a	67
288	Physaliolide B	C30H42O9	546.283	546.657	O=C1[C@@]2(C)[C@]([C@H](O)C[C@]3([H])[C@]2([H])CC[C@@]4(C)[C@]3(O)[C@@H](OC(C)=O)C[C@]4([H])[C@@H]([C@]5([H])OC(C(C)=C(C)[C@@H]5O)=O)C)(O)CC=C1	InChI=1S/C30H42O9/c1-14-15(2)26(35)39-25(24(14)34)16(3)19-13-23(38-17(4)31)30(37)20-12-22(33)29(36)10-7-8-21(32)28(29,6)18(20)9-11-27(19,30)5/h7-8,16,18-20,22-25,33-34,36-37H,9-13H2,1-6H3/t16-,18-,19+,20+,22+,23?,24-,25-,27+,28-,29-,30+/m0/s1	ZMPYDQCRBKKPKJ-FTNVOOGSSA-N	Physalis minima L.	2018	10.1016/j.phytochem.2018.08.009	110
289	Physaliolide A	C30H42O9	546.283	546.657	O=C1[C@@]2(C)[C@]([C@H](O)C[C@]3([H])[C@]2([H])CC[C@@]4(C)[C@]3(O)[C@@H](OC(C)=O)C[C@]4([H])[C@@H]([C@]5([H])OC(C(C)=C(CO)C5)=O)C)(O)CC=C1	InChI=1S/C30H42O9/c1-15-18(14-31)11-22(39-26(15)35)16(2)20-13-25(38-17(3)32)30(37)21-12-24(34)29(36)9-6-7-23(33)28(29,5)19(21)8-10-27(20,30)4/h6-7,16,19-22,24-25,31,34,36-37H,8-14H2,1-5H3/t16-,19-,20+,21+,22+,24+,25?,27+,28-,29-,30+/m0/s1	KRZYTYSYXBLUIA-CORJHCHLSA-N	Physalis minima L.	2018	10.1016/j.phytochem.2018.08.009	110
290	Physaliolide D	C28H40O6	472.283	472.622	O=C1[C@@]2(C)[C@]([C@H](O)C[C@]3([H])[C@]2([H])CC[C@@]4(C)[C@]3(O)CC[C@]4([H])[C@@H]([C@]5([H])OC(C(C)=C(C)C5)=O)C)(O)CC=C1	InChI=1S/C28H40O6/c1-15-13-21(34-24(31)16(15)2)17(3)18-9-12-27(32)20-14-23(30)28(33)10-6-7-22(29)26(28,5)19(20)8-11-25(18,27)4/h6-7,17-21,23,30,32-33H,8-14H2,1-5H3/t17-,18+,19-,20+,21+,23+,25+,26-,27-,28-/m0/s1	CZAYSQGLPUUCTI-RSLBACPVSA-N	Physalis minima L.	2018	10.1016/j.phytochem.2018.08.009	110
291	Physaliolide F	C30H42O8	530.288	530.658	O=C1[C@@]2(C)[C@]([C@H](O)C[C@]3([H])[C@]2([H])CC[C@@]4(C)[C@@]3([H])[C@@H](OC(C)=O)C[C@]4([H])[C@@H]([C@]5([H])OC(C(CO)=C(C)C5)=O)C)(O)CC=C1	InChI=1S/C30H42O8/c1-15-11-22(38-27(35)19(15)14-31)16(2)21-13-23(37-17(3)32)26-18-12-25(34)30(36)9-6-7-24(33)29(30,5)20(18)8-10-28(21,26)4/h6-7,16,18,20-23,25-26,31,34,36H,8-14H2,1-5H3/t16-,18+,20-,21+,22+,23?,25+,26+,28+,29-,30-/m0/s1	NLZDNHOKYBYNRT-RPVNFZMWSA-N	Physalis minima L.	2018	10.1016/j.phytochem.2018.08.009	110
292	Physaliolide O	C30H42O9	546.283	546.657	C[C@@]12[C@]([C@H](O)C[C@]3([H])[C@]2([H])CC[C@@]4(C)[C@@]3(O)[C@@H](OC(C)=O)C[C@]4([H])[C@]([C@]5([H])OC(C(C)=C(C)C5)=O)(O)C)(O)CC=CC1=O	InChI=1S/C30H42O9/c1-15-12-23(39-25(34)16(15)2)28(6,35)20-14-24(38-17(3)31)30(37)19-13-22(33)29(36)10-7-8-21(32)27(29,5)18(19)9-11-26(20,30)4/h7-8,18-20,22-24,33,35-37H,9-14H2,1-6H3/t18-,19+,20-,22+,23+,24?,26+,27-,28+,29-,30-/m0/s1	UIXNMQUWMPYKDX-CZADBGTJSA-N	Physalis minima L.	2020	10.1021/acsomega.0c00467	111
293	Withaneomexolide C	C30H44O9	548.298	548.673	C[C@@]12[C@]([C@H](O)C[C@]3([H])[C@]2([H])CC[C@@]4(C)[C@]3(O)[C@@H](OC(C)=O)C[C@]4([H])[C@]([C@]5([H])OC([C@H](C)[C@@H](C)C5)=O)(O)C)(O)CC=CC1=O	InChI=1S/C30H44O9/c1-15-12-23(39-25(34)16(15)2)28(6,35)20-14-24(38-17(3)31)30(37)19-13-22(33)29(36)10-7-8-21(32)27(29,5)18(19)9-11-26(20,30)4/h7-8,15-16,18-20,22-24,33,35-37H,9-14H2,1-6H3/t15-,16+,18-,19+,20-,22+,23+,24?,26+,27-,28+,29-,30+/m0/s1	OLRRZBJFXBZICJ-MOUZCFGISA-N	Physalis neomexicana	2015	10.1021/acs.jnatprod.5b00698	27
294	Capsisteroid D	C28H44O8	508.304	508.652	O=C1[C@@]2(C)[C@]([C@H](O)C[C@]3([H])[C@]2([H])CC[C@@]4(C)[C@@]3([H])CC[C@]4(O)[C@@H]([C@]5([H])OC(O)[C@@](C)(O)[C@@](O)(C)C5)C)(O)CC=C1	InChI=1S/C28H44O8/c1-15(19-14-24(3,32)26(5,33)22(31)36-19)27(34)12-9-17-16-13-21(30)28(35)10-6-7-20(29)25(28,4)18(16)8-11-23(17,27)2/h6-7,15-19,21-22,30-35H,8-14H2,1-5H3/t15-,16+,17+,18+,19-,21-,22?,23+,24-,25+,26-,27+,28+/m1/s1	SQEGCWWETJEZMY-NDIFLSOISA-N	Solanum capsicoides	2015	10.1039/c5ra12014d	50
295	Capsisteroid I	C28H40O7	488.277	488.621	O=C1[C@@]2(C)[C@]([C@H](O)C[C@]3([H])[C@]2([H])CC[C@@]4(C)[C@@]3([H])CC[C@]4(O)[C@@H]([C@]5([H])OC([C@](C)(O6)[C@@]6(C)C5)=O)C)(O)CC=C1	InChI=1S/C28H40O7/c1-15(19-14-24(3)26(5,35-24)22(31)34-19)27(32)12-9-17-16-13-21(30)28(33)10-6-7-20(29)25(28,4)18(16)8-11-23(17,27)2/h6-7,15-19,21,30,32-33H,8-14H2,1-5H3/t15-,16+,17+,18+,19-,21-,23+,24-,25+,26+,27+,28+/m1/s1	TWTQSUZLLXLUCW-AJCJZWJKSA-N	Solanum capsicoides	2019	10.1246/bcsj.20180225	79
296	Salpichrolide Q	C30H44O8	532.304	532.674	O=C1[C@@]2(C)[C@]([C@H](O)C[C@]3([H])[C@]2([H])CC[C@@]4(C)[C@@]3([H])C[C@@H](OC(C)=O)[C@]4([H])[C@@H]([C@]5([H])O[C@@H](O)[C@@](C)(O6)[C@]6(C)C5)C)(O)CC=C1	InChI=1S/C30H44O8/c1-15(21-14-27(4)29(6,38-27)25(34)37-21)24-20(36-16(2)31)13-19-17-12-23(33)30(35)10-7-8-22(32)28(30,5)18(17)9-11-26(19,24)3/h7-8,15,17-21,23-25,33-35H,9-14H2,1-6H3/t15-,17-,18+,19+,20?,21-,23-,24+,25-,26+,27+,28+,29-,30+/m1/s1	IZJORFJPKBIAFL-PAZVSCEYSA-N	Salpichroa origanifolia	2013	10.1021/np400559p	112
297	Physaliolide N	C30H42O10	562.278	562.656	C[C@@]12[C@]([C@H](O)C[C@]3([H])[C@]2([H])CC[C@@]4(C)[C@@]3(O)[C@@H](OC(C)=O)C[C@]4([H])[C@]([C@]5([H])OC(C(C)=C(C)C5)=O)(O)C)(O)[C@@H](O)C=CC1=O	InChI=1S/C30H42O10/c1-14-11-23(40-25(35)15(14)2)28(6,36)19-13-24(39-16(3)31)29(37)18-12-22(34)30(38)21(33)8-7-20(32)27(30,5)17(18)9-10-26(19,29)4/h7-8,17-19,21-24,33-34,36-38H,9-13H2,1-6H3/t17-,18+,19-,21-,22+,23+,24?,26+,27-,28+,29-,30-/m0/s1	VSIIOZOKGVOISD-VDCGGZLCSA-N	Physalis minima L.	2020	10.1021/acsomega.0c00467	111
298	Physaminilide I	C30H42O9	546.283	546.657	O=C1[C@@]2(C)[C@@]([C@@H](O)C[C@]3([H])[C@]2([H])CC[C@@]4(C)[C@]3(O)[C@@H](OC(C)=O)CC4[C@@H]([C@]5([H])OC(C(C)=C(C)C5)=O)C)(O)[C@@H](O)C=C1	InChI=1S/C30H42O9/c1-14-11-21(39-26(35)15(14)2)16(3)19-13-25(38-17(4)31)29(36)20-12-24(34)30(37)23(33)8-7-22(32)28(30,6)18(20)9-10-27(19,29)5/h7-8,16,18-21,23-25,33-34,36-37H,9-13H2,1-6H3/t16-,18-,19?,20+,21+,23-,24-,25?,27+,28-,29+,30+/m0/s1	KKKBEHVSWVDQTQ-VQJRXSHVSA-N	Physalis minima L.	2020	10.1016/j.fitote.2020.104728	55
299	Alkekenginin B	C33H54O9	594.377	594.786	O=C1[C@@]2(C)[C@@]([C@@H](O)C[C@]3([H])[C@]2([H])CC[C@@]4(C)[C@]3([H])C[C@@H](O)[C@]4([H])[C@H](C)[C@]5([H])O[C@@H](OCC(C)CC)[C@@](C)(O)[C@@](O)(C)C5)(O)[C@@H](O)C=C1	InChI=1S/C33H54O9/c1-8-17(2)16-41-28-32(7,39)30(5,38)15-23(42-28)18(3)27-22(34)14-21-19-13-26(37)33(40)25(36)10-9-24(35)31(33,6)20(19)11-12-29(21,27)4/h9-10,17-23,25-28,34,36-40H,8,11-16H2,1-7H3/t17?,18-,19-,20+,21-,22-,23-,25+,26+,27+,28-,29+,30-,31+,32-,33-/m1/s1	FTALQDQRENBGEC-VZWCCQADSA-N	Physalis alkekengi L. var. franchetii (Mast.) Makino	2014	10.1016/j.phytol.2014.08.004	47
300	Baimantuoluoline N	C30H44O8	532.304	532.674	O=C1[C@@]2(C)[C@]([C@@H](O)[C@H](O)[C@]3([H])[C@]2([H])C[C@@H](O)[C@@]4(C)[C@@]3([H])CC[C@]4([H])[C@H](C)[C@]5([H])OC(C(COCC)=C(C)C5)=O)(O)CC=C1	InChI=1S/C30H44O8/c1-6-37-14-17-15(2)12-21(38-27(17)35)16(3)18-9-10-19-24-20(13-23(32)28(18,19)4)29(5)22(31)8-7-11-30(29,36)26(34)25(24)33/h7-8,16,18-21,23-26,32-34,36H,6,9-14H2,1-5H3/t16-,18+,19-,20-,21+,23+,24-,25+,26-,28+,29-,30-/m0/s1	UKBZFRDGRKMZLQ-NHQGEHOYSA-N	Datura metel L.	2020	10.1016/j.fitote.2019.104468	89
301	Dmetelin B	C29H42O5	470.303	470.65	O[C@@H]1[C@@]2(C)C(C=C[C@]3([H])[C@]2([H])CC[C@@]4(C)[C@@]3([H])CC[C@]4([H])[C@H](C)[C@]5([H])OC(C(CO)=C(C)C5)=O)=C[C@@H](OC)C1	InChI=1S/C29H42O5/c1-16-12-25(34-27(32)21(16)15-30)17(2)22-8-9-23-20-7-6-18-13-19(33-5)14-26(31)29(18,4)24(20)10-11-28(22,23)3/h6-7,13,17,19-20,22-26,30-31H,8-12,14-15H2,1-5H3/t17-,19+,20-,22+,23-,24-,25+,26-,28+,29-/m0/s1	FHUFFRPYKZQSSR-PTSYBLANSA-N	Datura metel L.	2014	10.3390/molecules19044548	80
302	Physapubescin C	C30H44O9	548.298	548.673	O=C1[C@@]2(C)[C@]([C@@H](O)C[C@]3([H])[C@]2([H])CC[C@@]4(C)[C@@]3([H])[C@@H](OC(C)=O)C[C@]4([H])[C@H](C)[C@@H]5O[C@@H](O)[C@@](C)(O6)[C@]6(C)C5)(O)C=C[C@H]1O	InChI=1S/C30H44O9/c1-14(21-13-27(4)29(6,39-27)25(35)38-21)18-12-20(37-15(2)31)23-16-11-22(33)30(36)10-8-19(32)24(34)28(30,5)17(16)7-9-26(18,23)3/h8,10,14,16-23,25,32-33,35-36H,7,9,11-13H2,1-6H3/t14-,16+,17-,18+,19+,20?,21+,22-,23+,25+,26+,27-,28-,29+,30-/m0/s1	IXNBAWSAIRYCFI-QQYIRAJMSA-N	Physalis pubescens L.	2013	10.1016/j.steroids.2013.05.008	52
303	3β,4β,5α,6β,27-Pentahydroxy-1-oxo-witha-24-enolide	C28H42O8	506.288	506.636	O=C1[C@@]2(C)[C@]([C@H](O)C[C@]3([H])[C@]2([H])CC[C@@]4(C)[C@@]3([H])CC[C@]4([H])[C@@H]([C@]5([H])OC(C(CO)=C(C)C5)=O)C)(O)[C@@H](O)[C@@H](O)C1	InChI=1S/C28H42O8/c1-13-9-21(36-25(34)16(13)12-29)14(2)17-5-6-18-15-10-23(32)28(35)24(33)20(30)11-22(31)27(28,4)19(15)7-8-26(17,18)3/h14-15,17-21,23-24,29-30,32-33,35H,5-12H2,1-4H3/t14-,15-,17+,18-,19-,20-,21+,23+,24-,26+,27-,28+/m0/s1	MRLVVVMKNONDOH-YGDYIFIGSA-N	Withania aristata	2012	10.1016/j.ejmech.2012.05.032	42
304	Capsisteroid E	C28H42O7	490.293	490.637	O=C1[C@@]2(C)C([C@H](O)C[C@]3([H])[C@]2([H])CC[C@@]4(C)[C@@]3([H])CC[C@]4(O)[C@@H]([C@]5([H])OC(O)[C@@](C)(O)[C@@](O)(C)C5)C)=CC=C1	InChI=1S/C28H42O7/c1-15(21-14-25(3,32)27(5,33)23(31)35-21)28(34)12-10-17-16-13-20(29)19-7-6-8-22(30)26(19,4)18(16)9-11-24(17,28)2/h6-8,15-18,20-21,23,29,31-34H,9-14H2,1-5H3/t15-,16+,17+,18+,20-,21-,23?,24+,25-,26-,27-,28+/m1/s1	RTCCYPZNZLQGIW-RSVZHHMWSA-N	Solanum capsicoides	2015	10.1039/c5ra12014d	50
305	Physagulin P1	C30H40O7	512.277	512.643	O=C1[C@@]2(C)C([C@H](O)C[C@]3([H])[C@]2([H])CC[C@@]4(C)[C@]3(O)[C@@H](OC(C)=O)C[C@]4([H])[C@@H]([C@]5([H])OC(C(C)=C(C)C5)=O)C)=CC=C1	InChI=1S/C30H40O7/c1-15-12-24(37-27(34)16(15)2)17(3)21-14-26(36-18(4)31)30(35)22-13-23(32)20-8-7-9-25(33)29(20,6)19(22)10-11-28(21,30)5/h7-9,17,19,21-24,26,32,35H,10-14H2,1-6H3/t17-,19-,21+,22+,23+,24+,26?,28+,29+,30+/m0/s1	DDEJGECZXMOOLV-XLLXXQLNSA-N	Physalis angulata L.	2018	10.1016/j.phytol.2018.07.029	115	physagulin P
306	Daturmetelide C	C28H38O7	486.262	486.605	[H][C@]12[C@@]([C@]([H])([C@H](O)C[C@]3([H])[C@@H](C4OC(C(CO)=C(C)C4)=O)C)[C@]3(C)CC2)([H])[C@H](O)[C@@H](O)C([C@]51C)=CC=CC5=O	InChI=1S/C28H38O7/c1-13-10-20(35-26(34)15(13)12-29)14(2)18-11-19(30)23-22-16(8-9-27(18,23)3)28(4)17(24(32)25(22)33)6-5-7-21(28)31/h5-7,14,16,18-20,22-25,29-30,32-33H,8-12H2,1-4H3/t14-,16-,18+,19+,20?,22+,23-,24-,25-,27+,28+/m0/s1	JNKRHTAJDXCPJQ-XXCKKGGCSA-N	Datura metel L.	2020	10.1016/j.bioorg.2019.103541	82
307	Daturmetelide D	C28H38O7	486.262	486.605	[H][C@]12[C@@]([C@]([H])(CC[C@]3([H])[C@@H](C4OC(C(CO)=C(C)C4)=O)C)[C@]3(C)[C@H](O)C2)([H])[C@H](O)[C@@H](O)C([C@]51C)=CC=CC5=O	InChI=1S/C28H38O7/c1-13-10-20(35-26(34)15(13)12-29)14(2)16-8-9-17-23-19(11-22(31)27(16,17)3)28(4)18(24(32)25(23)33)6-5-7-21(28)30/h5-7,14,16-17,19-20,22-25,29,31-33H,8-12H2,1-4H3/t14-,16+,17-,19-,20?,22+,23-,24-,25-,27+,28-/m0/s1	ZCODUFGEXBVRHK-NESOXSSGSA-N	Datura metel L.	2020	10.1016/j.bioorg.2019.103541	82
308	Daturafoliside S and Daturafoliside W	C28H38O6	470.267	470.606	O=C1[C@@]2(C)C([C@@H](O)[C@@H](O)[C@]3([H])[C@]2([H])CC[C@@]4(C)[C@@]3([H])CC[C@]4([H])[C@@H]([C@]5([H])OC(C(CO)=C(C)C5)=O)C)=CC=C1	InChI=1S/C28H38O6/c1-14-12-21(34-26(33)16(14)13-29)15(2)17-8-9-18-23-19(10-11-27(17,18)3)28(4)20(24(31)25(23)32)6-5-7-22(28)30/h5-7,15,17-19,21,23-25,29,31-32H,8-13H2,1-4H3/t15-,17+,18-,19-,21+,23-,24+,25-,27+,28+/m0/s1	CPQYATLXRZJRFT-ISQHKRTNSA-N	Datura metel L.	2017 and 2018	10.1016/j.phytochem.2018.08.005 and 10.1177/1934578X1701200705	88, 90
309	Daturanolide C	C28H38O5	454.272	454.607	[H][C@]12[C@@]([C@]([H])(CC[C@]3([H])[C@@H](C4OC(C(C)=C(C)C4)=O)CO)[C@]3(C)CC2)([H])C[C@@H](O)C([C@]51C)=CC=CC5=O	InChI=1S/C28H38O5/c1-15-12-24(33-26(32)16(15)2)18(14-29)20-9-8-19-17-13-23(30)22-6-5-7-25(31)28(22,4)21(17)10-11-27(19,20)3/h5-7,17-21,23-24,29-30H,8-14H2,1-4H3/t17-,18-,19-,20+,21-,23+,24?,27-,28+/m0/s1	RGKCKWOMVSGUES-PWQOEEKGSA-N	Datura metel L.	2019	10.1002/cbdv.201900004	114
310	Baimantuoluoline U	C30H42O6	498.298	498.66	O=C1[C@@]2(C)C([C@H](O)C[C@]3([H])[C@]2([H])CC[C@@]4(C)[C@@]3([H])CC[C@]4([H])[C@H](CO)[C@]5([H])OC(C(COCC)=C(C)C5)=O)=CC=C1	InChI=1S/C30H42O6/c1-5-35-16-20-17(2)13-26(36-28(20)34)19(15-31)22-10-9-21-18-14-25(32)24-7-6-8-27(33)30(24,4)23(18)11-12-29(21,22)3/h6-8,18-19,21-23,25-26,31-32H,5,9-16H2,1-4H3/t18-,19-,21-,22+,23-,25+,26+,29-,30+/m0/s1	YFFDOPGIIKFOJW-LPNNLYNCSA-N	Datura metel L.	2020	10.1016/j.fitote.2019.104468	89
311	Daturanolide B	C28H40O5	456.288	456.623	[H][C@]12[C@@]([C@]([H])(CC[C@]3([H])[C@@H](C4OC(C(C)=C(C)C4)=O)CO)[C@]3(C)CC2)([H])C[C@@H](O)C([C@]51C)=CCCC5=O	InChI=1S/C28H40O5/c1-15-12-24(33-26(32)16(15)2)18(14-29)20-9-8-19-17-13-23(30)22-6-5-7-25(31)28(22,4)21(17)10-11-27(19,20)3/h6,17-21,23-24,29-30H,5,7-14H2,1-4H3/t17-,18-,19-,20+,21-,23+,24?,27-,28+/m0/s1	REABCPRBXDMWCC-PWQOEEKGSA-N	Datura metel L.	2019	10.1002/cbdv.201900004	114
312	Daturanolide A	C28H38O6	470.267	470.606	[H][C@]12[C@@]([C@]([H])(CC[C@]3([H])[C@@H](C4OC(C(C)=C(C)C4)=O)CO)[C@]3(C)CC2)([H])CC([C@@]([C@]51C)(O)CC=CC5=O)=O	InChI=1S/C28H38O6/c1-15-12-22(34-25(32)16(15)2)18(14-29)20-8-7-19-17-13-24(31)28(33)10-5-6-23(30)27(28,4)21(17)9-11-26(19,20)3/h5-6,17-22,29,33H,7-14H2,1-4H3/t17-,18-,19-,20+,21-,22?,26-,27-,28-/m0/s1	ZJUCIIFYRKYHHW-RPOJHCGKSA-N	Datura metel L.	2019	10.1002/cbdv.201900004	114
313	Daturmetelide J	C28H38O7	486.262	486.605	[H][C@]12[C@@]([C@]([H])([C@H](O)C[C@]3([H])[C@@H]([C@]4([H])OC(C(CO)=C(C)C4)=O)C)[C@]3(C)C[C@H]2O)([H])C=C[C@@]([C@]51C)(O)CC=CC5=O	InChI=1S/C28H38O7/c1-14-10-21(35-25(33)17(14)13-29)15(2)18-11-19(30)23-16-7-9-28(34)8-5-6-22(32)27(28,4)24(16)20(31)12-26(18,23)3/h5-7,9,15-16,18-21,23-24,29-31,34H,8,10-13H2,1-4H3/t15-,16-,18+,19+,20+,21+,23+,24+,26+,27+,28-/m0/s1	LZERSAWDZYHPPV-GUKFHZCPSA-N	Datura metel L.	2020	10.1016/j.bioorg.2019.103541	82
314	Withasomniferolide A	C28H36O4	436.261	436.592	[H][C@]12[C@@]([C@]([H])(CC[C@]3([H])[C@@H]([C@]4([H])OC(C(CO)=C(C)C4)=O)C)[C@]3(C)CC2)([H])C=CC([C@]51C)=CC=CC5=O	InChI=1S/C28H36O4/c1-16-14-24(32-26(31)20(16)15-29)17(2)21-10-11-22-19-9-8-18-6-5-7-25(30)28(18,4)23(19)12-13-27(21,22)3/h5-9,17,19,21-24,29H,10-15H2,1-4H3/t17-,19-,21+,22-,23-,24+,27+,28-/m0/s1	JRBQPTFYQRGHFB-IUNRESPKSA-N	Withania somnifera	2019	10.1021/acs.jnatprod.8b01023	113
315	Withasomniferolide B	C28H36O4	436.261	436.592	[H][C@]12[C@@]([C@]([H])(CC[C@]3([H])[C@]([C@]4([H])OC(C(C)=C(C)C4)=O)(O)C)[C@]3(C)CC2)([H])C=CC([C@]51C)=CC=CC5=O	InChI=1S/C28H36O4/c1-16-15-24(32-25(30)17(16)2)28(5,31)22-12-11-20-19-10-9-18-7-6-8-23(29)27(18,4)21(19)13-14-26(20,22)3/h6-10,19-22,24,31H,11-15H2,1-5H3/t19-,20-,21-,22-,24+,26-,27-,28+/m0/s1	IVEUAUDBLGDYAW-ZJOYFJNASA-N	Withania somnifera	2019	10.1021/acs.jnatprod.8b01023	113
316	Daturmetelide H	C28H36O4	436.261	436.592	[H][C@]12[C@@]([C@@]([H])(CC[C@]3([H])[C@@H](C4OC(C(CO)=C(C)C4)=O)C)[C@]3(C)CC2)([H])C=CC([C@]51C)=CC=CC5=O	InChI=1S/C28H36O4/c1-16-14-24(32-26(31)20(16)15-29)17(2)21-10-11-22-19-9-8-18-6-5-7-25(30)28(18,4)23(19)12-13-27(21,22)3/h5-9,17,19,21-24,29H,10-15H2,1-4H3/t17-,19-,21+,22+,23-,24?,27+,28-/m0/s1	JRBQPTFYQRGHFB-BHENMCHTSA-N	Datura metel L.	2020	10.1016/j.bioorg.2019.103541	82
317	Physapubescin J	C32H48O10S	624.297	624.786	O=C1[C@@]2(C)[C@@]([C@@H]3C[C@]4([H])[C@]2([H])CC[C@@]5(C)[C@@]4([H])[C@@H](OC(C)=O)C[C@]5([H])[C@@H]([C@]6([H])OC(O)[C@@](C)(O)[C@](C)(O)C6)C)(O)[C@@H](O[C@H](O)CS3)C=C1	InChI=1S/C32H48O10S/c1-15(21-13-29(4,37)31(6,38)27(36)41-21)19-12-20(40-16(2)33)26-17-11-24-32(39)23(42-25(35)14-43-24)8-7-22(34)30(32,5)18(17)9-10-28(19,26)3/h7-8,15,17-21,23-27,35-39H,9-14H2,1-6H3/t15-,17+,18-,19+,20?,21+,23-,24-,25-,26+,27?,28+,29+,30-,31+,32+/m0/s1	MQPQQZXCLOPRFQ-UDNJMNPKSA-N	Physalis pubescens L.	2020	10.1016/j.fitote.2020.104692	51
318	3,4-Dihydro-5α,6β,27-trihydroxywithacoagulin E	C28H42O8	506.288	506.636	O=C1[C@@]2(C)[C@]([C@H](O)C[C@]3([H])[C@]2([H])CC[C@@]4(C)[C@]3(O)CC[C@]4([H])[C@@]([C@]5([H])OC(C(CO)=C(C)C5)=O)(C)O)(O)CCC1	InChI=1S/C28H42O8/c1-15-12-22(36-23(32)16(15)14-29)26(4,33)19-8-11-27(34)18-13-21(31)28(35)9-5-6-20(30)25(28,3)17(18)7-10-24(19,27)2/h17-19,21-22,29,31,33-35H,5-14H2,1-4H3/t17-,18+,19-,21+,22+,24+,25-,26+,27-,28-/m0/s1	AYSGOPOJGPEGSU-OQJFGUSLSA-N	Physalis peruviana	1998, 1999, 2016	10.1021/acs.jnatprod.5b00648	62	coagulin M and 2,3-dihydro-5α,6β-dihydroxywithanolide H
319	CR-591	C31H45NO8S	591.287	591.76	[H][C@]12[C@@]([C@]([H])(CC[C@]3([H])[C@@H](C4OC(C(CO)=C(C)C4)=O)C)[C@]3(C)CC2)([H])C[C@H](SC[C@H](N)C(O)=O)[C@]([C@]51C)(O)[C@@H](O)C=CC5=O	InChI=1S/C31H45NO8S/c1-15-11-23(40-28(38)18(15)13-33)16(2)19-5-6-20-17-12-26(41-14-22(32)27(36)37)31(39)25(35)8-7-24(34)30(31,4)21(17)9-10-29(19,20)3/h7-8,16-17,19-23,25-26,33,35,39H,5-6,9-14,32H2,1-4H3,(H,36,37)/t16-,17-,19+,20-,21-,22-,23?,25-,26-,29+,30-,31+/m0/s1	JLJKDVDBMMAMMV-XHHBACGUSA-N	Bioconversion	2019	10.3390/molecules24244599	117
320	CR-777	C38H55N3O12S	777.351	777.927	[H][C@]12[C@@]([C@]([H])(CC[C@]3([H])[C@@H](C4OC(C(CO)=C(C)C4)=O)C)[C@]3(C)CC2)([H])C[C@H](SC[C@@H](C(NCC(O)=O)=O)NC(CC[C@@H](N)C(O)=O)=O)[C@]([C@]51C)(O)[C@@H](O)C=CC5=O	InChI=1S/C38H55N3O12S/c1-18-13-27(53-35(51)21(18)16-42)19(2)22-5-6-23-20-14-30(38(52)29(44)9-8-28(43)37(38,4)24(20)11-12-36(22,23)3)54-17-26(33(48)40-15-32(46)47)41-31(45)10-7-25(39)34(49)50/h8-9,19-20,22-27,29-30,42,44,52H,5-7,10-17,39H2,1-4H3,(H,40,48)(H,41,45)(H,46,47)(H,49,50)/t19-,20-,22+,23-,24-,25+,26-,27?,29-,30-,36+,37-,38+/m0/s1	IWQLIYYFCZHCEP-NBCCUVRGSA-N	Bioconversion	2019	10.3390/molecules24244599	117
321	Baimantuoluoside H1	C34H46O9	598.314	598.733	O=C1[C@@]2(C)C(C=C[C@]3([H])[C@]2([H])CC[C@@]4(C)[C@@]3(CC[C@]4([H])[C@H](C)[C@]5([H])OC(C(CO[C@@]([H])([C@](O)6[H])O[C@]([H])(CO)[C@@]([H])(O)[C@@]6(O)[H])=C(C)C5)=O)[H])=CC=C1	InChI=1S/C34H46O9/c1-17-14-25(42-31(40)21(17)16-41-32-30(39)29(38)28(37)26(15-35)43-32)18(2)22-10-11-23-20-9-8-19-6-5-7-27(36)34(19,4)24(20)12-13-33(22,23)3/h5-9,18,20,22-26,28-30,32,35,37-39H,10-16H2,1-4H3/t18-,20-,22+,23+,24-,25+,26+,28+,29-,30+,32+,33+,34-/m0/s1	FRPYXURUKGDIHX-QJTYJWGKSA-N	Datura metel L.	2014	10.1016/j.phytol.2014.02.008	118	Baimantuoluoside H
322	Baimantuoluoside D	C34H50O12	650.33	650.762	O=C1[C@@]2(C)[C@]([C@@H](O)[C@H](O)[C@]3([H])[C@]2([H])CC[C@@]4(C)[C@@]3([H])CC[C@]4([H])[C@@H]([C@]5([H])OC(C(CO[C@@]([H])([C@](O)6[H])O[C@]([H])(CO)[C@@]([H])(O)[C@@]6(O)[H])=C(C)C5)=O)C)(O)CC=C1	InChI=1S/C34H50O12/c1-15-12-21(45-30(42)17(15)14-44-31-28(40)27(39)25(37)22(13-35)46-31)16(2)18-7-8-19-24-20(9-11-32(18,19)3)33(4)23(36)6-5-10-34(33,43)29(41)26(24)38/h5-6,16,18-22,24-29,31,35,37-41,43H,7-14H2,1-4H3/t16-,18+,19-,20-,21+,22+,24-,25+,26+,27-,28+,29-,31+,32+,33-,34-/m0/s1	USYWQXFGJBNLAB-HTVPWXHESA-N	Datura metel L.	2010	10.1007/s12272-010-0802-4	119
323	Baimantuoluoside E	C34H50O12	650.33	650.762	O=C1[C@@]2(C)[C@]([C@H](O)[C@@H](O)[C@]3([H])[C@]2([H])CC[C@@]4(C)[C@@]3([H])CC[C@]4([H])[C@@H]([C@]5([H])OC(C(CO[C@@]([H])([C@](O)6[H])O[C@]([H])(CO)[C@@]([H])(O)[C@@]6(O)[H])=C(C)C5)=O)C)(O)CC=C1	InChI=1S/C34H50O12/c1-15-12-21(45-30(42)17(15)14-44-31-28(40)27(39)25(37)22(13-35)46-31)16(2)18-7-8-19-24-20(9-11-32(18,19)3)33(4)23(36)6-5-10-34(33,43)29(41)26(24)38/h5-6,16,18-22,24-29,31,35,37-41,43H,7-14H2,1-4H3/t16-,18+,19-,20-,21+,22+,24-,25+,26-,27-,28+,29+,31+,32+,33-,34-/m0/s1	USYWQXFGJBNLAB-DAHWTJIMSA-N	Datura metel L.	2010	10.1007/s12272-010-0802-4	119
324	Baimantuoluoside F	C34H50O13	666.325	666.761	O=C1[C@@]2(C)[C@]([C@H](O)[C@@H](O)[C@]3([H])[C@]2([H])CC(O)[C@@]4(C)[C@@]3([H])CC[C@]4([H])[C@@H]([C@]5([H])OC(C(CO[C@@]([H])([C@](O)6[H])O[C@]([H])(CO)[C@@]([H])(O)[C@@]6(O)[H])=C(C)C5)=O)C)(O)CC=C1	InChI=1S/C34H50O13/c1-14-10-20(46-30(43)16(14)13-45-31-28(41)27(40)25(38)21(12-35)47-31)15(2)17-7-8-18-24-19(11-23(37)32(17,18)3)33(4)22(36)6-5-9-34(33,44)29(42)26(24)39/h5-6,15,17-21,23-29,31,35,37-42,44H,7-13H2,1-4H3/t15-,17+,18-,19-,20+,21+,23?,24-,25+,26-,27-,28+,29+,31+,32+,33-,34-/m0/s1	YEPLVRJAOSNDLN-OSTXUHRFSA-N	Datura metel L.	2010	10.1007/s12272-010-0802-4	119
325	Baimantuoluoside G	C34H50O11	634.335	634.763	O=C1[C@@]2(C)[C@]([C@H](O)C[C@]3([H])[C@]2([H])CC[C@@]4(C)[C@@]3([H])CC[C@]4([H])[C@@H]([C@]5([H])OC(C(CO[C@@]([H])([C@](O)6[H])O[C@]([H])(CO)[C@@]([H])(O)[C@@]6(O)[H])=C(C)C5)=O)C)(O)CC=C1	InChI=1S/C34H50O11/c1-16-12-23(44-30(41)19(16)15-43-31-29(40)28(39)27(38)24(14-35)45-31)17(2)20-7-8-21-18-13-26(37)34(42)10-5-6-25(36)33(34,4)22(18)9-11-32(20,21)3/h5-6,17-18,20-24,26-29,31,35,37-40,42H,7-15H2,1-4H3/t17-,18-,20+,21-,22-,23+,24+,26+,27+,28-,29+,31+,32+,33-,34-/m0/s1	CRMSZGGPXAEQGS-PTWZPFBZSA-N	Datura metel L.	2010	10.1007/s12272-010-0802-4	119
326	Baimantuoluoside H	C34H50O12	650.33	650.762	O=C1[C@@]2(C)[C@@]([C@@H](O)C[C@]3([H])[C@]2([H])C[C@@H](O)[C@@]4(C)[C@@]3([H])CC[C@]4([H])[C@@H]([C@]5([H])OC(C(CO[C@@]([H])([C@](O)6[H])O[C@]([H])(CO)[C@@]([H])(O)[C@@]6(O)[H])=C(C)C5)=O)C)(O)CC=C1	InChI=1S/C34H50O12/c1-15-10-22(45-30(42)18(15)14-44-31-29(41)28(40)27(39)23(13-35)46-31)16(2)19-7-8-20-17-11-26(38)34(43)9-5-6-24(36)33(34,4)21(17)12-25(37)32(19,20)3/h5-6,16-17,19-23,25-29,31,35,37-41,43H,7-14H2,1-4H3/t16-,17-,19+,20-,21-,22+,23+,25+,26-,27+,28-,29+,31+,32+,33-,34+/m0/s1	PHTAMKAWULWOCS-RGHZRREDSA-N	Datura metel L.	2011	10.3390/molecules16075833	154
327	Daturmetelide S	C34H48O10	616.325	616.748	[H][C@]12[C@@]([C@]([H])(CC[C@]3([H])[C@@H]([C@]4([H])OC(C(CO[C@@]([H])([C@](O)5[H])O[C@]([H])(CO)[C@@]([H])(O)[C@@]5(O)[H])=C(C)C4)=O)C)[C@]3(C)CC2)([H])C=C[C@@]([C@]61C)(O)CC=CC6=O	InChI=1S/C34H48O10/c1-17-14-24(43-30(40)20(17)16-42-31-29(39)28(38)27(37)25(15-35)44-31)18(2)21-7-8-22-19-9-13-34(41)11-5-6-26(36)33(34,4)23(19)10-12-32(21,22)3/h5-6,9,13,18-19,21-25,27-29,31,35,37-39,41H,7-8,10-12,14-16H2,1-4H3/t18-,19-,21+,22-,23-,24+,25+,27+,28-,29+,31+,32+,33-,34-/m0/s1	FSCLJLGZSSXQMK-VDENXRQJSA-N	Datura metel L.	2020	10.1016/j.bioorg.2019.103541	82
328	Daturmetelide V	C34H50O12	650.33	650.762	[H][C@]12[C@@]([C@]([H])(CC[C@]3([H])[C@@H]([C@]4([H])OC(C(CO[C@@]([H])([C@](O)5[H])O[C@]([H])(CO)[C@@]([H])(O)[C@@]5(O)[H])=C(C)C4)=O)C)[C@]3(C)CC2)([H])[C@H](O)[C@@H](O)C([C@]61C)=C[C@@H](O)CC6=O	InChI=1S/C34H50O12/c1-14-9-22(45-31(43)17(14)13-44-32-30(42)29(41)27(39)23(12-35)46-32)15(2)18-5-6-19-25-20(7-8-33(18,19)3)34(4)21(26(38)28(25)40)10-16(36)11-24(34)37/h10,15-16,18-20,22-23,25-30,32,35-36,38-42H,5-9,11-13H2,1-4H3/t15-,16+,18+,19-,20-,22+,23+,25-,26-,27+,28-,29-,30+,32+,33+,34+/m0/s1	FYDPAEJCQJLUMQ-ZOPZACJUSA-N	Datura metel L.	2020	10.1016/j.bioorg.2019.103541	82
329	Daturmetelide W	C34H50O12	650.33	650.762	[H][C@]12[C@@]([C@]([H])(CC[C@]3([H])[C@@H]([C@]4([H])OC(C(CO[C@@]([H])([C@](O)5[H])O[C@]([H])(CO)[C@@]([H])(O)[C@@]5(O)[H])=C(C)C4)=O)C)[C@]3(C)CC2)([H])[C@H](O)[C@@H](O)C([C@]61C)=C[C@H](O)CC6=O	InChI=1S/C34H50O12/c1-14-9-22(45-31(43)17(14)13-44-32-30(42)29(41)27(39)23(12-35)46-32)15(2)18-5-6-19-25-20(7-8-33(18,19)3)34(4)21(26(38)28(25)40)10-16(36)11-24(34)37/h10,15-16,18-20,22-23,25-30,32,35-36,38-42H,5-9,11-13H2,1-4H3/t15-,16-,18+,19-,20-,22+,23+,25-,26-,27+,28-,29-,30+,32+,33+,34+/m0/s1	FYDPAEJCQJLUMQ-QYXDAWINSA-N	Datura metel L.	2020	10.1016/j.bioorg.2019.103541	82
330	Daturmetelide T	C34H48O10	616.325	616.748	[H][C@]12[C@@]([C@]([H])(CC[C@]3([H])[C@@H]([C@]4([H])OC(C(CO[C@@]([H])([C@](O)5[H])O[C@]([H])(CO)[C@@]([H])(O)[C@@]5(O)[H])=C(C)C4)=O)C)[C@]3(C)CC2)([H])C=CC([C@]61C)=C[C@@H](O)CC6=O	InChI=1S/C34H48O10/c1-16-11-25(43-31(41)21(16)15-42-32-30(40)29(39)28(38)26(14-35)44-32)17(2)22-7-8-23-20-6-5-18-12-19(36)13-27(37)34(18,4)24(20)9-10-33(22,23)3/h5-6,12,17,19-20,22-26,28-30,32,35-36,38-40H,7-11,13-15H2,1-4H3/t17-,19+,20-,22+,23-,24-,25+,26+,28+,29-,30+,32+,33+,34-/m0/s1	ZRTYXTXLYQSJJZ-XYLPFXPVSA-N	Datura metel L.	2020	10.1016/j.bioorg.2019.103541	82
331	Daturmetelide U	C34H48O10	616.325	616.748	[H][C@]12[C@@]([C@]([H])(CC[C@]3([H])[C@@H]([C@]4([H])OC(C(CO[C@@]([H])([C@](O)5[H])O[C@]([H])(CO)[C@@]([H])(O)[C@@]5(O)[H])=C(C)C4)=O)C)[C@]3(C)CC2)([H])C=CC([C@]61C)=C[C@H](O)CC6=O	InChI=1S/C34H48O10/c1-16-11-25(43-31(41)21(16)15-42-32-30(40)29(39)28(38)26(14-35)44-32)17(2)22-7-8-23-20-6-5-18-12-19(36)13-27(37)34(18,4)24(20)9-10-33(22,23)3/h5-6,12,17,19-20,22-26,28-30,32,35-36,38-40H,7-11,13-15H2,1-4H3/t17-,19-,20-,22+,23-,24-,25+,26+,28+,29-,30+,32+,33+,34-/m0/s1	ZRTYXTXLYQSJJZ-LUKFAPDQSA-N	Datura metel L.	2020	10.1016/j.bioorg.2019.103541	82
332	Daturafoliside M	C34H48O12	648.315	648.746	O=C1[C@@]2(C)[C@]([C@@H](O)[C@@H](O)[C@]3([H])[C@]2([H])CC[C@@]4(C)[C@@]3([H])CC[C@]4([H])[C@@H]([C@]5([H])OC(C(CO[C@@]([H])([C@](O)6[H])O[C@]([H])(CO)[C@@]([H])(O)[C@@]6(O)[H])=C(C)C5)=O)C)(O7)[C@H]7C=C1	InChI=1S/C34H48O12/c1-14-11-20(44-30(42)16(14)13-43-31-28(40)27(39)25(37)21(12-35)45-31)15(2)17-5-6-18-24-19(9-10-32(17,18)3)33(4)22(36)7-8-23-34(33,46-23)29(41)26(24)38/h7-8,15,17-21,23-29,31,35,37-41H,5-6,9-13H2,1-4H3/t15-,17+,18-,19-,20+,21+,23+,24-,25+,26-,27-,28+,29-,31+,32+,33-,34-/m0/s1	ALSIBMCKRZTFFJ-QNSUATHGSA-N	Datura metel L.	2018	10.1016/j.phytochem.2018.08.005	88
333	Daturafoliside R	C35H50O10	630.34	630.775	O=C1[C@@]2(C)C(C=C[C@]3([H])[C@]2([H])CC[C@@]4(C)[C@@]3([H])CC[C@]4([H])[C@@H]([C@]5([H])OC(C(CO[C@@]([H])([C@](O)6[H])O[C@]([H])(CO)[C@@]([H])(O)[C@@]6(O)[H])=C(C)C5)=O)C)=C[C@@H](OC)C1	InChI=1S/C35H50O10/c1-17-12-26(44-32(41)22(17)16-43-33-31(40)30(39)29(38)27(15-36)45-33)18(2)23-8-9-24-21-7-6-19-13-20(42-5)14-28(37)35(19,4)25(21)10-11-34(23,24)3/h6-7,13,18,20-21,23-27,29-31,33,36,38-40H,8-12,14-16H2,1-5H3/t18-,20?,21-,23+,24-,25-,26+,27+,29+,30-,31+,33+,34+,35-/m0/s1	CMNQNTYTLAHWAI-SFPQJNLQSA-N	Datura metel L.	2018	10.1016/j.phytochem.2018.08.005	88
334	Daturmetelide O	C34H50O10	618.34	618.764	[H][C@]12[C@@]([C@]([H])(CC[C@]3([H])[C@@H]([C@]4([H])OC(C(CO)=C(C)C4)=O)C)[C@]3(C)CC2)([H])C=CC5=C[C@@H](O[C@@]([H])([C@](O)6[H])O[C@]([H])(CO)[C@@]([H])(O)[C@@]6(O)[H])C[C@H](O)[C@@]51C	InChI=1S/C34H50O10/c1-16-11-25(43-31(41)21(16)14-35)17(2)22-7-8-23-20-6-5-18-12-19(42-32-30(40)29(39)28(38)26(15-36)44-32)13-27(37)34(18,4)24(20)9-10-33(22,23)3/h5-6,12,17,19-20,22-30,32,35-40H,7-11,13-15H2,1-4H3/t17-,19+,20-,22+,23-,24-,25+,26+,27-,28+,29-,30+,32+,33+,34-/m0/s1	IOWFTCRGXODJLP-MYBCZMNMSA-N	Datura metel L.	2020	10.1016/j.bioorg.2019.103541	82
335	Withaperuvin I	C29H42O9	534.283	534.646	O=C1[C@@]2(C)[C@]([C@H](O)CC3C2CC[C@@]4(C)[C@@]3(O)CC[C@@]4(O)[C@@](C)(O)[C@@H]5OC(C(C)=C(CO)C5)=O)(OC)CC=C1	InChI=1S/C29H42O9/c1-16-17(15-30)13-22(38-23(16)33)26(4,34)29(36)12-11-27(35)19-14-21(32)28(37-5)9-6-7-20(31)25(28,3)18(19)8-10-24(27,29)2/h6-7,18-19,21-22,30,32,34-36H,8-15H2,1-5H3/t18?,19?,21-,22-,24+,25+,26+,27-,28?,29+/m1/s1	DUEKRLFNPLMBQO-VVNSEUIVSA-N	Physalis peruviana	2012	10.1016/j.steroids.2011.09.011	64
336	Withaperuvin N	C28H40O9	520.267	520.619	O=C1[C@@]2(C)[C@]([C@H](O)[C@H](O)[C@]3([H])[C@]2([H])CC[C@@]4(C)[C@@]3(O)CC[C@@]4(O)[C@@](C)(O)[C@@H]5OC(C(C)=C(C)C5)=O)(O)CC=C1	InChI=1S/C28H40O9/c1-14-13-18(37-22(32)15(14)2)25(5,33)28(36)12-11-26(34)19-16(8-10-23(26,28)3)24(4)17(29)7-6-9-27(24,35)21(31)20(19)30/h6-7,16,18-21,30-31,33-36H,8-13H2,1-5H3/t16-,18+,19-,20+,21+,23-,24-,25-,26+,27-,28-/m0/s1	VOZPRTXDIGMFRS-LUHJULTDSA-N	Physalis peruviana	2012	10.1016/j.steroids.2011.09.011	64
337	6,7-Diacetae withaperuvin N	C32H44O11	604.288	604.693	O=C1[C@@]2(C)[C@]([C@H](OC(C)=O)[C@H](OC(C)=O)[C@]3([H])[C@]2([H])CC[C@@]4(C)[C@@]3(O)CC[C@@]4(O)[C@@](C)(O)[C@@H]5OC(C(C)=C(C)C5)=O)(O)CC=C1	InChI=1S/C32H44O11/c1-16-15-22(43-26(36)17(16)2)29(7,37)32(40)14-13-30(38)23-20(10-12-27(30,32)5)28(6)21(35)9-8-11-31(28,39)25(42-19(4)34)24(23)41-18(3)33/h8-9,20,22-25,37-40H,10-15H2,1-7H3/t20-,22+,23-,24?,25?,27-,28-,29-,30+,31-,32-/m0/s1	VXJBSRZAUGXGPF-WWPVNMLASA-N	Acetylation of Withaperuvin N	2012	10.1016/j.steroids.2011.09.011	64
338	Physagulin P	C30H42O10	562.278	562.656	O=C1[C@@]2(C)[C@]([C@H](O)C[C@]3([H])[C@]2([H])CC[C@@]4(C)[C@@]3(O)[C@@H](OC(C)=O)[C@@H](O)[C@@]4(O)[C@H](C)[C@@H]5OC(C(C)=C(C)C5)=O)(O)CC=C1	InChI=1S/C30H42O10/c1-14-12-20(40-25(35)15(14)2)16(3)29(37)23(34)24(39-17(4)31)30(38)19-13-22(33)28(36)10-7-8-21(32)27(28,6)18(19)9-11-26(29,30)5/h7-8,16,18-20,22-24,33-34,36-38H,9-13H2,1-6H3/t16-,18+,19-,20-,22-,23-,24?,26-,27+,28+,29+,30+/m1/s1	BCJKEUSQPAFAPU-YGGPHMLBSA-N	Physalis angulata L. var. villosa Bonati (PA)	2014	10.1016/j.steroids.2014.04.015	116
339	14-Epi-physagulin P	C30H42O10	562.278	562.656	O=C1[C@@]2(C)[C@]([C@H](O)C[C@]3([H])[C@]2([H])CC[C@@]4(C)[C@]3(O)[C@@H](OC(C)=O)[C@@H](O)[C@@]4(O)[C@H](C)[C@@H]5OC(C(C)=C(C)C5)=O)(O)CC=C1	InChI=1S/C30H42O10/c1-14-12-20(40-25(35)15(14)2)16(3)29(37)23(34)24(39-17(4)31)30(38)19-13-22(33)28(36)10-7-8-21(32)27(28,6)18(19)9-11-26(29,30)5/h7-8,16,18-20,22-24,33-34,36-38H,9-13H2,1-6H3/t16-,18+,19-,20-,22-,23-,24?,26-,27+,28+,29+,30-/m1/s1	BCJKEUSQPAFAPU-BWABRCJFSA-N	Physalis angulata L. var. villosa Bonati (PA)	2014	10.1016/j.steroids.2014.04.015	116
340	Physaperuvin G，withanolide S	C28H40O8	504.272	504.62	O=C1[C@@]2(C)[C@]([C@H](O)C[C@]3([H])[C@]2([H])CC[C@@]4(C)[C@@]3(O)CC[C@@]4(O)[C@@]([C@]5([H])OC(C(C)=C(C)C5)=O)(C)O)(O)CC=C1	InChI=1S/C28H40O8/c1-15-13-21(36-22(31)16(15)2)25(5,32)28(35)12-11-26(33)18-14-20(30)27(34)9-6-7-19(29)24(27,4)17(18)8-10-23(26,28)3/h6-7,17-18,20-21,30,32-35H,8-14H2,1-5H3/t17-,18+,20+,21+,23-,24-,25-,26+,27-,28-/m0/s1	PQZVBIJEPVKNOZ-PCLZMVHQSA-N	Physalis peruviana, Withania coagulans	2016	10.1016/j.bmcl.2016.04.077	68	coagulin I
341	Physaperuvin J	C28H42O9	522.283	522.635	O=C1[C@@]2(C)[C@]([C@@H](O)C[C@]3([H])[C@]2([H])CC[C@@]4(C)[C@@]3(O)[C@@H](O)C[C@@]4(O)[C@@]([C@]5([H])OC(C(C)=C(C)C5)=O)(C)O)(O)CCC1	InChI=1S/C28H42O9/c1-14-11-21(37-22(32)15(14)2)25(5,33)27(35)13-20(31)28(36)17-12-19(30)26(34)9-6-7-18(29)24(26,4)16(17)8-10-23(27,28)3/h16-17,19-21,30-31,33-36H,6-13H2,1-5H3/t16-,17+,19-,20-,21+,23+,24-,25-,26-,27-,28-/m0/s1	UDZLCLFVPFWFJB-NADVWXHNSA-N	Physalis peruviana	2016	10.1016/j.bmcl.2016.04.077	68
342	Physagulin Q1	C30H42O9	546.283	546.657	O=C1[C@@]2(C)[C@]([C@@H](O)C[C@]3([H])[C@]2([H])CC[C@@]4(C)[C@]3(O)[C@@H](OC(C)=O)C[C@@]4(O)[C@@H]([C@]5([H])OC(C(C)=C(C)C5)=O)C)(O)CC=C1	InChI=1S/C30H42O9/c1-15-12-21(39-25(34)16(15)2)17(3)29(36)14-24(38-18(4)31)30(37)20-13-23(33)28(35)10-7-8-22(32)27(28,6)19(20)9-11-26(29,30)5/h7-8,17,19-21,23-24,33,35-37H,9-14H2,1-6H3/t17-,19+,20-,21-,23+,24?,26-,27+,28+,29-,30-/m1/s1	URZHQDOZWJFQSH-DRUKJFJQSA-N	Physalis angulata L.	2018	10.1016/j.phytol.2018.07.029	115	physagulin Q
343	Physangulatin K	C31H44O9	560.298	560.684	O=C1[C@@]2(C)[C@]([C@H](O)C[C@]3([H])[C@]2([H])CC[C@@]4(C)[C@]3(O)[C@@H](OC(C)=O)C[C@@]4(O)[C@@H]([C@]5([H])OC(C(C)=C(C)C5)=O)C)(OC)CC=C1	InChI=1S/C31H44O9/c1-16-13-22(40-26(35)17(16)2)18(3)29(36)15-25(39-19(4)32)31(37)21-14-24(34)30(38-7)11-8-9-23(33)28(30,6)20(21)10-12-27(29,31)5/h8-9,18,20-22,24-25,34,36-37H,10-15H2,1-7H3/t18-,20+,21-,22-,24-,25?,27-,28+,29-,30?,31-/m1/s1	HNZNFQMCLRGZAF-OOJCDKFGSA-N	Physalis angulata L.	2016	10.1021/acs.jnatprod.6b00094	66
344	Physaminilide J	C28H40O8	504.272	504.62	O=C1[C@@]2(C)[C@]([C@H](O)C[C@]3([H])[C@]2([H])CC[C@@]4(C)[C@]3(O)[C@@H](O)C[C@@]4(O)[C@@H]([C@]5([H])OC(C(C)=C(C)C5)=O)C)(O)CC=C1	InChI=1S/C28H40O8/c1-14-11-19(36-23(32)15(14)2)16(3)27(34)13-22(31)28(35)18-12-21(30)26(33)9-6-7-20(29)25(26,5)17(18)8-10-24(27,28)4/h6-7,16-19,21-22,30-31,33-35H,8-13H2,1-5H3/t16-,17+,18-,19-,21-,22+,24-,25+,26+,27-,28-/m1/s1	MERIRODKTVDMJJ-IRRNODCPSA-N	Physalis minima	2020	10.1016/j.fitote.2020.104728	55
345	Tubocapsanolide D	C28H40O7	488.277	488.621	C[C@@]12[C@@]([C@@H](O)C[C@]3([H])[C@]2([H])CC[C@@]4(C)[C@@]3([H])CC[C@@]4(O)[C@@H]([C@]5([H])OC(C(C)=C(C)C5)=O)C)(O)[C@@H](O)C=CC1=O	InChI=1S/C28H40O7/c1-14-12-20(35-24(32)15(14)2)16(3)27(33)11-9-18-17-13-23(31)28(34)22(30)7-6-21(29)26(28,5)19(17)8-10-25(18,27)4/h6-7,16-20,22-23,30-31,33-34H,8-13H2,1-5H3/t16-,17+,18+,19+,20-,22+,23+,25+,26+,27-,28-/m1/s1	RGWWJKQOLUSAOK-MYCBUHJOSA-N	Withania coagulans	2016	10.1021/acs.jnatprod.5b00648	62	tubocapsanolide D
346	Physangulatin J	C31H42O9	558.283	558.668	O=C1[C@@]2(C)[C@]([C@H](O)C[C@]3([H])[C@]2([H])CC[C@@]4(C)[C@]3(O)[C@@H](OC(C)=O)[C@H](O5)[C@@]45[C@@H]([C@]6([H])OC(C(C)=C(C)C6)=O)C)(OC)CC=C1	InChI=1S/C31H42O9/c1-15-13-21(39-26(35)16(15)2)17(3)31-25(40-31)24(38-18(4)32)30(36)20-14-23(34)29(37-7)11-8-9-22(33)28(29,6)19(20)10-12-27(30,31)5/h8-9,17,19-21,23-25,34,36H,10-14H2,1-7H3/t17-,19+,20-,21-,23-,24?,25+,27+,28+,29?,30-,31+/m1/s1	BUKHJXCFPRJGQO-NNHBCCCLSA-N	Physalis angulata L.	2016	10.1021/acs.jnatprod.6b00094	66
347	Physangulatin L	C28H38O8	502.257	502.604	O=C1[C@@]2(C)[C@]([C@H](O)C[C@]3([H])[C@]2([H])CC[C@@]4(C)[C@]3(O)[C@@H](O)[C@H](O5)[C@@]45[C@@H]([C@]6([H])OC(C(C)=C(C)C6)=O)C)(O)CC=C1	InChI=1S/C28H38O8/c1-13-11-18(35-23(32)14(13)2)15(3)28-22(36-28)21(31)27(34)17-12-20(30)26(33)9-6-7-19(29)25(26,5)16(17)8-10-24(27,28)4/h6-7,15-18,20-22,30-31,33-34H,8-12H2,1-5H3/t15-,16+,17-,18-,20-,21+,22+,24+,25+,26+,27-,28+/m1/s1	NWTCHYUURAKPPW-ZNBXLQFASA-N	Physalis angulata L.	2016	10.1021/acs.jnatprod.6b00094	66
348	Physaminilide K	C30H40O10	560.262	560.64	O=C1[C@@]2(C)[C@]([C@H](O)C[C@]3([H])[C@]2([H])CC[C@@]4(C)[C@]3(O)[C@@H](OC(C)=O)[C@H]5[C@@]4(O5)[C@@H]([C@]6([H])OC(C(C)=C(C)C6)=O)C)(O)[C@@H](O)C=C1	InChI=1S/C30H40O10/c1-13-11-19(39-25(35)14(13)2)15(3)30-24(40-30)23(38-16(4)31)28(36)18-12-22(34)29(37)21(33)8-7-20(32)27(29,6)17(18)9-10-26(28,30)5/h7-8,15,17-19,21-24,33-34,36-37H,9-12H2,1-6H3/t15-,17+,18-,19-,21+,22-,23?,24+,26+,27+,28-,29+,30+/m1/s1	ABQYGSSMIBWCFE-RZWJNADASA-N	Physalis minima	2020	10.1016/j.fitote.2020.104728	55
349	Physagulin Q	C30H39ClO7	546.238	547.085	O=C1[C@@]2(C)[C@@]([C@@H](Cl)C[C@]3([H])[C@]2([H])CC[C@@]4(C)[C@@]3(O)[C@@H](OC(C)=O)C=C4[C@H](C)[C@@H]5OC(C(C)=C(C)C5)=O)(O)CC=C1	InChI=1S/C30H39ClO7/c1-15-12-22(38-26(34)16(15)2)17(3)20-14-25(37-18(4)32)30(36)21-13-23(31)29(35)10-7-8-24(33)28(29,6)19(21)9-11-27(20,30)5/h7-8,14,17,19,21-23,25,35-36H,9-13H2,1-6H3/t17-,19-,21+,22+,23-,25?,27+,28-,29+,30-/m0/s1	JNVGUFDMOXFBPI-JTHBPEBGSA-N	Physalis angulate	2014	10.1016/j.steroids.2014.04.015	116
350	Physagulide F	C28H38O7	486.262	486.605	O=C1[C@@]2(C)[C@]([C@H](O)C[C@]3([H])[C@]2([H])CC[C@@]4(C)[C@@]3(O)[C@@H](O)C=C4[C@@H]([C@]5([H])OC(C(C)=C(C)C5)=O)C)(O)CC=C1	InChI=1S/C28H38O7/c1-14-11-20(35-24(32)15(14)2)16(3)18-12-23(31)28(34)19-13-22(30)27(33)9-6-7-21(29)26(27,5)17(19)8-10-25(18,28)4/h6-7,12,16-17,19-20,22-23,30-31,33-34H,8-11,13H2,1-5H3/t16-,17-,19+,20+,22+,23-,25+,26-,27-,28-/m0/s1	NJZWKHAPQJMKGI-YYYUJKAHSA-N	Physalis angulate	2016	10.1039/c6ra08574a	67
351	Physagulide G	C30H40O8	528.272	528.642	O=C1[C@@]2(C)[C@]([C@@H](O)C[C@]3([H])[C@]2([H])CC[C@@]4(C)[C@@]3(O)[C@@H](OC(C)=O)C=C4[C@@H]([C@]5([H])OC(C(C)=C(C)C5)=O)C)(O)CC=C1	InChI=1S/C30H40O8/c1-15-12-22(38-26(34)16(15)2)17(3)20-14-25(37-18(4)31)30(36)21-13-24(33)29(35)10-7-8-23(32)28(29,6)19(21)9-11-27(20,30)5/h7-8,14,17,19,21-22,24-25,33,35-36H,9-13H2,1-6H3/t17-,19-,21+,22+,24-,25?,27+,28-,29-,30-/m0/s1	REOWXEUUAXLCRM-PMDBAQMJSA-N	Physalis angulate	2016	10.1039/c6ra08574a	67
352	Physagulide H	C30H39ClO8	562.233	563.084	O=C1[C@@]2(C)[C@@]([C@@H](Cl)C[C@]3([H])[C@]2([H])CC[C@@]4(C)[C@@]3(O)[C@@H](OC(C)=O)C=C4[C@@H]([C@]5([H])OC(C(C)=C(C)C5)=O)C)(O)[C@@H](O)C=C1	InChI=1S/C30H39ClO8/c1-14-11-21(39-26(35)15(14)2)16(3)19-13-25(38-17(4)32)29(36)20-12-22(31)30(37)24(34)8-7-23(33)28(30,6)18(20)9-10-27(19,29)5/h7-8,13,16,18,20-22,24-25,34,36-37H,9-12H2,1-6H3/t16-,18-,20+,21+,22-,24-,25?,27+,28-,29-,30-/m0/s1	FCGNLLKZCJWKFW-NVTAOQPKSA-N	Physalis angulate	2016	10.1039/c6ra08574a	67
353	Physaminilide G	C30H40O9	544.267	544.641	O=C1[C@@]2(C)[C@]([C@H](O)C[C@]3([H])[C@]2([H])CC[C@@]4(C)[C@@]3(O)[C@@H](OC(C)=O)C=C4[C@@H]([C@]5([H])OC(C(C)=C(CO)C5)=O)C)(O)CC=C1	InChI=1S/C30H40O9/c1-15-18(14-31)11-22(39-26(15)35)16(2)20-13-25(38-17(3)32)30(37)21-12-24(34)29(36)9-6-7-23(33)28(29,5)19(21)8-10-27(20,30)4/h6-7,13,16,19,21-22,24-25,31,34,36-37H,8-12,14H2,1-5H3/t16-,19-,21+,22+,24+,25?,27+,28-,29-,30-/m0/s1	MGYVGWDWQLRPKP-ZQJOWSIYSA-N	Physalis minima	2020	10.1039/d0ra04106h	56
354	Physangulatin A	C28H38O7	486.262	486.605	O=C1[C@@]2(C)[C@]([C@H](O)C[C@]3([H])[C@]2([H])CC[C@@]4(C)[C@]3(O)[C@@H](O)C=C4[C@@H]([C@]5([H])OC(C(C)=C(C)C5)=O)C)(O)CC=C1	InChI=1S/C28H38O7/c1-14-11-20(35-24(32)15(14)2)16(3)18-12-23(31)28(34)19-13-22(30)27(33)9-6-7-21(29)26(27,5)17(19)8-10-25(18,28)4/h6-7,12,16-17,19-20,22-23,30-31,33-34H,8-11,13H2,1-5H3/t16-,17-,19+,20+,22+,23-,25+,26-,27-,28+/m0/s1	NJZWKHAPQJMKGI-SIPBNNBESA-N	Physalis angulata L.	2016	10.1021/acs.jnatprod.6b00094	66
355	Physangulatin B	C28H38O7	486.262	486.605	O=C1[C@@]2(C)[C@]([C@H](O)C[C@]3([H])[C@]2([H])CC[C@@]4(C)[C@]3(O)[C@H](O)C=C4[C@@H]([C@]5([H])OC(C(C)=C(C)C5)=O)C)(O)CC=C1	InChI=1S/C28H38O7/c1-14-11-20(35-24(32)15(14)2)16(3)18-12-23(31)28(34)19-13-22(30)27(33)9-6-7-21(29)26(27,5)17(19)8-10-25(18,28)4/h6-7,12,16-17,19-20,22-23,30-31,33-34H,8-11,13H2,1-5H3/t16-,17-,19+,20+,22+,23+,25+,26-,27-,28+/m0/s1	NJZWKHAPQJMKGI-JTJCHTCWSA-N	Physalis angulata L.	2016	10.1021/acs.jnatprod.6b00094	66
356	Physangulatin C	C30H40O7	512.277	512.643	O=C1[C@@]2(C)[C@]([C@H](O)C[C@]3([H])[C@]2([H])CC[C@@]4(C)[C@@]3(O[C@H](C)O5)[C@@H]5C=C4[C@@H]([C@]6([H])OC(C(C)=C(C)C6)=O)C)(O)CC=C1	InChI=1S/C30H40O7/c1-15-12-22(36-26(33)16(15)2)17(3)20-14-25-30(37-18(4)35-25)21-13-24(32)29(34)10-7-8-23(31)28(29,6)19(21)9-11-27(20,30)5/h7-8,14,17-19,21-22,24-25,32,34H,9-13H2,1-6H3/t17-,18+,19-,21+,22+,24+,25-,27+,28-,29-,30-/m0/s1	XQTOJJCIRJJLKC-QZLGVUAXSA-N	Physalis angulata L.	2016	10.1021/acs.jnatprod.6b00094	66
357	Physangulatin D	C30H40O8	528.272	528.642	O=C1[C@@]2(C)[C@@]([C@@H](O)C[C@]3([H])[C@]2([H])CC[C@@]4(C)[C@]3(O)[C@@H](OC(C)=O)C=C4[C@@H]([C@]5([H])OC(C(C)=C(C)C5)=O)C)(O)CC=C1	InChI=1S/C30H40O8/c1-15-12-22(38-26(34)16(15)2)17(3)20-14-25(37-18(4)31)30(36)21-13-24(33)29(35)10-7-8-23(32)28(29,6)19(21)9-11-27(20,30)5/h7-8,14,17,19,21-22,24-25,33,35-36H,9-13H2,1-6H3/t17-,19-,21+,22+,24-,25?,27+,28-,29+,30+/m0/s1	REOWXEUUAXLCRM-XYJRILAISA-N	Physalis angulata L.	2016	10.1021/acs.jnatprod.6b00094	66
358	Physangulatin E	C29H40O7	500.277	500.632	O=C1[C@@]2(C)[C@]([C@H](O)C[C@]3([H])[C@]2([H])CC[C@@]4(C)[C@]3(O)[C@@H](OC)C=C4[C@@H]([C@]5([H])OC(C(C)=C(C)C5)=O)C)(O)CC=C1	InChI=1S/C29H40O7/c1-15-12-21(36-25(32)16(15)2)17(3)19-14-24(35-6)29(34)20-13-23(31)28(33)10-7-8-22(30)27(28,5)18(20)9-11-26(19,29)4/h7-8,14,17-18,20-21,23-24,31,33-34H,9-13H2,1-6H3/t17-,18-,20+,21+,23+,24?,26+,27-,28-,29+/m0/s1	UYJIBLRUKUGUHN-RUUDZNHQSA-N	Physalis angulata L.	2016	10.1021/acs.jnatprod.6b00094	66
359	Physangulatin F	C29H40O7	500.277	500.632	O=C1[C@@]2(C)[C@]([C@H](O)C[C@]3([H])[C@]2([H])CC[C@@]4(C)[C@]3(O)[C@H](OC)C=C4[C@@H]([C@]5([H])OC(C(C)=C(C)C5)=O)C)(O)CC=C1	InChI=1S/C29H40O7/c1-15-12-21(36-25(32)16(15)2)17(3)19-14-24(35-6)29(34)20-13-23(31)28(33)10-7-8-22(30)27(28,5)18(20)9-11-26(19,29)4/h7-8,14,17-18,20-21,23-24,31,33-34H,9-13H2,1-6H3/t17-,18-,20+,21+,23+,24?,26+,27-,28-,29+/m0/s1	UYJIBLRUKUGUHN-RUUDZNHQSA-N	Physalis angulata L.	2016	10.1021/acs.jnatprod.6b00094	66
360	Physangulatin G	C30H42O9	546.283	546.657	O=C1[C@@]2(C)[C@]([C@H](O)C[C@]3([H])[C@]2([H])CC[C@@]4(C)[C@]3(O)[C@@H](OC(C)=O)C=C4[C@@H]([C@]5([H])OC(C(C)=C(C)C5)=O)C)(O)C[C@@H](O)C1	InChI=1S/C30H42O9/c1-14-9-22(39-26(35)15(14)2)16(3)20-12-25(38-17(4)31)30(37)21-11-24(34)29(36)13-18(32)10-23(33)28(29,6)19(21)7-8-27(20,30)5/h12,16,18-19,21-22,24-25,32,34,36-37H,7-11,13H2,1-6H3/t16-,18-,19-,21+,22+,24+,25?,27+,28-,29-,30+/m0/s1	CNAPPICSWAUMDC-ZJSVPEGZSA-N	Physalis angulata L.	2016	10.1021/acs.jnatprod.6b00094	66
361	Physangulatin H	C31H42O8	542.288	542.669	O=C1[C@@]2(C)[C@]([C@H](O)C[C@]3([H])[C@]2([H])CC[C@@]4(C)[C@]3(O)[C@@H](OC(C)=O)C=C4[C@@H]([C@]5([H])OC(C(C)=C(C)C5)=O)C)(OC)CC=C1	InChI=1S/C31H42O8/c1-16-13-23(39-27(35)17(16)2)18(3)21-15-26(38-19(4)32)31(36)22-14-25(34)30(37-7)11-8-9-24(33)29(30,6)20(22)10-12-28(21,31)5/h8-9,15,18,20,22-23,25-26,34,36H,10-14H2,1-7H3/t18-,20-,22+,23+,25+,26?,28+,29-,30?,31+/m0/s1	IGNZQSFSTWCBIS-AKHSUTOQSA-N	Physalis angulata L.	2016	10.1021/acs.jnatprod.6b00094	66
362	Physaliolide C	C30H42O10	562.278	562.656	O=C1[C@@]2(C)[C@]([C@@H](O)C[C@]3([H])[C@]2([H])CC[C@@]4(C)[C@@]3(O)[C@@H](OC(C)=O)C=C4[C@@H]([C@]5([H])OC(C(C)=C(C)C5)=O)C)(O)[C@@H](O)[C@H](O)C1	InChI=1S/C30H42O10/c1-13-9-21(40-26(36)14(13)2)15(3)18-11-24(39-16(4)31)29(37)19-10-23(34)30(38)25(35)20(32)12-22(33)28(30,6)17(19)7-8-27(18,29)5/h11,15,17,19-21,23-25,32,34-35,37-38H,7-10,12H2,1-6H3/t15-,17-,19+,20+,21+,23-,24?,25-,27+,28-,29-,30+/m0/s1	NVSHRXYOQXGTFK-HTNDWBFQSA-N	Physalis minima	2018	10.1016/j.phytochem.2018.08.009	110
363	Physaliolide E	C30H40O9	544.267	544.641	O=C1[C@@]2(C)[C@]([C@H](O)C[C@]3([H])[C@]2([H])CC[C@@]4(C)[C@@]3(O)[C@@H](OC(C)=O)C=C4[C@@]([C@]5([H])OC(C(C)=C(C)C5)=O)(C)O)(O)CC=C1	InChI=1S/C30H40O9/c1-15-12-23(39-25(34)16(15)2)28(6,35)20-14-24(38-17(3)31)30(37)19-13-22(33)29(36)10-7-8-21(32)27(29,5)18(19)9-11-26(20,30)4/h7-8,14,18-19,22-24,33,35-37H,9-13H2,1-6H3/t18-,19+,22+,23+,24?,26+,27-,28+,29-,30-/m0/s1	OBALDRIQJIFKOD-IINOQTEOSA-N	Physalis minima	2018	10.1016/j.phytochem.2018.08.009	110
364	Physaliolide P	C28H36O7	484.246	484.589	C[C@@]12[C@]([C@H](O)C[C@]3([H])[C@]2([H])CC[C@@]4(C)[C@]3(O)C(C=C4[C@@H]([C@]5([H])OC(C(C)=C(C)C5)=O)C)=O)(O)CC=CC1=O	InChI=1S/C28H36O7/c1-14-11-20(35-24(32)15(14)2)16(3)18-12-23(31)28(34)19-13-22(30)27(33)9-6-7-21(29)26(27,5)17(19)8-10-25(18,28)4/h6-7,12,16-17,19-20,22,30,33-34H,8-11,13H2,1-5H3/t16-,17-,19+,20+,22+,25+,26-,27-,28+/m0/s1	NNHDRTBARCZFIB-GPMHOMQJSA-N	Physalis minima	2020	10.1021/acsomega.0c00467	111
365	Salpichrolide O	C30H42O7	514.293	514.659	O=C1[C@@]2(C)[C@]([C@@H]3C[C@]4([H])[C@]2([H])CC[C@@]5(C)[C@@]4([H])C[C@@H](OC(C)=O)[C@]5([H])[C@@H]([C@]6([H])O[C@@H](O)[C@@](C)(O7)[C@]7(C)C6)C)(O3)CC=C1	InChI=1S/C30H42O7/c1-15(21-14-27(4)29(6,37-27)25(33)35-21)24-20(34-16(2)31)13-19-17-12-23-30(36-23)10-7-8-22(32)28(30,5)18(17)9-11-26(19,24)3/h7-8,15,17-21,23-25,33H,9-14H2,1-6H3/t15-,17-,18+,19+,20?,21-,23+,24+,25-,26+,27+,28+,29-,30+/m1/s1	MYXQLZRXBHWFOU-PEWHMNKKSA-N	Salpichroa origanifolia	2013	10.1021/np400559p	112
366	Salpichrolide P	C28H40O6	472.283	472.622	O=C1[C@@]2(C)[C@]([C@@H]3C[C@]4([H])[C@]2([H])CC[C@@]5(C)[C@@]4([H])C[C@@H](O)[C@]5([H])[C@@H]([C@]6([H])O[C@@H](O)[C@@](C)(O7)[C@]7(C)C6)C)(O3)CC=C1	InChI=1S/C28H40O6/c1-14(19-13-25(3)27(5,34-25)23(31)32-19)22-18(29)12-17-15-11-21-28(33-21)9-6-7-20(30)26(28,4)16(15)8-10-24(17,22)2/h6-7,14-19,21-23,29,31H,8-13H2,1-5H3/t14-,15-,16+,17+,18-,19-,21+,22+,23-,24+,25+,26+,27-,28+/m1/s1	OQFMRMADGWHYCD-YHOTXTRNSA-N	Salpichroa origanifolia	2013	10.1021/np400559p	112
367	Salpichrolide R	C28H38O6	470.267	470.606	O=C1[C@@]2(C)[C@]([C@@H]3C[C@]4([H])[C@]2([H])CC[C@@]5(C)[C@@]4([H])[C@H](O)C=C5[C@@H]([C@]6([H])O[C@@H](O)[C@@](C)(O7)[C@]7(C)C6)C)(O3)CC=C1	InChI=1S/C28H38O6/c1-14(19-13-25(3)27(5,34-25)23(31)32-19)17-12-18(29)22-15-11-21-28(33-21)9-6-7-20(30)26(28,4)16(15)8-10-24(17,22)2/h6-7,12,14-16,18-19,21-23,29,31H,8-11,13H2,1-5H3/t14-,15+,16-,18+,19+,21-,22+,23+,24+,25-,26-,27+,28-/m0/s1	YSQAQXCFSXPGGZ-YPCKZGDBSA-N	Salpichroa origanifolia	2013	10.1021/np400559p	112
368	Aminophysalin A	C28H33NO10	543.21	543.569	O=C1[C@@]2(O)CC[C@@]3([H])[C@@](C(C4=NC[C@]5([H])[C@]6(C)[C@@]4([H])[C@]2(O)[C@](O1)(C)[C@]([H])(OC5=O)C6)=O)([H])C[C@@H](O)[C@@]([C@]73C)(O)CC=CC7=O	InChI=1S/C28H33NO10/c1-23-10-17-25(3)28(37)20(23)18(29-11-14(23)21(33)38-17)19(32)12-9-16(31)26(35)7-4-5-15(30)24(26,2)13(12)6-8-27(28,36)22(34)39-25/h4-5,12-14,16-17,20,31,35-37H,6-11H2,1-3H3/t12-,13+,14+,16-,17-,20+,23-,24+,25+,26+,27+,28+/m1/s1	XJJVYKLOFVKQPG-XKSCOTSBSA-N	Physalis angulata	2014	10.1016/j.steroids.2014.06.016	120
369	Physalin X	C29H38O13	594.231	594.61	O[C@]1(C([C@]2([H])[C@]3(O1)[C@]4(C)[C@]([H])(O)C[C@]2(C)C(C(O)=O)(OC)C)=O)[C@]5([H])C[C@@H](O)[C@]6(O)[C@@](C(C=CC6)=O)(C)[C@@]5([H])CC[C@]3(O)C(O4)=O	InChI=1S/C29H38O13/c1-22(25(4,40-5)20(34)35)12-17(32)24(3)29-18(22)19(33)28(39,42-29)14-11-16(31)26(37)9-6-7-15(30)23(26,2)13(14)8-10-27(29,38)21(36)41-24/h6-7,13-14,16-18,31-32,37-39H,8-12H2,1-5H3,(H,34,35)/t13-,14+,16+,17+,18-,22-,23-,24-,25?,26-,27-,28+,29-/m0/s1	XYXACLQLWRIXBJ-AZKYUDPBSA-N	Physalis angulata	2017	10.1039/c7ob02205k	121
370	Physalin VIII	C33H38O15	674.221	674.652	O=C1[C@]2([H])[C@]3([C@]4(C)[C@]([H])(O5)C[C@]2(C)[C@@H]6C5=O)[C@](C(O4)=O)(O)CC[C@@]7([H])[C@@]([C@]1(OC6)O3)([H])C[C@@H](O)[C@]8(OC([C@@H](O)CC(OC)=O)=O)[C@@]7(C(C=CC8)=O)C	InChI=1S/C33H38O15/c1-27-12-20-29(3)33-22(27)23(38)32(48-33,44-13-16(27)24(39)45-20)15-10-19(36)31(46-25(40)17(34)11-21(37)43-4)8-5-6-18(35)28(31,2)14(15)7-9-30(33,42)26(41)47-29/h5-6,14-17,19-20,22,34,36,42H,7-13H2,1-4H3/t14-,15+,16-,17-,19+,20+,22-,27+,28-,29-,30-,31-,32-,33-/m0/s1	PGTAYLSVHNSNSC-WMFZSBCWSA-N	Physalis angulata	2017	10.1038/s41598-017-03849-9	122
371	Physalin IX	C28H32O11	544.194	544.553	[H][C@](C[C@]1(C)[C@@H]2C3=O)(O3)[C@@]4(C)[C@@]5(O6)[C@@]1([H])[C@]7(O)[C@@]6(OC2)[C@]8([H])C[C@@H](O)[C@]9(O)[C@](C)(C(C=CC9)=O)[C@@]8([H])[C@]7([H])C[C@]5(O)C(O4)=O	InChI=1S/C28H32O11/c1-21-9-16-23(3)27-19(21)26(35)12(8-25(27,34)20(32)38-23)17-11(28(26,39-27)36-10-13(21)18(31)37-16)7-15(30)24(33)6-4-5-14(29)22(17,24)2/h4-5,11-13,15-17,19,30,33-35H,6-10H2,1-3H3/t11-,12+,13+,15-,16-,17-,19-,21-,22-,23+,24+,25+,26+,27+,28-/m1/s1	XQRVQWPWXYBPRR-UAEUBVEXSA-N	Physalis angulata	2017	10.1038/s41598-017-03849-9	122
372	5α,6β-Dihydroxyphysalin R	C28H32O11	544.194	544.553	O=C1[C@@]2(O)C[C@]3([H])[C@@]4([H])[C@@]([C@@]56[C@@](O)3[C@]7([H])[C@]2(O5)[C@](O1)(C)[C@@](O8)([H])C[C@]7(C)[C@@H](CO6)C8=O)([H])C[C@@H](O)[C@@]([C@]94C)(O)CC=CC9=O	InChI=1S/C28H32O11/c1-21-9-16-23(3)27-19(21)26(35)12(8-25(27,34)20(32)38-23)17-11(28(26,39-27)36-10-13(21)18(31)37-16)7-15(30)24(33)6-4-5-14(29)22(17,24)2/h4-5,11-13,15-17,19,30,33-35H,6-10H2,1-3H3/t11-,12-,13+,15-,16-,17-,19-,21-,22-,23+,24+,25+,26-,27+,28+/m1/s1	XQRVQWPWXYBPRR-BUWFLVJXSA-N	Physalis alkekengi var. Francheti	2012	10.1016/j.fitote.2012.08.011	123
373	5β-Hydroxy-6α-chloro-5,6-dihydrophysalin B	C28H31ClO10	562.161	562.996	O=C1[C@@]2(O)CCC3[C@@]([C@]45C([C@]6([H])[C@]2(O4)[C@](O1)(C)[C@@](O7)([H])C[C@]6(C)[C@@H](CO5)C7=O)=O)([H])C[C@H](Cl)[C@]([C@]83C)(O)CC=CC8=O	InChI=1S/C28H31ClO10/c1-22-10-17-24(3)28-18(22)19(31)27(39-28,36-11-14(22)20(32)37-17)13-9-15(29)25(34)7-4-5-16(30)23(25,2)12(13)6-8-26(28,35)21(33)38-24/h4-5,12-15,17-18,34-35H,6-11H2,1-3H3/t12?,13-,14+,15+,17-,18+,22-,23+,24+,25-,26+,27-,28+/m1/s1	GMDOSYFRKTXTAY-VQCSFSGASA-N	Physalis angulata	2014	10.1016/j.steroids.2014.06.016	120
374	Physalin D1	C28H32O11	544.194	544.553	O=C1[C@]2([H])[C@]3([C@]4(C)[C@]([H])(O5)C[C@]2(C)[C@@H]6C5=O)[C@](C(O4)=O)(O)CC[C@@]7([H])[C@@]([C@@]1(OC6)O3)([H])C[C@H](O)[C@@]8(O)[C@@]7(C(C=CC8)=O)C	InChI=1S/C28H32O11/c1-22-10-17-24(3)28-18(22)19(31)27(39-28,36-11-14(22)20(32)37-17)13-9-16(30)25(34)7-4-5-15(29)23(25,2)12(13)6-8-26(28,35)21(33)38-24/h4-5,12-14,16-18,30,34-35H,6-11H2,1-3H3/t12-,13+,14-,16-,17+,18-,22+,23-,24-,25+,26-,27+,28-/m0/s1	DUGJJSWZRHBJJK-KRVMKZGASA-N	Physalis angulata and Physalis alkekengi L. var. franchetii (Mast.) Makino	2014	10.1016/j.phytol.2014.08.004	47
375	4,7-Didehydrophysalin B	C28H28O9	508.173	508.523	O=C1[C@@]2(O)CCC3[C@@]([C@]45C([C@]6([H])[C@]2(O4)[C@](O1)(C)[C@@](O7)([H])C[C@]6(C)[C@@H](CO5)C7=O)=O)([H])C=CC([C@]83C)=CC=CC8=O	InChI=1S/C28H28O9/c1-23-11-18-25(3)28-19(23)20(30)27(37-28,34-12-16(23)21(31)35-18)15-8-7-13-5-4-6-17(29)24(13,2)14(15)9-10-26(28,33)22(32)36-25/h4-8,14-16,18-19,33H,9-12H2,1-3H3/t14?,15-,16+,18-,19+,23-,24+,25+,26+,27-,28+/m1/s1	BGCIAAKWGXVNLW-ZMWGMMQZSA-N	Physalis solanaceus	2013		124
376	Isophysalin A	C28H30O10	526.184	526.538	O=C1[C@@]2(O)CC[C@@]3([H])[C@@](C4(O)C([C@]5([H])[C@]2(O4)[C@](O1)(C)[C@@](OC6=O)([H])C[C@]5(C)C6=C)=O)([H])[C@H](O)C=C([C@]73C)C=CCC7=O	InChI=1S/C28H30O10/c1-12-21(32)36-17-11-23(12,2)19-20(31)27(35)18-14(24(3)13(10-15(18)29)6-5-7-16(24)30)8-9-26(34)22(33)37-25(17,4)28(19,26)38-27/h5-6,10,14-15,17-19,29,34-35H,1,7-9,11H2,2-4H3/t14-,15+,17+,18-,19-,23+,24-,25-,26-,27?,28-/m0/s1	QACVUYYDSXFEJW-QCXZFJGPSA-N	Physalis alkekengi var. franchetii	2012	10.1016/j.steroids.2011.11.016	126
377	7β-Methoxylisophysalin B	C29H32O10	540.199	540.565	O=C1[C@]2([H])[C@]3([C@]4(C)[C@]([H])(O5)C[C@]2(C)[C@@H]6C5=O)[C@](C(O4)=O)(O)CC[C@@]7([H])[C@@]([C@]1(OC6)O3)([H])[C@@H](OC)C=C8[C@@]7(C(CC=C8)=O)C	InChI=1S/C29H32O10/c1-24-11-18-26(3)29-20(24)21(31)28(39-29,36-12-15(24)22(32)37-18)19-14(8-9-27(29,34)23(33)38-26)25(2)13(10-16(19)35-4)6-5-7-17(25)30/h5-6,10,14-16,18-20,34H,7-9,11-12H2,1-4H3/t14-,15-,16?,18+,19-,20-,24+,25-,26-,27-,28-,29-/m0/s1	HMWZFURQEBSMQD-RYKYTXSXSA-N	Physalis alkekengi var. franchetii	2016	10.1016/j.fitote.2016.05.010	125
378	7β-Methoxylisophysalin C	C29H32O10	540.199	540.565	OC1(C([C@]2([H])[C@]3(O1)[C@]4(C)[C@]([H])(OC5=O)C[C@]2(C)C5=C)=O)[C@]6([H])[C@@H](OC)C=C7[C@](C)(C(CC=C7)=O)[C@@]6([H])CC[C@]3(O)C(O4)=O	InChI=1S/C29H32O10/c1-13-22(32)37-18-12-24(13,2)20-21(31)28(35)19-15(25(3)14(11-16(19)36-5)7-6-8-17(25)30)9-10-27(34)23(33)38-26(18,4)29(20,27)39-28/h6-7,11,15-16,18-20,34-35H,1,8-10,12H2,2-5H3/t15-,16?,18+,19-,20-,24+,25-,26-,27-,28?,29-/m0/s1	WGJJZYKMDWQJKX-PETAEPMHSA-N	Physalis alkekengi var. franchetii	2016	10.1016/j.fitote.2016.05.010	125
379	Physalin V	C28H30O10	526.184	526.538	O=C1[C@@]2(O)CC[C@@]3([H])[C@@]([C@]45C([C@]6([H])[C@]2(O4)[C@](O1)(C)[C@@](O7)([H])C[C@]6(C)[C@@H](CO5)C7=O)=O)([H])[C@H](O)C=C([C@]83C)C=CCC8=O	InChI=1S/C28H30O10/c1-23-10-17-25(3)28-19(23)20(31)27(38-28,35-11-14(23)21(32)36-17)18-13(7-8-26(28,34)22(33)37-25)24(2)12(9-15(18)29)5-4-6-16(24)30/h4-5,9,13-15,17-19,29,34H,6-8,10-11H2,1-3H3/t13-,14-,15+,17+,18-,19-,23+,24-,25-,26-,27+,28-/m0/s1	SZPWFAXUUUYJJT-DMAAJXLASA-N	Physalis alkekengi var. franchetii (Mast.) Makino	2016	10.1016/j.fitote.2016.05.010	125
380	Physalin VII1	C28H30O10	526.184	526.538	O=C1[C@]2([H])[C@]3([C@]4(C)[C@]([H])(O5)C[C@]2(C)[C@]6(O)C5=O)[C@](C(O4)=O)(O)CC[C@@]7([H])[C@@]([C@]1(OC6)O3)([H])CC=C8[C@@]7(C(CC=C8)=O)C	InChI=1S/C28H30O10/c1-22-11-17-24(3)28-18(22)19(30)27(38-28,35-12-26(22,34)20(31)36-17)15-8-7-13-5-4-6-16(29)23(13,2)14(15)9-10-25(28,33)21(32)37-24/h4-5,7,14-15,17-18,33-34H,6,8-12H2,1-3H3/t14-,15+,17+,18-,22-,23-,24-,25-,26+,27-,28-/m0/s1	NORGUSWJFVHKIL-QHHDFGKYSA-N	Physalis angulata L.	2017	10.1038/s41598-017-03849-9	122	Physalin VII
381	Physalin VI1	C28H32O10	528.199	528.554	OC1(C([C@]2([H])[C@]3(O1)[C@]4(C)[C@]([H])(O5)C[C@]2(C)[C@@](C)(O)C5=O)=O)[C@]6([H])CC=C7[C@](C)(C(CC=C7)=O)[C@@]6([H])CC[C@]3(O)C(O4)=O	InChI=1S/C28H32O10/c1-22-12-17(36-20(31)24(22,3)33)25(4)28-18(22)19(30)27(35,38-28)15-9-8-13-6-5-7-16(29)23(13,2)14(15)10-11-26(28,34)21(32)37-25/h5-6,8,14-15,17-18,33-35H,7,9-12H2,1-4H3/t14-,15+,17+,18-,22-,23-,24-,25-,26-,27?,28-/m0/s1	HAQZPNHHJHWWHI-WICJJOGJSA-N	Physalis angulata L.	2017	10.1038/s41598-017-03849-9	122	Physalin VI
382	Physalin VII	C29H34O11	558.21	558.58	O=C1[C@@]2(O)CC[C@@]3([H])[C@@](C4(O)C([C@]5([H])[C@]2(O4)[C@](O1)(C)[C@@](OC6=O)([H])C[C@]5(C)C6=C)=O)([H])C[C@@H](O)[C@@]([C@]73C)(OC)CC=CC7=O	InChI=1S/C29H34O11/c1-13-21(33)38-18-12-23(13,2)19-20(32)28(36)15-11-17(31)27(37-5)9-6-7-16(30)24(27,3)14(15)8-10-26(35)22(34)39-25(18,4)29(19,26)40-28/h6-7,14-15,17-19,31,35-36H,1,8-12H2,2-5H3/t14-,15+,17+,18+,19-,23+,24-,25-,26-,27?,28?,29-/m0/s1	UKWNZLLRVGXCOD-RZJCPHOASA-N	Physalis alkekengi var. franchetii (Mast.) Makino	2016	10.1016/j.fitote.2016.05.010	125
383	Physalin III	C28H32O12	560.189	560.552	O=C1[C@@]2(O)CC[C@@]3([H])[C@@](C4(O)C([C@]5([H])[C@]2(O4)[C@](O1)(C)[C@@](O6)([H])C[C@]5(C)[C@H](C)C6=O)=O)([H])[C@H](O)[C@H]7[C@@]([C@]83C)(O7)[C@H](O)C=CC8=O	InChI=1S/C28H32O12/c1-10-20(33)37-14-9-22(10,2)17-18(32)27(36)15-11(7-8-25(35)21(34)39-24(14,4)28(17,25)40-27)23(3)12(29)5-6-13(30)26(23)19(38-26)16(15)31/h5-6,10-11,13-17,19,30-31,35-36H,7-9H2,1-4H3/t10-,11+,13-,14-,15+,16+,17+,19+,22-,23+,24+,25+,26+,27?,28+/m1/s1	FMDOUHCBSLNHPO-ZCBPJPETSA-N	Physalis alkekengi var. franchetii (Mast.) Makino	2013	10.1007/s13659-013-0021-z	127
384	Physalin IV	C28H32O12	560.189	560.552	O=C1[C@@]2(O)CC[C@@]3([H])[C@@]([C@@]45C([C@]6([H])[C@]2(O4)[C@](O1)(C)[C@@](O7)([H])C[C@]6(C)[C@@H](CO5)C7=O)=O)([H])[C@H](O)[C@H](O)C([C@]83C)=C[C@H](O)CC8=O	InChI=1S/C28H32O12/c1-23-8-15-25(3)28-19(23)20(33)27(40-28,37-9-13(23)21(34)38-15)16-11(4-5-26(28,36)22(35)39-25)24(2)12(17(31)18(16)32)6-10(29)7-14(24)30/h6,10-11,13,15-19,29,31-32,36H,4-5,7-9H2,1-3H3/t10-,11-,13-,15+,16-,17+,18-,19-,23+,24+,25-,26-,27-,28-/m0/s1	VYOSEXGTTBJCBR-ZPLDNXMVSA-N	Physalis alkekengi var. franchetii (Mast.) Makino	2013	10.1007/s13659-013-0021-z	127
385	Isophysalin I	C29H34O11	558.21	558.58	O=C1[C@]2([H])[C@]3([C@]4(C)[C@]([H])(O5)C[C@]2(C)[C@@H]6C5=O)[C@](C(O4)=O)(O)CC[C@@]7([H])[C@@]([C@@]1(OC6)O3)([H])C[C@H](O)[C@]8(OC)[C@@]7(C(CC=C8)=O)C	InChI=1S/C29H34O11/c1-23-11-18-25(3)29-19(23)20(32)28(40-29,37-12-15(23)21(33)38-18)14-10-17(31)27(36-4)8-5-6-16(30)24(27,2)13(14)7-9-26(29,35)22(34)39-25/h5,8,13-15,17-19,31,35H,6-7,9-12H2,1-4H3/t13-,14+,15-,17-,18+,19-,23+,24-,25-,26-,27?,28+,29-/m0/s1	BNUHNQKHDFIHJJ-XYTIJOABSA-N	Physalis alkekengi var. franchetii (Mast.) Makino	2016	10.1016/j.fitote.2016.05.010	125
386	5α,6β-Dihydroxy-25,27-dihydro-7-deoxyphysalin A	C28H34O11	546.21	546.569	O=C1[C@@]2(O)CC[C@@]3([H])[C@@]([C@]4(O)C([C@]5([H])[C@]2(O4)[C@](O1)(C)[C@@](O6)([H])C[C@]5(C)[C@H](C)C6=O)=O)([H])C[C@@H](O)[C@@]([C@]73C)(O)CC=CC7=O	InChI=1S/C28H34O11/c1-12-20(32)37-17-11-22(12,2)18-19(31)27(36)14-10-16(30)25(34)8-5-6-15(29)23(25,3)13(14)7-9-26(35)21(33)38-24(17,4)28(18,26)39-27/h5-6,12-14,16-18,30,34-36H,7-11H2,1-4H3/t12-,13+,14-,16-,17-,18+,22-,23+,24+,25+,26+,27-,28+/m1/s1	DYTMQAPOVPIGMB-JACJCKJBSA-N	Physalis alkekengi var. franchetii (Mast.) Makino	2012	10.1016/j.fitote.2012.08.011	123
387	3β-Hydroxy-2-hydrophysalin A	C28H32O11	544.194	544.553	O=C1[C@@]2(O)CC[C@@]3([H])[C@@]([C@]4(O)C([C@]5([H])[C@]2(O4)[C@](O1)(C)[C@@](OC6=O)([H])C[C@]5(C)C6=C)=O)([H])[C@H](O)C=C([C@]73C)C[C@@H](O)CC7=O	InChI=1S/C28H32O11/c1-11-21(33)37-17-10-23(11,2)19-20(32)27(36)18-14(24(3)12(8-15(18)30)7-13(29)9-16(24)31)5-6-26(35)22(34)38-25(17,4)28(19,26)39-27/h8,13-15,17-19,29-30,35-36H,1,5-7,9-10H2,2-4H3/t13-,14+,15-,17-,18+,19+,23-,24+,25+,26+,27-,28+/m1/s1	DRTSGIJSSIOVHC-YPCYAEHKSA-N	Physalis alkekengi var. franchetii (Mast.) Makino	2012	10.1016/j.fitote.2012.08.011	123
388	3-O-Methylphysalin X	C29H32O10	540.199	540.565	O=C1[C@@]2(O)CC[C@@]3([H])[C@@](C45OC[C@@H]6[C@]7(C)[C@]([H])4[C@]2(OC5=O)[C@](O1)(C)[C@@](OC6=O)([H])C7)([H])C=CC([C@]83C)=C[C@H](OC)CC8=O	InChI=1S/C29H32O10/c1-24-11-19-26(3)29-21(24)28(23(33)39-29,36-12-17(24)20(31)37-19)16-6-5-13-9-14(35-4)10-18(30)25(13,2)15(16)7-8-27(29,34)22(32)38-26/h5-6,9,14-17,19,21,34H,7-8,10-12H2,1-4H3/t14?,15-,16+,17-,19+,21+,24+,25-,26-,27-,28-,29-/m0/s1	XZVBESCRSDELHG-HHMPJVIOSA-N	Physalis alkekengi var. franchetii (Mast.) Makino	2013	10.1007/s13659-013-0021-z	127
389	Physalin VI	C28H32O10	528.199	528.554	O=C1[C@@]2(O)CC[C@@]3([H])[C@@]([C@@]([C@]4([H])[C@]2(O5)[C@](O1)(C)[C@@](O6)([H])C[C@]4(C)[C@H](C)C6=O)(O)C5=O)([H])C=C[C@@]([C@]73C)(O)CC=CC7=O	InChI=1S/C28H32O10/c1-13-18(30)36-17-12-22(13,2)19-27(35)15-7-10-25(33)9-5-6-16(29)23(25,3)14(15)8-11-26(34)20(31)37-24(17,4)28(19,26)38-21(27)32/h5-7,10,13-15,17,19,33-35H,8-9,11-12H2,1-4H3/t13-,14+,15-,17-,19-,22-,23+,24+,25+,26+,27+,28+/m1/s1	AIXIQYHKQUCEBO-MPCVKRCVSA-N	Physalis alkekengi var. franchetii (Mast.) Makino	2016	10.1016/j.fitote.2016.05.010	125
390	5α-Hydroxy-7-dehydro-25,27-dihydro-7-deoxyneophysalin A	C28H32O11	544.194	544.553	O=C1[C@@]2(O)CC[C@@]3([H])[C@@](C45OC[C@@H]6[C@]7(C)[C@]([H])4[C@]2(OC5=O)[C@](O1)(C)[C@@](OC6=O)([H])C7)([H])C[C@H](O)[C@@]([C@]83C)(O)CC=CC8=O	InChI=1S/C28H32O11/c1-22-10-17-24(3)28-19(22)27(21(33)39-28,36-11-14(22)18(31)37-17)13-9-16(30)25(34)7-4-5-15(29)23(25,2)12(13)6-8-26(28,35)20(32)38-24/h4-5,12-14,16-17,19,30,34-35H,6-11H2,1-3H3/t12-,13+,14-,16-,17+,19+,22+,23-,24-,25-,26-,27-,28-/m0/s1	QCLRALFNXIIABI-BAXNYBFQSA-N	Physalis alkekengi var. franchetii (Mast.) Makino	2012	10.1016/j.fitote.2012.08.011	123
391	Withaphysalin Z	C28H34O9	514.22	514.571	O=C(C=CC1)[C@@]2(C)C1=CC[C@]3([H])[C@]2([H])C[C@@H](O)[C@]45[C@]([C@](C)([C@]6([H])OC(C(C)=C(CO)C6)=O)OC5=O)([H])C[C@@H](O)[C@@]34O	InChI=1S/C28H34O9/c1-13-14(12-29)9-22(36-23(13)33)26(3)18-11-21(32)28(35)16-8-7-15-5-4-6-19(30)25(15,2)17(16)10-20(31)27(18,28)24(34)37-26/h4,6-7,16-18,20-22,29,31-32,35H,5,8-12H2,1-3H3/t16-,17+,18-,20-,21-,22-,25+,26-,27+,28+/m1/s1	RSQKAHLDQMIPCO-VCEOUDADSA-N	Physalis angulata L.	2016	10.1021/acs.jnatprod.6b00094	66
392	15-Hydroxy-withphysalin U	C28H34O7	482.231	482.573	O=C(C=CC1)[C@@]2(C)C1=CC[C@]3([H])[C@]2([H])CC[C@@]45[C@@]3(O)[C@@H](O)C[C@@H]4[C@](C)([C@]6([H])OC(C(C)=C(C)C6)=O)OC5=O	InChI=1S/C28H34O7/c1-14-12-22(34-23(31)15(14)2)26(4)19-13-21(30)28(33)18-9-8-16-6-5-7-20(29)25(16,3)17(18)10-11-27(19,28)24(32)35-26/h5,7-8,17-19,21-22,30,33H,6,9-13H2,1-4H3/t17-,18+,19+,21-,22+,25-,26+,27+,28-/m0/s1	KFPBDISJAWFNID-IPHOHTMWSA-N	Physalis alkekengi var. franchetii (Mast.) Makino	2020	10.1016/j.bioorg.2020.103614	30
393	Withaminima D	C28H34O6	466.236	466.574	O=C(C=CC1)[C@@]2(C)C1=CC[C@]3([H])[C@]2([H])CC[C@]45[C@@H]([C@](C)([C@]6([H])OC(C(CO)=C(C)C6)=O)OC5=O)CC[C@@]34[H]	InChI=1S/C28H34O6/c1-15-13-23(33-24(31)18(15)14-29)27(3)21-10-9-20-17-8-7-16-5-4-6-22(30)26(16,2)19(17)11-12-28(20,21)25(32)34-27/h4,6-7,17,19-21,23,29H,5,8-14H2,1-3H3/t17-,19+,20+,21-,23-,26+,27-,28-/m1/s1	YCAJFQBNPGFGHA-YZQIGKSRSA-N	Physalis minima	2019	10.1016/s1875-5364(19)30054-8	139
394	Withaminima E	C28H34O7	482.231	482.573	O=C(C=CC1)[C@@]2(C)C1=CC[C@]3([H])[C@]2([H])CC[C@]45[C@@H]([C@](C)([C@]6([H])OC(C(CO)=C(C)C6)=O)OC5=O)CC[C@@]34O	InChI=1S/C28H34O7/c1-15-13-22(34-23(31)17(15)14-29)26(3)20-10-12-28(33)19-8-7-16-5-4-6-21(30)25(16,2)18(19)9-11-27(20,28)24(32)35-26/h4,6-7,18-20,22,29,33H,5,8-14H2,1-3H3/t18-,19+,20+,22+,25-,26+,27+,28+/m0/s1	MFRKLWOFMFMTEQ-UENQGIQXSA-N	Physalis minima	2019	10.1016/s1875-5364(19)30054-8	139
395	Withaminima F	C28H34O7	482.231	482.573	O=C(C=CC1)[C@@]2(C)C1=CC[C@]3([H])[C@]2([H])CC[C@]45[C@@H]([C@](C)([C@]6([H])OC(C(C)=C(CO)C6)=O)OC5=O)CC[C@@]34O	InChI=1S/C28H34O7/c1-15-16(14-29)13-22(34-23(15)31)26(3)20-10-12-28(33)19-8-7-17-5-4-6-21(30)25(17,2)18(19)9-11-27(20,28)24(32)35-26/h4,6-7,18-20,22,29,33H,5,8-14H2,1-3H3/t18-,19+,20+,22+,25-,26+,27+,28+/m0/s1	OJOSUNNEMJMNRH-UENQGIQXSA-N	Physalis minima	2019	10.1016/s1875-5364(19)30054-8	139
396	Physaminimin N	C28H36O8	500.241	500.588	O=C1[C@@]2(C)[C@]([C@H](O)C[C@]3([H])[C@]2([H])CC[C@]45[C@]([C@](C)([C@]6([H])OC(C(C)=C(C)C6)=O)OC5=O)([H])CC[C@@]34O)(O)CC=C1	InChI=1S/C28H36O8/c1-14-12-21(35-22(31)15(14)2)25(4)18-8-11-27(33)17-13-20(30)28(34)9-5-6-19(29)24(28,3)16(17)7-10-26(18,27)23(32)36-25/h5-6,16-18,20-21,30,33-34H,7-13H2,1-4H3/t16-,17+,18+,20+,21+,24-,25+,26+,27+,28-/m0/s1	PMJMDQQHBCVGBA-SVYXCKMUSA-N	Physalis minima	2016	10.1016/j.phytol.2015.11.005	128
397	Physaminimin O	C28H34O7	482.231	482.573	O=C1[C@@]2(C)[C@](C=C[C@]3([H])[C@]2([H])CC[C@]45[C@]([C@](C)([C@]6([H])OC(C(C)=C(C)C6)=O)OC5=O)([H])CC[C@@]34O)(O)CC=C1	InChI=1S/C28H34O7/c1-15-14-21(34-22(30)16(15)2)25(4)19-9-13-28(33)18-7-11-26(32)10-5-6-20(29)24(26,3)17(18)8-12-27(19,28)23(31)35-25/h5-7,11,17-19,21,32-33H,8-10,12-14H2,1-4H3/t17-,18+,19+,21+,24-,25+,26-,27+,28+/m0/s1	LURWHPSCABEHMS-XAXSPGBVSA-N	Physalis minima	2016	10.1016/j.phytol.2015.11.005	128
398	Physaminimin C	C28H38O8	502.257	502.604	O=C1[C@@]2(C)[C@]([C@H](O)C[C@]3([H])[C@]2([H])CC[C@]45[C@]([C@](C)([C@]6([H])OC(C(C)=C(C)C6)=O)O[C@@H]5O)([H])C[C@H](O)[C@@]34[H])(O)CC=C1	InChI=1S/C28H38O8/c1-13-10-21(35-23(32)14(13)2)26(4)18-12-17(29)22-15-11-20(31)28(34)8-5-6-19(30)25(28,3)16(15)7-9-27(18,22)24(33)36-26/h5-6,15-18,20-22,24,29,31,33-34H,7-12H2,1-4H3/t15-,16+,17+,18-,20-,21-,22-,24+,25+,26-,27+,28+/m1/s1	UGYOZPGRLBJJDW-RMOYLLKGSA-N	Physalis minima	2014	10.1016/j.steroids.2014.01.004	129
399	Withaphysalin 1	C28H36O7	484.246	484.589	O=C(C=C[C@@H]1O)[C@@]2(C)C1=C[C@H](O)[C@]3([H])[C@]2([H])CC[C@]45[C@]([C@](C)([C@]6([H])OC(C(C)=C(C)C6)=O)OC5O)([H])CC[C@@]34[H]	InChI=1S/C28H36O7/c1-13-11-22(34-24(32)14(13)2)27(4)20-7-5-16-23-15(9-10-28(16,20)25(33)35-27)26(3)17(12-19(23)30)18(29)6-8-21(26)31/h6,8,12,15-16,18-20,22-23,25,29-30,33H,5,7,9-11H2,1-4H3/t15-,16-,18-,19-,20+,22+,23+,25?,26+,27+,28+/m0/s1	XNHHHDWDVNZCPD-CHFWHNDVSA-N	Eriolarynx iochromoides	2019	10.1021/acs.jnatprod.9b00117	81
400	15-Hydroxy-withaphysalin B	C28H36O7	484.246	484.589	O=C1[C@@]2(C)[C@@]([C@H]3C[C@]4([H])[C@]2([H])CC[C@@]56[C@@]4([H])[C@@H](O)C[C@@H]5[C@](C)([C@]7([H])OC(C(C)=C(C)C7)=O)OC6O)(O3)CC=C1	InChI=1S/C28H36O7/c1-13-10-20(33-23(31)14(13)2)26(4)18-12-17(29)22-15-11-21-28(34-21)8-5-6-19(30)25(28,3)16(15)7-9-27(18,22)24(32)35-26/h5-6,15-18,20-22,24,29,32H,7-12H2,1-4H3/t15-,16+,17+,18-,20-,21-,22-,24?,25+,26-,27+,28-/m1/s1	RSJLYQPCZROIMR-VUDMWOMBSA-N	Physalis alkekengi var. franchetii (Mast.) Makino	2020	10.1016/j.bioorg.2020.103614	30
401	(17S, 20R,22R)-5β,6β:18,20-Diepoxy-15α,18-dihydroxy-1-oxowitha-24-enolide (18R and 18S)	C28H38O7	486.262	486.605	O=C1[C@@]2(C)[C@@]([C@H]3C[C@]4([H])[C@]2([H])CC[C@@]56[C@@]4([H])[C@@H](O)C[C@@H]5[C@](C)([C@]7([H])OC(C(C)=C(C)C7)=O)OC6O)(O3)CCC1	InChI=1S/C28H38O7/c1-13-10-20(33-23(31)14(13)2)26(4)18-12-17(29)22-15-11-21-28(34-21)8-5-6-19(30)25(28,3)16(15)7-9-27(18,22)24(32)35-26/h15-18,20-22,24,29,32H,5-12H2,1-4H3/t15-,16+,17+,18-,20-,21-,22-,24?,25+,26-,27+,28-/m1/s1	XXSXVGYZXFEOOQ-VUDMWOMBSA-N	Physalis alkekengi var. franchetii (Mast.) Makino	2020	10.1016/j.bioorg.2020.103614	30
402	(17S,20R,22R)-5β,6β:18,20-Diepoxy-18-hydroxy-1-oxowitha-24-enolide (18R and 18S)	C28H38O6	470.267	470.606	O=C1[C@@]2(C)[C@@]([C@H]3C[C@]4([H])[C@]2([H])CC[C@@]56[C@@]4([H])CC[C@@H]5[C@](C)([C@]7([H])OC(C(C)=C(C)C7)=O)OC6O)(O3)CCC1	InChI=1S/C28H38O6/c1-14-12-21(32-23(30)15(14)2)26(4)19-8-7-18-16-13-22-28(33-22)10-5-6-20(29)25(28,3)17(16)9-11-27(18,19)24(31)34-26/h16-19,21-22,24,31H,5-13H2,1-4H3/t16-,17+,18+,19-,21-,22-,24?,25+,26-,27-,28-/m1/s1	FLZZAANORGDVDW-AWZDPCJNSA-N	Physalis alkekengi var. franchetii (Mast.) Makino	2020	10.1016/j.bioorg.2020.103614	30
403	Withaphysalin V	C28H36O6	468.251	468.59	O=C(C=CC1)[C@@]2(C)C1=C[C@@H](O)[C@]3([H])[C@]2([H])CC[C@]45[C@]([C@](C)([C@]6([H])OC(C(C)=C(C)C6)=O)OC5O)([H])CC[C@@]34[H]	InChI=1S/C28H36O6/c1-14-12-22(33-24(31)15(14)2)27(4)20-9-8-18-23-17(10-11-28(18,20)25(32)34-27)26(3)16(13-19(23)29)6-5-7-21(26)30/h5,7,13,17-20,22-23,25,29,32H,6,8-12H2,1-4H3/t17-,18-,19+,20+,22+,23+,25?,26-,27+,28+/m0/s1	WWBWFNYDOFRMMF-APWLWWKESA-N	Deprea bitteriana	2015	10.1016/j.phytochem.2014.11.015	131
404	Withaphysalin W	C28H36O6	468.251	468.59	O=C(CC=C1)[C@@]2(C)C1=C[C@@H](O)[C@]3([H])[C@]2([H])CC[C@]45[C@]([C@](C)([C@]6([H])OC(C(C)=C(C)C6)=O)OC5O)([H])CC[C@@]34[H]	InChI=1S/C28H36O6/c1-14-12-22(33-24(31)15(14)2)27(4)20-9-8-18-23-17(10-11-28(18,20)25(32)34-27)26(3)16(13-19(23)29)6-5-7-21(26)30/h5-6,13,17-20,22-23,25,29,32H,7-12H2,1-4H3/t17-,18-,19+,20+,22+,23+,25?,26-,27+,28+/m0/s1	HHWHYJNHHONIQC-APWLWWKESA-N	Deprea bitteriana	2015	10.1016/j.phytochem.2014.11.015	131
405	Physaminimin D	C29H40O8	516.272	516.631	O=C1[C@@]2(C)[C@]([C@H](O)C[C@]3([H])[C@]2([H])CC[C@]45[C@]([C@](C)([C@]6([H])OC(C(C)=C(C)C6)=O)O[C@H]5OC)([H])C[C@H](O)[C@@]34[H])(O)CC=C1	InChI=1S/C29H40O8/c1-14-11-22(36-24(33)15(14)2)27(4)19-13-18(30)23-16-12-21(32)29(34)9-6-7-20(31)26(29,3)17(16)8-10-28(19,23)25(35-5)37-27/h6-7,16-19,21-23,25,30,32,34H,8-13H2,1-5H3/t16-,17+,18+,19-,21-,22-,23-,25?,26+,27-,28+,29+/m1/s1	NPXYPNIBFMPFKU-ITRXYIBMSA-N	Physalis minima	2014	10.1016/j.steroids.2014.01.004	129
406	Physaminimin E	C29H38O7	498.262	498.616	O=C1[C@@]2(C)C([C@H](O)C[C@]3([H])[C@]2([H])CC[C@@]4([C@H](OC)O5)[C@@]3([H])[C@@H](O)C[C@@H]4[C@]5(C)[C@]6([H])OC(C(C)=C(C)C6)=O)=CC=C1	InChI=1S/C29H38O7/c1-14-11-23(35-25(33)15(14)2)28(4)21-13-20(31)24-16-12-19(30)18-7-6-8-22(32)27(18,3)17(16)9-10-29(21,24)26(34-5)36-28/h6-8,16-17,19-21,23-24,26,30-31H,9-13H2,1-5H3/t16-,17+,19-,20+,21-,23-,24-,26?,27-,28-,29+/m1/s1	MXEJJZMXXIUYBI-IMAKGGFLSA-N	Physalis minima	2014	10.1016/j.steroids.2014.01.004	129
407	Physaminimin G	C30H42O8	530.288	530.658	O=C1[C@@]2(C)[C@]([C@H](O)C[C@]3([H])[C@]2([H])CC[C@]45[C@]([C@](C)([C@]6([H])OC(C(C)=C(C)C6)=O)O[C@H]5OC)([H])C[C@H](O)[C@@]34[H])(OC)CC=C1	InChI=1S/C30H42O8/c1-15-12-23(37-25(34)16(15)2)28(4)20-14-19(31)24-17-13-22(33)30(36-6)10-7-8-21(32)27(30,3)18(17)9-11-29(20,24)26(35-5)38-28/h7-8,17-20,22-24,26,31,33H,9-14H2,1-6H3/t17-,18+,19+,20-,22-,23-,24-,26?,27+,28-,29+,30?/m1/s1	QMBZNFYZHKUOCF-JFVTUERQSA-N	Physalis minima	2016	10.1016/j.phytol.2015.11.005	128
408	Physaminimin I	C29H40O8	516.272	516.631	O=C1[C@@]2(C)[C@@]([C@@H](O)C[C@]3([H])[C@]2([H])CC[C@]45[C@]([C@](C)([C@]6([H])OC(C(C)=C(C)C6)=O)O[C@H]5OC)([H])C[C@H](O)[C@@]34[H])(O)CC=C1	InChI=1S/C29H40O8/c1-14-11-22(36-24(33)15(14)2)27(4)19-13-18(30)23-16-12-21(32)29(34)9-6-7-20(31)26(29,3)17(16)8-10-28(19,23)25(35-5)37-27/h6-7,16-19,21-23,25,30,32,34H,8-13H2,1-5H3/t16-,17+,18+,19-,21+,22-,23-,25?,26+,27-,28+,29-/m1/s1	NPXYPNIBFMPFKU-ZCEITJJRSA-N	Physalis minima	2016	10.1016/j.phytol.2015.11.005	128
409	Physaminimin L	C29H42O7	502.293	502.648	O=C1[C@@]2(C)[C@]([C@H](O)C[C@]3([H])[C@]2([H])CC[C@]45[C@]([C@](C)([C@]6([H])OC(C(C)=C(C)C6)=O)O[C@H]5OC)([H])CC[C@@]34[H])(O)CCC1	InChI=1S/C29H42O7/c1-15-13-23(35-24(32)16(15)2)27(4)20-9-8-19-17-14-22(31)29(33)11-6-7-21(30)26(29,3)18(17)10-12-28(19,20)25(34-5)36-27/h17-20,22-23,25,31,33H,6-14H2,1-5H3/t17-,18+,19+,20-,22-,23-,25?,26+,27-,28-,29+/m1/s1	NNDDBUUHTGQRDJ-WZXOTYFGSA-N	Physalis minima	2016	10.1016/j.phytol.2015.11.005	128
410	rel-(18R,22R)-5β,6β:18β,20-Diepoxy-3β,18α-dimethoxy-4β-hydroxy-1-oxowith-24-enolide	C30H42O8	530.288	530.658	O=C1[C@@]2(C)[C@@]([C@H]3C[C@]4([H])[C@]2([H])CC[C@@]56[C@@]4([H])CC[C@]5([H])[C@@]([C@]7([H])OC(C(C)=C(C)C7)=O)(C)O[C@H]6OC)(O3)[C@@H](O)[C@@H](OC)C1	InChI=1S/C30H42O8/c1-14-11-22(36-25(33)15(14)2)28(4)20-8-7-18-16-12-23-30(37-23)24(32)19(34-5)13-21(31)27(30,3)17(16)9-10-29(18,20)26(35-6)38-28/h16-20,22-24,26,32H,7-13H2,1-6H3/t16-,17+,18+,19?,20-,22-,23-,24+,26?,27+,28-,29-,30+/m1/s1	DBGZLSYLDYDESI-CBYMGDHRSA-N	Acnistus arborescens	2016	10.1016/j.phytochem.2016.07.003	37
411	Physaminimin H	C30H42O8	530.288	530.658	O=C1[C@@]2(C)[C@]([C@H](O)C[C@]3([H])[C@]2([H])CC[C@]45[C@]([C@](C)([C@]6([H])OC(C(C)=C(C)C6)=O)O[C@@H]5OC)([H])C[C@H](O)[C@@]34[H])(OC)CC=C1	InChI=1S/C30H42O8/c1-15-12-23(37-25(34)16(15)2)28(4)20-14-19(31)24-17-13-22(33)30(36-6)10-7-8-21(32)27(30,3)18(17)9-11-29(20,24)26(35-5)38-28/h7-8,17-20,22-24,26,31,33H,9-14H2,1-6H3/t17-,18+,19+,20-,22-,23-,24-,26?,27+,28-,29+,30?/m1/s1	QMBZNFYZHKUOCF-JFVTUERQSA-N	Physalis minima	2016	10.1016/j.phytol.2015.11.005	128
412	Physaminimin J	C29H40O8	516.272	516.631	O=C1[C@@]2(C)[C@@]([C@@H](O)C[C@]3([H])[C@]2([H])CC[C@]45[C@]([C@](C)([C@]6([H])OC(C(C)=C(C)C6)=O)O[C@@H]5OC)([H])C[C@H](O)[C@@]34[H])(O)CC=C1	InChI=1S/C29H40O8/c1-14-11-22(36-24(33)15(14)2)27(4)19-13-18(30)23-16-12-21(32)29(34)9-6-7-20(31)26(29,3)17(16)8-10-28(19,23)25(35-5)37-27/h6-7,16-19,21-23,25,30,32,34H,8-13H2,1-5H3/t16-,17+,18+,19-,21+,22-,23-,25?,26+,27-,28+,29-/m1/s1	NPXYPNIBFMPFKU-ZCEITJJRSA-N	Physalis minima	2016	10.1016/j.phytol.2015.11.005	128
413	Physaminimin K	C29H38O7	498.262	498.616	O=C1[C@@]2(C)C([C@H](O)C[C@]3([H])[C@]2([H])CC[C@]45[C@]([C@](C)([C@]6([H])OC(C(C)=C(C)C6)=O)O[C@@H]5OC)([H])C[C@H](O)[C@@]34[H])=CC=C1	InChI=1S/C29H38O7/c1-14-11-23(35-25(33)15(14)2)28(4)21-13-20(31)24-16-12-19(30)18-7-6-8-22(32)27(18,3)17(16)9-10-29(21,24)26(34-5)36-28/h6-8,16-17,19-21,23-24,26,30-31H,9-13H2,1-5H3/t16-,17+,19-,20+,21-,23-,24-,26?,27-,28-,29+/m1/s1	MXEJJZMXXIUYBI-IMAKGGFLSA-N	Physalis minima	2016	10.1016/j.phytol.2015.11.005	128
414	Physaminimin M	C29H42O7	502.293	502.648	O=C1[C@@]2(C)[C@]([C@H](O)C[C@]3([H])[C@]2([H])CC[C@]45[C@]([C@](C)([C@]6([H])OC(C(C)=C(C)C6)=O)O[C@@H]5OC)([H])CC[C@@]34[H])(O)CCC1	InChI=1S/C29H42O7/c1-15-13-23(35-24(32)16(15)2)27(4)20-9-8-19-17-14-22(31)29(33)11-6-7-21(30)26(29,3)18(17)10-12-28(19,20)25(34-5)36-27/h17-20,22-23,25,31,33H,6-14H2,1-5H3/t17-,18+,19+,20-,22-,23-,25?,26+,27-,28-,29+/m1/s1	NNDDBUUHTGQRDJ-WZXOTYFGSA-N	Physalis minima	2016	10.1016/j.phytol.2015.11.005	128
415	18β-O-Methyl-withaphysalin 1	C29H38O7	498.262	498.616	O=C(C=C[C@@H]1O)[C@@]2(C)C1=C[C@H](O)[C@]3([H])[C@]2([H])CC[C@]45[C@]([C@](C)([C@]6([H])OC(C(C)=C(C)C6)=O)O[C@@H]5OC)([H])CC[C@@]34[H]	InChI=1S/C29H38O7/c1-14-12-23(35-25(33)15(14)2)28(4)21-8-6-17-24-16(10-11-29(17,21)26(34-5)36-28)27(3)18(13-20(24)31)19(30)7-9-22(27)32/h7,9,13,16-17,19-21,23-24,26,30-31H,6,8,10-12H2,1-5H3/t16-,17-,19-,20-,21+,23+,24+,26?,27+,28+,29+/m0/s1	CMCCZSQKZRMKCG-QOUXFHJNSA-N	Eriolarynx iochromoides	2019	10.1021/acs.jnatprod.9b00117	81
416	18α-O-Ethyl-withaphysalin 1	C30H40O7	512.277	512.643	O=C(C=C[C@@H]1O)[C@@]2(C)C1=C[C@H](O)[C@]3([H])[C@]2([H])CC[C@]45[C@]([C@](C)([C@]6([H])OC(C(C)=C(C)C6)=O)O[C@H]5OCC)([H])CC[C@@]34[H]	InChI=1S/C30H40O7/c1-6-35-27-30-12-11-17-25(21(32)14-19-20(31)8-10-23(33)28(17,19)4)18(30)7-9-22(30)29(5,37-27)24-13-15(2)16(3)26(34)36-24/h8,10,14,17-18,20-22,24-25,27,31-32H,6-7,9,11-13H2,1-5H3/t17-,18-,20-,21-,22+,24+,25+,27?,28+,29+,30+/m0/s1	KOFFRDMYOJLTGB-NOCZMNLBSA-N	Eriolarynx iochromoides	2019	10.1021/acs.jnatprod.9b00117	81
417	Withaminima B	C28H34O8	498.225	498.572	O=C(C=CC1)[C@@]2(C)C1=CC[C@]3([H])[C@]2([H])CC[C@@]4(O)[C@@H]([C@](C)([C@]5([H])OC(C(C)=C(C)C5)=O)OC4=O)C[C@@H](O)C3=O	InChI=1S/C28H34O8/c1-14-12-22(35-24(32)15(14)2)27(4)20-13-19(29)23(31)17-9-8-16-6-5-7-21(30)26(16,3)18(17)10-11-28(20,34)25(33)36-27/h5,7-8,17-20,22,29,34H,6,9-13H2,1-4H3/t17-,18+,19-,20-,22-,26+,27-,28-/m1/s1	VEQRFSWIBLRAKA-GUGBIUCGSA-N	Physalis minima	2019	10.1016/s1875-5364(19)30054-8	139
418	Withaminima C	C28H32O9	512.205	512.555	O=C1[C@@]2(C)[C@@]([C@H]3C[C@](C4=O)([H])[C@]2([H])CC[C@@]5(O)[C@@H]([C@](C)([C@]6([H])OC(C(C)=C(C)C6)=O)OC5=O)CC4=O)(O3)CC=C1	InChI=1S/C28H32O9/c1-13-10-20(35-23(32)14(13)2)26(4)18-12-17(29)22(31)15-11-21-28(36-21)8-5-6-19(30)25(28,3)16(15)7-9-27(18,34)24(33)37-26/h5-6,15-16,18,20-21,34H,7-12H2,1-4H3/t15-,16+,18-,20-,21-,25+,26-,27-,28-/m1/s1	NZTFFUIKXCNDDP-GACPSACSSA-N	Physalis minima	2019	10.1016/s1875-5364(19)30054-8	139
419	Minisecolide A	C28H36O9	516.236	516.587	O=C1[C@@]2(C)[C@]([C@H](O)C[C@]3([H])[C@]2([H])CC[C@@]4(O)[C@]([C@](C)([C@]5([H])OC(C(C)=C(C)C5)=O)OC4=O)([H])CCC3=O)(O)CC=C1	InChI=1S/C28H36O9/c1-14-12-22(36-23(32)15(14)2)26(4)19-8-7-18(29)16-13-21(31)28(35)10-5-6-20(30)25(28,3)17(16)9-11-27(19,34)24(33)37-26/h5-6,16-17,19,21-22,31,34-35H,7-13H2,1-4H3/t16-,17+,19-,21-,22-,25+,26-,27-,28+/m1/s1	GUBPZQAUDZKPIO-WDGPSWTCSA-N	Physalis minima	2016	10.1002/cbdv.201500282	130
420	Minisecolide B	C28H34O8	498.225	498.572	O=C(C=CC1)[C@@]2(C)C1=CC[C@]3([H])[C@]2([H])CC[C@@]4(O)[C@]([C@](C)([C@]5([H])OC(C(C)=C(C)C5)=O)OC4=O)([H])C[C@H](O)C3=O	InChI=1S/C28H34O8/c1-14-12-22(35-24(32)15(14)2)27(4)20-13-19(29)23(31)17-9-8-16-6-5-7-21(30)26(16,3)18(17)10-11-28(20,34)25(33)36-27/h5,7-8,17-20,22,29,34H,6,9-13H2,1-4H3/t17-,18+,19+,20-,22-,26+,27-,28-/m1/s1	VEQRFSWIBLRAKA-CKVFAMNGSA-N	Physalis minima	2016	10.1002/cbdv.201500282	130
421	Minisecolide C	C28H34O7	482.231	482.573	O=C(CC=C1)[C@@]2(C)C1=CC[C@]3([H])[C@]2([H])CC[C@@]4(O)[C@]([C@](C)([C@]5([H])OC(C(C)=C(C)C5)=O)OC4=O)([H])CCC3=O	InChI=1S/C28H34O7/c1-15-14-23(34-24(31)16(15)2)27(4)21-11-10-20(29)18-9-8-17-6-5-7-22(30)26(17,3)19(18)12-13-28(21,33)25(32)35-27/h5-6,8,18-19,21,23,33H,7,9-14H2,1-4H3/t18-,19+,21-,23-,26+,27-,28-/m1/s1	NKNVDCJQBPLFCC-USAYNMMHSA-N	Physalis minima	2016	10.1002/cbdv.201500282	130
422	(22R)-13,14-Epoxy-14,15,28-trihydroxy-1-oxo-13,14-secowitha-3,5,24-trien-18,20:22,26-diolide	C28H34O9	514.22	514.571	O=C(CC=C1)[C@@]2(C)C1=CC[C@]3([H])[C@]2([H])CC[C@@]4(O5)[C@]([C@](C)([C@]6([H])OC(C(C)=C(CO)C6)=O)OC4=O)([H])C[C@@H](O)C35O	InChI=1S/C28H34O9/c1-14-15(13-29)11-22(35-23(14)32)26(3)19-12-21(31)28(34)18-8-7-16-5-4-6-20(30)25(16,2)17(18)9-10-27(19,37-28)24(33)36-26/h4-5,7,17-19,21-22,29,31,34H,6,8-13H2,1-3H3/t17-,18+,19+,21+,22+,25-,26+,27+,28+/m0/s1	UXGOCQWGPRCOBE-XSFYCCLFSA-N	Physalis angulata L.	2019	10.3390/molecules24081608	54
423	Minisecolide D	C28H38O9	518.252	518.603	O=C1[C@@]2(C)[C@]([C@@H](O)C[C@]3([H])[C@]2([H])CC[C@@]4(O5)[C@]([C@](C)([C@]6([H])OC(C(C)=C(C)C6)=O)OC4O)([H])CCC35O)(O)CC=C1	InChI=1S/C28H38O9/c1-14-12-21(35-22(31)15(14)2)25(4)18-8-11-28(34)17-13-20(30)27(33)9-5-6-19(29)24(27,3)16(17)7-10-26(18,37-28)23(32)36-25/h5-6,16-18,20-21,23,30,32-34H,7-13H2,1-4H3/t16-,17+,18+,20-,21+,23?,24-,25+,26+,27-,28-/m0/s1	IMULXTBMUIFZIR-SRSJVIDNSA-N	Physalis minima	2016	10.1002/cbdv.201500282	130
424	Withaphysalin X	C28H36O8	500.241	500.588	O=C(C=CC1)[C@@]2(C)C1=CC[C@]3([H])[C@]2([H])CC[C@@]4(O5)[C@]([C@](C)([C@]6([H])OC(C(CO)=C(C)C6)=O)OC4O)([H])CCC35O	InChI=1S/C28H36O8/c1-15-13-22(34-23(31)17(15)14-29)26(3)20-10-12-28(33)19-8-7-16-5-4-6-21(30)25(16,2)18(19)9-11-27(20,36-28)24(32)35-26/h4,6-7,18-20,22,24,29,32-33H,5,8-14H2,1-3H3/t18-,19+,20+,22+,24?,25-,26+,27+,28-/m0/s1	LTEZWKBWTIDVDQ-AZZZFIKWSA-N	Deprea cuyacensis	2015	10.1016/j.phytochem.2014.11.015	131
425	Withaphysalin Y	C28H34O8	498.225	498.572	O=C(C=CC1)[C@@]2(C)C1=CC[C@]3([H])[C@]2([H])CC[C@@]4(O5)[C@]([C@](C)([C@]6([H])OC(C(C)=C(C)C6)=O)OC4=O)([H])C[C@H](O)C35O	InChI=1S/C28H34O8/c1-14-12-22(34-23(31)15(14)2)26(4)19-13-21(30)28(33)18-9-8-16-6-5-7-20(29)25(16,3)17(18)10-11-27(19,36-28)24(32)35-26/h5,7-8,17-19,21-22,30,33H,6,9-13H2,1-4H3/t17-,18+,19+,21-,22+,25-,26+,27+,28+/m0/s1	VYOLNJNDZOKNKP-HUJQIAPSSA-N	Physalis angulata L.	2016	10.1021/acs.jnatprod.6b00094	66
426	Withapubeside B	C34H46O13	662.294	662.729	O=C1C(C)=C(C)C[C@@]([C@]2([C@@]3([H])C[C@@H](O[C@H]4O2)[C@]5([H])[C@]34CC[C@@]6([H])[C@@]5([H])C[C@@H](O)[C@]7(O)[C@]6(C)C(C=C(O[C@@H]([C@@H]8O)O[C@H](CO)[C@@H](O)[C@@H]8O)C7)=O)C)([H])O1	InChI=1S/C34H46O13/c1-13-7-23(46-28(41)14(13)2)32(4)20-10-18-24-16-9-22(37)34(42)11-15(43-29-27(40)26(39)25(38)19(12-35)44-29)8-21(36)31(34,3)17(16)5-6-33(20,24)30(45-18)47-32/h8,16-20,22-27,29-30,35,37-40,42H,5-7,9-12H2,1-4H3/t16-,17+,18-,19-,20-,22-,23-,24-,25-,26+,27-,29-,30+,31+,32-,33+,34+/m1/s1	NKFRQHDLANHQRU-NQNDWKLRSA-N	Physalis pubescens L.	2017	10.1039/c7ob02551c	132
427	Mandragorolide A	C28H38O6	470.267	470.606	O=C1[C@@]2(C)[C@]([C@@H](O3)[C@@H]3[C@]4([H])[C@]2([H])CC[C@@]5(C)[C@@]4([H])CC[C@@]5([H])[C@]6([H])C[C@@]7(C)[C@@](C)(O)C(O[C@@H]6C7)=O)(O)CC=C1	InChI=1S/C28H38O6/c1-24-12-14(18(13-24)33-23(30)27(24,4)31)15-7-8-16-20-17(9-11-25(15,16)2)26(3)19(29)6-5-10-28(26,32)22-21(20)34-22/h5-6,14-18,20-22,31-32H,7-13H2,1-4H3/t14-,15-,16-,17-,18+,20-,21-,22-,24+,25+,26-,27-,28-/m0/s1	PFRQUTOHMQGEQD-NPYZITLVSA-N	Mandragora officinarum	2010	10.1016/j.fitote.2010.05.013	104
428	4β-Hydroxyacnistin I	C28H38O7	486.262	486.605	O=C1[C@@]2(C)[C@@]([C@H]3C[C@]4([H])[C@]2([H])CC[C@@]5(C)[C@@]4([H])C[C@@H](O)[C@]5([H])[C@]6([H])C[C@@]7(C)[C@@](C)(O)C(O[C@@H]6C7)=O)(O3)[C@@H](O)C=C1	InChI=1S/C28H38O7/c1-24-11-14(18(12-24)34-23(32)27(24,4)33)22-17(29)10-16-13-9-21-28(35-21)20(31)6-5-19(30)26(28,3)15(13)7-8-25(16,22)2/h5-6,13-18,20-22,29,31,33H,7-12H2,1-4H3/t13-,14-,15+,16+,17-,18-,20+,21-,22+,24-,25+,26+,27+,28-/m1/s1	UNINYNWCNYQKBL-OJDMZRJFSA-N	Tubocapsicum anomalum	2018	10.1016/j.bioorg.2018.08.034	40
429	25-Epi-anomanolide A	C28H38O7	486.262	486.605	O=C1[C@@]2(C)[C@@]([C@H]3C[C@]4([H])[C@]2([H])CC[C@@]5(C)[C@@]4([H])CC[C@]5(O)[C@]6([H])C[C@@]7(C)[C@](C)(O)C(O[C@@H]6C7)=O)(O3)[C@@H](O)C=C1	InChI=1S/C28H38O7/c1-23-12-17(18(13-23)34-22(31)26(23,4)32)27(33)10-8-15-14-11-21-28(35-21)20(30)6-5-19(29)25(28,3)16(14)7-9-24(15,27)2/h5-6,14-18,20-21,30,32-33H,7-13H2,1-4H3/t14-,15-,16-,17+,18+,20-,21+,23+,24-,25-,26+,27-,28+/m0/s1	FKQUQCYOBZEPTK-WEPNWNNSSA-N	Tubocapsicum anomalum	2018	10.1016/j.bioorg.2018.08.034	40
430	4β-Hydroxyanomanolide E	C28H40O9	520.267	520.619	O=C1[C@@]2(C)[C@@]([C@@H](O)C[C@]3([H])[C@]2([H])CC[C@@]4(C)[C@@]3([H])C[C@@H](O)[C@]4(O)[C@]5([H])C[C@@]6(C)[C@@](C)(O)C(O[C@@H]5C6)=O)(O)[C@@H](O)C=C1	InChI=1S/C28H40O9/c1-23-11-16(17(12-23)37-22(33)26(23,4)34)27(35)21(32)10-15-13-9-20(31)28(36)19(30)6-5-18(29)25(28,3)14(13)7-8-24(15,27)2/h5-6,13-17,19-21,30-32,34-36H,7-12H2,1-4H3/t13-,14+,15+,16-,17-,19+,20+,21-,23-,24+,25+,26+,27-,28-/m1/s1	BVAIFTUVLDCTLM-PPMZASCCSA-N	Tubocapsicum anomalum	2018	10.1016/j.bioorg.2018.08.034	40
431	2,3-Dihydroanomanolide A	C28H40O7	488.277	488.621	O=C1[C@@]2(C)[C@@]([C@H]3C[C@]4([H])[C@]2([H])CC[C@@]5(C)[C@@]4([H])CC[C@]5(O)[C@]6([H])C[C@@]7(C)[C@@](C)(O)C(O[C@@H]6C7)=O)(O3)[C@@H](O)CC1	InChI=1S/C28H40O7/c1-23-12-17(18(13-23)34-22(31)26(23,4)32)27(33)10-8-15-14-11-21-28(35-21)20(30)6-5-19(29)25(28,3)16(14)7-9-24(15,27)2/h14-18,20-21,30,32-33H,5-13H2,1-4H3/t14-,15-,16-,17+,18+,20-,21+,23+,24-,25-,26-,27-,28+/m0/s1	RBNDHGCRRMVRSQ-GARHYCACSA-N	Tubocapsicum anomalum	2018	10.1016/j.bioorg.2018.08.034	40
432	3β-Methoxy-2,3-dihydroanomanolide C	C29H42O9	534.283	534.646	O=C1[C@@]2(C)[C@@]([C@H]3C[C@]4([H])[C@]2([H])CC[C@@]5(C)[C@@]4([H])C[C@@H](O)[C@]5(O)[C@]6([H])C[C@@]7(C)[C@@](C)(O)C(O[C@@H]6C7)=O)(O3)[C@@H](O)[C@@H](OC)C1	InChI=1S/C29H42O9/c1-24-11-16(18(12-24)37-23(33)27(24,4)34)28(35)20(31)9-15-13-8-21-29(38-21)22(32)17(36-5)10-19(30)26(29,3)14(13)6-7-25(15,28)2/h13-18,20-22,31-32,34-35H,6-12H2,1-5H3/t13-,14+,15+,16-,17?,18-,20-,21-,22+,24-,25+,26+,27+,28-,29+/m1/s1	HMNAWIVAMWBNRC-RYBDUDMXSA-N	Tubocapsicum anomalum	2018	10.1016/j.bioorg.2018.08.034	40
433	Acnistin I1	C28H38O6	470.267	470.606	O=C1[C@@]2(C)[C@@]([C@H]3C[C@]4([H])[C@]2([H])CC[C@@]5(C)[C@@]4([H])C[C@@H](O)[C@]5([H])[C@]6([H])C[C@@]7(C)[C@@](C)(O)C(O[C@@H]6C7)=O)(O3)CC=C1	InChI=1S/C28H38O6/c1-24-12-15(19(13-24)33-23(31)27(24,4)32)22-18(29)11-17-14-10-21-28(34-21)8-5-6-20(30)26(28,3)16(14)7-9-25(17,22)2/h5-6,14-19,21-22,29,32H,7-13H2,1-4H3/t14-,15-,16+,17+,18-,19-,21-,22+,24-,25+,26+,27+,28-/m1/s1	ZQXKKKWYSQMGQL-WNFXLGAASA-N	Nicandra john-tyleriana	2015	10.1021/np500824f	31	Acnistin I
434	Acnistin J	C28H40O7	488.277	488.621	O=C1[C@@]2(C)[C@]([C@H](O)C[C@]3([H])[C@]2([H])CC[C@@]4(C)[C@@]3([H])C[C@@H](O)[C@]4([H])[C@]5([H])C[C@@]6(C)[C@@](C)(O)C(O[C@@H]5C6)=O)(O)CC=C1	InChI=1S/C28H40O7/c1-24-12-15(19(13-24)35-23(32)27(24,4)33)22-18(29)11-17-14-10-21(31)28(34)8-5-6-20(30)26(28,3)16(14)7-9-25(17,22)2/h5-6,14-19,21-22,29,31,33-34H,7-13H2,1-4H3/t14-,15-,16+,17+,18-,19-,21-,22+,24-,25+,26+,27+,28+/m1/s1	ISAXWHBMHUKBBS-QZEZZALVSA-N	Nicandra john-tyleriana	2015	10.1021/np500824f	31
435	Acnistin C	C30H40O8	528.272	528.642	O=C1[C@@]2(C)[C@@]([C@H]3[C@H](OC(C)=O)[C@]4([H])[C@]2([H])CC[C@@]5(C)[C@@]4([H])CC[C@@]5(O)[C@]6([H])C[C@@]7(C)[C@@](C)(O)C(O[C@@H]6C7)=O)(O3)CC=C1	InChI=1S/C30H40O8/c1-15(31)36-22-21-16-9-12-29(35,18-13-25(2)14-19(18)37-24(33)28(25,5)34)26(16,3)11-8-17(21)27(4)20(32)7-6-10-30(27)23(22)38-30/h6-7,16-19,21-23,34-35H,8-14H2,1-5H3/t16-,17-,18+,19+,21-,22?,23+,25+,26-,27-,28-,29+,30+/m0/s1	MBHGSJBBPNCKQX-JNTMCBJFSA-N	Dunalia solanacea	2012	10.1248/cpb.c12-00305	39	Acnistin C
436	Acnistin D	C30H40O7	512.277	512.643	O=C(C=CC1)[C@@]2(C)C1=C[C@H](OC(C)=O)[C@]3([H])[C@]2([H])CC[C@@]4(C)[C@@]3([H])CC[C@@]4(O)[C@]5([H])C[C@@]6(C)[C@@](C)(O)C(O[C@@H]5C6)=O	InChI=1S/C30H40O7/c1-16(31)36-21-13-17-7-6-8-23(32)28(17,4)19-9-11-27(3)18(24(19)21)10-12-30(27,35)20-14-26(2)15-22(20)37-25(33)29(26,5)34/h6,8,13,18-22,24,34-35H,7,9-12,14-15H2,1-5H3/t18-,19-,20+,21?,22+,24-,26+,27-,28-,29-,30+/m0/s1	RLUHHPRNXMHFHX-QGDNXSFGSA-N	Dunalia solanacea	2012	10.1248/cpb.c12-00305	39	Acnistin D
437	Withajardin F	C28H38O6	470.267	470.606	O=C1[C@@]2(C)[C@@]([C@H]3C[C@]4([H])[C@]2([H])CC[C@@]5(C)[C@@]4([H])C[C@@H](O)[C@]5([H])[C@]6([H])C[C@@]7(C)C(O[C@@H]6C[C@@]7(O)C)=O)(O3)CC=C1	InChI=1S/C28H38O6/c1-24-9-7-16-14(10-21-28(34-21)8-5-6-20(30)27(16,28)4)17(24)11-18(29)22(24)15-12-25(2)23(31)33-19(15)13-26(25,3)32/h5-6,14-19,21-22,29,32H,7-13H2,1-4H3/t14-,15-,16+,17+,18-,19-,21-,22+,24+,25+,26+,27+,28-/m1/s1	AZDDQHKYWMWLTI-WCCGUWEXSA-N	Nicandra john-tyleriana	2015	10.1021/np500824f	31
438	Withajardin G	C28H40O7	488.277	488.621	O=C1[C@@]2(C)[C@]([C@@H](O)C[C@]3([H])[C@]2([H])CC[C@@]4(C)[C@@]3([H])C[C@@H](O)[C@]4([H])[C@]5([H])C[C@@]6(C)C(O[C@@H]5C[C@@]6(O)C)=O)(O)CC=C1	InChI=1S/C28H40O7/c1-24-9-7-16-14(10-21(31)28(34)8-5-6-20(30)27(16,28)4)17(24)11-18(29)22(24)15-12-25(2)23(32)35-19(15)13-26(25,3)33/h5-6,14-19,21-22,29,31,33-34H,7-13H2,1-4H3/t14-,15-,16+,17+,18-,19-,21+,22+,24+,25+,26+,27+,28+/m1/s1	OTOQWQDAVWXMFQ-YZTFZTAMSA-N	Nicandra john-tyleriana	2015	10.1021/np500824f	31
439	Withajardin H	C28H39ClO6	506.243	507.064	O=C1[C@@]2(C)[C@]([C@@H](O)C[C@]3([H])[C@]2([H])CC[C@@]4(C)[C@@]3([H])C[C@@H](O)[C@]4([H])[C@]5([H])C[C@@]6(C)C(O[C@@H]5C[C@@]6(O)C)=O)(Cl)CC=C1	InChI=1S/C28H39ClO6/c1-24-9-7-16-14(10-21(32)28(29)8-5-6-20(31)27(16,28)4)17(24)11-18(30)22(24)15-12-25(2)23(33)35-19(15)13-26(25,3)34/h5-6,14-19,21-22,30,32,34H,7-13H2,1-4H3/t14-,15-,16+,17+,18-,19-,21+,22+,24+,25+,26+,27+,28+/m1/s1	XXSDGNCCUQNTEN-YZTFZTAMSA-N	Nicandra john-tyleriana	2015	10.1021/np500824f	31
440	Withajardin I	C28H36O6	468.251	468.59	O=C1[C@@]2(C)[C@@]([C@H]3C[C@]4([H])[C@]2([H])CC[C@@]5(C)[C@@]4([H])CC([C@]5([H])[C@]6([H])C[C@@]7(C)C(O[C@@H]6C[C@@]7(O)C)=O)=O)(O3)CC=C1	InChI=1S/C28H36O6/c1-24-9-7-16-14(10-21-28(34-21)8-5-6-20(30)27(16,28)4)17(24)11-18(29)22(24)15-12-25(2)23(31)33-19(15)13-26(25,3)32/h5-6,14-17,19,21-22,32H,7-13H2,1-4H3/t14-,15-,16+,17+,19-,21-,22+,24+,25+,26+,27+,28-/m1/s1	UPHZPEWPSNWXIW-BIIIPAECSA-N	Nicandra john-tyleriana	2015	10.1021/np500824f	31
441	Withajardin J	C28H38O7	486.262	486.605	O=C1[C@@]2(C)[C@@]([C@H]3C[C@]4([H])[C@]2([H])CC[C@@]5(C)[C@@]4([H])CC[C@]5(O)[C@@](C6)([H])[C@@H]7OC([C@]6([C@@](C)(O)C7)C)=O)(O3)[C@@H](O)C=C1	InChI=1S/C28H38O7/c1-23-9-7-16-14(11-21-28(35-21)20(30)6-5-19(29)26(16,28)4)15(23)8-10-27(23,33)17-12-24(2)22(31)34-18(17)13-25(24,3)32/h5-6,14-18,20-21,30,32-33H,7-13H2,1-4H3/t14-,15-,16-,17+,18+,20-,21+,23-,24-,25-,26-,27-,28+/m0/s1	NQLDADUFZFWFQW-YLSADPJYSA-N	Tubocapsicum anomalum	2018	10.1016/j.bioorg.2018.08.034	40
442	Withajardin K	C28H36O6	468.251	468.59	O=C1[C@@]2(C)[C@@]([C@H]3C[C@]4([H])[C@]2([H])CC[C@@]5(C)[C@@]4([H])CC=C5[C@@](C6)([H])[C@@H]7OC([C@]6([C@@](C)(O)C7)C)=O)(O3)[C@@H](O)C=C1	InChI=1S/C28H36O6/c1-24-10-9-18-14(11-22-28(34-22)21(30)8-7-20(29)27(18,28)4)16(24)5-6-17(24)15-12-25(2)23(31)33-19(15)13-26(25,3)32/h6-8,14-16,18-19,21-22,30,32H,5,9-13H2,1-4H3/t14-,15-,16-,18-,19+,21-,22+,24-,25-,26-,27-,28+/m0/s1	NXSCRORIGGMBAM-IEXRRILZSA-N	Tubocapsicum anomalum	2018	10.1016/j.bioorg.2018.08.034	40
443	17-Epi-withajardin J	C28H38O7	486.262	486.605	O=C1[C@@]2(C)[C@@]([C@H]3C[C@]4([H])[C@]2([H])CC[C@@]5(C)[C@@]4([H])CC[C@@]5(O)[C@@](C6)([H])[C@@H]7OC([C@]6([C@@](C)(O)C7)C)=O)(O3)[C@@H](O)C=C1	InChI=1S/C28H38O7/c1-23-9-7-16-14(11-21-28(35-21)20(30)6-5-19(29)26(16,28)4)15(23)8-10-27(23,33)17-12-24(2)22(31)34-18(17)13-25(24,3)32/h5-6,14-18,20-21,30,32-33H,7-13H2,1-4H3/t14-,15-,16-,17+,18+,20-,21+,23-,24-,25-,26-,27+,28+/m0/s1	NQLDADUFZFWFQW-PYGMNOKUSA-N	Tubocapsicum anomalum	2018	10.1016/j.bioorg.2018.08.034	40
444	Daturamalakin A	C28H40O5	456.288	456.623	O[C@@H](C[C@H](O)C1)[C@@]2(C)C1=CC[C@]3([H])[C@]2([H])CC[C@@]4(C)[C@]3(CC[C@@]4([C@]5([H])CO[C@](C6=C)(C)C[C@@]5([H])OC6=O)[H])[H]	InChI=1S/C28H40O5/c1-15-25(31)33-23-13-27(15,3)32-14-19(23)21-8-7-20-18-6-5-16-11-17(29)12-24(30)28(16,4)22(18)9-10-26(20,21)2/h5,17-24,29-30H,1,6-14H2,2-4H3/t17-,18+,19+,20+,21-,22+,23-,24+,26+,27-,28+/m1/s1	QLUFYOSHSHDJMS-QKMUDTJCSA-N	Enzymatic hydrolysis	2011	10.1016/j.phytochem.2011.07.009	134
445	Daturamalakoside A and withametelin Q	C34H50O10	618.34	618.764	O[C@@H](C[C@H](O[C@@]([H])([C@](O)1[H])O[C@]([H])(CO)[C@@]([H])(O)[C@@]1(O)[H])C2)[C@@]3(C)C2=CC[C@]4([H])[C@]3([H])CC[C@@]5(C)[C@]4(CC[C@@]5([C@]6([H])CO[C@](C7=C)(C)C[C@@]6([H])OC7=O)[H])[H]	InChI=1S/C34H50O10/c1-16-30(40)43-24-13-33(16,3)41-15-20(24)22-8-7-21-19-6-5-17-11-18(42-31-29(39)28(38)27(37)25(14-35)44-31)12-26(36)34(17,4)23(19)9-10-32(21,22)2/h5,18-29,31,35-39H,1,6-15H2,2-4H3/t18-,19+,20+,21+,22-,23+,24-,25-,26+,27-,28+,29-,31-,32+,33-,34+/m1/s1	SLYFUNAQCWZWMB-VUUPLKBFSA-N	Datura metel L.	2011	10.1016/j.phytochem.2011.07.009	134
446	Phenowithanolide	C28H36O3	420.266	420.593	[H][C@]12[C@@]([C@]([H])(CC[C@@]3([C@]4([H])CO[C@](C5=C)(C)C[C@@]4([H])OC5=O)[H])[C@]3(C)CC2)([H])CCC6=C(C)C=CC=C61	InChI=1S/C28H36O3/c1-16-6-5-7-19-18(16)8-9-21-20(19)12-13-27(3)23(21)10-11-24(27)22-15-30-28(4)14-25(22)31-26(29)17(28)2/h5-7,20-25H,2,8-15H2,1,3-4H3/t20-,21-,22+,23+,24-,25-,27+,28-/m1/s1	KBBDYZLRNLANGR-NOPKTSJSSA-N	Acid hydrolysis	2011	10.1016/j.phytochem.2011.07.009	134
447	Withawrightolide	C28H38O5	454.272	454.607	O=C1[C@@]2(C)[C@@]3([C@H](O)C[C@]4([H])[C@]2([H])CC[C@@]5(C)[C@]4(CC[C@@]5([C@]6([H])CO[C@](C7=C)(C)C[C@@]6([H])OC7=O)[H])[H])C[C@H]3C1	InChI=1S/C28H38O5/c1-14-24(31)33-21-12-26(14,3)32-13-17(21)19-6-5-18-16-10-23(30)28-11-15(28)9-22(29)27(28,4)20(16)7-8-25(18,19)2/h15-21,23,30H,1,5-13H2,2-4H3/t15-,16+,17+,18+,19-,20+,21-,23-,25+,26-,27+,28+/m1/s1	RWZUJIPMFKTTKN-BLMPNAGISA-N	Datura wrightii	2013	10.1021/np300766p	135
448	Baimantuoluoline R	C30H42O6	498.298	498.66	O=C1[C@@]2(C)C([C@@H](O)C[C@]3([H])[C@]2([H])CC[C@@]4(C)[C@@]3([H])CC[C@]4([H])[C@@]5([H])[C@@](OC6=O)([H])C[C@@](C6COCC)(C)OC5)=CC=C1	InChI=1S/C30H42O6/c1-5-34-16-23-27(33)36-25-14-29(23,3)35-15-18(25)20-10-9-19-17-13-24(31)22-7-6-8-26(32)30(22,4)21(17)11-12-28(19,20)2/h6-8,17-21,23-25,31H,5,9-16H2,1-4H3/t17-,18-,19-,20+,21-,23?,24-,25+,28-,29+,30+/m0/s1	KGDUUEHWDFFIMX-OWLSVSNYSA-N	Datura metel L.	2020	10.1016/j.fitote.2019.104468	89
449	Baimantuoluoline S	C30H44O7	516.309	516.675	O=C1[C@@]2(C)[C@]([C@H](O)C[C@]3([H])[C@]2([H])CC[C@@]4(C)[C@@]3([H])CC[C@]4([H])[C@@]5([H])[C@@](OC6=O)([H])C[C@@](C6COCC)(C)OC5)(O)CC=C1	InChI=1S/C30H44O7/c1-5-35-16-22-26(33)37-23-14-28(22,3)36-15-18(23)20-9-8-19-17-13-25(32)30(34)11-6-7-24(31)29(30,4)21(17)10-12-27(19,20)2/h6-7,17-23,25,32,34H,5,8-16H2,1-4H3/t17-,18-,19-,20+,21-,22?,23+,25+,27-,28+,29-,30-/m0/s1	RMLAZRLSIISRAP-ALUYCBHASA-N	Datura metel L.	2020	10.1016/j.fitote.2019.104468	89
450	Baimantuoluoline T	C28H40O5	456.288	456.623	O=C1[C@@]2(C)[C@@]([C@H]3C[C@]4([H])[C@]2([H])CC[C@@]5(C)[C@@]4([H])CC[C@]5([H])[C@@]6([H])[C@@](OC7=O)([H])C[C@@](C7C)(C)OC6)(O3)CCC1	InChI=1S/C28H40O5/c1-15-24(30)32-21-13-26(15,3)31-14-17(21)19-8-7-18-16-12-23-28(33-23)10-5-6-22(29)27(28,4)20(16)9-11-25(18,19)2/h15-21,23H,5-14H2,1-4H3/t15?,16-,17-,18-,19+,20-,21+,23+,25-,26+,27-,28+/m0/s1	LPXZVSWZTDUHSD-PQFLEWNESA-N	Datura metel L.	2020	10.1016/j.fitote.2019.104468	89
451	Withametelin L	C28H36O5	452.256	452.591	O=C(C=CC1)[C@@]2(C)C1=CC[C@]3([H])[C@]2([H])C[C@@H](O)[C@@]4(C)[C@]3(CC[C@@]4([C@]5([H])CO[C@](C6=C)(C)C[C@@]5([H])OC6=O)[H])[H]	InChI=1S/C28H36O5/c1-15-25(31)33-22-13-26(15,2)32-14-18(22)20-11-10-19-17-9-8-16-6-5-7-23(29)27(16,3)21(17)12-24(30)28(19,20)4/h5,7-8,17-22,24,30H,1,6,9-14H2,2-4H3/t17-,18-,19-,20+,21-,22+,24+,26+,27-,28-/m0/s1	IZNYGGIUGIZTBU-AYCYVMAPSA-N	Datura metel L. and Datura wrightii	2013	10.1021/np300766p	135
452	Physangulide B	C28H38O7	486.262	486.605	C[C@@]([C@]1([H])OC([C@](O)(C)[C@@]2(C)C1)=O)(O2)[C@@]3([H])CC[C@@]4([H])[C@]5([H])C[C@@H]6[C@]([C@@]7(C)[C@@]5([H])CC[C@@]43C)(O6)[C@@H](O)C=CC7=O	InChI=1S/C28H38O7/c1-23-11-10-16-14(12-20-28(34-20)19(30)9-8-18(29)25(16,28)3)15(23)6-7-17(23)26(4)21-13-24(2,35-26)27(5,32)22(31)33-21/h8-9,14-17,19-21,30,32H,6-7,10-13H2,1-5H3/t14-,15-,16-,17-,19-,20+,21+,23-,24+,25-,26+,27+,28+/m0/s1	OOPHAPFCKZSXEX-UGRYWVNUSA-N	Physalis angulate	2015	10.1016/j.steroids.2015.08.015	46
453	4-O-Acetylphysangulide B	C30H40O8	528.272	528.642	C[C@@]([C@]1([H])OC([C@](O)(C)[C@@]2(C)C1)=O)(O2)[C@@]3([H])CC[C@@]4([H])[C@]5([H])C[C@@H]6[C@]([C@@]7(C)[C@@]5([H])CC[C@@]43C)(O6)[C@@H](OC(C)=O)C=CC7=O	InChI=1S/C30H40O8/c1-15(31)35-21-10-9-20(32)27(4)18-11-12-25(2)17(16(18)13-22-30(21,27)37-22)7-8-19(25)28(5)23-14-26(3,38-28)29(6,34)24(33)36-23/h9-10,16-19,21-23,34H,7-8,11-14H2,1-6H3/t16-,17-,18-,19-,21?,22+,23+,25-,26+,27-,28+,29+,30+/m0/s1	KPCOITSXXUAHRE-WEGMODHDSA-N	Acetylation of Physangulide B	2015	10.1016/j.steroids.2015.08.015	46
454	Physangulide acetonide	C31H44O8	544.304	544.685	C[C@@]([C@]1([H])OC([C@](O)(C)[C@@]2(C)C1)=O)(O2)[C@@]3([H])CC[C@@]4([H])[C@]5([H])C[C@@H]6[C@]([C@@]7(C)[C@@]5([H])CC[C@@]43C)(O6)[C@@H](OC(C)(C)O8)[C@@H]8CC7=O	InChI=1S/C31H44O8/c1-25(2)36-18-13-20(32)28(5)17-10-11-26(3)16(15(17)12-21-31(28,37-21)23(18)38-25)8-9-19(26)29(6)22-14-27(4,39-29)30(7,34)24(33)35-22/h15-19,21-23,34H,8-14H2,1-7H3/t15-,16-,17-,18-,19-,21+,22+,23-,26-,27+,28-,29+,30+,31-/m0/s1	WUABIVWJGOXGPW-DDMFMEHQSA-N	Physalis angulata	2015	10.1016/j.steroids.2015.08.015	46
455	Physangulide	C28H40O8	504.272	504.62	C[C@@]([C@]1([H])OC([C@](O)(C)[C@@]2(C)C1)=O)(O2)[C@@]3([H])CC[C@@]4([H])[C@]5([H])C[C@@H]6[C@]([C@@]7(C)[C@@]5([H])CC[C@@]43C)(O6)[C@@H](O)[C@@H](O)CC7=O	InChI=1S/C28H40O8/c1-23-9-8-15-13(10-19-28(35-19)21(31)16(29)11-18(30)25(15,28)3)14(23)6-7-17(23)26(4)20-12-24(2,36-26)27(5,33)22(32)34-20/h13-17,19-21,29,31,33H,6-12H2,1-5H3/t13-,14-,15-,16-,17-,19+,20+,21-,23-,24+,25-,26+,27+,28-/m0/s1	HKPVHGMKLFKDKW-UJGLJLALSA-N	Physalis angulata	2015	10.1016/j.steroids.2015.08.015	46	physangulide
456	Withacoagulin J	C28H36O5	452.256	452.591	O=C1[C@@]2(C)C(C=C[C@]3([H])[C@]2([H])CC[C@@]4(C)[C@@]3(O5)CC[C@@]4(O)[C@]5([C@]6([H])OC(C(C)=C(C)C6)=O)C)=CCC1	InChI=1S/C28H36O5/c1-16-15-22(32-23(30)17(16)2)26(5)28(31)14-13-27(33-26)20-10-9-18-7-6-8-21(29)25(18,4)19(20)11-12-24(27,28)3/h7,9-10,19-20,22,31H,6,8,11-15H2,1-5H3/t19-,20+,22+,24-,25-,26+,27+,28-/m0/s1	TXHLYLOSRIGTKI-NIPFBDEWSA-N	Withania coagulans Dunal	2019	10.1016/j.saa.2019.03.046	137
457	Withacogulanoside-B	C34H48O11	632.32	632.747	O=C(C[C@H](O)C1)[C@@]2(C)C1=CC[C@]3([H])[C@]2([H])CC[C@@]4(C)[C@@]3(O5)CC[C@@]4([H])[C@]5([C@]6([H])OC(C(CO[C@@]([H])([C@](O)7[H])O[C@]([H])(CO)[C@@]([H])(O)[C@@]7(O)[H])=C(C)C6)=O)C	InChI=1S/C34H48O11/c1-16-11-25(44-29(41)19(16)15-42-30-28(40)27(39)26(38)22(14-35)43-30)33(4)23-8-10-34(45-33)21-6-5-17-12-18(36)13-24(37)32(17,3)20(21)7-9-31(23,34)2/h5,18,20-23,25-28,30,35-36,38-40H,6-15H2,1-4H3/t18-,20+,21-,22-,23-,25-,26-,27+,28-,30-,31-,32+,33+,34-/m1/s1	YMSVLVXDGDFGJT-OANFNCIISA-N	Withania coagulans Dunal	2020	10.3390/biology9080197	138
458	Withaminima A	C27H34O5	438.241	438.564	O=C(C=CC1)[C@@]2(C)C1=CC[C@]3([H])[C@]2([H])C[C@]4(O)[C@@]5([H])[C@@H]([C@](C)([C@]6([H])OC(C(C)=C(C)C6)=O)O4)CC[C@@]35[H]	InChI=1S/C27H34O5/c1-14-12-22(31-24(29)15(14)2)26(4)19-11-10-18-17-9-8-16-6-5-7-21(28)25(16,3)20(17)13-27(30,32-26)23(18)19/h5,7-8,17-20,22-23,30H,6,9-13H2,1-4H3/t17-,18-,19-,20-,22+,23+,25-,26+,27+/m0/s1	GLWAAOMAECTDDV-JRVLDDIWSA-N	Physalis minima	2019	10.1016/s1875-5364(19)30054-8	139
459	Withahisolide A	C28H36O6	468.251	468.59	C[C@]([C@@]1(C)[C@H](O)O2)(O1)C[C@]2([H])[C@@H](C)C3=CC[C@@]4([H])[C@]5([H])[C@H]6[C@H](O6)[C@@]([C@@]7(C)[C@@]5([H])CC=C4C3)(O)CC=CC7=O	InChI=1S/C28H36O6/c1-14(19-13-25(2)27(4,34-25)24(30)32-19)15-7-9-17-16(12-15)8-10-18-21(17)22-23(33-22)28(31)11-5-6-20(29)26(18,28)3/h5-8,14,17-19,21-24,30-31H,9-13H2,1-4H3/t14-,17+,18-,19+,21-,22-,23-,24+,25-,26-,27+,28-/m0/s1	XTWJSPXWUZKTKO-CBMAKPIXSA-N	Physalis hispida	2014	10.1021/np400953n	140
460	Withahisolide B	C28H36O6	468.251	468.59	C[C@]([C@@]1(C)[C@H](O)O2)(O1)C[C@]2([H])[C@@H](C)C(C3)=CCC4=C3CC[C@@]5([H])[C@@]4([H])[C@H]6[C@H](O6)[C@@]([C@]75C)(O)CC=CC7=O	InChI=1S/C28H36O6/c1-14(19-13-25(2)27(4,34-25)24(30)32-19)15-7-9-17-16(12-15)8-10-18-21(17)22-23(33-22)28(31)11-5-6-20(29)26(18,28)3/h5-7,14,18-19,21-24,30-31H,8-13H2,1-4H3/t14-,18-,19+,21-,22-,23-,24+,25-,26-,27+,28-/m0/s1	SCFFGNBEBMHCST-MVFMJHTJSA-N	Physalis hispida	2014	10.1021/np400953n	140
461	Withahisolide C	C28H34O7	482.231	482.573	C[C@]([C@@]1(C)[C@H](O)O2)(O1)C[C@]2([H])[C@@H](C)C3=CC[C@]4(O5)C6=CC([C@@]([C@@]7(C)[C@@]6([H])CC[C@]45C3)(O)CC=CC7=O)=O	InChI=1S/C28H34O7/c1-15(19-14-23(2)25(4,34-23)22(31)33-19)16-7-11-28-18-12-21(30)27(32)9-5-6-20(29)24(27,3)17(18)8-10-26(28,13-16)35-28/h5-7,12,15,17,19,22,31-32H,8-11,13-14H2,1-4H3/t15-,17-,19+,22+,23-,24-,25+,26-,27-,28-/m0/s1	JFHZMJFPQYRXLJ-CNQNZRRTSA-N	Physalis hispida	2014	10.1021/np400953n	140
462	Withahisolide D	C28H34O5	450.241	450.575	C[C@]([C@@]1(C)[C@H](O)O2)(O1)C[C@]2([H])[C@@H](C)C3=CC4=C(C=C3)[C@]5([H])[C@H](O)C=C([C@@]6(C)[C@@]5([H])CC4)CC=CC6=O	InChI=1S/C28H34O5/c1-15(22-14-26(2)28(4,33-26)25(31)32-22)16-8-10-19-17(12-16)9-11-20-24(19)21(29)13-18-6-5-7-23(30)27(18,20)3/h5,7-8,10,12-13,15,20-22,24-25,29,31H,6,9,11,14H2,1-4H3/t15-,20-,21+,22+,24-,25+,26-,27-,28+/m0/s1	HFQANYIKPYWTKW-XDYYUGHDSA-N	Physalis hispida	2014	10.1021/np400953n	140
463	Withahisolide E	C26H30O5	422.209	422.521	C[C@@]12[C@]([C@@H](O3)[C@@H]3[C@]4([H])[C@]2([H])CCC5=C4C=CC([C@H](C)[C@@]6([H])C[C@@H](C)C(O6)=O)=C5)(O)CC=CC1=O	InChI=1S/C26H30O5/c1-13-11-19(30-24(13)28)14(2)15-6-8-17-16(12-15)7-9-18-21(17)22-23(31-22)26(29)10-4-5-20(27)25(18,26)3/h4-6,8,12-14,18-19,21-23,29H,7,9-11H2,1-3H3/t13-,14+,18+,19-,21+,22+,23+,25+,26+/m1/s1	BVVWAPRECDNIII-LKTAWDJGSA-N	Physalis hispida	2014	10.1021/np400953n	140
464	Withahisolide F	C28H34O6	466.236	466.574	C[C@@]12[C@]([C@@H](O3)[C@@H]3[C@]4([H])[C@]2([H])CCC5=C4C=CC([C@H](C)C(OC([H])=O)CC(C)C(C)=O)=C5)(O)CC=CC1=O	InChI=1S/C28H34O6/c1-15(17(3)30)12-22(33-14-29)16(2)18-7-9-20-19(13-18)8-10-21-24(20)25-26(34-25)28(32)11-5-6-23(31)27(21,28)4/h5-7,9,13-16,21-22,24-26,32H,8,10-12H2,1-4H3/t15?,16-,21-,22?,24-,25-,26-,27-,28-/m0/s1	BZBJAFGFMNCGBB-RYMDQAAFSA-N	Physalis hispida	2014	10.1021/np400953n	140
465	Withahisolide G	C28H36O7	484.246	484.589	OC(O1)[C@@](C)(O)[C@](C)(O)C[C@]1([H])[C@@H](C)C2=CC3=C(C=C2)[C@]4([H])[C@H]5[C@H](O5)[C@@]([C@@]6(C)[C@@]4([H])CC3)(O)CC=CC6=O	InChI=1S/C28H36O7/c1-14(19-13-25(2,31)27(4,32)24(30)34-19)15-7-9-17-16(12-15)8-10-18-21(17)22-23(35-22)28(33)11-5-6-20(29)26(18,28)3/h5-7,9,12,14,18-19,21-24,30-33H,8,10-11,13H2,1-4H3/t14-,18-,19+,21-,22-,23-,24?,25+,26-,27+,28-/m0/s1	CRNVUUUGXYHBFZ-RBVNIWDESA-N	Physalis hispida	2014	10.1021/np400953n	140
466	Withahisolide I	C28H34O7	482.231	482.573	O=C(O1)[C@@](C)(O)[C@](C)(O)C[C@]1([H])[C@@H](C)C2=CC3=C(C=C2)[C@]4([H])[C@H]5[C@H](O5)[C@@]([C@@]6(C)[C@@]4([H])CC3)(O)CC=CC6=O	InChI=1S/C28H34O7/c1-14(19-13-25(2,31)27(4,32)24(30)34-19)15-7-9-17-16(12-15)8-10-18-21(17)22-23(35-22)28(33)11-5-6-20(29)26(18,28)3/h5-7,9,12,14,18-19,21-23,31-33H,8,10-11,13H2,1-4H3/t14-,18-,19+,21-,22-,23-,25+,26-,27+,28-/m0/s1	FXAKTCYUQSZSEH-FEGKAXSMSA-N	Physalis hispida	2014	10.1021/np400953n	140
467	Salpichrolide S	C34H48O10	616.325	616.748	C[C@]1(C2)[C@](C)(O1)[C@H](O)O[C@@]2([H])[C@@H](C)C3=CC4=C(C=C3)C5C[C@H]6[C@@]7(O6)CCC[C@H](O[C@@H]([C@@H]8O)O[C@H](CO)[C@@H](O)[C@@H]8O)[C@]7(C)C5CC4	InChI=1S/C34H48O10/c1-16(22-14-31(2)33(4,44-31)30(39)41-22)17-7-9-19-18(12-17)8-10-21-20(19)13-25-34(43-25)11-5-6-24(32(21,34)3)42-29-28(38)27(37)26(36)23(15-35)40-29/h7,9,12,16,20-30,35-39H,5-6,8,10-11,13-15H2,1-4H3/t16-,20?,21?,22+,23+,24-,25-,26+,27-,28+,29-,30+,31-,32-,33+,34-/m0/s1	FHQGOCXBOGJDOQ-FZTSTMNHSA-N	Salpichroa tristis var. lehmannii	2013	10.1021/np400559p	112
468	Salpichrolide T	C28H34O6	466.236	466.574	C[C@]1(C2)[C@](C)(O1)[C@H](O)O[C@@]2([H])[C@@H](C)C3=CC4=C(C=C3)C5C[C@H]6[C@@]([C@@]7(C)C5C[C@H]4O)(O6)CC=CC7=O	InChI=1S/C28H34O6/c1-14(21-13-25(2)27(4,34-25)24(31)32-21)15-7-8-16-17-11-23-28(33-23)9-5-6-22(30)26(28,3)19(17)12-20(29)18(16)10-15/h5-8,10,14,17,19-21,23-24,29,31H,9,11-13H2,1-4H3/t14-,17?,19?,20+,21+,23-,24+,25-,26-,27+,28-/m0/s1	QVVMOPIONXCBOF-GBEWYRGESA-N	Salpichroa tristis var. lehmannii	2013	10.1021/np400559p	112
469	Salpichrolide U	C25H30O4	394.214	394.511	CC(C[C@@H](O)[C@@H](C)C1=CC2=C(C=C1)C3C[C@H]4[C@@]([C@@]5(C)C3CC2)(O4)CC=CC5=O)=O	InChI=1S/C25H30O4/c1-14(26)11-21(27)15(2)16-6-8-18-17(12-16)7-9-20-19(18)13-23-25(29-23)10-4-5-22(28)24(20,25)3/h4-6,8,12,15,19-21,23,27H,7,9-11,13H2,1-3H3/t15-,19?,20?,21+,23-,24-,25-/m0/s1	AUIHFZLFRCLGQE-NOBLIVSGSA-N	Salpichroa tristis var. lehmannii	2013	10.1021/np400559p	112
470	Salpichrolide V	C28H35ClO5	486.217	487.033	O=C1[C@@]2(C)[C@]([C@H](Cl)C[C@]3([H])[C@]2([H])CCC4=C3C=CC([C@H](C)[C@@]5([H])C[C@@](O6)(C)[C@@]6(C)[C@H](O)O5)=C4)(O)CC=C1	InChI=1S/C28H35ClO5/c1-15(21-14-25(2)27(4,34-25)24(31)33-21)16-7-9-18-17(12-16)8-10-20-19(18)13-22(29)28(32)11-5-6-23(30)26(20,28)3/h5-7,9,12,15,19-22,24,31-32H,8,10-11,13-14H2,1-4H3/t15-,19-,20-,21+,22+,24+,25-,26-,27+,28-/m0/s1	KRJABWDWNQMZCY-JRAXBIGVSA-N	Salpichroa scandens	2017	10.1002/cbdv.201700118	141
471	Nicanlode A	C35H39NO7	585.273	585.697	O=C1[C@@]2(C)[C@]([C@@H](O3)[C@@H]3[C@]4([H])[C@]2([H])CCC5=C4C=CC([C@H](C)[C@@]6([H])C[C@@](O7)(C)[C@@]7(C)[C@H](NC8=C(C(O)=O)C=CC=C8)O6)=C5)(O)CC=C1	InChI=1S/C35H39NO7/c1-18(25-17-32(2)34(4,43-32)31(41-25)36-24-9-6-5-8-22(24)30(38)39)19-11-13-21-20(16-19)12-14-23-27(21)28-29(42-28)35(40)15-7-10-26(37)33(23,35)3/h5-11,13,16,18,23,25,27-29,31,36,40H,12,14-15,17H2,1-4H3,(H,38,39)/t18-,23-,25+,27-,28-,29-,31+,32-,33-,34+,35-/m0/s1	QQNWUFKAJRQUHZ-JYSPEJNMSA-N	Nicandra physalodes	2017	10.1016/j.phytochem.2017.02.009	105
472	Nicanlode B	C35H39NO8	601.268	601.696	O=C1[C@@]2(C)[C@]([C@@H](O3)[C@@H]3[C@]4([H])[C@]2([H])CCC5=C4C=CC([C@H](C)[C@@]6([H])C[C@@](O7)(C)[C@@]7(C)[C@H](NC8=C(O)C=C(C(O)=O)C=C8)O6)=C5)(O)CC=C1	InChI=1S/C35H39NO8/c1-17(25-16-32(2)34(4,44-32)31(42-25)36-23-12-9-20(30(39)40)15-24(23)37)18-7-10-21-19(14-18)8-11-22-27(21)28-29(43-28)35(41)13-5-6-26(38)33(22,35)3/h5-7,9-10,12,14-15,17,22,25,27-29,31,36-37,41H,8,11,13,16H2,1-4H3,(H,39,40)/t17-,22-,25+,27-,28-,29-,31+,32-,33-,34+,35-/m0/s1	DNLMAAYSVMTMSD-FIRJRFMJSA-N	Nicandra physalodes	2017	10.1016/j.phytochem.2017.02.009	105
473	Nicanlode C	C28H32O7	480.215	480.557	O=C1[C@@]2(C)[C@]([C@@H](O3)[C@@H]3[C@](C4=C5C=C([C@H](C)[C@@]6([H])C[C@@](O7)(C)[C@@]7(C)[C@H](O)O6)C=C4)([H])[C@]2([H])CC5=O)(O)CC=C1	InChI=1S/C28H32O7/c1-13(19-12-25(2)27(4,35-25)24(31)33-19)14-7-8-15-16(10-14)18(29)11-17-21(15)22-23(34-22)28(32)9-5-6-20(30)26(17,28)3/h5-8,10,13,17,19,21-24,31-32H,9,11-12H2,1-4H3/t13-,17-,19+,21-,22-,23-,24+,25-,26-,27+,28-/m0/s1	DGLIMFQJDBCHIY-VYHVJIRBSA-N	Nicandra physalodes	2017	10.1016/j.phytochem.2017.02.009	105
474	Nicanlode D	C28H36O6	468.251	468.59	O[C@@H]1[C@@]2(C)[C@]([C@@H](O3)[C@@H]3[C@]4([H])[C@]2([H])CCC5=C4C=CC([C@H](C)[C@@]6([H])C[C@@](O7)(C)[C@@]7(C)[C@H](O)O6)=C5)(O)CC=C1	InChI=1S/C28H36O6/c1-14(19-13-25(2)27(4,34-25)24(30)32-19)15-7-9-17-16(12-15)8-10-18-21(17)22-23(33-22)28(31)11-5-6-20(29)26(18,28)3/h5-7,9,12,14,18-24,29-31H,8,10-11,13H2,1-4H3/t14-,18-,19+,20-,21-,22-,23-,24+,25-,26-,27+,28-/m0/s1	JFSUDALNLCBOEE-YUFJZWBFSA-N	Nicandra physalodes	2017	10.1016/j.phytochem.2017.02.009	105
475	Nicanlode E	C28H34O5	450.241	450.575	O=C1[C@@]2(C)[C@](C=C[C@]3([H])[C@]2([H])CCC4=C3C=CC([C@H](C)[C@@]5([H])C[C@@](O6)(C)[C@@]6(C)[C@H](O)O5)=C4)(O)CC=C1	InChI=1S/C28H34O5/c1-16(22-15-25(2)27(4,33-25)24(30)32-22)17-7-9-19-18(14-17)8-10-21-20(19)11-13-28(31)12-5-6-23(29)26(21,28)3/h5-7,9,11,13-14,16,20-22,24,30-31H,8,10,12,15H2,1-4H3/t16-,20-,21-,22+,24+,25-,26-,27+,28-/m0/s1	AKRBQWBXQQCASU-DXOSLAAFSA-N	Nicandra physalodes	2017	10.1016/j.phytochem.2017.02.009	105
476	Nicanlode F	C28H34O6	466.236	466.574	O=C1[C@@]2(C)[C@]([C@@H]3[C@@H](O)[C@]4([H])[C@]2([H])CCC5=C4C=CC([C@H](C)[C@@]6([H])C[C@@](O7)(C)[C@@]7(C)[C@H](O)O6)=C5)(O3)CC=C1	InChI=1S/C28H34O6/c1-14(19-13-25(2)27(4,34-25)24(31)32-19)15-7-9-17-16(12-15)8-10-18-21(17)22(30)23-28(33-23)11-5-6-20(29)26(18,28)3/h5-7,9,12,14,18-19,21-24,30-31H,8,10-11,13H2,1-4H3/t14-,18-,19+,21-,22-,23-,24+,25-,26-,27+,28-/m0/s1	FUMSLAZTZDHXSN-MVFMJHTJSA-N	Nicandra physalodes	2017	10.1016/j.phytochem.2017.02.009	105
477	Nicandrenone methyl ether	C29H36O6	480.251	480.601	O=C1[C@@]2(C)[C@]([C@@H](O3)[C@@H]3[C@]4([H])[C@]2([H])CCC5=C4C=CC([C@H](C)[C@@]6([H])C[C@@](O7)(C)[C@@]7(C)[C@H](OC)O6)=C5)(O)CC=C1	InChI=1S/C29H36O6/c1-15(20-14-26(2)28(4,35-26)25(32-5)33-20)16-8-10-18-17(13-16)9-11-19-22(18)23-24(34-23)29(31)12-6-7-21(30)27(19,29)3/h6-8,10,13,15,19-20,22-25,31H,9,11-12,14H2,1-5H3/t15-,19-,20+,22-,23-,24-,25?,26-,27-,28+,29-/m0/s1	WUGPHZRSDUNDII-DWRXZNGHSA-N	Nicandra physalodes	2012	10.3724 /SP.J.1143.2012.11086	142
478	26S-Nicandrenone methyl ether	C29H36O6	480.251	480.601	O=C1[C@@]2(C)[C@]([C@@H](O3)[C@@H]3[C@]4([H])[C@]2([H])CCC5=C4C=CC([C@H](C)[C@@]6([H])C[C@@](O7)(C)[C@@]7(C)[C@@H](OC)O6)=C5)(O)CC=C1	InChI=1S/C29H36O6/c1-15(20-14-26(2)28(4,35-26)25(32-5)33-20)16-8-10-18-17(13-16)9-11-19-22(18)23-24(34-23)29(31)12-6-7-21(30)27(19,29)3/h6-8,10,13,15,19-20,22-25,31H,9,11-12,14H2,1-5H3/t15-,19-,20+,22-,23-,24-,25?,26-,27-,28+,29-/m0/s1	WUGPHZRSDUNDII-DWRXZNGHSA-N	Nicandra physalodes	2012	10.3724 /SP.J.1143.2012.11086	142
479	(20S,22R,24R,25S,26S/R)-22,26-Epoxy-5α,6β,24,25,26-pentahydroxy-17(13 → 18)-abeo-ergost-2,7,13,15,17-tetraen-1-one	C28H36O7	484.246	484.589	O=C1[C@@]2(C)[C@]([C@H](O)C=C3[C@]2([H])CCC4=C3C=CC([C@H](C)[C@@]5([H])C[C@@](C)(O)[C@](C)(O)C(O)O5)=C4)(O)CC=C1	InChI=1S/C28H36O7/c1-15(21-14-25(2,32)27(4,33)24(31)35-21)16-7-9-18-17(12-16)8-10-20-19(18)13-23(30)28(34)11-5-6-22(29)26(20,28)3/h5-7,9,12-13,15,20-21,23-24,30-34H,8,10-11,14H2,1-4H3/t15-,20-,21+,23+,24?,25+,26-,27+,28-/m0/s1	KBRJJUXFMBCLEE-YKOXVCQSSA-N	Nicandra physaloides	2018	10.1016/j.jff.2017.10.043	107
480	(20S,22R,24S,25S,26S/R)-24,25:22,26-Diepoxy-5α,6β,26-trihydroxy-17(13 → 18)-abeo-ergost-2,7,13,15,17-tetraen-1-one	C28H34O6	466.236	466.574	O=C1[C@@]2(C)[C@]([C@H](O)C=C3[C@]2([H])CCC4=C3C=CC([C@H](C)[C@@]5([H])C[C@@](O6)(C)[C@@]6(C)C(O)O5)=C4)(O)CC=C1	InChI=1S/C28H34O6/c1-15(21-14-25(2)27(4,34-25)24(31)33-21)16-7-9-18-17(12-16)8-10-20-19(18)13-23(30)28(32)11-5-6-22(29)26(20,28)3/h5-7,9,12-13,15,20-21,23-24,30-32H,8,10-11,14H2,1-4H3/t15-,20-,21+,23+,24?,25-,26-,27+,28-/m0/s1	FPZUGMSPKDUSAI-MTJUOQAWSA-N	Nicandra physaloides	2018	10.1016/j.jff.2017.10.043	107
481	(20S,22R,24R,25S,26S/R)-25-Ethyoxyl-6α,7α:22,26-diepoxy-5α,24,26- trihydroxy-17(13 → 18)-abeo-ergost-2,13,15,17-tetraen-1-one	C30H40O7	512.277	512.643	O=C1[C@@]2(C)[C@]([C@@H](O3)[C@@H]3[C@]4([H])[C@]2([H])CCC5=C4C=CC([C@H](C)[C@@]6([H])C[C@@](C)(O)[C@](C)(OCC)C(O)O6)=C5)(O)CC=C1	InChI=1S/C30H40O7/c1-6-35-29(5)26(32)36-21(15-27(29,3)33)16(2)17-9-11-19-18(14-17)10-12-20-23(19)24-25(37-24)30(34)13-7-8-22(31)28(20,30)4/h7-9,11,14,16,20-21,23-26,32-34H,6,10,12-13,15H2,1-5H3/t16-,20-,21+,23-,24-,25-,26?,27+,28-,29?,30-/m0/s1	QGEAZPKRSYJHCC-HXHZGQFYSA-N	Nicandra physaloides	2018	10.1016/j.jff.2017.10.043	107
482	(20S,22R,24R,25S,26S)-6α,7α:22,26-Diepoxy-5α,24,25,26-tetrahydroxy-17(13 → 18)-abeo-ergost-2,13,15,17-tetraen-1,12-dione	C28H34O8	498.225	498.572	O=C1[C@@]2(C)[C@]([C@@H](O3)[C@@H]3[C@](C4=C5C=C([C@H](C)[C@@]6([H])C[C@@](C)(O)[C@](C)(O)C(O)O6)C=C4)([H])[C@]2([H])CC5=O)(O)CC=C1	InChI=1S/C28H34O8/c1-13(19-12-25(2,32)27(4,33)24(31)35-19)14-7-8-15-16(10-14)18(29)11-17-21(15)22-23(36-22)28(34)9-5-6-20(30)26(17,28)3/h5-8,10,13,17,19,21-24,31-34H,9,11-12H2,1-4H3/t13-,17-,19+,21-,22-,23-,24?,25+,26-,27+,28-/m0/s1	XCGVYUKGDVDZQJ-ZGXODVFJSA-N	Nicandra physaloides	2018	10.1016/j.jff.2017.10.043	107
483	Withalongolide K	C33H46O10	602.309	602.721	OC1=CC=CC2=C1[C@]3([H])[C@@]([C@@](CC[C@]4([H])[C@@H]([C@]5([H])OC(C(C)=C(CO[C@@]([H])([C@](O)6[H])O[C@]([H])(CO)[C@@]([H])(O)[C@@]6(O)[H])C5)=O)C)([H])[C@]4(C)CC3)([H])C[C@@H]2O	InChI=1S/C33H46O10/c1-15-17(14-41-32-30(39)29(38)28(37)26(13-34)43-32)11-25(42-31(15)40)16(2)21-7-8-22-20-12-24(36)19-5-4-6-23(35)27(19)18(20)9-10-33(21,22)3/h4-6,16,18,20-22,24-26,28-30,32,34-39H,7-14H2,1-3H3/t16-,18-,20+,21+,22-,24-,25+,26+,28+,29-,30+,32+,33+/m0/s1	QYYMGJGFQVRKJA-RMHZGSCISA-N	Physalis longifolia	2011	10.1021/np200635r	38
484	Physangulidine A	C28H36O8	500.241	500.588	O=C1[C@@]2(C)[C@@]([C@H]3[C@@H]4[C@]5([H])[C@]2([H])CC[C@@H](C)[C@]5(CC6)O[C@]6([C@@]7(O)[C@H](O8)C[C@](O)(C)[C@](C7)(C)C8=O)O4)(O3)CC=C1	InChI=1S/C28H36O8/c1-14-7-8-15-18-19(20-27(35-20)9-5-6-16(29)24(15,27)4)34-28(11-10-25(14,18)36-28)26(32)13-22(2)21(30)33-17(26)12-23(22,3)31/h5-6,14-15,17-20,31-32H,7-13H2,1-4H3/t14-,15+,17-,18+,19+,20-,22+,23-,24+,25+,26+,27-,28-/m1/s1	LJQMXQFAKQTMLT-PXCQMZFESA-N	Physalis angulata L.	2012	10.1021/ol203498a	143
485	Physangulidine B	C28H36O8	500.241	500.588	O=C1[C@@]2(C)[C@@]([C@H]3[C@@H]4[C@]5([H])[C@]2([H])CC[C@](O)(C)[C@]5(CC6)O[C@]6([C@@]7([H])[C@H](O8)C[C@](O)(C)[C@](C7)(C)C8=O)O4)(O3)CC=C1	InChI=1S/C28H36O8/c1-22-12-15(16(33-21(22)30)13-24(22,3)32)28-11-10-26(36-28)18-14(7-9-23(26,2)31)25(4)17(29)6-5-8-27(25)20(35-27)19(18)34-28/h5-6,14-16,18-20,31-32H,7-13H2,1-4H3/t14-,15+,16+,18-,19-,20+,22-,23+,24+,25-,26+,27+,28+/m0/s1	GFFPJYAMOUBGIL-QDIBAVOHSA-N	Physalis angulata L.	2012	10.1021/ol203498a	143
486	Physangulidine C	C28H36O8	500.241	500.588	O=C1[C@@]2(C)[C@@]([C@H]3[C@@H]4[C@]5([H])[C@]2([H])CC[C@@](O)(C)[C@]5(CC6)O[C@]6([C@@]7([H])[C@H](O8)C[C@](O)(C)[C@](C7)(C)C8=O)O4)(O3)CC=C1	InChI=1S/C28H36O8/c1-22-12-15(16(33-21(22)30)13-24(22,3)32)28-11-10-26(36-28)18-14(7-9-23(26,2)31)25(4)17(29)6-5-8-27(25)20(35-27)19(18)34-28/h5-6,14-16,18-20,31-32H,7-13H2,1-4H3/t14-,15+,16+,18-,19-,20+,22-,23-,24+,25-,26+,27+,28+/m0/s1	GFFPJYAMOUBGIL-YKZGADRXSA-N	Physalis angulata L.	2012	10.1021/ol203498a	143
487	Physangulidine D	C28H36O7	484.246	484.589	O=C(C=CC1)[C@@]2(C)C1=C[C@@H]3C4C2CC[C@](C)(O)[C@]4(CC5)O[C@]5([C@H]6C(O7)C[C@](O)(C)[C@@](C6)(C)C7=O)O3	InChI=1S/C28H36O7/c1-23-13-17(19(33-22(23)30)14-25(23,3)32)28-11-10-27(35-28)21-16(8-9-24(27,2)31)26(4)15(12-18(21)34-28)6-5-7-20(26)29/h5,7,12,16-19,21,31-32H,6,8-11,13-14H2,1-4H3/t16?,17-,18-,19?,21?,23-,24+,25-,26+,27-,28-/m1/s1	YARZHJIJMVBFOR-HCECQQDPSA-N	Deprea zamorae	2015	10.1016/j.phytochem.2014.11.015	131
488	Physangulidine E	C28H36O7	484.246	484.589	O=C(CC=C1)[C@@]2(C)C1=C[C@@H]3C4C2CC[C@](C)(O)[C@]4(CC5)O[C@]5([C@H]6C(O7)C[C@](O)(C)[C@@](C6)(C)C7=O)O3	InChI=1S/C28H36O7/c1-23-13-17(19(33-22(23)30)14-25(23,3)32)28-11-10-27(35-28)21-16(8-9-24(27,2)31)26(4)15(12-18(21)34-28)6-5-7-20(26)29/h5-6,12,16-19,21,31-32H,7-11,13-14H2,1-4H3/t16?,17-,18-,19?,21?,23-,24+,25-,26+,27-,28-/m1/s1	AXLMWXRVVHEBDA-HCECQQDPSA-N	Deprea zamorae	2015	10.1016/j.phytochem.2014.11.015	131
489	Physangulidine F	C28H36O8	500.241	500.588	O=C1[C@@]2(C)C([C@H](O)[C@@H]3C4C2CC[C@](C)(O)[C@]4(CC5)O[C@]5([C@H]6C(O7)C[C@](O)(C)[C@@](C6)(C)C7=O)O3)=CC=C1	InChI=1S/C28H36O8/c1-23-12-16(17(34-22(23)31)13-25(23,3)33)28-11-10-27(36-28)19-14(8-9-24(27,2)32)26(4)15(6-5-7-18(26)29)20(30)21(19)35-28/h5-7,14,16-17,19-21,30,32-33H,8-13H2,1-4H3/t14?,16-,17?,19?,20+,21+,23-,24+,25-,26-,27-,28-/m1/s1	DSZCIYZQRFEZTO-LQJYUBMLSA-N	Deprea zamorae	2015	10.1016/j.phytochem.2014.11.015	131
490	Physangulidine G	C28H36O10	532.231	532.586	O=C1[C@@]2(C)[C@]3([C@H](O)[C@@H]4C5C2CC[C@](C)(O)[C@]5(CC6)O[C@]6([C@H]7C(O8)C[C@](O)(C)[C@@](C7)(C)C8=O)O4)C=C[C@H]1OO3	InChI=1S/C28H36O10/c1-22-11-14(16(34-21(22)31)12-24(22,3)33)28-10-9-26(37-28)17-13(5-7-23(26,2)32)25(4)19(29)15-6-8-27(25,38-36-15)20(30)18(17)35-28/h6,8,13-18,20,30,32-33H,5,7,9-12H2,1-4H3/t13?,14-,15-,16?,17?,18+,20-,22-,23+,24-,25+,26-,27-,28-/m1/s1	VMNVHBPUZAPTRI-YQCNSRQOSA-N	Deprea zamorae	2015	10.1016/j.phytochem.2014.11.015	131
491	Physangulidine H	C28H36O9	516.236	516.587	O=C1[C@@]2(C)[C@]3([C@H](O)[C@@H]4C5C2CC[C@](C)(O)[C@]5(CC6)O[C@]6([C@H]7C(O8)C[C@](O)(C)[C@@](C7)(C)C8=O)O4)[C@@H](O3)C=C1	InChI=1S/C28H36O9/c1-22-11-14(15(34-21(22)31)12-24(22,3)33)27-10-9-26(37-27)18-13(7-8-23(26,2)32)25(4)16(29)5-6-17-28(25,35-17)20(30)19(18)36-27/h5-6,13-15,17-20,30,32-33H,7-12H2,1-4H3/t13?,14-,15?,17+,18?,19+,20-,22-,23+,24-,25+,26-,27-,28-/m1/s1	AXZOBQUWNKLVDS-HPFNLNMKSA-N	Deprea zamorae	2015	10.1016/j.phytochem.2014.11.015	131
492	Nicphysatone A	C28H40O7	488.277	488.621	O=C1[C@@]2(C)[C@]([C@@H](O3)[C@@H]3C4C2CC[C@H](C)C4CC[C@]5(O)[C@@H](C)[C@H]6C[C@@](O7)(C)[C@@]7(C)[C@H](O6)O5)(O)CC=C1	InChI=1S/C28H40O7/c1-14-8-9-17-20(21-22(33-21)27(30)11-6-7-19(29)25(17,27)4)16(14)10-12-28(31)15(2)18-13-24(3)26(5,35-24)23(32-18)34-28/h6-7,14-18,20-23,30-31H,8-13H2,1-5H3/t14-,15-,16?,17?,18+,20?,21-,22-,23+,24-,25-,26+,27-,28+/m0/s1	QFBZDSFMYGPKKP-MRDNCKJDSA-N	Nicandra physaloides	2018	10.1016/j.steroids.2018.01.003	144
493	Paraminabeolide C	C30H42O6	498.298	498.66	[H][C@]12[C@@]([C@]([H])(CC[C@]3([H])[C@H](C)[C@H](O)[C@@H]4OC([C@H](C)[C@@H]4C)=O)[C@]3(COC(C)=O)CC2)([H])CCC5=CC(C=C[C@@]51C)=O	InChI=1S/C30H42O6/c1-16-17(2)28(34)36-27(16)26(33)18(3)23-8-9-25-22-7-6-20-14-21(32)10-12-29(20,5)24(22)11-13-30(23,25)15-35-19(4)31/h10,12,14,16-18,22-27,33H,6-9,11,13,15H2,1-5H3/t16-,17+,18-,22+,23+,24-,25-,26-,27+,29-,30-/m0/s1	CFLDASSGYNALJR-OUGNOYQBSA-N	Paraminabea acronocephala	2011	10.1021/np2000705	53
494	Paraminabeolide D	C28H40O4	440.293	440.624	[H][C@]12[C@@]([C@]([H])(CC[C@]3([H])[C@H](C)[C@H](O)[C@@H]4OC([C@H](C)[C@@H]4C)=O)[C@]3(C)CC2)([H])CCC5=CC(C=C[C@@]51C)=O	InChI=1S/C28H40O4/c1-15-16(2)26(31)32-25(15)24(30)17(3)21-8-9-22-20-7-6-18-14-19(29)10-12-27(18,4)23(20)11-13-28(21,22)5/h10,12,14-17,20-25,30H,6-9,11,13H2,1-5H3/t15-,16+,17-,20-,21+,22-,23-,24-,25+,27-,28+/m0/s1	UISXVQNCBCKQHL-PPGQKZPJSA-N	Paraminabea acronocephala	2011	10.1021/np2000705	53
495	Paraminabeolide E	C28H40O4	440.293	440.624	[H][C@]12[C@@]([C@]([H])(CC[C@]3([H])[C@H](C)[C@H](O)[C@@H]4OC([C@@H](C)[C@@H]4C)=O)[C@]3(C)CC2)([H])CCC5=CC(C=C[C@@]51C)=O	InChI=1S/C28H40O4/c1-15-16(2)26(31)32-25(15)24(30)17(3)21-8-9-22-20-7-6-18-14-19(29)10-12-27(18,4)23(20)11-13-28(21,22)5/h10,12,14-17,20-25,30H,6-9,11,13H2,1-5H3/t15-,16-,17-,20-,21+,22-,23-,24-,25+,27-,28+/m0/s1	UISXVQNCBCKQHL-RKXKHITBSA-N	Paraminabea acronocephala	2011	10.1021/np2000705	53
496	Paraminabeolide F	C28H36O5	452.256	452.591	[H][C@]12[C@@]([C@]([H])(CC[C@@]34[H])[C@]3(C(O[C@H]([C@@H]5OC([C@H](C)[C@H]5C)=O)[C@H]4C)=O)CC2)([H])CCC6=CC(C=C[C@@]61C)=O	InChI=1S/C28H36O5/c1-14-15(2)25(30)32-23(14)24-16(3)20-7-8-22-19-6-5-17-13-18(29)9-11-27(17,4)21(19)10-12-28(20,22)26(31)33-24/h9,11,13-16,19-24H,5-8,10,12H2,1-4H3/t14-,15-,16+,19-,20-,21+,22+,23-,24+,27+,28+/m1/s1	CSYZCEMSEOUURJ-NQRURKCISA-N	Paraminabea acronocephala	2011	10.1021/np2000705	53
497	Sinubrasolide A	C28H38O4	438.277	438.608	O=C1C=C[C@@]2(C)C(CC[C@]3([H])[C@]2([H])CC[C@@]4(C)[C@@]3([H])C[C@H]5[C@]4([H])[C@H](C)[C@H]([C@]6([H])[C@H](C)[C@H](C)C(O6)=O)O5)=C1	InChI=1S/C28H38O4/c1-14-15(2)26(30)32-24(14)25-16(3)23-22(31-25)13-21-19-7-6-17-12-18(29)8-10-27(17,4)20(19)9-11-28(21,23)5/h8,10,12,14-16,19-25H,6-7,9,11,13H2,1-5H3/t14-,15+,16+,19-,20+,21+,22+,23+,24+,25-,27+,28+/m1/s1	JCDWJZKYFNMRNW-XXXHITNPSA-N	Sinularia brassica	2013	10.1021/np400454q	145
498	Sinubrasolide B	C28H38O4	438.277	438.608	O=C1C=C[C@@]2(C)C(CC[C@]3([H])[C@]2([H])CC[C@@]4(C)[C@@]3([H])C[C@H]5[C@]4([H])[C@H](C)[C@H]([C@]6([H])[C@H](C)[C@@H](C)C(O6)=O)O5)=C1	InChI=1S/C28H38O4/c1-14-15(2)26(30)32-24(14)25-16(3)23-22(31-25)13-21-19-7-6-17-12-18(29)8-10-27(17,4)20(19)9-11-28(21,23)5/h8,10,12,14-16,19-25H,6-7,9,11,13H2,1-5H3/t14-,15-,16+,19-,20+,21+,22+,23+,24+,25-,27+,28+/m1/s1	JCDWJZKYFNMRNW-AHYGXKIUSA-N	Sinularia brassica	2013	10.1021/np400454q	145
499	Sinubrasolide C	C28H38O5	454.272	454.607	O=C1C=C[C@@]2(C)C(CC[C@]3([H])[C@]2([H])CC[C@@]4(C)[C@@]3([H])C[C@H]5[C@]4([H])[C@H](C)[C@]([C@]6([H])[C@H](C)[C@H](C)C(O6)=O)(O)O5)=C1	InChI=1S/C28H38O5/c1-14-15(2)25(30)32-24(14)28(31)16(3)23-22(33-28)13-21-19-7-6-17-12-18(29)8-10-26(17,4)20(19)9-11-27(21,23)5/h8,10,12,14-16,19-24,31H,6-7,9,11,13H2,1-5H3/t14-,15+,16+,19-,20+,21+,22+,23+,24+,26+,27+,28+/m1/s1	WMHYWWYFDIMEQK-QYYNZKLTSA-N	Sinularia brassica	2013	10.1021/np400454q	145
500	Sinubrasolide J	C28H38O5	454.272	454.607	[H][C@]12[C@@]([C@@](C[C@H]3[C@]4([H])[C@H](C)[C@]([C@@]5([H])[C@H](C)[C@@H](C)C(O5)=O)(O)O3)([H])[C@]4(C)CC2)([H])CCC6=CC(C=C[C@@]61C)=O	InChI=1S/C28H38O5/c1-14-15(2)25(30)32-24(14)28(31)16(3)23-22(33-28)13-21-19-7-6-17-12-18(29)8-10-26(17,4)20(19)9-11-27(21,23)5/h8,10,12,14-16,19-24,31H,6-7,9,11,13H2,1-5H3/t14-,15-,16+,19-,20+,21+,22+,23+,24-,26+,27+,28+/m1/s1	WMHYWWYFDIMEQK-OWVZXLGJSA-N	Sinularia brassica	2017	10.1016/j.bmcl.2017.06.029	146
501	4-Deoxyixocarpalactone A	C28H40O7	488.277	488.621	[H][C@]12[C@@]([C@]([H])(C[C@H](O)[C@]3([H])[C@](O)(C)[C@@H](O)[C@@H]4OC([C@H](C)[C@H]4C)=O)[C@]3(C)CC2)([H])C[C@@H]5[C@]([C@]61C)(O5)CC=CC6=O	InChI=1S/C28H40O7/c1-13-14(2)24(32)34-21(13)23(31)27(5,33)22-18(29)12-17-15-11-20-28(35-20)9-6-7-19(30)26(28,4)16(15)8-10-25(17,22)3/h6-7,13-18,20-23,29,31,33H,8-12H2,1-5H3/t13-,14-,15-,16+,17+,18+,20-,21-,22+,23+,25+,26+,27-,28-/m1/s1	BSGYNTZSGDCYJU-SEUHVEIZSA-N	Physalis philadelphica	2018	10.1016/j.phytochem.2018.04.018	44
502	Sinubrasolide E	C28H38O5	454.272	454.607	O=C1C=C[C@@]2(C)C(CC[C@]3([H])[C@]2([H])CC[C@@]4(C)[C@@]3([H])C[C@H]5[C@]4([H])[C@H](C)[C@H](O)[C@@]6(OC([C@@H](C)[C@H]6C)=O)O5)=C1	InChI=1S/C28H38O5/c1-14-16(3)28(33-25(14)31)24(30)15(2)23-22(32-28)13-21-19-7-6-17-12-18(29)8-10-26(17,4)20(19)9-11-27(21,23)5/h8,10,12,14-16,19-24,30H,6-7,9,11,13H2,1-5H3/t14-,15-,16+,19+,20-,21-,22-,23-,24-,26-,27-,28+/m0/s1	JJXDFSOHRJHKGE-HWZWBGIFSA-N	Sinularia brassica	2013	10.1021/np400454q	145
503	Sinubrasolide F	C30H40O6	496.283	496.644	O=C1C=C[C@@]2(C)C(CC[C@]3([H])[C@]2([H])CC[C@@]4(C)[C@@]3([H])C[C@H]5[C@]4([H])[C@H](C)[C@H](OC(C)=O)[C@@]6(OC([C@@H](C)[C@H]6C)=O)O5)=C1	InChI=1S/C30H40O6/c1-15-17(3)30(36-27(15)33)26(34-18(4)31)16(2)25-24(35-30)14-23-21-8-7-19-13-20(32)9-11-28(19,5)22(21)10-12-29(23,25)6/h9,11,13,15-17,21-26H,7-8,10,12,14H2,1-6H3/t15-,16-,17+,21+,22-,23-,24-,25-,26?,28-,29-,30+/m0/s1	GHGAUOFSOCIDAM-XARRESLYSA-N	Sinularia brassica	2013	10.1021/np400454q	145
504	Sinubrasolide H	C28H38O5	454.272	454.607	[H][C@]12[C@@]([C@@](C[C@H]3[C@]4([H])[C@H](C)[C@H](O)[C@@]5(OC([C@H](C)[C@H]5C)=O)O3)([H])[C@]4(C)CC2)([H])CCC6=CC(C=C[C@@]61C)=O	InChI=1S/C28H38O5/c1-14-16(3)28(33-25(14)31)24(30)15(2)23-22(32-28)13-21-19-7-6-17-12-18(29)8-10-26(17,4)20(19)9-11-27(21,23)5/h8,10,12,14-16,19-24,30H,6-7,9,11,13H2,1-5H3/t14-,15+,16-,19-,20+,21+,22+,23+,24+,26+,27+,28-/m1/s1	JJXDFSOHRJHKGE-MGGSVIRBSA-N	Sinularia brassica	2017	10.1016/j.bmcl.2017.06.029	146
505	Sinubrasolide I	C28H36O5	452.256	452.591	[H][C@]12[C@@]([C@@](C[C@H](O[C@]34OC([C@H](C)[C@H]4C)=O)[C@]5([H])[C@H](C)C3=O)([H])[C@]5(C)CC2)([H])CCC6=CC(C=C[C@@]61C)=O	InChI=1S/C28H36O5/c1-14-16(3)28(33-25(14)31)24(30)15(2)23-22(32-28)13-21-19-7-6-17-12-18(29)8-10-26(17,4)20(19)9-11-27(21,23)5/h8,10,12,14-16,19-23H,6-7,9,11,13H2,1-5H3/t14-,15+,16-,19-,20+,21+,22+,23+,26+,27+,28-/m1/s1	SPIGTURQZFHCFQ-VIXRJSHISA-N	Sinularia brassica	2017	10.1016/j.bmcl.2017.06.029	146
506	Sinubrasolide K	C28H38O5	454.272	454.607	[H][C@]12[C@@]([C@@](C[C@H]3[C@]4([H])[C@H](C)[C@H](O)[C@]5(OC([C@@H](C)[C@H]5C)=O)O3)([H])[C@]4(C)CC2)([H])CCC6=CC(C=C[C@@]61C)=O	InChI=1S/C28H38O5/c1-14-16(3)28(33-25(14)31)24(30)15(2)23-22(32-28)13-21-19-7-6-17-12-18(29)8-10-26(17,4)20(19)9-11-27(21,23)5/h8,10,12,14-16,19-24,30H,6-7,9,11,13H2,1-5H3/t14-,15-,16+,19+,20-,21-,22-,23-,24-,26-,27-,28-/m0/s1	JJXDFSOHRJHKGE-SEXHSVSSSA-N	Sinularia brassica	2017	10.1016/j.bmcl.2017.06.029	146
507	Ixocarpalactone L	C28H40O9	520.267	520.619	O=C1[C@@]2(C)[C@@]([C@@H](O)C[C@]3([H])[C@]2([H])CC[C@@]4(C)[C@@]3([H])C[C@H]5[C@]4([H])[C@](O)(C)[C@H](O)C6(OC([C@H](C)[C@H]6C)=O)O5)(O)[C@H](O)C=C1	InChI=1S/C28H40O9/c1-12-13(2)28(37-22(12)32)23(33)26(5,34)21-17(36-28)11-16-14-10-20(31)27(35)19(30)7-6-18(29)25(27,4)15(14)8-9-24(16,21)3/h6-7,12-17,19-21,23,30-31,33-35H,8-11H2,1-5H3/t12-,13-,14-,15+,16+,17+,19-,20+,21+,23+,24+,25+,26-,27-,28?/m1/s1	UTZOETQNXLJIPT-TVWVUEKHSA-N	Nicandra physaloides	2018	10.1016/j.fitote.2018.11.003	155
508	Jaborosalactone 471	C28H32O9	512.205	512.555	O=C(C[C@H]1O[C@H]2CC3C4C[C@@]5(O)[C@@]6(C)C3CCC6=C(CO)C([C@]57OC(C(C)=C7C)=O)=O)[C@@]4(C)[C@@]2(O)C1=O	InChI=1S/C28H32O9/c1-11-12(2)28(37-23(11)33)21(31)14(10-29)16-6-5-15-13-7-20-27(35)22(32)18(36-20)8-19(30)25(27,4)17(13)9-26(28,34)24(15,16)3/h13,15,17-18,20,29,34-35H,5-10H2,1-4H3/t13?,15?,17?,18-,20+,24+,25+,26-,27+,28+/m1/s1	OIHHJBDQHBFENV-HHICCLDISA-N	Jaborosa runcinata Lam	2014	10.1016/j.ejmech.2014.05.045	147	Jaborosalactone 47
509	Jaborosalactone 481	C28H38O8	502.257	502.604	O=C1[C@@]2(C)[C@]([C@H](O)CC3C2C[C@@]4(O)[C@@]5(C)C3CC[C@@]5(O)[C@H](C)[C@@H](O)[C@@]46OC(C(C)=C6C)=O)(O)CC=C1	InChI=1S/C28H38O8/c1-13-14(2)28(36-22(13)32)21(31)15(3)25(33)10-8-17-16-11-20(30)26(34)9-6-7-19(29)23(26,4)18(16)12-27(28,35)24(17,25)5/h6-7,15-18,20-21,30-31,33-35H,8-12H2,1-5H3/t15-,16?,17?,18?,20-,21-,23+,24+,25-,26+,27-,28-/m1/s1	OSAOWATUTILJKL-PVSANNAPSA-N	Jaborosa runcinata Lam	2014	10.1016/j.ejmech.2014.05.045	147	Jaborosalactone 48
510	2,3-Dihydrotrechonolide A	C28H38O7	486.262	486.605	O=C1[C@@]2(C)[C@@]([C@H]3C[C@]4([H])[C@]2([H])C[C@@]5(O)[C@@]6(C)[C@@]4([H])CC[C@@]6(O)[C@H](C)[C@@H]([C@@H]7OC(C(C)=C7C)=O)O5)(O3)CCC1	InChI=1S/C28H38O7/c1-13-14(2)23(30)33-21(13)22-15(3)26(31)10-8-17-16-11-20-27(34-20)9-6-7-19(29)24(27,4)18(16)12-28(32,35-22)25(17,26)5/h15-18,20-22,31-32H,6-12H2,1-5H3/t15-,16+,17+,18+,20-,21-,22+,24+,25+,26-,27-,28+/m1/s1	OBYLBWUTUWVGBK-GQYGZUCJSA-N	Jaborosa caulescens var. bipinnatifida (Solanaceae)	2014	10.1016/j.phytochem.2013.11.005	149
511	2,3-Dihydro-21-hydroxytrechonolide A	C28H38O8	502.257	502.604	O=C1[C@@]2(C)[C@@]([C@H]3C[C@]4([H])[C@]2([H])C[C@@]5(O)[C@@]6(C)[C@@]4([H])CC[C@@]6(O)[C@H](CO)[C@@H]([C@@H]7OC(C(C)=C7C)=O)O5)(O3)CCC1	InChI=1S/C28H38O8/c1-13-14(2)23(31)34-21(13)22-18(12-29)26(32)9-7-16-15-10-20-27(35-20)8-5-6-19(30)24(27,3)17(15)11-28(33,36-22)25(16,26)4/h15-18,20-22,29,32-33H,5-12H2,1-4H3/t15-,16-,17-,18+,20+,21+,22-,24-,25-,26+,27+,28-/m0/s1	XOABJURFUZFGKL-YOZRJTROSA-N	Jaborosa caulescens var. bipinnatifida (Solanaceae)	2014	10.1016/j.phytochem.2013.11.005	149
512	Chantriolide E	C32H44O10	588.293	588.694	C[C@@]12[C@]([C@@H](O3)[C@@H]3[C@]4([H])[C@]2([H])C[C@H](OC(C)=O)[C@@]5(C)[C@]4(CC[C@]5([H])[C@@H]([C@@H](CC6=C(C)C(OC6)=O)O)C)[H])(O)C[C@H]7[C@H](O7)[C@@H]1OC(C)=O	InChI=1S/C32H44O10/c1-13-17(12-38-29(13)36)9-21(35)14(2)18-7-8-19-24-20(10-23(30(18,19)5)39-15(3)33)31(6)27(40-16(4)34)25-22(41-25)11-32(31,37)28-26(24)42-28/h14,18-28,35,37H,7-12H2,1-6H3/t14-,18+,19-,20-,21+,22-,23-,24-,25-,26-,27-,28-,30+,31-,32-/m0/s1	VCKAEKUKUTZHIL-UJLRICLZSA-N	Tacca chantrieri	2015	10.1055/s-0034-1396203	150
513	Perulactone E	C28H40O9	520.267	520.619	O=C1[C@@]2(C)[C@@]([C@H]3CC4C2CC[C@@]5(C)[C@]4(CC[C@]5([C@@](C)(O)[C@H](O)C[C@H]6[C@@H](C)C(OC6)=O)O)O)(O3)[C@@H](O)C=C1	InChI=1S/C28H40O9/c1-14-15(13-36-22(14)32)11-20(31)25(4,33)27(35)10-9-26(34)17-12-21-28(37-21)19(30)6-5-18(29)24(28,3)16(17)7-8-23(26,27)2/h5-6,14-17,19-21,30-31,33-35H,7-13H2,1-4H3/t14-,15-,16?,17?,19+,20-,21-,23+,24+,25+,26-,27+,28-/m1/s1	DWFFBMIOVLKBDU-LNXOKOKJSA-N	Physalis peruviana	2012	10.1016/j.steroids.2011.09.011	64
514	Perulactone F	C28H38O9	518.252	518.603	O=C(C=C1)[C@@]2(C)[C@@]([C@H]3CC4C2CC[C@@]5(C)[C@]4(CC[C@]5([C@@](C)(O)[C@H](O)C[C@H]6[C@@H](C)C(OC6)=O)O)O)(O3)C1=O	InChI=1S/C28H38O9/c1-14-15(13-36-22(14)32)11-20(31)25(4,33)27(35)10-9-26(34)17-12-21-28(37-21)19(30)6-5-18(29)24(28,3)16(17)7-8-23(26,27)2/h5-6,14-17,20-21,31,33-35H,7-13H2,1-4H3/t14-,15-,16?,17?,20-,21-,23+,24+,25+,26-,27+,28-/m1/s1	GVQHXUJYQDPQFR-IEWYNFSDSA-N	Physalis peruviana	2012	10.1016/j.steroids.2011.09.011	64
515	Perulactone G	C28H40O9	520.267	520.619	O=C1[C@@]2(C)[C@]3([C@@H](O)CC4C2CC[C@@]5(C)[C@]4(CC[C@]5([C@@](C)(O)[C@H](O)C[C@H]6[C@@H](C)C(OC6)=O)O)O)[C@@H](O3)C=C1	InChI=1S/C28H40O9/c1-14-15(13-36-22(14)32)11-19(30)25(4,33)27(35)10-9-26(34)17-12-20(31)28-21(37-28)6-5-18(29)24(28,3)16(17)7-8-23(26,27)2/h5-6,14-17,19-21,30-31,33-35H,7-13H2,1-4H3/t14-,15-,16?,17?,19-,20+,21+,23+,24+,25+,26-,27+,28+/m1/s1	MJPFUFCDONTBTM-PVXYQNTCSA-N	Physalis peruviana	2012	10.1016/j.steroids.2011.09.011	64
516	Perulactone H	C28H40O7	488.277	488.621	O=C(C=CC1)[C@@]2(C)C1=CCC3C2CC[C@@]4(C)[C@]3(CC[C@@]4([C@@](C)(O)[C@H](O)C[C@H]5[C@@H](C)C(OC5)=O)O)O	InChI=1S/C28H40O7/c1-16-17(15-35-23(16)31)14-22(30)26(4,32)28(34)13-12-27(33)20-9-8-18-6-5-7-21(29)25(18,3)19(20)10-11-24(27,28)2/h5,7-8,16-17,19-20,22,30,32-34H,6,9-15H2,1-4H3/t16-,17-,19?,20?,22-,24+,25+,26+,27-,28-/m1/s1	GRNQXNIWEPWACV-HGPVUELISA-N	Physalis peruviana	2012	10.1016/j.steroids.2011.09.011	64
517	Perulactone I	C28H40O8	504.272	504.62	O=C1[C@@]2(C)[C@@]([C@H]3C[C@]4([H])[C@]2([H])CC[C@@]5(C)[C@@]4(O)CC[C@@]5(O)[C@@]([C@H](O)C[C@H]6[C@@H](C)C(OC6)=O)(C)O)(O3)CC=C1	InChI=1S/C28H40O8/c1-15-16(14-35-22(15)31)12-20(30)25(4,32)28(34)11-10-26(33)18-13-21-27(36-21)8-5-6-19(29)24(27,3)17(18)7-9-23(26,28)2/h5-6,15-18,20-21,30,32-34H,7-14H2,1-4H3/t15-,16-,17+,18-,20-,21-,23+,24+,25+,26-,27-,28+/m1/s1	VYNDJKGODHLVDH-RLELNMHQSA-N	Physalis peruviana	2017	10.1021/acs.jnatprod.6b01129	32
518	Perulactone J	C28H40O6	472.283	472.622	O=C(C=CC1)[C@@]2(C)C1=CC[C@]3([H])[C@]2([H])CC[C@@]4(C)[C@@]3(O)CC[C@]4([H])[C@@]([C@H](O)C[C@H]5[C@@H](C)C(OC5)=O)(C)O	InChI=1S/C28H40O6/c1-16-17(15-34-24(16)31)14-23(30)27(4,32)21-11-13-28(33)20-9-8-18-6-5-7-22(29)26(18,3)19(20)10-12-25(21,28)2/h5,7-8,16-17,19-21,23,30,32-33H,6,9-15H2,1-4H3/t16-,17-,19+,20-,21+,23-,25-,26+,27-,28-/m1/s1	WOPJAFWIJDQFEV-YLMXXEPMSA-N	Physalis peruviana	2017	10.1021/acs.jnatprod.6b01129	32
519	Perulactone K	C28H38O6	470.267	470.606	O=C1[C@@]2(C)[C@@]([C@H]3C[C@]4([H])[C@]2([H])CC[C@@]5(C)[C@@]4([H])CC=C5[C@@]([C@H](O)C[C@H]6[C@@H](C)C(OC6)=O)(C)O)(O3)CC=C1	InChI=1S/C28H38O6/c1-15-16(14-33-24(15)31)12-22(30)27(4,32)20-8-7-18-17-13-23-28(34-23)10-5-6-21(29)26(28,3)19(17)9-11-25(18,20)2/h5-6,8,15-19,22-23,30,32H,7,9-14H2,1-4H3/t15-,16-,17+,18+,19+,22-,23-,25+,26+,27-,28-/m1/s1	SXQXOIMXUWUPCG-JNEMENPDSA-N	Physalis peruviana	2017	10.1021/acs.jnatprod.6b01129	32
520	Perulactone L	C28H40O7	488.277	488.621	O=C(CC=C1)[C@@]2(C)C1=CC[C@]3([H])[C@]2([H])CC[C@@]4(C)[C@@]3(O)CC[C@@]4(O)[C@@]([C@H](O)C[C@H]5[C@@H](C)C(OC5)=O)(C)O	InChI=1S/C28H40O7/c1-16-17(15-35-23(16)31)14-22(30)26(4,32)28(34)13-12-27(33)20-9-8-18-6-5-7-21(29)25(18,3)19(20)10-11-24(27,28)2/h5-6,8,16-17,19-20,22,30,32-34H,7,9-15H2,1-4H3/t16-,17-,19+,20-,22-,24+,25+,26+,27-,28+/m1/s1	DDXADHCUGQROPJ-WDLFJYIDSA-N	Physalis peruviana	2017	10.1021/acs.jnatprod.6b01129	32
521	Aromaphysalin A	C28H30O10	526.184	526.538	O[C@H]1C2=C(C)C(O)=CC=C2[C@]3([H])[C@@]([C@]45OC[C@@H]6[C@](C[C@](OC6=O)([H])[C@]7(C)O8)(C)C([C@]49O)[C@@]7(O5)[C@@](C8=O)(O)C[C@@]39[H])([H])C1	InChI=1S/C28H30O10/c1-10-15(29)5-4-11-18(10)16(30)6-12-19(11)13-7-25(33)22(32)37-24(3)17-8-23(2)14(20(31)36-17)9-35-28(12)26(13,34)21(23)27(24,25)38-28/h4-5,12-14,16-17,19,21,29-30,33-34H,6-9H2,1-3H3/t12-,13+,14+,16-,17-,19-,21?,23-,24+,25-,26+,27+,28-/m1/s1	AVYOFXPLPGDPSP-JYEPSBQRSA-N	Physalis angulata L	2017	10.1039/c6ob02656g	151
522	Aromaphysalin B	C28H32O11	544.194	544.553	O[C@@H](CC(C1=O)=C[C@]2([H])C[C@@](C3(O)[C@@H]([C@](C(C(O)=O)=C)(C)C[C@](O)([H])[C@]3(C)O4)[C@]12O)(O)C4=O)C5=C(C)C(O)=CC=C5	InChI=1S/C28H32O11/c1-12-16(6-5-7-17(12)29)18(30)9-14-8-15-10-26(36)23(35)39-25(4)19(31)11-24(3,13(2)21(33)34)22(28(25,26)38)27(15,37)20(14)32/h5-8,15,18-19,22,29-31,36-38H,2,9-11H2,1,3-4H3,(H,33,34)/t15-,18+,19-,22+,24-,25+,26-,27-,28+/m1/s1	CFMGAOZNPFAFGY-NWYAAVLGSA-N	Physalis angulata L	2017	10.1039/c7ob02205k	121
523	Daturafoliside J	C40H54O14	758.351	758.858	C[C@H]([C@]1([H])OC(C(CO[C@@H]([C@@H]2O)O[C@H](CO)[C@@H](O)[C@@H]2O)=C(C)C1)=O)[C@@]3([H])CC[C@@]([C@]3(C)CC4)([H])C5=C4C6=C(C(O[C@@H]([C@@H]7O)O[C@H](CO)[C@@H](O)[C@@H]7O)=C5)C(C)=CC=C6	InChI=1S/C40H54O14/c1-17-6-5-7-21-20-10-11-40(4)24(8-9-25(40)22(20)13-27(30(17)21)52-39-36(48)34(46)32(44)29(15-42)54-39)19(3)26-12-18(2)23(37(49)51-26)16-50-38-35(47)33(45)31(43)28(14-41)53-38/h5-7,13,19,24-26,28-29,31-36,38-39,41-48H,8-12,14-16H2,1-4H3/t19-,24+,25-,26+,28+,29+,31+,32+,33-,34-,35+,36+,38+,39+,40+/m0/s1	OTZZGXPMLPNQEM-ORXMQOIDSA-N	Datura metel L.	2018	10.1016/j.phytochem.2018.08.005	88
524	4β-Formyl-6β,27-dihydroxy-1-oxo-witha-2,24-dienolide	C28H38O6	470.267	470.606	O=C1OC([C@@H](C)[C@@]2([H])CC[C@@]3([H])[C@]4([H])C[C@@H](O)[C@@]5(C([H])=O)[C@](C)(C(C=C5)=O)[C@@]4([H])CC[C@@]32C)CC(C)=C1CO	InChI=1S/C28H38O6/c1-15-11-22(34-25(33)18(15)13-29)16(2)19-5-6-20-17-12-24(32)28(14-30)10-8-23(31)27(28,4)21(17)7-9-26(19,20)3/h8,10,14,16-17,19-22,24,29,32H,5-7,9,11-13H2,1-4H3/t16-,17-,19+,20-,21-,22?,24+,26+,27-,28+/m0/s1	NRUAJFGNWWQRRL-YKLAZRBTSA-N	Withania aristata	2012	10.1016/j.ejmech.2012.05.032	42
525	4β-Formyl-6β,27-dihydroxy-1-oxo-witha-24-enolide	C28H40O6	472.283	472.622	O=C1OC([C@@H](C)[C@@]2([H])CC[C@@]3([H])[C@]4([H])C[C@@H](O)[C@@]5(C([H])=O)[C@](C)(C(CC5)=O)[C@@]4([H])CC[C@@]32C)CC(C)=C1CO	InChI=1S/C28H40O6/c1-15-11-22(34-25(33)18(15)13-29)16(2)19-5-6-20-17-12-24(32)28(14-30)10-8-23(31)27(28,4)21(17)7-9-26(19,20)3/h14,16-17,19-22,24,29,32H,5-13H2,1-4H3/t16-,17-,19+,20-,21-,22?,24+,26+,27-,28+/m0/s1	KPDWAMLYCQWFKU-YKLAZRBTSA-N	Withania aristata	2012	10.1016/j.ejmech.2012.05.032	42
526	Withalongolide F	C27H36O4	424.261	424.581	O=C1OC([C@@H](C)[C@@]2([H])CC[C@@]3([H])[C@]4([H])CC=C5[C@](C)(C(C=C5)=O)[C@@]4([H])CC[C@@]32C)CC(C)=C1CO	InChI=1S/C27H36O4/c1-15-13-23(31-25(30)19(15)14-28)16(2)20-8-9-21-18-7-5-17-6-10-24(29)27(17,4)22(18)11-12-26(20,21)3/h5-6,10,16,18,20-23,28H,7-9,11-14H2,1-4H3/t16-,18-,20+,21-,22-,23?,26+,27-/m0/s1	IBYXDWNHLOGYIN-IGSXFBOJSA-N	Physalis longifolia	2011	10.1021/np200635r	38
527	Trichoside B	C33H48O12	636.315	636.735	O=C(C[C@@H]1O)[C@@]2(C)C31CCC43[C@]2([H])CC[C@@]5(C)[C@@]4(O)CC[C@]5([H])[C@@]([C@]6([H])OC(C(CO[C@@H]([C@@H]7O)O[C@H](CO)[C@@H](O)[C@@H]7O)=C(C)C6)=O)(C)O	InChI=1S/C33H48O12/c1-15-11-22(45-26(40)16(15)14-43-27-25(39)24(38)23(37)17(13-34)44-27)30(4,41)18-6-8-33(42)28(18,2)7-5-19-29(3)20(35)12-21(36)32(29)10-9-31(19,32)33/h17-19,21-25,27,34,36-39,41-42H,5-14H2,1-4H3/t17-,18+,19-,21+,22-,23-,24+,25-,27-,28-,29+,30-,31?,32?,33+/m1/s1	HRINGJZBAVMAQA-MSVXKXOQSA-N	Tricholepis eburnea	2015	10.1080/14786419.2015.1030340	91
528	Daturmetelide A	C28H38O5	454.272	454.607	[H][C@]12[C@@]([C@]([H])(CC[C@]3([H])[C@@H](C4OC(C(C)=C(C)C4)=O)C)[C@]3(C)CC2)([H])[C@H](O)[C@@H](O)C5=CC(C=C[C@@]51C)=O	InChI=1S/C28H38O5/c1-14-12-22(33-26(32)15(14)2)16(3)18-6-7-19-23-20(9-11-27(18,19)4)28(5)10-8-17(29)13-21(28)24(30)25(23)31/h8,10,13,16,18-20,22-25,30-31H,6-7,9,11-12H2,1-5H3/t16-,18+,19-,20-,22?,23-,24-,25-,27+,28+/m0/s1	GDHBEZIMXBUGQX-JYFVWEDUSA-N	Datura metel L.	2020	10.1016/j.bioorg.2019.103541	82
529	Daturmetelide B	C28H38O6	470.267	470.606	[H][C@]12[C@@]([C@]([H])(CC[C@]3([H])[C@@H](C4OC(C(CO)=C(C)C4)=O)C)[C@]3(C)CC2)([H])[C@H](O)[C@@H](O)C5=CC(C=C[C@@]51C)=O	InChI=1S/C28H38O6/c1-14-11-22(34-26(33)17(14)13-29)15(2)18-5-6-19-23-20(8-10-27(18,19)3)28(4)9-7-16(30)12-21(28)24(31)25(23)32/h7,9,12,15,18-20,22-25,29,31-32H,5-6,8,10-11,13H2,1-4H3/t15-,18+,19-,20-,22?,23-,24-,25-,27+,28+/m0/s1	JNZPYCNXTNNDCG-BBTIIDMESA-N	Datura metel L.	2020	10.1016/j.bioorg.2019.103541	82
530	Sinubrasolide D	C28H38O4	438.277	438.608	O=C1C=C[C@@]2(C)C(CC[C@]3([H])[C@]2([H])CC[C@@]4(C)[C@@]3([H])C[C@H]5[C@]4([H])[C@H](C)[C@@]6(OC([C@H](C)[C@@H](C)C6)=O)O5)=C1	InChI=1S/C28H38O4/c1-15-14-28(32-25(30)16(15)2)17(3)24-23(31-28)13-22-20-7-6-18-12-19(29)8-10-26(18,4)21(20)9-11-27(22,24)5/h8,10,12,15-17,20-24H,6-7,9,11,13-14H2,1-5H3/t15-,16+,17-,20+,21-,22-,23-,24-,26-,27-,28+/m0/s1	URIXTJQXJUSJRY-XVTOMHQGSA-N	Sinularia brassica	2013	10.1021/np400454q	145
531	Sinubrasolide G	C30H42O3	450.313	450.663	O=C1C=C[C@@]2(C)C(CC[C@]3([H])[C@]2([H])CC[C@@]4(C)[C@@]3([H])CCC4[C@H](C)[C@]5([H])[C@]6(COC([C@@H](C)[C@H]6C)=O)C5)=C1	InChI=1S/C30H42O3/c1-17-19(3)30(16-33-27(17)32)15-26(30)18(2)23-8-9-24-22-7-6-20-14-21(31)10-12-28(20,4)25(22)11-13-29(23,24)5/h10,12,14,17-19,22-26H,6-9,11,13,15-16H2,1-5H3/t17-,18-,19+,22-,23?,24-,25-,26+,28-,29+,30-/m0/s1	XGBPKOLRXUUHOE-LJMPIEMWSA-N	Sinularia brassica	2013	10.1021/np400454q	145
532	Sinubrasolide L	C28H40O3	424.298	424.625	[H][C@]12[C@@]([C@@](CC[C@]3([H])[C@@H]([C@]4([H])OC([C@H](C)[C@@H](C)C4)=O)C)([H])[C@]3(C)CC2)([H])CCC5=CC(C=C[C@@]51C)=O	InChI=1S/C28H40O3/c1-16-14-25(31-26(30)17(16)2)18(3)22-8-9-23-21-7-6-19-15-20(29)10-12-27(19,4)24(21)11-13-28(22,23)5/h10,12,15-18,21-25H,6-9,11,13-14H2,1-5H3/t16-,17+,18-,21-,22+,23-,24-,25+,27-,28+/m0/s1	PUFLTJAOMGFPSC-UZPHHUJESA-N	Sinularia brassica	2017	10.1016/j.bmcl.2017.06.029	146
533	Paraminabeolide A	C28H36O4	436.261	436.592	O=C(C(C)=C(C)C1)O[C@@]1([H])[C@@H](C)[C@H]2CC[C@@]3([H])[C@]4([H])CCC5=CC(C=C[C@]5(C)[C@@]4([H])CC[C@@]32C([H])=O)=O	InChI=1S/C28H36O4/c1-16-13-25(32-26(31)17(16)2)18(3)22-7-8-24-21-6-5-19-14-20(30)9-11-27(19,4)23(21)10-12-28(22,24)15-29/h9,11,14-15,18,21-25H,5-8,10,12-13H2,1-4H3/t18-,21+,22+,23-,24-,25+,27-,28-/m0/s1	TXZGYZBGLCFIQO-JFDBTBFLSA-N	Paraminabea acronocephala	2011	10.1021/np2000705	53
534	Paraminabeolide B	C30H42O5	482.303	482.661	O=C([C@@H](C)[C@@H](C)C1)O[C@@]1([H])[C@@H](C)[C@H]2CC[C@@]3([H])[C@]4([H])CCC5=CC(C=C[C@]5(C)[C@@]4([H])CC[C@@]32COC(C)=O)=O	InChI=1S/C30H42O5/c1-17-14-27(35-28(33)18(17)2)19(3)24-8-9-26-23-7-6-21-15-22(32)10-12-29(21,5)25(23)11-13-30(24,26)16-34-20(4)31/h10,12,15,17-19,23-27H,6-9,11,13-14,16H2,1-5H3/t17-,18-,19-,23+,24+,25-,26-,27+,29-,30-/m0/s1	CJVKACGPAQCXAA-RXQWXACOSA-N	Paraminabea acronocephala	2011	10.1021/np2000705	53
535	Peruvianolide B	C28H38O5	454.272	454.607	[H][C@]12[C@@]([C@@](CC[C@]3([H])[C@@H]([C@]4([H])O[C@@H](O)[C@@](C)(O5)[C@]5(C)C4)C)([H])[C@]3(C)CC2)([H])CC(C6=CC(C=C[C@@]61C)=O)=O	InChI=1S/C28H38O5/c1-15(23-14-27(4)28(5,33-27)24(31)32-23)18-6-7-19-17-13-22(30)21-12-16(29)8-10-26(21,3)20(17)9-11-25(18,19)2/h8,10,12,15,17-20,23-24,31H,6-7,9,11,13-14H2,1-5H3/t15-,17-,18+,19-,20-,23+,24+,25+,26+,27-,28+/m0/s1	IZVFTBRJDWQYQQ-CTYZRWODSA-N	Physalis peruviana	2019	10.1016/j.bioorg.2019.03.051	28
536	Physacoztolide F	C42H62O19	870.389	870.939	O=C1[C@@]2(C)[C@@]3([C@H](O[C@@H]([C@@H]4O)O[C@H](CO[C@@H]([C@@H]5O)O[C@H](CO)[C@@H](O)[C@@H]5O)[C@@H](O)[C@@H]4O)C[C@]6([H])[C@]2([H])CC[C@@]7(COC(C)=O)[C@]6(CC[C@@]7(O)[C@@](C)(O)[C@]8([H])OC(C(C)=C(C)C8)=O)O)C[C@H]3C1	InChI=1S/C42H62O19/c1-17-10-26(60-34(52)18(17)2)38(5,53)42(55)9-8-41(54)22-12-27(40-13-20(40)11-25(45)37(40,4)21(22)6-7-39(41,42)16-57-19(3)44)61-36-33(51)31(49)29(47)24(59-36)15-56-35-32(50)30(48)28(46)23(14-43)58-35/h20-24,26-33,35-36,43,46-51,53-55H,6-16H2,1-5H3/t20-,21+,22-,23-,24-,26-,27-,28-,29-,30+,31+,32-,33-,35-,36+,37+,38+,39-,40+,41-,42-/m1/s1	JVXXJVYXQVMVLC-ANWJSWOWSA-N	Physalis coztomatl	2015	10.1016/j.phytochem.2014.10.012	71
537	Capsisteroid K	C38H58O13	722.388	722.869	O=C1[C@@]2(C)[C@@]3([C@H](O)C[C@]4([H])[C@]2([H])CC[C@@]5(C)[C@@]4([H])CC[C@]5(O)[C@@H]([C@]6([H])O[C@@H](O[C@H]7[C@H](O)[C@@H](O)[C@H](O)[C@@H](COC(/C=C/C)=O)O7)[C@@](C)(O)[C@@](O)(C)C6)C)C[C@H]3C1	InChI=1S/C38H58O13/c1-7-8-27(41)48-17-24-28(42)29(43)30(44)31(49-24)51-32-36(6,46)34(4,45)16-23(50-32)18(2)38(47)12-10-21-20-14-26(40)37-15-19(37)13-25(39)35(37,5)22(20)9-11-33(21,38)3/h7-8,18-24,26,28-32,40,42-47H,9-17H2,1-6H3/b8-7+/t18-,19-,20+,21+,22+,23-,24-,26-,28-,29+,30-,31+,32+,33+,34-,35+,36-,37+,38+/m1/s1	DEZBZSROFHJMNR-NUMOQSMZSA-N	Solanum capsicoide	2019	10.1246/bcsj.20180225	79
538	1,10-Seco withaperuvin C	C28H38O7	486.262	486.605	O=C1O[C@H]2C(C=CC1)=C(C)[C@]3([H])[C@@]([C@@](CC[C@@]4(O)[C@](O)(C)[C@@H]5OC(C(C)=C(C)C5)=O)(O)[C@]4(C)CC3)([H])C2	InChI=1S/C28H38O7/c1-15-13-22(35-24(30)16(15)2)26(5,31)28(33)12-11-27(32)20-14-21-19(7-6-8-23(29)34-21)17(3)18(20)9-10-25(27,28)4/h6-7,18,20-22,31-33H,8-14H2,1-5H3/t18-,20-,21-,22-,25+,26+,27-,28+/m1/s1	IPKOELXELPUFEK-OTUIKDRCSA-N	Physalis peruviana	2010	10.1080/10286020.2010.482523	153
539	Daturafoliside K	C34H48O11	632.32	632.747	C[C@H]([C@]1([H])OC(C(CO[C@@H]([C@@H]2O)O[C@H](CO)[C@@H](O)[C@@H]2O)=C(C)C1)=O)[C@@]3([H])CC[C@@]4([H])[C@@]5([H])[C@](C(C)=C(C=CCC(O6)=O)[C@H]6[C@H]5O)([H])CC[C@@]43C	InChI=1S/C34H48O11/c1-15-12-23(43-32(41)20(15)14-42-33-30(40)29(39)27(37)24(13-35)44-33)17(3)21-8-9-22-26-18(10-11-34(21,22)4)16(2)19-6-5-7-25(36)45-31(19)28(26)38/h5-6,17-18,21-24,26-31,33,35,37-40H,7-14H2,1-4H3/t17-,18+,21+,22-,23+,24+,26+,27+,28-,29-,30+,31-,33+,34+/m0/s1	BHLUIEYHYQNOPF-VGMLPTNISA-N	Datura metel L.	2018	10.1016/j.phytochem.2018.08.005	88
540	Baimantuoluoline G	C28H38O6	470.267	470.606	C[C@H]([C@]1([H])OC(C(CO)=C(C)C1)=O)[C@@]2([H])CC[C@@]3([H])[C@@]4([H])[C@](C(C)=C(C=CCC(O5)=O)[C@H]5C4)([H])C[C@@H](O)[C@@]32C	InChI=1S/C28H38O6/c1-14-10-23(34-27(32)20(14)13-29)16(3)21-8-9-22-19-11-24-17(6-5-7-26(31)33-24)15(2)18(19)12-25(30)28(21,22)4/h5-6,16,18-19,21-25,29-30H,7-13H2,1-4H3/t16-,18+,19+,21+,22-,23+,24+,25+,28+/m0/s1	PKVUVFJIRUYYSO-UQRSSGOGSA-N	Datura metel L.	2011	10.3390/molecules16075833	154
541	Physaminimin A	C29H38O7	498.262	498.616	O=C(C(C)=C(C)C1)O[C@@]1([H])[C@]2([C@H]3C[C@H](O)[C@@]4([H])[C@]5([H])C[C@@H]6C(C=CCC(O6)=O)=C(C)[C@@]5([H])CC[C@@]43[C@H](OC)O2)C	InChI=1S/C29H38O7/c1-14-11-23(35-26(32)15(14)2)28(4)22-13-20(30)25-19-12-21-18(7-6-8-24(31)34-21)16(3)17(19)9-10-29(22,25)27(33-5)36-28/h6-7,17,19-23,25,27,30H,8-13H2,1-5H3/t17-,19-,20+,21-,22-,23-,25-,27?,28-,29+/m1/s1	KGUBTBAVJZEEQQ-MHEVSTMFSA-N	Physalis minima	2014	10.1016/j.steroids.2014.01.004	129
542	Physaminimin B	C29H38O7	498.262	498.616	O=C(C(C)=C(C)C1)O[C@@]1([H])[C@]2([C@H]3C[C@H](O)[C@@]4([H])[C@]5([H])C[C@@H]6C(C=CCC(O6)=O)=C(C)[C@@]5([H])CC[C@@]43[C@@H](OC)O2)C	InChI=1S/C29H38O7/c1-14-11-23(35-26(32)15(14)2)28(4)22-13-20(30)25-19-12-21-18(7-6-8-24(31)34-21)16(3)17(19)9-10-29(22,25)27(33-5)36-28/h6-7,17,19-23,25,27,30H,8-13H2,1-5H3/t17-,19-,20+,21-,22-,23-,25-,27?,28-,29+/m1/s1	KGUBTBAVJZEEQQ-MHEVSTMFSA-N	Physalis minima	2014	10.1016/j.steroids.2014.01.004	129
543	Physalin V1	C28H30O10	526.184	526.538	O=C1[C@]2([H])[C@]3([C@]4(C)[C@]([H])(O5)C[C@]2(C)[C@@H]6C5=O)[C@](C(O4)=O)(O)CC[C@@]7([H])[C@@]([C@]1(OC6)O3)([H])C[C@@H]8C(C=CCC(O8)=O)=C7C	InChI=1S/C28H30O10/c1-12-13-7-8-26(33)23(32)37-25(3)18-10-24(2)16(22(31)36-18)11-34-27(21(30)20(24)28(25,26)38-27)15(13)9-17-14(12)5-4-6-19(29)35-17/h4-5,13,15-18,20,33H,6-11H2,1-3H3/t13-,15-,16+,17-,18-,20+,24-,25+,26+,27+,28+/m1/s1	SGSSJICSCNZXQX-GRTHYLOESA-N	Physalis angulata	2017	10.1038/s41598-017-03849-9	122	Physalin V
544	Daturafoliside L	C33H46O11	618.304	618.72	C[C@H]([C@]1([H])OC(C(CO[C@@H]([C@@H]2O)O[C@H](CO)[C@@H](O)[C@@H]2O)=C(C)C1)=O)[C@@]3([H])CC[C@@]4([H])[C@@]5([H])[C@]([C@](C(C=C[C@H]6O7)=O)(C)[C@@]67[C@H]5O)([H])CC[C@@]43C	InChI=1S/C33H46O11/c1-14-11-20(42-29(40)16(14)13-41-30-27(38)26(37)25(36)21(12-34)43-30)15(2)17-5-6-18-24-19(9-10-31(17,18)3)32(4)22(35)7-8-23-33(32,44-23)28(24)39/h7-8,15,17-21,23-28,30,34,36-39H,5-6,9-13H2,1-4H3/t15-,17+,18-,19-,20+,21+,23+,24-,25+,26-,27+,28-,30+,31+,32-,33-/m0/s1	GGXUOZYAOVUJAQ-DLXVPGIPSA-N	Datura metel L.	2018	10.1016/j.phytochem.2018.08.005	88
545	Withalongolide L	C33H48O11	620.32	620.736	O=C1C2=C([C@@H](O)C[C@]3([H])[C@]2([H])CC[C@@]4(C)C3CC[C@@]4([C@@H]([C@]5([H])OC(C(C)=C(CO[C@@H]([C@@H]6O)O[C@H](CO)[C@@H](O)[C@@H]6O)C5)=O)C)[H])C[C@@H](O)C1	InChI=1S/C33H48O11/c1-14-16(13-42-32-30(40)29(39)28(38)26(12-34)44-32)8-25(43-31(14)41)15(2)21-4-5-22-19-11-23(36)20-9-17(35)10-24(37)27(20)18(19)6-7-33(21,22)3/h15,17-19,21-23,25-26,28-30,32,34-36,38-40H,4-13H2,1-3H3/t15-,17+,18-,19+,21+,22?,23-,25+,26+,28+,29-,30+,32+,33+/m0/s1	DKRAEDZNHJHJAB-OGUZLPGNSA-N	Physalis longifolia	2011	10.1021/np200635r	38
546	Withalongolide M	C33H48O10	604.325	604.737	O=C1C2=C(CC[C@]3([H])[C@]2([H])CC[C@@]4(C)C3CC[C@@]4([C@@H]([C@]5([H])OC(C(C)=C(CO[C@@H]([C@@H]6O)O[C@H](CO)[C@@H](O)[C@@H]6O)C5)=O)C)[H])C[C@@H](O)C1	InChI=1S/C33H48O10/c1-15-18(14-41-32-30(39)29(38)28(37)26(13-34)43-32)11-25(42-31(15)40)16(2)22-6-7-23-20-5-4-17-10-19(35)12-24(36)27(17)21(20)8-9-33(22,23)3/h16,19-23,25-26,28-30,32,34-35,37-39H,4-14H2,1-3H3/t16-,19+,20+,21-,22+,23?,25+,26+,28+,29-,30+,32+,33+/m0/s1	CLUVBNATYXEVRS-RQBZEMJFSA-N	Physalis longifolia	2011	10.1021/np200635r	38
547	Withalongolide N	C33H48O10	604.325	604.737	[H][C@]12[C@@](C(CC[C@@]3([C@@H]([C@]4([H])OC(C(C)=C(CO[C@@H]([C@@H]5O)O[C@H](CO)[C@@H](O)[C@@H]5O)C4)=O)C)[H])[C@]3(C)CC2)([H])CC(C6=C1CC[C@@H](O)C6)=O	InChI=1S/C33H48O10/c1-15-17(14-41-32-30(39)29(38)28(37)27(13-34)43-32)10-26(42-31(15)40)16(2)23-6-7-24-21-12-25(36)22-11-18(35)4-5-19(22)20(21)8-9-33(23,24)3/h16,18,20-21,23-24,26-30,32,34-35,37-39H,4-14H2,1-3H3/t16-,18+,20+,21+,23+,24?,26+,27+,28+,29-,30+,32+,33+/m0/s1	GCUKFNAJZUUBSQ-CDDCHUOESA-N	Physalis longifolia	2011	10.1021/np200635r	38
548	Withahisolide H	C28H40O8	504.272	504.62	C[C@@]12[C@]([C@@H](O3)[C@@H]3[C@]4([H])[C@]2([H])CC[C@@]5(C)[C@@]4([H])CC[C@]6([C@@H](C)[C@@]7([H])C[C@@](C)(O)[C@@](O)(C)[C@@](O7)([H])O6)O5)(O)CC=CC1=O	InChI=1S/C28H40O8/c1-14-17-13-24(3,30)26(5,31)22(33-17)35-28(14)12-9-15-19-16(8-11-23(15,2)36-28)25(4)18(29)7-6-10-27(25,32)21-20(19)34-21/h6-7,14-17,19-22,30-32H,8-13H2,1-5H3/t14-,15-,16-,17+,19-,20-,21-,22+,23-,24+,25-,26+,27-,28+/m0/s1	NOIOOPVGSGFROV-DZBBEEEJSA-N	Physalis hispida	2014	10.1021/np400953n	140
549	Nicphysatone T	C28H40O7	488.277	488.621	O=C1[C@@]2(C)[C@]([C@@H](O3)[C@@H]3[C@]4([H])[C@]2([H])CC[C@@]5(C)[C@@]4([H])CC[C@@]56[C@@H](C)[C@@H]7C[C@]([C@@](O)(C)[C@H](O)O7)(C)O6)(O)CC=C1	InChI=1S/C28H40O7/c1-14-17-13-24(3,26(5,31)22(30)33-17)35-28(14)12-9-15-19-16(8-11-23(15,28)2)25(4)18(29)7-6-10-27(25,32)21-20(19)34-21/h6-7,14-17,19-22,30-32H,8-13H2,1-5H3/t14-,15-,16-,17-,19-,20-,21-,22+,23-,24-,25-,26+,27-,28+/m0/s1	MMZNUCVCUUYOPO-VGIKFAQFSA-N	Nicandra physaloides	2018	10.1016/j.fitote.2018.11.003	155
550	Nicphysatone C	C28H40O8	504.272	504.62	O=C1[C@@]2(C)[C@]([C@@H](O3)[C@@H]3C4C2CC[C@@]5(C)C4CC[C@@]56[C@H](C)[C@H]7C[C@@]([C@@](O)(C)[C@H](O)O7)(C)O6)(O)C[C@@H]8[C@H]1O8	InChI=1S/C28H40O8/c1-12-15-10-24(3,26(5,31)22(30)34-15)36-28(12)9-7-13-17-14(6-8-23(13,28)2)25(4)20(29)18-16(33-18)11-27(25,32)21-19(17)35-21/h12-19,21-22,30-32H,6-11H2,1-5H3/t12-,13?,14?,15-,16-,17?,18-,19+,21+,22-,23+,24-,25+,26-,27+,28-/m1/s1	WMQICPMXGHJIKB-WCOBFKFRSA-N	Nicandra physaloides	2018	10.1016/j.steroids.2018.01.003	144
551	Alkesterol A	C28H44O2	412.334	412.658	C[C@]12C(C[C@@H](O)CC2)=CCC3C1CC[C@@]4(C)C3CC[C@@H]4[C@H](C)[C@@H]5CC([C@@](O)(C)C5)=C	InChI=1S/C28H44O2/c1-17-14-19(16-28(17,5)30)18(2)23-8-9-24-22-7-6-20-15-21(29)10-12-26(20,3)25(22)11-13-27(23,24)4/h6,18-19,21-25,29-30H,1,7-16H2,2-5H3/t18-,19-,21+,22?,23-,24?,25?,26+,27-,28-/m1/s1	IYRRXBQAMIZAAC-DDZBGARESA-N	Physalis pubeacens L.	2010	10.1080/10286020.2010.497657	156
552	Alkesterol B	C28H44O2	412.334	412.658	C[C@]12C(C[C@@H](O)CC2)=CCC3C1CC[C@@]4(C)C3CC[C@@H]4[C@H](C)[C@@H]5CC([C@@](C)(O)C5)=C	InChI=1S/C28H44O2/c1-17-14-19(16-28(17,5)30)18(2)23-8-9-24-22-7-6-20-15-21(29)10-12-26(20,3)25(22)11-13-27(23,24)4/h6,18-19,21-25,29-30H,1,7-16H2,2-5H3/t18-,19-,21+,22?,23-,24?,25?,26+,27-,28+/m1/s1	IYRRXBQAMIZAAC-NRVWJUHCSA-N	Physalis pubeacens L.	2010	10.1080/10286020.2010.497657	156
553	Withapubesin	C29H46O5	474.334	474.682	O[C@@H](C[C@H](O)C1)[C@@]2(C)C1=CC[C@]3([H])[C@]2([H])CC[C@@]4(C)[C@@]3([H])CC[C@]4([H])[C@H](C)[C@@]5([H])C[C@](C(C)=O)(C)[C@H](OC)O5	InChI=1S/C29H46O5/c1-16(24-15-28(4,17(2)30)26(33-6)34-24)21-9-10-22-20-8-7-18-13-19(31)14-25(32)29(18,5)23(20)11-12-27(21,22)3/h7,16,19-26,31-32H,8-15H2,1-6H3/t16-,19+,20-,21+,22-,23-,24+,25-,26?,27+,28-,29-/m0/s1	HHLIRCFXNOIIJJ-ITNXVCMVSA-N	Physalis pubeacens L.	2017	10.1039/c7ob02551c	132
554	Withapubeside A	C41H66O15	798.44	798.964	O[C@@H](C[C@H](O[C@@H]([C@@H]1O)O[C@H](CO[C@@H]([C@@H]2O)O[C@H](CO)[C@@H](O)[C@@H]2O)[C@@H](O)[C@@H]1O)C3)[C@@]4(C)C3=CC[C@]5([H])[C@]4([H])CC[C@@]6(C)[C@@]5([H])CC[C@]6([H])[C@H](C)[C@@]7([H])C[C@](C(C)=O)(C)[C@H](OC)O7	InChI=1S/C41H66O15/c1-18(26-15-40(4,19(2)43)38(51-6)56-26)23-9-10-24-22-8-7-20-13-21(14-29(44)41(20,5)25(22)11-12-39(23,24)3)53-37-35(50)33(48)31(46)28(55-37)17-52-36-34(49)32(47)30(45)27(16-42)54-36/h7,18,21-38,42,44-50H,8-17H2,1-6H3/t18-,21+,22-,23+,24-,25-,26+,27+,28+,29-,30+,31+,32-,33-,34+,35+,36+,37+,38?,39+,40-,41-/m0/s1	YWLRIOUTFUKGIZ-KEFIJYBZSA-N	Physalis pubeacens L.	2017	10.1039/c7ob02551c	132
555	28-Hydroxytubocapsenolide A	C28H36O7	484.246	484.589	O=C1[C@@]2(C)[C@@]([C@H]3C[C@]4([H])[C@]2([H])CCC5=C4C[C@@H](O)[C@@]5(C)[C@@H]([C@]6([H])OC(C(C)=C(CO)C6)=O)C)(O3)[C@@H](O)C=C1	InChI=1S/C28H36O7/c1-13-15(12-29)9-20(34-25(13)33)14(2)26(3)18-5-6-19-17(16(18)10-23(26)32)11-24-28(35-24)22(31)8-7-21(30)27(19,28)4/h7-8,14,17,19-20,22-24,29,31-32H,5-6,9-12H2,1-4H3/t14-,17+,19+,20-,22+,23-,24-,26+,27+,28-/m1/s1	KNZPMSAJQHKLML-NFRZCNPISA-N	Tubocapsicum anomalum	2018	10.1016/j.bioorg.2018.08.034	40
556	3β-Ethoxy-2,3-dihydrotubocapsenolide A	C30H42O7	514.293	514.659	O=C1[C@@]2(C)[C@@]([C@H]3C[C@]4([H])[C@]2([H])CCC5=C4C[C@@H](O)[C@@]5(C)[C@@H]([C@]6([H])OC(C(C)=C(C)C6)=O)C)(O3)[C@@H](O)[C@@H](OCC)C1	InChI=1S/C30H42O7/c1-7-35-22-13-24(32)29(6)20-9-8-19-17(18(20)12-25-30(29,37-25)26(22)33)11-23(31)28(19,5)16(4)21-10-14(2)15(3)27(34)36-21/h16,18,20-23,25-26,31,33H,7-13H2,1-6H3/t16-,18+,20+,21-,22?,23-,25-,26+,28+,29+,30+/m1/s1	MJUFFISUFSSFHG-HTVCBHDJSA-N	Tubocapsicum anomalum	2018	10.1016/j.bioorg.2018.08.034	40
557	Irinan A	C19H24O5	332.162	332.396	[H][C@]12[C@@]([C@](O)(CCC3=O)[C@]3(C)CC2)([H])C[C@@H]4[C@]([C@]51C)(O4)[C@@H](O)C=CC5=O	InChI=1S/C19H24O5/c1-16-7-5-10-11(18(16,23)8-6-12(16)20)9-15-19(24-15)14(22)4-3-13(21)17(10,19)2/h3-4,10-11,14-15,22-23H,5-9H2,1-2H3/t10-,11+,14-,15+,16+,17-,18+,19+/m0/s1	QWDJGSTUEKCVGY-BKFMIIAUSA-N	Physalis peruviana	2019	10.3762/bjoc.15.196	157
558	Irinan B	C19H24O3	300.173	300.398	[H][C@]12[C@@]([C@](O)(CCC3=O)[C@]3(C)CC2)([H])CC=C([C@]41C)CC=CC4=O	InChI=1S/C19H24O3/c1-17-10-8-13-14(19(17,22)11-9-15(17)20)7-6-12-4-3-5-16(21)18(12,13)2/h3,5-6,13-14,22H,4,7-11H2,1-2H3/t13-,14+,17+,18-,19+/m0/s1	SSOWIOSOBYYHKD-JCZGSWPSSA-N	Physalis peruviana	2019	10.3762/bjoc.15.196	157
559	Nicphysatone B	C23H32O5	388.225	388.504	O=C1[C@@]2(C)[C@]([C@@H](O3)[C@@H]3C4C2C[C@H](O)[C@@]5(C)C4CCC5[C@@H](C(C)=O)C)(O)CC=C1	InChI=1S/C23H32O5/c1-11(12(2)24)13-7-8-14-18-15(10-17(26)21(13,14)3)22(4)16(25)6-5-9-23(22,27)20-19(18)28-20/h5-6,11,13-15,17-20,26-27H,7-10H2,1-4H3/t11-,13?,14?,15?,17+,18?,19+,20+,21-,22+,23+/m1/s1	LPEAVHMGCDMOBQ-QEFVRGRGSA-N	Nicandra physaloides	2018	10.1016/j.steroids.2018.01.003	144
560	6β,7α-Dihydroxynicandrenone 10	C21H24O5	356.162	356.418	O=C1[C@@]2(C)[C@]([C@H](O)[C@@H](O)[C@]3([H])[C@]2([H])CCC4=C3C=CC(C(C)=O)=C4)(O)CC=C1	InChI=1S/C21H24O5/c1-11(22)12-5-7-14-13(10-12)6-8-15-17(14)18(24)19(25)21(26)9-3-4-16(23)20(15,21)2/h3-5,7,10,15,17-19,24-26H,6,8-9H2,1-2H3/t15-,17-,18-,19+,20-,21-/m0/s1	CMKHYQOKIVSXQP-KKPFLKIHSA-N	Physalis pubeacens L.	2018	10.21577/0103-5053.20170105	106
561	Withapubeside C	C31H48O8	548.335	548.717	O[C@@H](C[C@H](O[C@@H]([C@@H]1O)O[C@H](CO)[C@@H](O)[C@@H]1O)C2)[C@@]3(C)C2=CC[C@]4([H])[C@]3([H])CC[C@@]5(C)[C@@]4([H])CC[C@]5([H])[C@@H](/C=C/C(C)=O)C	InChI=1S/C31H48O8/c1-16(5-6-17(2)33)21-9-10-22-20-8-7-18-13-19(38-29-28(37)27(36)26(35)24(15-32)39-29)14-25(34)31(18,4)23(20)11-12-30(21,22)3/h5-7,16,19-29,32,34-37H,8-15H2,1-4H3/b6-5+/t16-,19-,20+,21-,22+,23+,24-,25+,26-,27+,28-,29-,30-,31+/m1/s1	WSZPDOYJXZPZBL-CHYIANIHSA-N	Physalis pubeacens L.	2017	10.1039/c7ob02551c	132
562	Withapubeside D	C37H58O13	710.388	710.858	O[C@@H](C[C@H](O[C@@H]([C@@H]1O)O[C@H](CO[C@@H]([C@@H]2O)O[C@H](CO)[C@@H](O)[C@@H]2O)[C@@H](O)[C@@H]1O)C3)[C@@]4(C)C3=CC[C@]5([H])[C@]4([H])CC[C@@]6(C)[C@@]5([H])CC[C@]6([H])[C@@H](/C=C/C(C)=O)C	InChI=1S/C37H58O13/c1-17(5-6-18(2)39)22-9-10-23-21-8-7-19-13-20(14-27(40)37(19,4)24(21)11-12-36(22,23)3)48-35-33(46)31(44)29(42)26(50-35)16-47-34-32(45)30(43)28(41)25(15-38)49-34/h5-7,17,20-35,38,40-46H,8-16H2,1-4H3/b6-5+/t17-,20-,21+,22-,23+,24+,25-,26-,27+,28-,29-,30+,31+,32-,33-,34-,35-,36-,37+/m1/s1	BUMCSWMMCLWUEO-UWTDZWIBSA-N	Physalis pubeacens L.	2017	10.1039/c7ob02551c	132
563	17-(1α/1β-Methylpropanone)-nicandrenone	C23H26O4	366.183	366.457	O=C1[C@@]2(C)[C@]([C@@H](O3)[C@@H]3[C@]4([H])[C@]2([H])CCC5=C4C=CC(C(C)C(C)=O)=C5)(O)CC=C1	InChI=1S/C23H26O4/c1-12(13(2)24)14-6-8-16-15(11-14)7-9-17-19(16)20-21(27-20)23(26)10-4-5-18(25)22(17,23)3/h4-6,8,11-12,17,19-21,26H,7,9-10H2,1-3H3/t12?,17-,19-,20-,21-,22-,23-/m0/s1	VQFOJPNKEBMIOZ-PJIOLQCVSA-N	Nicandra physalodes	2018	10.21577/0103-5053.20170105	106
										934
